# Supplementary material for: Genome-wide Mapping Reveals Conservation of Promoter DNA Methylation Following Chicken Domestication
Source: PubMed Central journal article supplement (PMC4348661; doi:10.1038/srep08748), 2015-03-04
Supplement: srep08748-s1.pdf [file srep08748-s1.pdf]

## Supplementary information files

### Genome-wide Mapping Reveals Conservation of Promoter DNA

#### Methylation Following Chicken Domestication

Qinghe Li<sup>1,3\*</sup>, Yuanyuan Wang<sup>2,3\*</sup>, Xiaoxiang Hu<sup>3</sup>, Yaofeng Zhao<sup>3</sup>, and Ning Li<sup>3,4</sup>

<sup>1</sup> *Institute of Animal Sciences, Chinese Academy of Agricultural Sciences, Beijing, 100193, China;*

<sup>2</sup> *Department of Biological Sciences, Bengbu Medical College, Bengbu 233030, China;*

<sup>3</sup> *State Key Laboratory for Agro-biotechnology, China Agricultural University, Beijing 100193, China;* <sup>4</sup> *To whom correspondence should be addressed. E-mail:*

*ninglcau@cau.edu.cn. Tel: 86-10-62731142. Fax: 86-10-62733904. Address: No2 Yuanmingyuan W Rd, Beijing 100193, China*

\* These authors contributed equally to this work.

#### Supplemental Figure Legends

**Figure S1. Bisulfite-sequencing validation of methylated genes detected by meDIP-chip.** (A) Relative methylation scores of the proximal promoter of ENSGALT0000023309 and ENSGALT0000020243. (B) Bis-seq results of the proximal promoter of ENSGALT0000023309. (C) Bis-seq results of the proximal promoter of ENSGALT0000020243. The black circle represents the methylated CpG site and the white circle represents the unmethylated site.

**Figure S2. Bisulfite-sequencing validation of unmethylated genes detected by meDIP-chip.** (A) Relative methylation scores of the proximal promoter of ENSGALT0000016542 and ENSGALT0000008838. (B) Bis-seq results of the proximal promoter of ENSGALT0000016542. (C) Bis-seq results of the proximal promoter of ENSGALT0000008838.

**Figure S3. Bisulfite-sequencing validation of CHMGs identified by meDIP-seq.** (A) CAC1B. (B) PTPRU. (C) SCMH1. (D) Q5MB12.

**Figure S4. Bisulfite-sequencing validation of CLMGs identified by meDIP-seq.** (A) SLC25A39. (B) CDX4. (C) T22D1. (D) MAT3.

**Figure S5. Clustering of promoter DNA methylation of all 19 chickens.** The DNA methylation level was represented by relative methylation scores, and the RMSs of all genes were used for unsupervised hierarchical clustering.

**Figure S6. Validation of differentially methylated genes which proved to be false**

**positive between various chicken breeds by bis-seq.** Differentially methylated genes between the RJF and AA: (A) ENSGALT00000028623; (B) ENSGALT00000014058. Differentially methylated genes between the AA and WL: (C) ENSGALT0000000424; (D) ENSGALT00000031378; (E) ENSGALT00000010200; (F) ENSGALT00000036126; (G) ENSGALT00000040845.

**Figure S7. Heatmap shows comparison of DNA methylation level among chicken breeds for 795 individual CpG sites selected randomly from the genome.** The DNA methylation level was determined by sequencing 8 clones of bisulfite-treated DNA. Unmethylated CpG sites are shown in white; Methylated CpG sites are shown in red, with color intensity proportional to the methylation level; unavailable data is shown in gray. The pairwise correlation coefficient table shows the similarity of DNA methylation between chicken breeds.

**Figure S8. Relative methylation scores of promoter of *TSHR*, *VSTM2A* and *GHR* in the RJF, CH, AA and WL by meDIP-chip.**

**Figure S1**

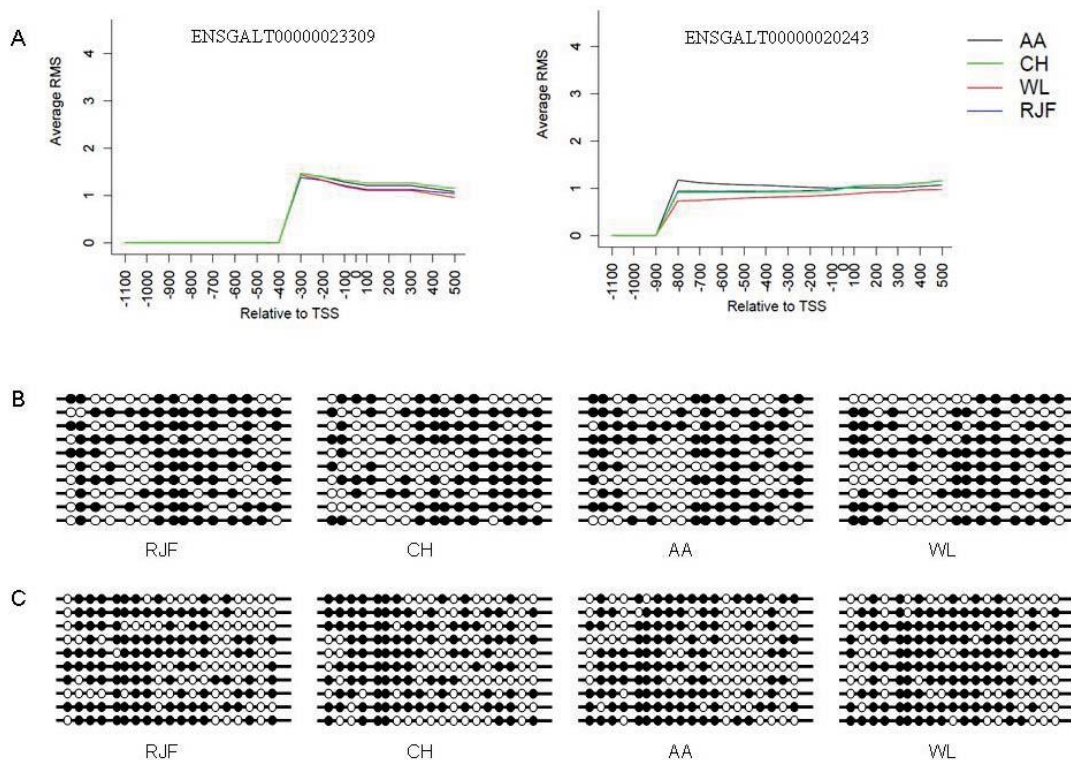

**Figure S2**

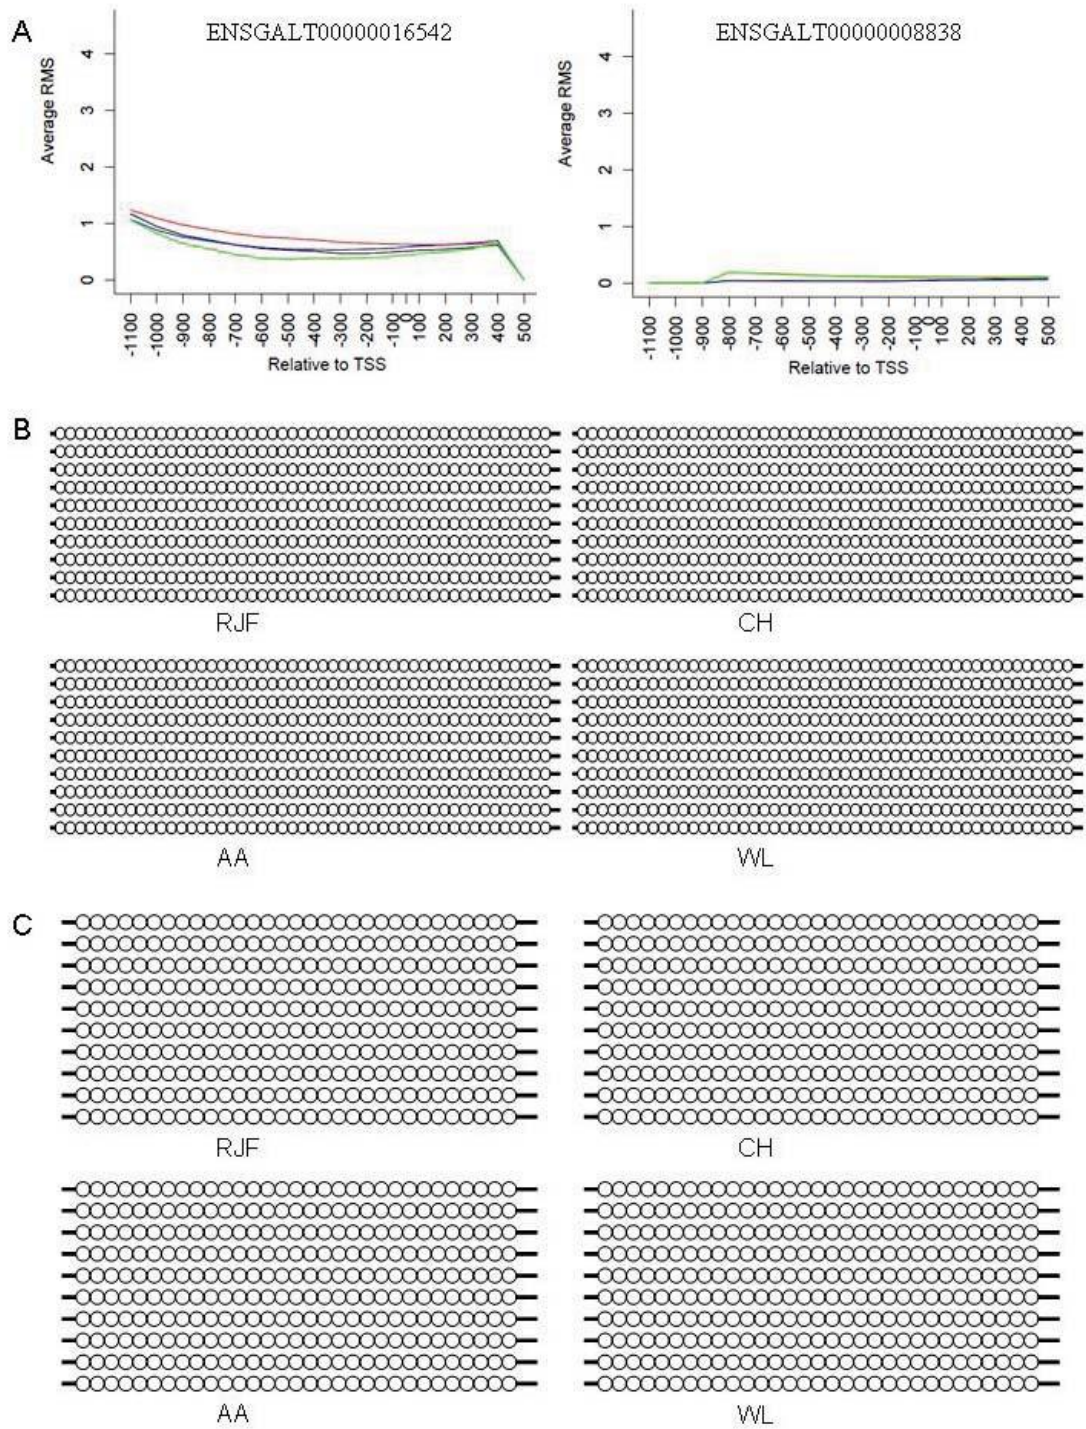

**Figure S3**

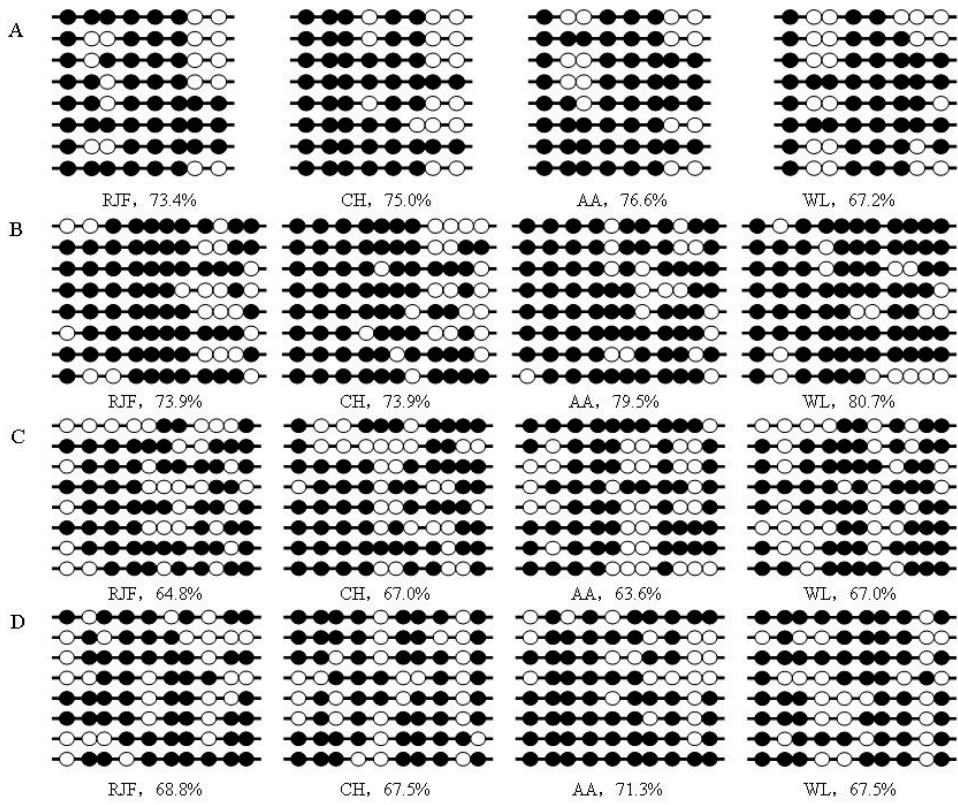

Figure S4

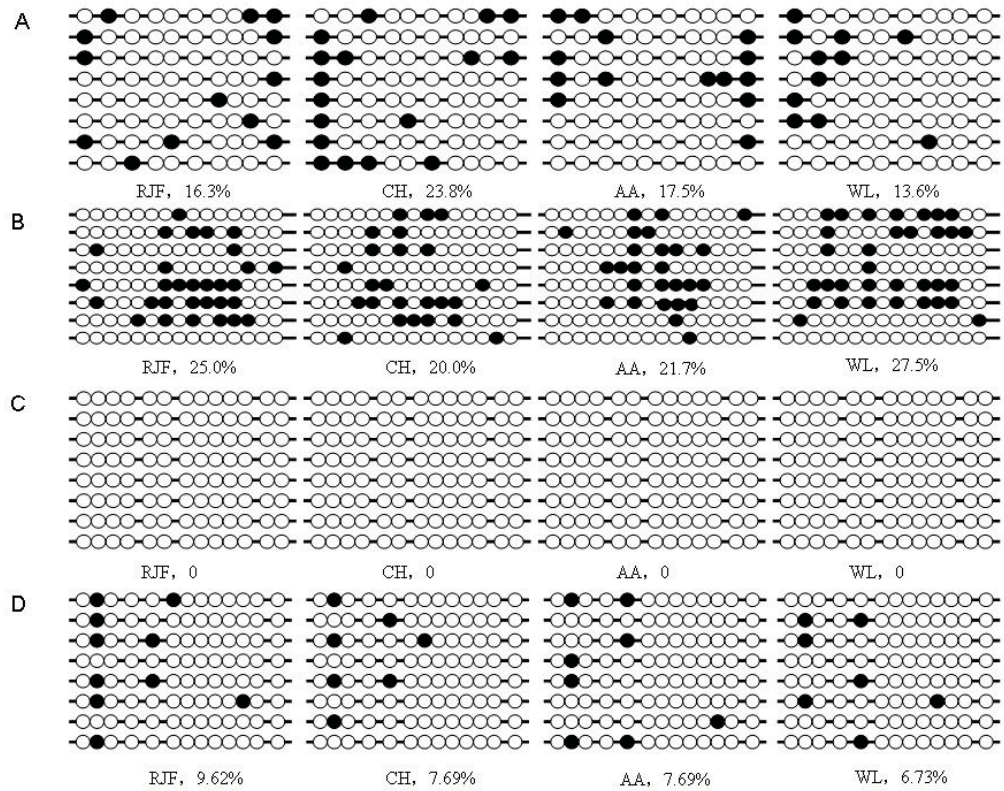

**Figure S5**

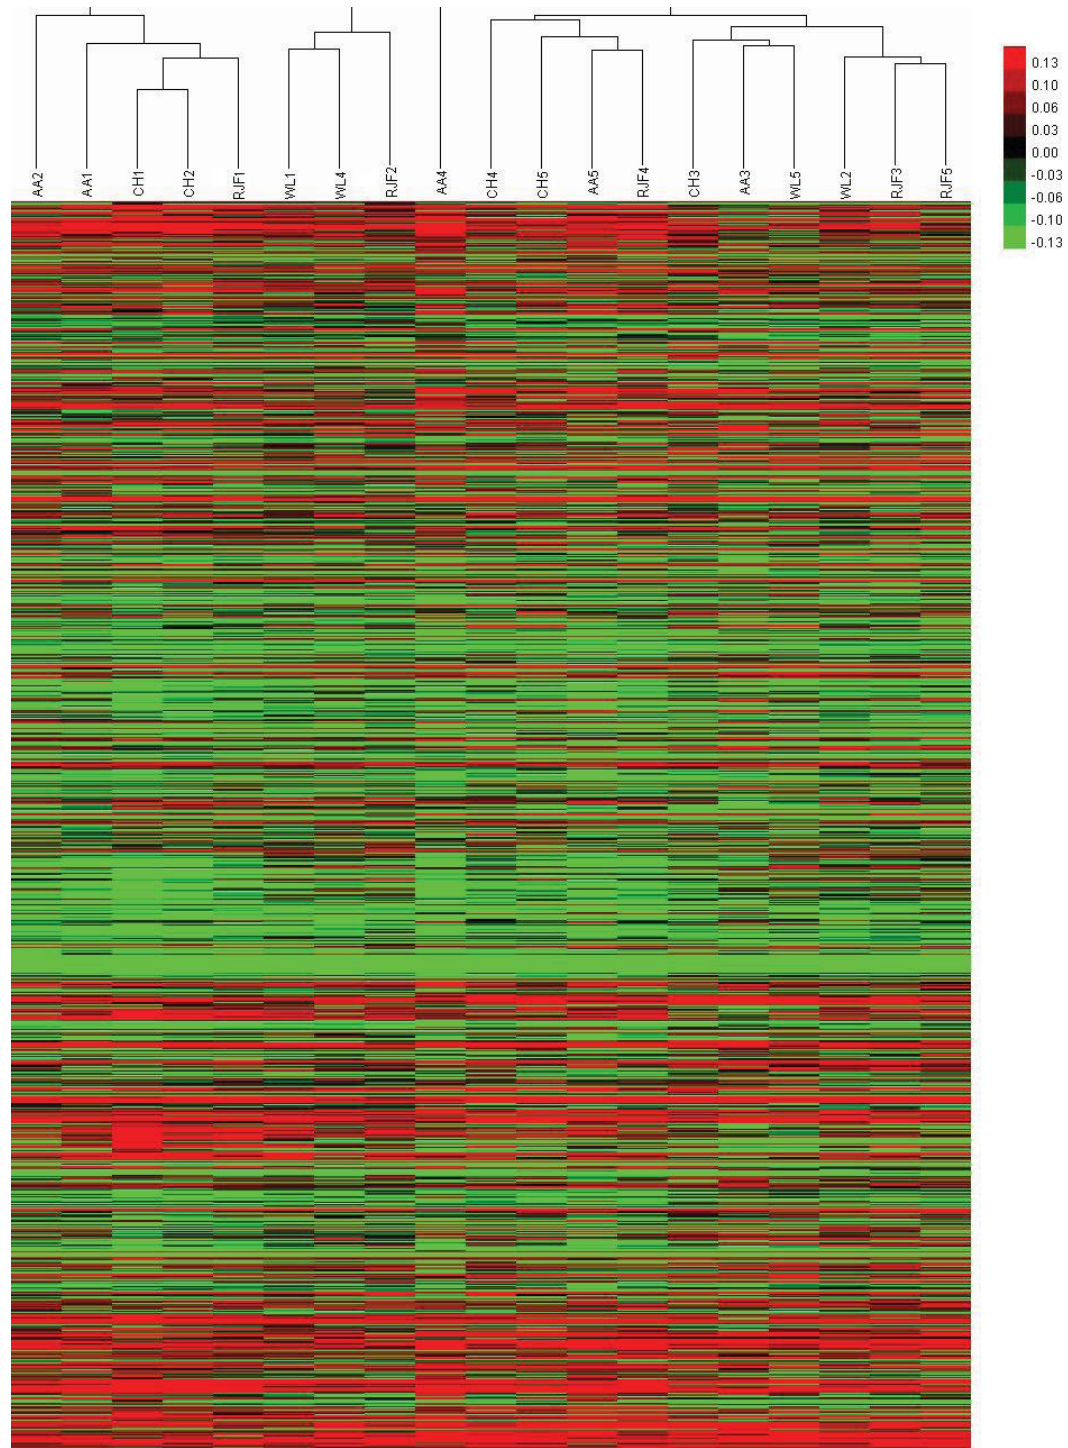

**Figure S6**

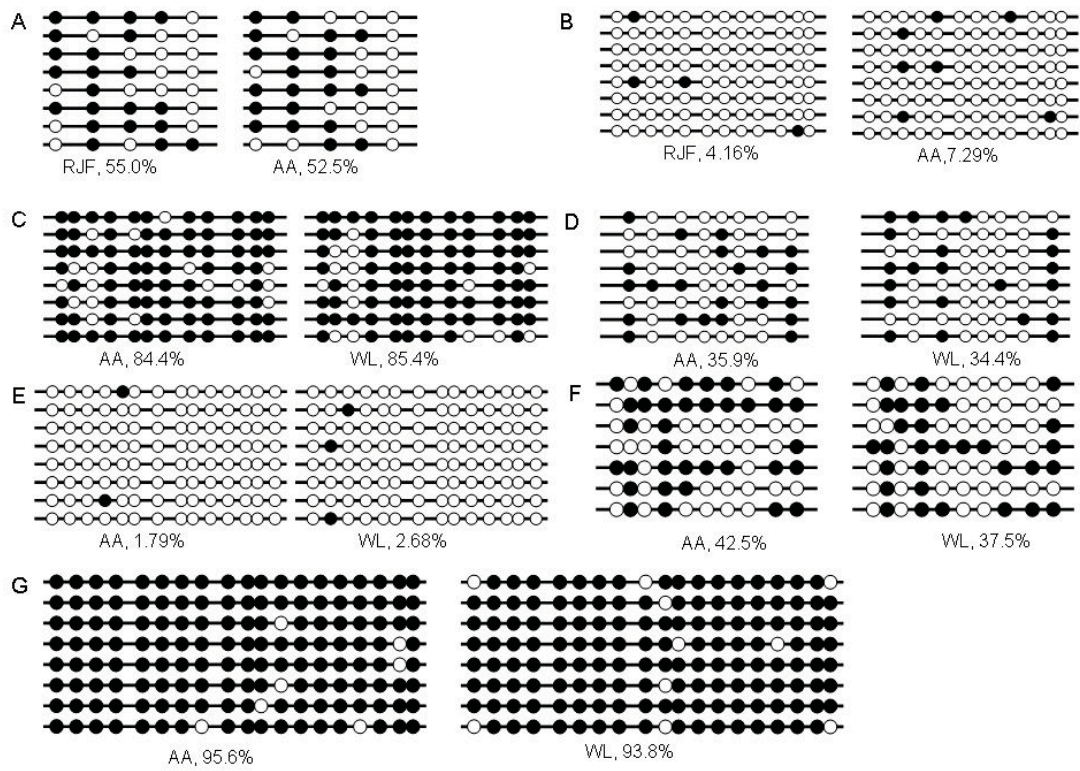

Figure S7

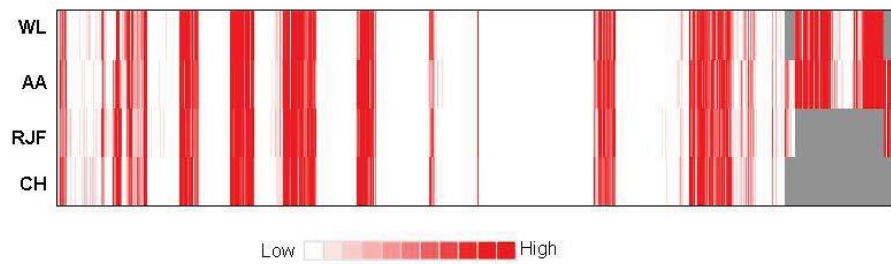

| CH | RJJF  | AA    | WL    |      |
|----|-------|-------|-------|------|
| 1  | 0.932 | 0.933 | 0.910 | CH   |
|    | 1     | 0.934 | 0.920 | RJJF |
|    |       | 1     | 0.937 | AA   |
|    |       |       | 1     | WL   |

Figure S8

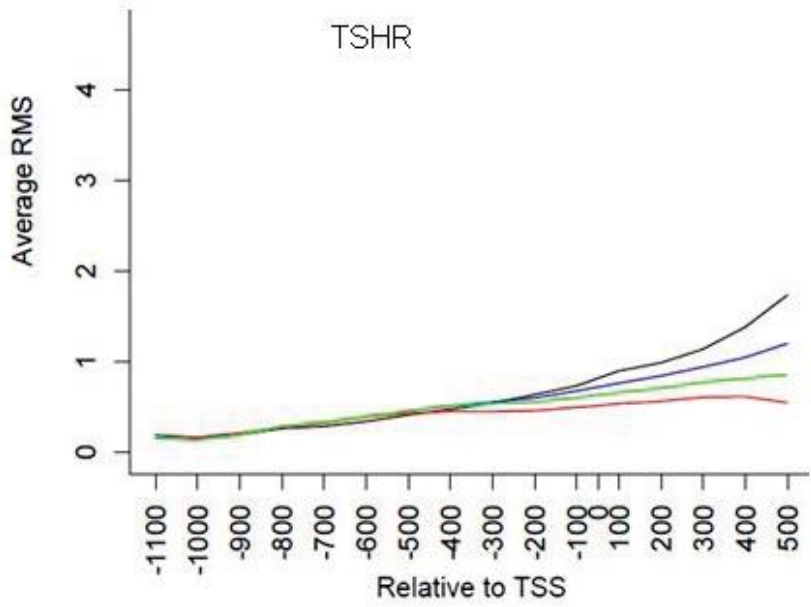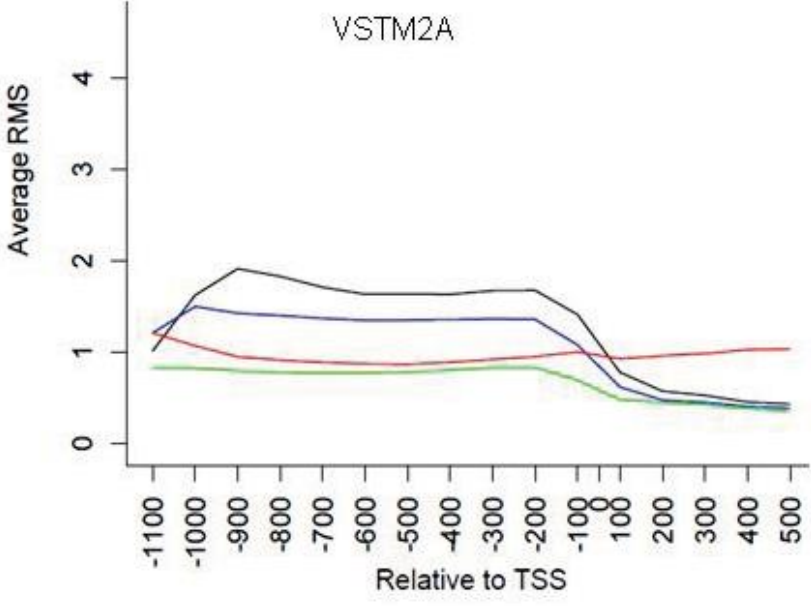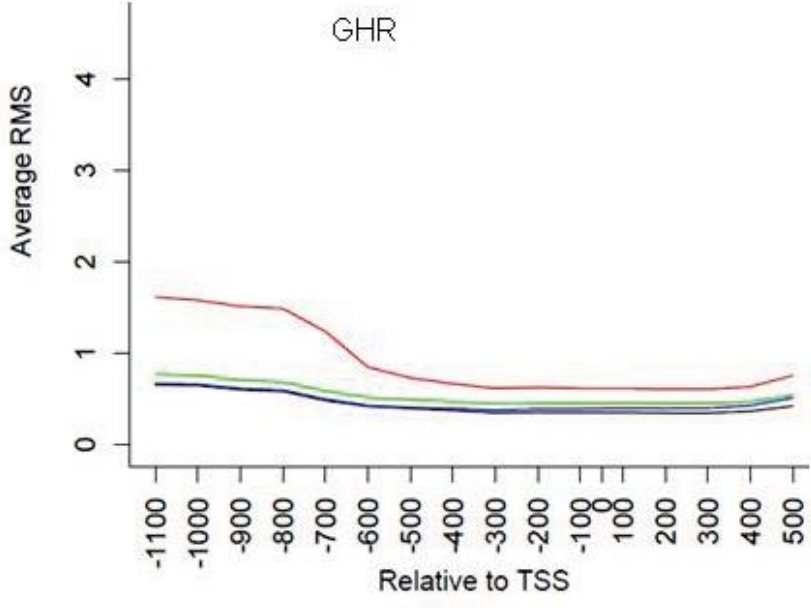

**Supplementary table 1. Conserved highly methylated genes and conserved lowly methylated genes between wild and domestic chicken breeds.**

| conserved highly methylated genes |                | conserved lowly methylated genes |                |
|-----------------------------------|----------------|----------------------------------|----------------|
|                                   | gene name      |                                  | gene name      |
| IPI00582379.2                     | CAC1B_CHICK    | NP_989455.1                      | IPI00595951.3  |
| IPI00598325.2                     | CAC1S_CHICK    | PAX6_CHICK                       | PTN1_CHICK     |
| NP_990255.1                       | IPI00818883.1  | MYCN_CHICK                       | IPI00821238.1  |
| Q9W6F1_CHICK                      | IPI00602405.3  | HSF2_CHICK                       | IPI00579178.2  |
| IPI00601756.3                     | IPI00572260.3  | IPI00684164.3                    | IPI00585584.1  |
| Q9I9A1_CHICK                      | TBA5_CHICK     | XR_026852.1                      | IPI00598654.2  |
| IPI00581939.2                     | IPI00684141.2  | NP_001026079.1                   | PTPRU_CHICK    |
| IPI00819296.1                     | IPI00591213.3  | IPI00684197.1                    | IPI00683221.2  |
| LIPL_CHICK                        | IPI00818931.1  | IPI00581259.3                    | IPI00596758.3  |
| IPI00595677.2                     | IPI00679593.3  | IPI00587069.3                    | O42253_CHICK   |
| Q8UWH4_CHICK                      | IPI00588910.3  | Q8UVD8_CHICK                     | IPI00598635.3  |
| IPI00603812.3                     | IPI00923820.1  | NP_001012900.1                   | IPI00592428.3  |
| IPI00576588.3                     | IPI00582347.2  | NP_001025507.1                   | IPI00578239.2  |
| B3TZC0_CHICK                      | IPI00603026.3  | MYF5_CHICK                       | NP_990738.1    |
| XR_027237.1                       | IPI00818951.1  | IPI00818973.1                    | Q91969_CHICK   |
| IPI00599405.1                     | IPI00681245.2  | Q9PTK0_CHICK                     | SMAD5_CHICK    |
| IPI00576976.3                     | Q5ZJA5_CHICK   | HXA9_CHICK                       | NP_001019997.1 |
| 41_CHICK                          | Q5ZJA5_CHICK   | IPI00592130.3                    | NP_989892.1    |
| IPI00575887.2                     | IPI00811176.2  | IPI00593183.3                    | Q56IA0_CHICK   |
| IPI00572954.3                     | IPI00574878.3  | Q9YGP8_CHICK                     | TGFR2_CHICK    |
| IPI00588910.3                     | GBRG4_CHICK    | IPI00587855.3                    | IPI00572212.3  |
| LOC429840                         | JAK2_CHICK     | IPI00813273.1                    | XR_027234.1    |
| IPI00588662.2                     | IPI00573310.3  | IPI00593469.4                    | IPI00819554.1  |
| ASSY_CHICK                        | IPI00598751.1  | GATA6_CHICK                      | TDRD3_CHICK    |
| NP_001012901.1                    | IPI00589711.3  | NFKB1_CHICK                      | IPI00820435.1  |
| IPI00883233.1                     | NP_989516.1    | IPI00811057.2                    | NP_001026106.1 |
| MUSK_CHICK                        | IPI00588585.3  | IPI00573704.3                    | IPI00582553.2  |
| NP_989516.1                       | Q9YI46_CHICK   | NP_001032915.1                   | NP_990006.1    |
| NP_990231.1                       | IPI00583429.3  | NP_989557.1                      | NP_001032346.1 |
| NP_990361.1                       | IPI00822099.1  | IPI00681554.2                    | NP_001032351.1 |
| IPI00598120.3                     | IPI00820240.1  | REL_CHICK                        | Q3L248_CHICK   |
| MOT3_CHICK                        | NP_001025776.1 | NP_001025866.1                   | NP_989667.1    |
| IPI00591373.2                     | NP_001026133.1 | Q9YHW7_CHICK                     | Q3L250_CHICK   |
| IPI00603080.3                     | IPI00823338.1  | NP_990547.1                      | WNT9A_CHICK    |
| IPI00581939.2                     | NP_990264.1    | Q9DGG1_CHICK                     | IPI00588858.2  |
| B3TZC0_CHICK                      | IPI00820356.1  | IRF1_CHICK                       | Q5ZI90_CHICK   |



|                |                |                |                |
|----------------|----------------|----------------|----------------|
| SPP24_CHICK    | Q90715_CHICK   | IPI00596933.2  | IPI00587489.4  |
| XR_026966.1    | IPI00811921.2  | IPI00587901.3  | IPI00822922.1  |
| Q9W6J0_CHICK   | NP_989998.1    | HHEX_CHICK     | Q8AY19_CHICK   |
| IPI00579614.2  | IPI00583002.3  | NP_990226.1    | IPI00588817.2  |
| IPI00601177.2  | B3TZC0_CHICK   | Q5ZMD5_CHICK   | TRPC7          |
| IPI00594166.3  | Q9I8D3_CHICK   | IPI00819883.1  | CAC1B_CHICK    |
| NP_001006325.1 | NP_990533.1    | SMAD5_CHICK    | IPI00811977.2  |
| XR_027135.1    | CHST3_CHICK    | IRF2_CHICK     | IPI00595398.3  |
| TEAD3_CHICK    | IPI00811970.2  | IPI00574747.3  | ACHA5_CHICK    |
| IPI00577484.3  | Q5F3F8_CHICK   | NP_990424.1    | IPI00821979.1  |
| STAT3_CHICK    | IPI00684792.2  | IPI00600306.2  | Q9DEX2_CHICK   |
| IPI00685033.2  | IPI00583922.3  | IPI00573114.3  | NP_990545.1    |
| IPI00579018.2  | IPI00822779.1  | IPI00820558.1  | IPI00603425.3  |
| IPI00589786.2  | NP_989451.1    | NP_989781.1    | IPI00598119.3  |
| NP_989444.1    | IPI00598333.2  | Q9YHW5_CHICK   | A0M8U4_CHICK   |
| IPI00594235.2  | NP_001020005.1 | HXA11_CHICK    | IPI00819902.1  |
| IPI00594192.2  | IPI00821317.1  | IPI00684025.2  | Q8AV15_CHICK   |
| NP_990051.1    | IPI00588225.2  | DMRT1_CHICK    | IPI00820292.1  |
| NP_989922.1    | IPI00601442.4  | IPI00680566.2  | IPI00571508.3  |
| IPI00600142.2  | IPI00821827.1  | IPI00584637.3  | LOC430136      |
| NP_001007079.1 | NP_001009878.1 | ANF1_CHICK     | GBRB3_CHICK    |
| CCL4_CHICK     | IPI00579118.2  | NP_001019997.1 | IPI00575771.3  |
| NP_998752.1    | IPI00599589.2  | XR_026766.1    | Q90590_CHICK   |
| IPI00822006.1  | Q5ZMK6_CHICK   | IPI00820569.1  | IPI00589286.3  |
| NP_989998.1    | NP_001026661.1 | NP_990429.1    | NP_001004409.1 |
| IPI00597131.2  | NP_001034349.1 | IPI00818195.1  | NP_996862.1    |
| IPI00582635.3  | IPI00581601.3  | IPI00597240.3  | Q9PUI8_CHICK   |
| IPI00810591.2  | Q98SE8_CHICK   | NP_997060.1    | NP_989903.1    |
| IPI00818613.1  | IPI00588662.2  | BMAL2_CHICK    | IPI00602335.3  |
| IPI00822606.1  | IPI00820134.1  | NPAS2_CHICK    | IPI00812061.1  |
| IPI00682695.2  | B9VGZ4_CHICK   | IPI00818178.1  | O42421_CHICK   |
| IPI00681326.2  | IPI00603868.3  | NP_001006192.1 | CAC1C_CHICK    |
| IPI00600235.3  | IPI00603868.3  | Q90692_CHICK   | IPI00573170.2  |
| IPI00585170.3  | IPI00680595.1  | HXB5_CHICK     | NP_989657.1    |
| XR_026898.1    | IPI00579614.2  | TCP4_CHICK     | IPI00684904.2  |
| IPI00573538.3  | HBAD_CHICK     | NP_001025509.1 | NP_996757.1    |
| NP_990255.1    | IPI00683979.2  | IPI00589286.3  | IPI00587021.3  |
| MOT3_CHICK     | NP_001026461.1 | NP_989784.1    | IPI00600977.2  |
| IPI00598902.3  | IPI00814019.2  | NP_990248.1    | IPI00821254.1  |
| IPI00596658.3  | IPI00813937.2  | IPI00591458.2  | NP_001001774.1 |
| IPI00820646.1  | IPI00581849.2  | IPI00577997.3  | ACHB4_CHICK    |
| NP_001007083.1 | IPI00813977.2  | MTA3           | GBRG2_CHICK    |

|                |                |                |                |
|----------------|----------------|----------------|----------------|
| LOC429840      | IPI00822658.1  | IPI00581941.2  | IPI00599050.2  |
| NP_001012901.1 | IPI00573310.3  | IPI00822713.1  | IPI00600831.3  |
| NP_990023.1    | IPI00582347.2  | Q9I9A0_CHICK   | IPI00579185.1  |
| XR_026842.1    | IPI00812731.2  | IPI00581321.3  | O42418_CHICK   |
| XR_026797.1    | NP_001026044.1 | Q8UVS4_CHICK   | IPI00592966.3  |
| IPI00592554.3  | IPI00602372.2  | IPI00595711.3  | NP_989622.1    |
| CAC1S_CHICK    | Q6EE28_CHICK   | LHX9_CHICK     | IPI00571830.2  |
| IPI00580553.3  | IPI00574878.3  | FOXP1_CHICK    | IPI00682164.2  |
| IPI00578050.2  | IPI00601317.2  | NP_001007082.1 | IPI00683221.2  |
| CAC1B_CHICK    | Q5MB12_CHICK   | Q5ZJU1_CHICK   | IPI00578166.3  |
| XR_027000.1    | STXB1_CHICK    | NP_989947.1    | IPI00575434.2  |
| IPI00585829.3  | IPI00822695.1  | IPI00571967.3  | IPI00819156.1  |
| IPI00684598.2  | NP_001026133.1 | IPI00588986.3  | IPI00573257.4  |
| NP_990449.1    | IPI00819296.1  | PIT1_CHICK     | IPI00594975.3  |
| Q5F3F8_CHICK   | IPI00581109.2  | IPI00584692.3  | IPI00581122.2  |
| Q9I9L4_CHICK   | Q9I9A1_CHICK   | NP_990075.1    | IPI00680807.1  |
| PRKDC_CHICK    | IPI00680595.1  | IPI00586440.3  | IPI00581122.2  |
| NP_001019999.1 | CP19A_CHICK    | TBX5_CHICK     | IPI00680807.1  |
| DNAS1_CHICK    | NP_001001879.1 | XR_026691.1    | IPI00581122.2  |
| IPI00581264.3  | IPI00586199.3  | IPI00581805.2  | IPI00680807.1  |
| B9VGZ4_CHICK   | IPI00820998.1  | IPI00599426.3  | IPI00813164.1  |
| Q9I9L4_CHICK   | P4HA1_CHICK    | PITX1_CHICK    | IPI00578253.2  |
| IPI00915707.1  | NP_001006539.1 | NP_990529.1    | MYF5_CHICK     |
| IPI00818883.1  | IPI00596674.2  | RX1_CHICK      | MYF6_CHICK     |
| IPI00818883.1  | IPI00818131.1  | IPI00599092.3  | NP_989749.1    |
| PTPRU_CHICK    | IPI00883262.1  | NP_990468.1    | Q8AV15_CHICK   |
| IPI00596340.2  | IPI00580553.3  | IPI00595893.3  | XR_026692.1    |
| IPI00580149.4  | IPI00819512.1  | IPI00820211.1  | O42421_CHICK   |
| NP_990738.1    | MUSK_CHICK     | IPI00583810.3  | AT1B1_CHICK    |
| NP_001026046.1 | IPI00821654.1  | NP_990083.1    | NP_001038116.1 |
| IPI00593651.3  | IPI00683578.2  | HOXC10         | O42418_CHICK   |
| IPI00581849.2  | IPI00600691.2  | IPI00585593.3  | IPI00600831.3  |
| NP_990071.1    | IPI00583816.3  | DBX2_CHICK     | IPI00579948.2  |
| IPI00813977.2  | XR_026966.1    | IPI00822726.1  | NTCP7_CHICK    |
| Q9W6S4_CHICK   | NP_001034685.1 | NP_001012899.1 | Q5ZKL3_CHICK   |
| IPI00822658.1  | PRPF3_CHICK    | IPI00588048.1  | IPI00579184.3  |
| IPI00574878.3  | SIAT2_CHICK    | ZFHX4_CHICK    | IPI00582562.3  |
| NP_989615.1    | IPI00578091.2  | T22D1_CHICK    | FMN_CHICK      |
| NP_990121.1    | IPI00582425.3  | IPI00589167.2  | IPI00818552.1  |
| IPI00583816.3  | IPI00602405.3  | IPI00883106.1  | IPI00820183.1  |
| IPI00680647.2  | XR_026961.1    | GATA2_CHICK    | NP_989541.1    |
| IPI00811921.2  | GBRG4_CHICK    | NP_001008480.1 | IPI00819058.1  |

|                |                |                |                |
|----------------|----------------|----------------|----------------|
| Q9YI46_CHICK   | NP_998737.1    | IPI00603116.2  | NP_001012572.1 |
| IPI00575389.3  | GLL9_CHICK     | NP_989892.1    | NP_001026249.1 |
| IPI00581147.3  | NP_001025825.1 | Q5IHK1_CHICK   | IPI00571442.3  |
| IPI00580198.3  | IPI00585123.2  | NP_001026113.1 | IPI00684538.1  |
| IPI00604389.4  | IPI00581147.3  | IPI00822861.1  | NP_001026375.1 |
| XR_026966.1    | IPI00594309.3  | IPI00582267.3  | IPI00680633.1  |
| IPI00820646.1  | IPI00576188.3  | TBXT_CHICK     | IPI00818548.1  |
| IPI00574878.3  | EYA3_CHICK     | Q804C5_CHICK   | LOC768699      |
| Q9I9A1_CHICK   | IPI00819539.1  | RABL3_CHICK    | PIMT_CHICK     |
| IPI00570973.3  | NP_001026044.1 | PO2F1_CHICK    | IPI00588987.3  |
| IPI00573310.3  | Q9I9L4_CHICK   | IPI00600145.2  | NP_001034387.1 |
| IPI00683578.2  | IPI00822849.1  | IPI00684173.2  | IPI00593095.4  |
| IPI00602313.2  | IPI00585123.2  | NP_001012932.1 | IPI00593079.4  |
| NP_001025776.1 | IPI00594309.3  | ATF2_CHICK     | IPI00602488.2  |
| MUSK_CHICK     | IPI00582425.3  | MYF6_CHICK     | IPI00581174.1  |
| JAK2_CHICK     | IPI00820202.1  | Q6DV99_CHICK   | NP_001026138.1 |
| IPI00572942.2  | STXB1_CHICK    | THB_CHICK      | Q98SE8_CHICK   |
| IPI00582379.2  | IPI00820134.1  | Q98TX8_CHICK   | IPI00593770.1  |
| IPI00589446.2  | IPI00570702.1  | NP_001012971.1 | IPI00604167.3  |
| IPI00821654.1  | IPI00820202.1  | LOC777298      | O42347_CHICK   |
| IPI00588134.2  | DJC16_CHICK    | JUN_CHICK      | IPI00587316.3  |
| Q6EE28_CHICK   | TBA5_CHICK     | HMGX7_CHICK    | IPI00821253.1  |
| IPI00598902.3  | CAC1S_CHICK    | RARB_CHICK     | IPI00601634.2  |
| IPI00602664.3  | CAC1B_CHICK    | IPI00600721.3  | Q5ZK22_CHICK   |
| LOC429840      | IPI00598329.3  | HMX1_CHICK     | IPI00682165.2  |
| NP_001007083.1 | IPI00822606.1  | IPI00591858.4  | IPI00574019.3  |
| GBRG4_CHICK    | IPI00603812.3  | NP_989437.1    | IPI00595617.2  |
| NP_990023.1    | IPI00820913.1  | IRF3_CHICK     | IPI00595358.4  |
| IPI00580553.3  | IPI00602405.3  | IPI00579574.1  | IPI00602532.4  |
|                |                | MEF2A_CHICK    | Q9YH83_CHICK   |
|                |                | Q5ZJZ7_CHICK   | NP_001006408.1 |
|                |                | HMX3_CHICK     | NP_001034361.1 |
|                |                | IPI00582563.4  | NP_001026517.1 |
|                |                | IPI00819684.1  | NP_001026111.1 |
|                |                | IPI00585822.3  | NP_001006178.1 |
|                |                | IPI00598714.3  | IPI00823190.1  |
|                |                | HIRA_CHICK     | IPI00822156.1  |
|                |                | Q56IA0_CHICK   | NP_001034378.1 |
|                |                | DLX5_CHICK     | IPI00586051.2  |
|                |                | HSF3_CHICK     | Q5ZMQ6_CHICK   |
|                |                | HES1_CHICK     | IPI00592219.2  |
|                |                | IPI00818474.1  | NP_001029995.1 |

|                |                |
|----------------|----------------|
| IPI00682833.1  | IPI00592615.3  |
| Q9W6V3_CHICK   | IPI00584834.3  |
| NP_001012867.1 | ERCC3_CHICK    |
| IPI00590021.3  | Q5ZJA5_CHICK   |
| IPI00684235.2  | FRIH_CHICK     |
| NP_989873.1    | NP_990538.1    |
| IPI00588035.3  | NP_001012931.1 |
| NP_001025747.1 | IPI00598923.3  |
| NP_001026089.1 | NP_001026165.1 |
| HMD2_CHICK     | IPI00587790.2  |
| COT2_CHICK     | IPI00812875.2  |
| XR_027111.1    | IPI00596143.2  |
| VAX1_CHICK     | NP_989717.1    |
| NP_001039307.2 | IPI00600118.2  |
| IPI00822649.1  | Q9DGH8_CHICK   |
| IPI00579183.2  | IPI00811977.2  |
| TEAD4_CHICK    | IPI00602335.3  |
| IPI00591072.2  | IPI00812061.1  |
| NP_990134.1    | GBRG2_CHICK    |
| IPI00819473.1  | NP_001025543.1 |
| IPI00598916.2  | JAK2_CHICK     |
| NP_001026301.1 | IPI00814205.2  |
| IPI00819110.1  | NP_990201.1    |
| GNAI1_CHICK    | IPI00596042.3  |
| IPI00812390.2  | HMCS1_CHICK    |
| IPI00594142.3  | IPI00572129.2  |
| Q8QGC2_CHICK   | NP_989816.1    |
| IPI00592368.2  | IPI00572039.3  |
| IPI00602218.2  | VATB_CHICK     |
| IPI00599896.3  | NP_989617.1    |
| IPI00818522.1  | IPI00599296.1  |
| IPI00811726.2  | NP_001006281.1 |
| LOC776109      | IPI00577304.2  |
| IPI00820253.1  | IPI00574801.3  |
| NP_001026186.1 | BLM_CHICK      |
| IPI00820683.1  | NP_989631.1    |
| IPI00818964.1  | IPI00591558.3  |
| IPI00590976.3  | NP_001006183.1 |
| IPI00821858.1  | IPI00571304.3  |
| B8YLW8_CHICK   | IPI00602959.3  |
| NP_001012626.1 | IPI00575167.3  |
| IPI00573243.1  | Q98SN6_CHICK   |

|               |                |
|---------------|----------------|
| IPI00597246.2 | Q98SN5_CHICK   |
| IPI00821150.1 | NP_001012846.1 |
| IPI00814458.2 | IPI00818080.1  |
| IPI00811748.2 | IPI00819012.1  |
| IPI00595552.2 | IPI00573005.3  |
| IPI00822075.1 | IPI00819012.1  |
| IPI00822483.1 | IPI00573005.3  |
| B4X7J8_CHICK  | IPI00680942.2  |
| IPI00584101.1 | IPI00683861.2  |
| IPI00590757.2 | IPI00813935.2  |
| IPI00604290.2 | NP_001006128.1 |
| IPI00812092.1 | XR_027146.1    |
| OLF6_CHICK    | NP_989634.1    |
| IPI00680065.2 | PUR2_CHICK     |
| IPI00813698.2 | Q9I9L4_CHICK   |
| IPI00811681.2 | IPI00604192.3  |
| IPI00599818.3 | PYRG2_CHICK    |
| IPI00814014.2 | IPI00587904.2  |
| IPI00681022.2 | Q9DEI0_CHICK   |
| IPI00812432.2 | KU70_CHICK     |
| IPI00591114.1 | PRKDC_CHICK    |
| XR_026927.1   | IPI00588538.3  |
| IPI00594533.1 | IPI00603535.1  |
| IPI00594681.3 | SYIM_CHICK     |
| IPI00683370.2 | IPI00581192.3  |
| IPI00813684.2 | IPI00574953.3  |
| IPI00586811.3 | IPI00595228.3  |
| IPI00819799.1 | NP_001039306.1 |
| IPI00822579.1 | NP_001026419.1 |
| Q9PTB1_CHICK  | IPI00595672.2  |
| IPI00578651.1 | IPI00599090.4  |
| IPI00598001.2 | NP_001006449.1 |
| IPI00585336.3 | IPI00581279.1  |
| IPI00818625.1 | IPI00574749.2  |
| IPI00818636.1 | Q5F3K9_CHICK   |
| IPI00597885.2 | NP_001028816.1 |
| IPI00599070.1 | IPI00590522.1  |
| IPI00822268.1 | IPI00571526.3  |
| IPI00572187.3 | IPI00684413.2  |
| IPI00680211.2 | Q9IAA6_CHICK   |
| NP_990267.1   | GEPH_CHICK     |
| IPI00594769.2 | RAN_CHICK      |

|                |                |
|----------------|----------------|
| NP_001006530.1 | IPI00820543.1  |
| IPI00819354.1  | IPI00573393.3  |
| IPI00584907.3  | IPI00598758.2  |
| IPI00680945.2  | IPI00584639.3  |
| IPI00681234.2  | FAK1_CHICK     |
| NP_001026578.1 | XR_026865.1    |
| IPI00582057.3  | IPI00578493.3  |
| UBP7_CHICK     | DMRT1_CHICK    |
| NP_989539.1    | IPI00581941.2  |
| IPI00579016.3  | IPI00582808.4  |
| NP_001006130.1 | KIT_CHICK      |
| IPI00582957.1  | FGFR2_CHICK    |
| LOC771424      | FGFR3_CHICK    |
| NP_997702.1    | IPI00574892.2  |
| XR_027094.1    | IPI00587195.3  |
| IPI00819480.1  | PUR2_CHICK     |
| NP_001026141.1 | Q9I9L4_CHICK   |
| IPI00574592.3  | IPI00812569.2  |
| NP_001006134.1 | IPI00572041.2  |
| IPI00592203.4  | IPI00577839.1  |
| NP_001026250.1 | PRPS2_CHICK    |
| IPI00598742.2  | MTDC_CHICK     |
| IPI00590577.3  | XR_027102.1    |
| XR_027086.1    | XR_027140.1    |
| IPI00573052.3  | IPI00682187.2  |
| Q8JHZ7_CHICK   | NP_001006294.1 |
| PSA1_CHICK     | NP_001006202.1 |
| Q9DFY9_CHICK   | Q91429_CHICK   |
| NP_001026294.1 | XR_027092.1    |
| IPI00591077.3  | Q91429_CHICK   |
| HS90B_CHICK    | XR_027092.1    |
| PPIB_CHICK     | NP_001026732.1 |
| ENPL_CHICK     | IPI00588119.1  |
| IPI00600671.2  | NP_001025711.1 |
| IPI00581078.3  | LDHA_CHICK     |
| IPI00575389.3  | IPI00820902.1  |
| IPI00598319.2  | IPI00592631.1  |
| NP_001006250.1 | IPI00821229.1  |
| NP_001012581.1 | IPI00595685.3  |
| IPI00602969.1  | Q91429_CHICK   |
| IPI00579432.3  | XR_027092.1    |
| NP_001025723.1 | VATB_CHICK     |

|                |                |
|----------------|----------------|
| Q90634_CHICK   | NP_989617.1    |
| IPI00594320.3  | NP_990363.1    |
| IPI00603058.5  | NP_001026601.1 |
| IPI00571105.1  | IPI00591811.3  |
| NP_001026546.1 | NP_001026125.1 |
| NP_001026395.1 | IPI00578026.1  |
| NP_990398.1    | IPI00592265.3  |
| IPI00591376.3  | NP_990190.1    |
| IPI00572589.2  | NP_990189.1    |
| TCPQ_CHICK     | NP_001012626.1 |
| IPI00822858.1  | IPI00596756.3  |
| NP_001020780.1 | NP_989772.1    |
| IPI00821442.1  | LOC768848      |
| NP_001005841.1 | IPI00597292.2  |
| IPI00603388.4  | Q5ZJE8_CHICK   |
| NP_001005431.1 | IPI00598554.3  |
| NP_989972.1    | IPI00581647.4  |
| NP_001025780.1 | IPI00590695.2  |
| Q5ZIM9_CHICK   | NP_001006496.1 |
| IPI00598641.3  | NP_001025536.1 |
| NP_001026088.1 | Q98946_CHICK   |
| IPI00596524.2  | IPI00819162.1  |
| NP_001026764.1 | Q91015_CHICK   |
| NP_001025179.1 | NP_001006390.1 |
| IPI00592452.3  | IPI00603013.3  |
| NP_001012914.1 | FYN_CHICK      |
| NP_001012877.1 | IPI00579079.2  |
| NP_001012961.1 | IPI00580681.2  |
| IPI00575458.1  | IPI00582590.2  |
| IPI00578203.2  | RAB10_CHICK    |
| NP_001006261.1 | IPI00572853.2  |
| NP_001034575.1 | IPI00589508.2  |
| IPI00577874.1  | IPI00594950.3  |
| XR_026901.1    | IPI00582273.3  |
| IPI00589670.2  | Q90YX6_CHICK   |
| NP_001006586.1 | IPI00589108.3  |
| Q5ZMT6_CHICK   | RAB6A_CHICK    |
| IPI00813204.2  | IPI00601244.1  |
| IPI00604093.1  | IPI00582335.1  |
| IPI00597800.2  | IPI00594309.3  |
| IPI00597412.2  | CHMP7_CHICK    |
| IPI00586708.3  | IPI00603242.2  |

|                |                |
|----------------|----------------|
| IPI00596855.3  | IPI00821845.1  |
| LOC769161      | NP_001026240.1 |
| IPI00572599.2  | IPI00601632.3  |
| IPI00598430.2  | IPI00570706.3  |
| Q91969_CHICK   | IPI00579759.1  |
| IPI00571773.2  | XR_026693.1    |
| NP_001025543.1 | NP_989543.1    |
| IPI00814085.1  | NP_989760.1    |
| IPI00818166.1  | NP_001026187.1 |
| IPI00591988.3  | IPI00820960.1  |
| NP_990688.1    | IPI00591992.3  |
| IPI00590707.3  | NP_001033782.1 |
| KC1A_CHICK     | IPI00583618.3  |
| NP_001004368.1 | XR_026928.1    |
| NP_989979.1    | IPI00818895.1  |
| IPI00588613.2  | NP_001026163.1 |
| IPI00594257.3  | IPI00592525.3  |
| FGFR2_CHICK    | NP_989432.1    |
| XR_027234.1    | IPI00598807.3  |
| IPI00588803.3  | IPI00594788.2  |
| NP_990386.1    | IPI00575586.3  |
| Q5ZHL2_CHICK   | Q5ZMV1_CHICK   |
| IPI00813807.2  | IPI00591196.2  |
| JAK2_CHICK     | IPI00821350.1  |
| IPI00596460.3  | XR_026654.1    |
| IPI00587022.3  | IPI00573182.3  |
| NP_001012805.1 | IPI00602389.3  |
| NP_989691.1    | NP_001026554.1 |
| Q9PT87_CHICK   | IPI00597610.2  |
| IPI00822302.1  | XR_027032.1    |
| IPI00820353.1  | FMN_CHICK      |
| NP_989481.1    | CAZA2_CHICK    |
| IPI00591806.3  | IPI00818552.1  |
| IPI00598794.2  | Q5ZL50_CHICK   |
| KIT_CHICK      | IPI00820183.1  |
| IPI00596027.2  | XIRP1_CHICK    |
| IPI00821165.1  | NP_989541.1    |
| IPI00819902.1  | IPI00819058.1  |
| IPI00577164.3  | IPI00681698.1  |
| NP_001020782.1 | CAZA1_CHICK    |
| XR_026953.1    | IPI00680520.2  |
| IPI00588347.3  | NP_001039306.1 |



|                |                |
|----------------|----------------|
| IPI00575500.2  | IPI00593676.2  |
| IPI00814205.2  | Q2WBI1_CHICK   |
| IPI00589314.3  | PXDNL          |
| IPI00681290.2  | IPI00822052.1  |
| IPI00810781.2  | NP_001029998.1 |
| NP_001012547.1 | IPI00590608.2  |
| IPI00585752.1  | PARP1_CHICK    |
| IPI00572427.3  | XR_026755.1    |
| NP_001026490.1 | IPI00684065.2  |
| FGFR3_CHICK    | IPI00683320.2  |
| IPI00683858.2  | IPI00823170.1  |
| NP_989733.1    | IPI00579011.2  |
| IPI00578060.3  | IPI00580979.2  |
| NP_001026435.1 | IPI00572821.1  |
| EPHA3_CHICK    | NP_001026764.1 |
| VGFR1_CHICK    | IPI00582590.2  |
| NP_001026508.1 | IPI00589670.2  |
| IPI00594674.3  | IPI00813204.2  |
| IPI00582628.1  | Q5ZIM9_CHICK   |
| IPI00573527.3  | IPI00583677.3  |
| NP_001026042.1 | HS90B_CHICK    |
| NP_001006133.1 | NP_989979.1    |
| Q8QGH1_CHICK   | ENPL_CHICK     |
| IPI00595478.3  | IPI00579557.1  |
| IPI00573170.2  | FZD6_CHICK     |
| IPI00598376.2  | SMO_CHICK      |
| NP_001025988.1 | FZD3_CHICK     |
| KC1G1_CHICK    | FZD10_CHICK    |
| EPHA5_CHICK    | FZD1_CHICK     |
| XR_027077.1    | IPI00583166.3  |
| NP_001026111.1 | IPI00820886.1  |
| Q98SN6_CHICK   | NP_001026363.1 |
| TYRO3_CHICK    | IPI00820659.1  |
| IPI00591467.2  | IPI00587190.3  |
| Q5ZL78_CHICK   | CRYAA_CHICK    |
| NP_001034694.1 | IPI00584799.1  |
| IPI00578943.3  | IPI00811415.2  |
| IPI00571400.3  | NP_001005841.1 |
| XR_027075.1    | HSPB1_CHICK    |
| IPI00587876.2  | NP_001007976.1 |
| IPI00599490.2  | IPI00819528.1  |
| IPI00820514.1  | NP_001026053.1 |

|                |                |
|----------------|----------------|
| NP_990201.1    | IPI00822695.1  |
| NP_001006227.1 | IPI00585641.3  |
| Q5ZLJ0_CHICK   | CHD7_CHICK     |
| IPI00582579.3  | ASF1_CHICK     |
| IPI00579085.2  | IPI00598956.2  |
| NP_001025909.1 | NP_001012920.1 |
| IPI00587758.3  | NP_989974.1    |
| Q98SN5_CHICK   | NP_990272.1    |
| IPI00603018.4  | NP_989537.1    |
| IPI00593292.3  | ACAP2_CHICK    |
| NP_990521.1    | SMAP2_CHICK    |
| NP_989626.1    | NP_001012557.1 |
| IPI00822237.2  | IPI00594909.3  |
| IPI00822035.1  | IPI00600935.3  |
| NP_001025941.1 | NP_001025725.1 |
| IPI00575631.2  | LOC776461      |
| IPI00596751.3  | IPI00592666.3  |
| NP_001026372.1 | IPI00594463.3  |
| XR_026673.1    | NM_001004400.2 |
| BRAF1_CHICK    | IPI00575200.3  |
| CHK1_CHICK     | IPI00598915.2  |
| IPI00602834.3  | IPI00592961.3  |
| IPI00818448.1  | TBA2_CHICK     |
| Q90960_CHICK   | IPI00576041.1  |
| IPI00580228.3  | IPI00822232.1  |
| IPI00572424.4  | IPI00603435.3  |
| KCC2D_CHICK    | Q2MHD5_CHICK   |
| IPI00597506.2  | IPI00600743.2  |
| Q8AV70_CHICK   | IPI00593687.3  |
| NP_001026288.1 | TBA4_CHICK     |
| IPI00596668.3  | XR_027195.1    |
| IPI00584639.3  | IPI00590371.3  |
| IPI00582379.2  | IPI00590953.2  |
| IPI00596416.3  | NP_001025793.1 |
| NP_001026568.1 | Q6V1L3_CHICK   |
| BMR1B_CHICK    | IPI00575336.2  |
| IPI00574949.2  | TBA1_CHICK     |
| MK06_CHICK     | IPI00822617.1  |
| IPI00582849.1  | IPI00589956.4  |
| FAK1_CHICK     | IPI00594667.3  |
| IPI00571158.3  | LOC776808      |
| TGFR2_CHICK    | IPI00821841.1  |

|                |                |
|----------------|----------------|
| IPI00818088.1  | TBB3_CHICK     |
| IPI00577961.3  | IPI00684333.2  |
| STRAA_CHICK    | IPI00821488.1  |
| NP_989732.2    | NP_001006320.1 |
| IPI00587675.2  | IPI00586977.4  |
| IPI00683739.3  | IPI00821889.1  |
| IPI00585611.3  | NP_001034355.1 |
| IPI00576002.3  | Q7T191_CHICK   |
| PGFRA_CHICK    | IPI00597302.3  |
| IPI00596551.4  | IPI00592228.3  |
| LOC769294      | IPI00579895.3  |
| NTRK2_CHICK    | IPI00601180.3  |
| IPI00587477.3  | LAP4A_CHICK    |
| UBE2W          | Q5F386_CHICK   |
| XR_026727.1    | IPI00573257.4  |
| IPI00600590.1  | IPI00599306.1  |
| IPI00572628.2  | IPI00594975.3  |
| NP_001005838.1 | IPI00588817.2  |
| IPI00680215.2  | IPI00818234.1  |
| Q5ZLH8_CHICK   | IPI00582494.3  |
| NP_001012828.1 | IPI00819404.1  |
| IPI00681498.2  | NM_204467.1    |
| IPI00572066.2  | IPI00822922.1  |
| NP_001006180.1 | TRPC7          |
| IPI00576435.4  | MFSD1_CHICK    |
| NP_001026711.1 | CAC1B_CHICK    |
| UBC9_CHICK     | KCAB1_CHICK    |
| IPI00593939.1  | IPI00580635.1  |
| IPI00819923.1  | IPI00581435.3  |
| IPI00578886.3  | IPI00598611.1  |
| IPI00818733.1  | Q9DEX2_CHICK   |
| IPI00598641.3  | S35B1_CHICK    |
| IPI00582808.4  | IPI00820629.1  |
| NP_001026306.1 | IPI00599491.3  |
| IPI00572560.3  | LOC416599      |
| NP_001025179.1 | IPI00603425.3  |
| NP_001025792.1 | IPI00822252.1  |
| TOM1_CHICK     | A0M8U4_CHICK   |
| NP_001012914.1 | Q9YH83_CHICK   |
| IPI00584385.2  | IPI00820292.1  |
| IPI00577557.3  | IPI00598119.3  |
| NP_001012877.1 | IPI00595217.2  |

|                |                |
|----------------|----------------|
| RAN_CHICK      | IPI00603440.2  |
| NM_001030621.1 | IPI00596696.1  |
| IPI00577874.1  | IPI00819902.1  |
| XR_026901.1    | NP_001025750.1 |
| NP_001006261.1 | LOC430136      |
| Q5ZKZ1_CHICK   | Q8AV15_CHICK   |
| IPI00578318.2  | IPI00820495.1  |
| NP_001006586.1 | IPI00589286.3  |
| IPI00813364.2  | IPI00571508.3  |
| IPI00602929.3  | IPI00582510.3  |
| IPI00603305.2  | IPI00577173.3  |
| IPI00596397.1  | IPI00586650.2  |
| XPO7_CHICK     | IPI00821160.1  |
| IPI00681387.2  | IPI00819069.1  |
| STAM2_CHICK    | NP_001004409.1 |
| Q5ZIV8_CHICK   | IPI00603919.1  |
| Q5ZMT6_CHICK   | XR_026692.1    |
| IPI00604093.1  | IPI00571180.3  |
| IPI00584954.1  | NP_989903.1    |
| IPI00586708.3  | Q9W6Q6_CHICK   |
| XR_027204.1    | NP_996757.1    |
| SPN1_CHICK     | O42421_CHICK   |
| IPI00596855.3  | GTR3_CHICK     |
| IPI00584207.3  | NP_989657.1    |
| IPI00572599.2  | NP_001012967.1 |
| LOC769161      | B9VMA9_CHICK   |
| IPI00572136.3  | IPI00821254.1  |
| IPI00593619.2  | IPI00578369.2  |
| XR_026868.1    | IPI00823435.1  |
| NP_001026290.1 | IPI00589034.2  |
| IPI00588757.3  | CAC1C_CHICK    |
| IPI00598430.2  | IPI00573170.2  |
| NP_001025780.1 | IPI00684904.2  |
| NP_001026088.1 | IPI00587021.3  |
| IPI00596524.2  | IPI00598220.3  |
| XR_027190.1    | IPI00600977.2  |
| NP_989710.1    | NP_001006236.1 |
| Q6X3Y9_CHICK   | LOC776399      |
| NP_989484.1    | Q8AV27_CHICK   |
| IPI00589837.2  | IPI00600831.3  |
| HB2L_CHICK     | IPI00599050.2  |
| IPI00819331.1  | IPI00604213.3  |

|                |                |
|----------------|----------------|
| IPI00822732.1  | B5G557_CHICK   |
| NP_990372.1    | NP_001029041.1 |
| Q9DGH8_CHICK   | IPI00579185.1  |
| NP_989902.1    | O42418_CHICK   |
| NP_989717.1    | IPI00571830.2  |
| A5HUL8_CHICK   | IPI00592966.3  |
| IPI00588912.2  | Q9YGQ9_CHICK   |
| NP_989959.1    | IPI00575434.2  |
| NP_989740.1    | Q5ZKG6_CHICK   |
| NP_001007080.1 | NP_990072.1    |
| IPI00604344.2  | IPI00571078.3  |
| IPI00578232.1  | NCKX1_CHICK    |
| RAB10_CHICK    | IPI00683221.2  |
| IPI00586006.3  | IPI00578166.3  |
| IPI00577052.2  | IPI00579948.2  |
| MIRO2_CHICK    | SPX3_CHICK     |
| IPI00572853.2  | IPI00584476.2  |
| IPI00592157.2  | XR_027154.1    |
| IPI00813592.2  | IPI00819156.1  |
| IPI00591419.2  | MRP1_CHICK     |
| NP_001025831.1 | Q8AY19_CHICK   |
| GLI3_CHICK     | IPI00579342.3  |
| IPI00585089.1  | ARHG6_CHICK    |
| XR_026953.1    | Q5ZJC0_CHICK   |
| IPI00581726.2  | IPI00575349.3  |
| IPI00579307.3  | IPI00587973.2  |
| IPI00590321.1  | IPI00586607.2  |
| IPI00822164.1  | IPI00601481.3  |
| Q5F337_CHICK   | IPI00580588.2  |
| NP_989792.1    | NP_001025819.1 |
| IPI00601852.2  | IPI00596688.3  |
| Q90YX6_CHICK   | NP_001010841.1 |
| RHOC_CHICK     | IPI00586462.3  |
| ARL8A_CHICK    | IPI00582840.2  |
| CDC42_CHICK    | IPI00599886.3  |
| IPI00819159.1  | IPI00580739.3  |
| RAB6A_CHICK    | IPI00580030.3  |
| NP_001026498.1 | NP_001025536.1 |
| NM_205017.1    | Q9PT87_CHICK   |
| IPI00810723.2  | KIT_CHICK      |
| IPI00603978.1  | IPI00821165.1  |
| IPI00577366.2  | EPHA3_CHICK    |

|                |                |
|----------------|----------------|
| IPI00580160.2  | IPI00819162.1  |
| RABL3_CHICK    | Q91015_CHICK   |
| XR_026673.1    | EPHA5_CHICK    |
| IPI00601244.1  | Q8AV70_CHICK   |
| ARF5_CHICK     | NTRK2_CHICK    |
| IPI00594309.3  | PGFRA_CHICK    |
| IPI00576555.1  | IPI00814048.2  |
| IPI00573678.2  | AT2B1_CHICK    |
| NP_001012590.1 | IPI00571180.3  |
| IPI00822572.1  | Q9W6Q6_CHICK   |
| IPI00602093.1  | IPI00593562.2  |
| XR_027123.1    | IPI00587053.2  |
| NP_001006207.1 | IPI00579948.2  |
| IPI00597909.1  | AT2A2_CHICK    |
| DICER_CHICK    | IPI00597186.2  |
| IPI00598672.2  | IPI00599427.2  |
| IPI00571045.3  | CASP2_CHICK    |
| Q5ZIT4_CHICK   | NP_001038154.1 |
| IPI00598251.3  | Q90WU0_CHICK   |
| IPI00591557.2  | IPI00597741.3  |
| NP_989911.1    | Q9W6F1_CHICK   |
| IPI00580554.2  | IPI00582379.2  |
| NP_001030000.1 | IPI00574950.3  |
| IPI00579410.4  | XR_026722.1    |
| IPI00822376.1  | IPI00591557.2  |
| NP_001026505.1 | IPI00823339.1  |
| IPI00822637.1  | Q5ZI29_CHICK   |
| IPI00575056.1  | DHSA_CHICK     |
| IPI00820185.1  | NP_001026001.1 |
| NP_001012879.1 | IPI00593517.1  |
| IPI00821103.1  | IPI00682714.2  |
| NP_989849.1    | XR_027204.1    |
| IPI00572844.3  | XR_026708.1    |
| IPI00819262.1  | IPI00588757.3  |
| NP_989848.1    | IPI00580186.3  |
| IPI00572549.1  | IPI00602002.2  |
| NP_001012577.1 | IPI00577577.3  |
| IPI00586871.1  | XR_027198.1    |
| IPI00594378.3  | IPI00819020.1  |
| SEPT2_CHICK    | PA24A_CHICK    |
| IPI00576004.3  | IPI00576464.3  |
| NP_001025825.1 | NP_996864.1    |

|                |                |
|----------------|----------------|
| NP_001026296.1 | NP_001025899.1 |
| IPI00683568.2  | IPI00602611.3  |
| IPI00578880.1  | NP_001026484.1 |
| IPI00819156.1  | SPY2_CHICK     |
| Q8AY19_CHICK   | IPI00822337.1  |
| IPI00600162.2  | IPI00820913.1  |
| IPI00814048.2  | HIRA_CHICK     |
| CAC1B_CHICK    | Q6X3Y9_CHICK   |
| AT2A2_CHICK    | XR_027190.1    |
| TRPC7          | HB2L_CHICK     |
| Q9DEX2_CHICK   | IPI00822732.1  |
| Q9YH83_CHICK   | A5HUL8_CHICK   |
| AT2B1_CHICK    | MYBB_CHICK     |
| IPI00820292.1  | IPI00820062.1  |
| NP_001004409.1 | NP_989568.1    |
| NP_996757.1    | NP_001026530.1 |
| CAC1C_CHICK    | XR_027180.1    |
| NP_989463.1    | IPI00818817.1  |
| IPI00818851.1  | NP_001007947.1 |
| IPI00587053.2  | IPI00823375.1  |
| IPI00592966.3  | IPI00589002.1  |
| IPI00680945.2  | TAD2A_CHICK    |
| O42347_CHICK   | IPI00598956.2  |
| SEM3E_CHICK    | IPI00572917.2  |
| IPI00596873.3  | IPI00820922.1  |
| SEM3C_CHICK    | POLR2L         |
| Q9DEC9_CHICK   | IPI00597464.4  |
| NP_990006.1    | MYSM1_CHICK    |
| IPI00602611.3  | IPI00581796.3  |
| NP_001032346.1 | IPI00588780.3  |
| NP_001032351.1 | LOC425967      |
| Q3L248_CHICK   | IPI00820822.1  |
| IPI00591458.2  | IPI00820399.1  |
| SEM4D_CHICK    | IPI00822104.1  |
| PITX1_CHICK    | NP_990124.1    |
| RX1_CHICK      | IPI00581170.3  |
| IPI00822726.1  | NP_989755.1    |
| NP_989667.1    | IPI00818020.1  |
| IPI00588048.1  | IPI00582485.3  |
| SPY2_CHICK     | IPI00590108.3  |
| IPI00822237.2  | IPI00821485.1  |
| IPI00604365.3  | IPI00573333.2  |

|                |                |
|----------------|----------------|
| LDB1_CHICK     | IPI00598838.3  |
| Q3L250_CHICK   | IPI00811256.2  |
| PROX1_CHICK    | PAX9_CHICK     |
| IPI00582719.3  | IPI00681690.2  |
| LDB2_CHICK     | IPI00589286.3  |
| Q8JHZ7_CHICK   | IPI00571950.3  |
| WNT9A_CHICK    | IPI00575965.1  |
| CRY2_CHICK     | POTE1_CHICK    |
| NP_989514.1    | NP_989607.1    |
| Q5ZJP8_CHICK   | IPI00586551.3  |
| CRY1_CHICK     | NP_001006389.1 |
| NP_989607.1    | Q91015_CHICK   |
| IPI00820410.1  | CRIM1_CHICK    |
| IPI00579558.3  | Q5ZI90_CHICK   |
| RAD51_CHICK    | IPI00581162.3  |
| XR_026809.1    | G3P_CHICK      |
| IPI00572701.2  | NP_001025728.1 |
| IPI00573333.2  | XR_027032.1    |
| BLM_CHICK      | IPI00591196.2  |
| IPI00818388.1  | NP_001026323.1 |
| ITA1_CHICK     | IPI00821707.1  |
| Q6V0P4_CHICK   | NP_001032348.1 |
| IPI00598938.3  | IPI00592525.3  |
| CAD13_CHICK    | NP60_CHICK     |
| ITA6_CHICK     | NP_001006502.1 |
| TSP2_CHICK     | IPI00577906.1  |
| IPI00598904.3  | IPI00576005.2  |
| NP_001025954.1 | IPI00596046.3  |
| NEL_CHICK      | IPI00821264.1  |
| IPI00594966.2  | IPI00603973.4  |
| NP_989495.1    | FANCJ_CHICK    |
| Q9YGQ6_CHICK   | IPI00819732.1  |
| Q91415_CHICK   | IPI00593059.1  |
| IPI00581215.3  | IPI00579558.3  |
| IPI00601647.3  | NP_001006451.1 |
| Q9YGR4_CHICK   | IPI00573852.2  |
| Q6V0P5_CHICK   | NP_001026692.1 |
| CO9A1_CHICK    | IPI00822678.1  |
| Q91015_CHICK   | IPI00822678.1  |
| Q804X4_CHICK   | Q5ZMV6_CHICK   |
| IPI00594139.2  | NP_001026253.1 |
| TYRO3_CHICK    | NP_001026308.1 |



|                |                |
|----------------|----------------|
| COCA1_CHICK    | NP_001006550.1 |
| NCAM1_CHICK    | Q9DEI0_CHICK   |
| IPI00588351.3  | IPI00570850.2  |
| IPI00586914.3  | IPI00593118.1  |
| IPI00820415.1  | DNA2L_CHICK    |
| NP_001008459.1 | BLM_CHICK      |
| IPI00600729.3  | NP_001006456.1 |
| A6YJX3_CHICK   | DPOE2_CHICK    |
| Q6R0I0_CHICK   | NP_001006181.1 |
| Q6R0H8_CHICK   | NP_001026308.1 |
| IPI00579481.2  | PCNA_CHICK     |
| Q9YGQ9_CHICK   | NP_001026178.1 |
| CADH6_CHICK    | NP_990024.1    |
| IPI00579675.2  | IPI00821549.1  |
| IPI00592078.2  | IPI00592615.3  |
| NP_001039292.1 | XR_027212.1    |
| IPI00588122.2  | XR_026668.1    |
| CTNA2_CHICK    | IPI00822608.1  |
| VINC_CHICK     | IPI00594951.3  |
| ITAV_CHICK     | MRE11_CHICK    |
| Q6R0I1_CHICK   | NP_989616.1    |
| Q6V0P1_CHICK   | NP_989607.1    |
| Q90796_CHICK   | BLM_CHICK      |
| CADH1_CHICK    | IPI00822162.1  |
| IPI00683898.2  | IPI00821036.1  |
| IPI00679350.2  | NP_001006387.1 |
| NP_001026448.1 | IPI00596200.1  |
| IPI00590518.2  | NP_001006387.1 |
| IPI00819700.1  | XR_027012.1    |
| IPI00820436.1  | IPI00597194.3  |
| IPI00812156.2  | IPI00591892.2  |
| MRE11_CHICK    | IPI00573277.2  |
| IPI00572549.1  | NP_001026273.1 |
| IPI00599306.1  | NP_001026378.1 |
| IPI00811977.2  | IPI00604168.3  |
| IPI00575771.3  | IPI00583886.2  |
| IPI00812061.1  | IPI00588415.1  |
| IPI00602335.3  | IPI00586261.2  |
| Q9PUI8_CHICK   | NP_001026227.1 |
| IPI00578369.2  | IPI00597775.1  |
| GBRG2_CHICK    | IPI00587216.3  |
| Q5ZIV4_CHICK   | IPI00587216.3  |

|                |                |
|----------------|----------------|
| IPI00821707.1  | SYCC_CHICK     |
| IPI00600071.3  | IPI00812698.2  |
| NP_001032348.1 | NP_001026681.1 |
| NP_001025814.1 | NP_001006144.1 |
| IPI00595677.2  | IPI00592258.2  |
| IPI00580632.3  | NP_001025754.1 |
| NP_990221.1    | NP_001026618.1 |
| IPI00598167.3  | IPI00586842.1  |
| IPI00820880.1  | IF5A2_CHICK    |
| IPI00581980.3  | IPI00594164.2  |
| IPI00819571.1  | NP_001005802.1 |
| IPI00574970.2  | NP_001006298.1 |
| XR_027198.1    | IPI00580971.2  |
| O93586_CHICK   | IPI00592455.3  |
| CATL1_CHICK    | IPI00594760.1  |
| IPI00683486.2  | Q5ZIX9_CHICK   |
| IPI00593121.2  | GCSP_CHICK     |
| Q75W80_CHICK   | GCSP_CHICK     |
| Q788Q2_CHICK   | IPI00577411.1  |
| IPI00587812.2  | IPI00586982.2  |
| XR_026893.1    | IPI00579350.3  |
| IPI00602573.3  | IPI00575843.1  |
| IPI00599900.3  | NP_001025974.1 |
| NP_001025528.1 | IPI00597595.2  |
| IPI00596075.2  | IPI00584385.2  |
| IPI00594977.2  | IPI00591857.3  |
| NP_001026507.1 | SPN1_CHICK     |
| Q9PT87_CHICK   | IPI00818733.1  |
| IPI00599675.2  | IPI00595042.1  |
| Q5ZK89_CHICK   | IPI00593517.1  |
| Q5QHS0_CHICK   | IPI00585331.3  |
| IPI00595126.3  | Q5ZMD8_CHICK   |
| IPI00597186.2  | IPI00578808.3  |
| IPI00575822.3  | PHS2_CHICK     |
| IPI00573750.2  | IPI00821761.1  |
| NP_001026683.1 | HEMH_CHICK     |
| IPI00821811.1  | SODC_CHICK     |
| IPI00818613.1  | NOS2_CHICK     |
| IPI00573332.2  | IPI00822117.1  |
| IPI00575762.3  | IPI00585469.3  |
| NP_001005802.1 | IPI00811126.1  |
| Q5ZKL3_CHICK   | NP_001012917.1 |

|                |                |
|----------------|----------------|
| IPI00580247.3  | Q9IAS3_CHICK   |
| CASP2_CHICK    | IPI00597270.1  |
| IPI00820111.1  | IPI00590384.3  |
| IPI00588768.3  | IPI00583651.3  |
| IPI00819331.1  | IPI00579058.1  |
| IPI00603980.3  | IPI00572599.2  |
| NP_001038154.1 | IPI00601567.3  |
| IPI00604346.1  | IPI00683274.2  |
| IPI00821288.1  | IPI00598611.1  |
| TRY2_CHICK     | NP_001025750.1 |
| IPI00583927.3  | IPI00589610.3  |
| CAN2_CHICK     | NP_996757.1    |
| IPI00576308.1  | Q5ZJA5_CHICK   |
| IPI00819302.1  | FRIH_CHICK     |
| IPI00603559.2  | NP_990538.1    |
| IPI00574554.2  | NP_001012820.1 |
| Q90WU0_CHICK   | NP_001026306.1 |
| IPI00583043.3  | NP_001006320.1 |
| NP_001006385.1 | IPI00584954.1  |
| O93363_CHICK   | Q90765_CHICK   |
| IPI00596756.3  | BECN1_CHICK    |
| IPI00590280.2  | CALD1_CHICK    |
| IPI00602580.4  | IPI00847062.1  |
| IPI00579987.2  | NP_001026326.1 |
| IPI00592378.3  | IPI00586551.3  |
| IPI00585115.1  | IPI00820719.1  |
| IPI00585847.3  | IPI00588496.3  |
| IPI00820386.1  | IPI00585380.3  |
| NP_990544.1    | IPI00819403.1  |
| IPI00684448.2  | IPI00594950.3  |
| NP_001019746.1 | IPI00570986.2  |
| NP_998751.1    | NP_989607.1    |
| NP_989915.1    | CADH1_CHICK    |
| IPI00581140.3  | Q6V0P4_CHICK   |
| IPI00588781.2  | CAD13_CHICK    |
| NP_989772.1    | Q9DDD3_CHICK   |
| IPI00821300.1  | Q9YGQ6_CHICK   |
| LOC423941      | IPI00581215.3  |
| IPI00572749.3  | Q9YGR4_CHICK   |
| IPI00812503.2  | Q6V0P5_CHICK   |
| IPI00819885.1  | NP_990521.1    |
| IPI00819244.1  | A6YJX3_CHICK   |

|                |                |
|----------------|----------------|
| GARL3_CHICK    | IPI00680581.2  |
| IPI00595342.3  | Q6R0I0_CHICK   |
| IPI00820946.1  | Q6R0H8_CHICK   |
| IPI00586607.2  | Q9YGQ9_CHICK   |
| IPI00679865.2  | CADH6_CHICK    |
| NP_001026442.1 | Q6R0I1_CHICK   |
| IPI00582549.4  | NP_001039292.1 |
| NF1_CHICK      | Q6V0P1_CHICK   |
| IPI00823417.1  | XR_027037.1    |
| IPI00603663.2  | Q91415_CHICK   |
| XR_027072.1    | IPI00586914.3  |
| IPI00583672.3  | IPI00680879.2  |
| IPI00588554.3  | IPI00595617.2  |
| IPI00582840.2  | IPI00599567.2  |
| IPI00600532.3  | IPI00822459.1  |
| Q5F3V4_CHICK   | NP_001026242.1 |
| NP_001026390.1 | IPI00595390.2  |
| IPI00595657.2  | Q5J7V0_CHICK   |
| NP_990221.1    | IPI00594712.3  |
| IPI00822349.1  | Q9YGQ9_CHICK   |
| NP_990816.1    | XR_027090.1    |
| IPI00596551.4  | Q91415_CHICK   |
| IPI00576418.2  | IPI00586914.3  |
| IPI00583166.3  | IPI00581795.2  |
| IPI00589384.3  | SPINZ_CHICK    |
| IPI00579342.3  | IPI00682552.2  |
| STMN2_CHICK    | NP_989739.1    |
| IPI00600071.3  | IPI00598916.2  |
| IPI00575349.3  | NP_001012949.1 |
| ARHG6_CHICK    | SAT1_CHICK     |
| IPI00596330.2  | IPI00593233.3  |
| IPI00820886.1  | NP_001025728.1 |
| IPI00587022.3  | IPI00571235.3  |
| IPI00583699.1  | XR_027152.1    |
| NP_001026363.1 | IPI00596042.3  |
| IPI00594255.2  | API5_CHICK     |
| IPI00598794.2  | IPI00819675.1  |
| IPI00577164.3  | LOC776105      |
| NP_990203.1    | IPI00580338.3  |
| IPI00577693.3  | IPI00584421.3  |
| IPI00820659.1  | IPI00818371.1  |
| IPI00602356.2  | IPI00819020.1  |

|                |                |
|----------------|----------------|
| IPI00582549.4  | ACOC_CHICK     |
| NP_001026490.1 | IPI00570827.1  |
| IPI00596688.3  | NP_001026053.1 |
| IPI00592419.3  | IPI00581886.3  |
| IPI00587034.1  | IPI00584832.3  |
| NP_001006133.1 | IPI00592113.2  |
| IPI00574944.3  | IPI00814180.2  |
| NP_001025819.1 | IPI00819440.1  |
| STMN1_CHICK    | O93363_CHICK   |
| Q98SN6_CHICK   | PA24A_CHICK    |
| IPI00821902.1  | NP_001006385.1 |
| IPI00603962.3  | IPI00585847.3  |
| IPI00592526.3  | IPI00820386.1  |
| IPI00596984.2  | IPI00584061.2  |
| NP_001026601.1 | IPI00818816.1  |
| IPI00596422.2  | IPI00578405.3  |
| NP_989962.1    | NP_001006578.2 |
| IPI00582579.3  | GSTA2_CHICK    |
| IPI00590422.3  | IPI00587689.1  |
| NP_001006390.1 | IPI00594164.2  |
| IPI00580632.3  | IPI00589655.1  |
| IPI00587190.3  | IF5A2_CHICK    |
| IPI00582840.2  | IPI00586982.2  |
| IPI00576389.4  | IPI00600585.3  |
| IPI00593292.3  | NP_001001301.1 |
| Q98SN5_CHICK   | IPI00594760.1  |
| NP_001026372.1 | IPI00601144.1  |
| IPI00581980.3  | Q5ZIX9_CHICK   |
| IPI00592402.3  | IPI00819871.1  |
| IPI00590903.4  | IPI00576005.2  |
| BRAF1_CHICK    | PRPS2_CHICK    |
| IPI00579857.1  | IPI00596630.1  |
| XR_027198.1    | IPI00577839.1  |
| Q5F3V4_CHICK   | PRPS2_CHICK    |
| IPI00580030.3  | IPI00596630.1  |
| NP_989666.1    | NP_001025718.1 |
| IPI00602518.3  | IPI00602356.2  |
| IPI00574970.2  | IPI00592526.3  |
| GLL7_CHICK     | NP_989962.1    |
| IFNA3_CHICK    | IPI00593770.1  |
| IPI00597741.3  | ERP29_CHICK    |
| IPI00592671.1  | PSME3_CHICK    |

|                |                |
|----------------|----------------|
| IPI00572674.2  | IPI00598371.3  |
| XR_027181.1    | IPI00683045.1  |
| NP_989914.1    | NP_001006389.1 |
| IPI00591919.1  | IPI00682509.2  |
| IPI00595277.3  | NP_001025942.1 |
| IPI00586396.1  | IPI00571346.1  |
| NP_989805.1    | IPI00680502.3  |
| NP_001012580.1 | IPI00579585.3  |
| XR_026841.1    | IPI00819611.1  |
| NP_001026304.1 | IPI00821995.1  |
| IPI00588800.3  | IPI00580880.2  |
| IPI00588418.3  | IPI00820109.1  |
| IPI00596433.3  | NP_001026167.1 |
| IPI00577372.3  | IPI00822283.1  |
| IPI00818548.1  | NP_989816.1    |
| XR_026754.1    | IPI00599653.3  |
| IPI00604234.3  | IPI00593511.2  |
| IPI00591077.3  | IPI00590995.2  |
| RS15_CHICK     | TAF3_CHICK     |
| IPI00574602.2  | IPI00601501.3  |
| IPI00599862.2  | IPI00593935.2  |
| SYCC_CHICK     | IPI00580182.1  |
| RL30_CHICK     | IPI00594088.1  |
| IPI00603744.2  | VPP1_CHICK     |
| RL35_CHICK     | VATB_CHICK     |
| IPI00572512.1  | NP_989617.1    |
| Q6EE61_CHICK   | IPI00588938.1  |
| IPI00589221.2  | NP_001028816.1 |
| RS27A_CHICK    | IPI00590522.1  |
| NP_001026100.1 | PAFA_CHICK     |
| RS13_CHICK     | TGFB2_CHICK    |
| IPI00598304.2  | TGFB3_CHICK    |
| RM37_CHICK     | IPI00820145.1  |
| IPI00811129.1  | IPI00588858.2  |
| IPI00586190.2  | IPI00577942.3  |
| RL37A_CHICK    | IPI00589597.2  |
| Q98TF9_CHICK   | IPI00594818.3  |
| PELO_CHICK     | IPI00595603.1  |
| IPI00572788.1  | Q5F446_CHICK   |
| RS4_CHICK      | NCOA7_CHICK    |
| IPI00679673.2  | IPI00576281.1  |
| NP_001026227.1 | IPI00591205.1  |

|                |                |
|----------------|----------------|
| RL26_CHICK     | DPH2_CHICK     |
| RL7_CHICK      | LOC776686      |
| IPI00598672.2  | IPI00821813.1  |
| IPI00580519.1  | IPI00847048.1  |
| RL39_CHICK     | IPI00600705.1  |
| NP_001006241.1 | NP_001026639.1 |
| NP_001026075.1 | NP_996864.1    |
| IPI00597958.3  | Q5ZK89_CHICK   |
| NP_001026007.1 | IPI00570838.2  |
| NP_001035503.1 | GCSH_CHICK     |
| IPI00682237.2  | IPI00681843.1  |
| IPI00819932.1  | IPI00820140.1  |
| IPI00822922.1  | IPI00595373.3  |
| IPI00592126.2  | IPI00601901.2  |
| IPI00573257.4  | IPI00593376.1  |
| KCAB1_CHICK    | Q9DEC9_CHICK   |
| IPI00588817.2  | IPI00590849.2  |
| IPI00581191.3  | IPI00600757.3  |
| IPI00574468.3  | XR_027181.1    |
| IPI00574526.2  | IPI00822433.1  |
| IPI00820101.1  | IPI00574267.4  |
| IPI00590944.2  | IPI00682607.2  |
| NP_989749.1    | IPI00573965.3  |
| LOC430136      | IPI00820707.1  |
| O42508_CHICK   | RRMJ3_CHICK    |
| IPI00589286.3  | IPI00587903.2  |
| IPI00883188.1  | IPI00583911.3  |
| IPI00571508.3  | IPI00600577.2  |
| IPI00594138.1  | IPI00578132.3  |
| Q5ZLI4_CHICK   | RBG1L_CHICK    |
| NP_989657.1    | Q5ZMK6_CHICK   |
| AT1B1_CHICK    | IPI00598715.2  |
| IPI00594219.1  | IPI00600450.3  |
| IPI00821254.1  | IPI00810892.2  |
| NP_001038116.1 | NP_001026011.1 |
| IPI00587021.3  | LOC768562      |
| LOC429723      | IPI00599518.2  |
| IPI00570900.2  | IPI00579593.3  |
| IPI00576169.3  | IPI00577808.3  |
| IPI00599050.2  | IPI00586533.2  |
| IPI00574389.1  | IPI00821761.1  |
| IPI00573547.3  | NEUM_CHICK     |

|                |                |
|----------------|----------------|
| IPI00579185.1  | IPI00812943.2  |
| XR_026889.1    | IPI00589610.3  |
| IPI00588354.1  | IPI00684160.2  |
| XR_027154.1    | IPI00683898.2  |
| IPI00600568.2  | IPI00600575.3  |
| IPI00596200.1  | IPI00683580.2  |
| IPI00589574.3  | NP_001001301.1 |
| IPI00589137.3  | ARLY2_CHICK    |
| NP_001006448.1 | NP_001026227.1 |
| IPI00820874.1  | Q9PVL2_CHICK   |
| IPI00578643.1  | NP_001026290.1 |
| IPI00684089.1  | IPI00593403.3  |
| IPI00578749.2  | IPI00574302.1  |
| IPI00595896.2  | IPI00820385.1  |
| O73841_CHICK   | NP_001026484.1 |
| IPI00820385.1  | PRPS2_CHICK    |
| IPI00577405.2  | IPI00573434.1  |
| IPI00580368.2  | IPI00680633.1  |
| Q5ZLM6_CHICK   | IPI00595304.2  |
| IPI00579063.1  | NP_001034693.1 |
| IPI00572554.1  | IF5A2_CHICK    |
| NP_001006281.1 | IF5A2_CHICK    |
| IPI00597762.1  | IPI00578781.1  |
| IPI00604003.3  | IPI00582433.3  |
| Q90750_CHICK   | IPI00587336.1  |
| NP_001008789.1 | XR_026853.1    |
| IPI00575822.3  | IPI00819350.1  |
| IPI00821288.1  | IPI00582397.3  |
| IPI00579948.2  | NP_001025728.1 |
| IPI00811057.2  | IPI00597631.2  |
| IPI00584637.3  | NP_001004410.1 |
| IPI00590401.2  | NP_001006578.2 |
| IPI00819684.1  | MIRO2_CHICK    |
| IPI00682833.1  | NP_990363.1    |
| IPI00818474.1  | NP_989691.1    |
| IPI00683486.2  | IPI00597631.2  |
| NP_001026683.1 | NP_001004410.1 |
| PRS4_CHICK     | NP_001012969.1 |
| NP_001006225.1 | Q9DEC9_CHICK   |
| NP_001006494.1 | ANXA5_CHICK    |
| NP_001026361.1 | IPI00577751.1  |
| AT2A2_CHICK    | IPI00821872.1  |



|                |                |
|----------------|----------------|
| IPI00814048.2  | SMC5_CHICK     |
| IPI00819611.1  | IPI00592666.3  |
| NP_989749.1    | IPI00575200.3  |
| IPI00821995.1  | NM_001004400.2 |
| IPI00580880.2  | TBA2_CHICK     |
| IPI00820109.1  | IPI00599285.3  |
| AT2B1_CHICK    | TBA4_CHICK     |
| NP_001026167.1 | TBA1_CHICK     |
| AT1B1_CHICK    | TBB3_CHICK     |
| NP_001038116.1 | IPI00823339.1  |
| NP_001026052.1 | NP_001025772.1 |
| IPI00587053.2  | KCAB1_CHICK    |
| IPI00593562.2  | CP17A_CHICK    |
| IPI00822283.1  | IPI00819230.1  |
| IPI00822117.1  | IPI00819650.1  |
| IPI00570706.3  | IPI00587812.2  |
| Q8AYP9_CHICK   | IPI00818136.1  |
| IPI00580338.3  | IPI00596674.2  |
| NP_989543.1    | IPI00570838.2  |
| NP_001006128.1 | IPI00572932.3  |
| KPYK_CHICK     | IPI00603009.3  |
| NP_989432.1    | Q2WBI1_CHICK   |
| LDHA_CHICK     | ACD11_CHICK    |
| IPI00574366.3  | G3P_CHICK      |
| IPI00584839.3  | FRIH_CHICK     |
| IPI00821466.1  | IOD3_CHICK     |
| IPI00592592.3  | P4HA1_CHICK    |
| NP_001034359.1 | IPI00590263.3  |
| PIGM_CHICK     | IPI00823200.1  |
| IPI00604182.2  | IPI00820140.1  |
| IPI00819794.1  | Q5ZI29_CHICK   |
| IPI00603017.2  | NP_001026173.1 |
| IPI00684277.1  | IPI00593182.3  |
| IPI00589653.3  | LOC776686      |
| IPI00593042.1  | IPI00576072.2  |
| IPI00819543.1  | NP_989910.1    |
| IPI00592918.3  | IPI00588258.1  |
| IPI00679931.2  | NP_001025970.1 |
| PRDX6_CHICK    | IPI00576752.1  |
| IPI00584442.2  | IPI00818809.1  |
| IPI00682783.2  | IPI00599090.4  |
| IPI00603388.4  | IPI00680586.2  |

|                |                |
|----------------|----------------|
| NP_001026581.1 | PXDNL          |
| NHLC2_CHICK    | NP_989634.1    |
| Q5F472_CHICK   | IPI00822678.1  |
| H11L_CHICK     | PSME3_CHICK    |
| H2B1_CHICK     | NP60_CHICK     |
| H2AY_CHICK     | NP_001025801.1 |
| H2A4_CHICK     | IPI00586982.2  |
| H2AZ_CHICK     | NP_001025731.1 |
| IPI00575038.3  | NP_001001301.1 |
| H4_CHICK       | Q5ZM68_CHICK   |
| H2B5_CHICK     | IPI00819543.1  |
| H2AJ_CHICK     | IPI00575843.1  |
| IPI00582485.3  | Q804X4_CHICK   |
| IPI00582392.1  | NP_001026323.1 |
| H32_CHICK      | IPI00821374.1  |
| IPI00593450.3  | IPI00598031.3  |
| NP_989842.1    | SODC_CHICK     |
| Q5TIL8_CHICK   | NP_001006136.1 |
| NP_001026684.1 | IPI00593517.1  |
| NP_001025989.1 | XDH_CHICK      |
| Q6ZYP0_CHICK   | IPI00574953.3  |
| IPI00820237.1  | IPI00593019.3  |
| NP_001026658.1 | Q5ZLS9_CHICK   |
| IPI00583912.1  | NP_001025966.1 |
| NP_990339.1    | CP1A4_CHICK    |
| IPI00573090.3  | IPI00822448.1  |
| Q5QQ39_CHICK   | Q5ZHU7_CHICK   |
| IPI00600935.3  | AL1A1_CHICK    |
| NP_001012590.1 | GCSP_CHICK     |
| Q9DEQ8_CHICK   | Q5MQR0_CHICK   |
| B1B565_CHICK   | XR_026694.1    |
| IPI00600071.3  | IPI00595228.3  |
| IPI00589384.3  | NP_989816.1    |
| IPI00575349.3  | XR_026853.1    |
| RHG15_CHICK    | IPI00820230.1  |
| IPI00591811.3  | IPI00593755.1  |
| IPI00578610.3  | NP_990221.1    |
| NFKB1_CHICK    | LDHA_CHICK     |
| IPI00586048.3  | IPI00579957.1  |
| IPI00821531.1  | IPI00579350.3  |
| IPI00587022.3  | IPI00590366.3  |
| IPI00593231.3  | IPI00598301.2  |

|                |                |
|----------------|----------------|
| IPI00820946.1  | IPI00584645.1  |
| UNC5C_CHICK    | IPI00822433.1  |
| IPI00573855.1  | IPI00581141.3  |
| IPI00591419.2  | IPI00582397.3  |
| IPI00822692.1  | IPI00822052.1  |
| IPI00585441.2  | IPI00599576.2  |
| IPI00578474.1  | DHSA_CHICK     |
| LOC769442      | IPI00601047.3  |
| IPI00594148.3  | HPGD           |
| IPI00598277.3  | NP_001006539.1 |
| RAN_CHICK      | IPI00813416.2  |
| NP_001026055.1 | CP2H1_CHICK    |
| KAP0_CHICK     | NOS2_CHICK     |
| IPI00822349.1  | ADH1_CHICK     |
| IPI00812213.1  | FAS_CHICK      |
| GLI3_CHICK     | XR_027146.1    |
| NP_001026442.1 | Q9PVL2_CHICK   |
| Q98946_CHICK   | Q9I8T6_CHICK   |
| IPI00571290.2  | BMP4_CHICK     |
| IPI00591456.3  | NP_001026578.1 |
| IPI00572578.2  | IPI00574247.2  |
| IPI00819040.1  | PSA1_CHICK     |
| IPI00810781.2  | NP_001025961.1 |
| IPI00583262.3  | IPI00599101.1  |
| IPI00579307.3  | IPI00581182.4  |
| Q90717_CHICK   | NP_989685.1    |
| IPI00601852.2  | Q90947_CHICK   |
| IPI00578103.2  | IPI00819764.1  |
| IPI00823338.1  | Q9PSC7_CHICK   |
| IPI00580275.3  | NP_001026240.1 |
| NP_989733.1    | NP_989748.1    |
| IPI00600847.3  | IPI00812448.2  |
| NP_001026746.1 | IPI00589207.2  |
| IPI00823417.1  | NP_989453.1    |
| IPI00582549.4  | IPI00587481.4  |
| IPI00813205.2  | IPI00598546.3  |
| NP_001026517.1 | IPI00588538.3  |
| NF1_CHICK      | IPI00821671.1  |
| IPI00595478.3  | IPI00685014.2  |
| NP_001026396.1 | IPI00681062.2  |
| NP_989717.1    | IPI00587429.3  |
| 2ABD_CHICK     | IPI00581980.3  |

|                |                |
|----------------|----------------|
| TEN1_CHICK     | IPI00572538.4  |
| Q98SN6_CHICK   | IPI00588638.3  |
| IPI00575093.1  | NP_001026057.1 |
| Q9DGH8_CHICK   | IPI00819991.1  |
| IPI00598376.2  | NP_001025775.1 |
| IPI00822290.1  | IPI00591902.2  |
| IPI00820388.1  | FAS_CHICK      |
| IPI00821008.1  | XR_027102.1    |
| Q802E5_CHICK   | PUR2_CHICK     |
| IPI00820370.1  | IPI00587812.2  |
| IPI00596984.2  | IPI00576564.3  |
| NP_001026498.1 | XR_027124.1    |
| LOC429923      | IPI00573009.3  |
| IPI00583672.3  | IPI00576464.3  |
| IPI00810723.2  | IPI00594760.1  |
| IPI00585593.3  | IPI00582476.2  |
| IPI00603978.1  | IPI00821761.1  |
| IPI00580632.3  | NP_001026451.1 |
| IPI00579856.3  | IPI00589694.1  |
| NP_990816.1    | IPI00570829.3  |
| ANGPTL5        | Q9I9L4_CHICK   |
| NP_001026125.1 | IPI00577509.1  |
| NP_001025909.1 | IPI00812213.1  |
| IPI00587190.3  | KAP0_CHICK     |
| IPI00599632.1  | IPI00599632.1  |
| Q98SN5_CHICK   | NP_989760.1    |
| IPI00571872.3  | XR_026654.1    |
| NP_001004410.1 | IPI00597610.2  |
| IPI00585822.3  | NP_001006181.1 |
| IPI00587779.3  | TOP2A_CHICK    |
| BRAF1_CHICK    | TOP2B_CHICK    |
| AB1IP_CHICK    | NP_001026129.1 |
| IPI00578929.3  | CI006_CHICK    |
| IPI00576555.1  | IPI00588243.2  |
| IPI00592402.3  | IPI00599886.3  |
| IPI00580030.3  | Q90716_CHICK   |
| NP_001029041.1 | Q9DEC9_CHICK   |
| IPI00598371.3  | IPI00582433.3  |
| NP_990072.1    | LOC419482      |
| NP_989587.1    | IPI00603402.4  |
| IPI00820606.1  | IPI00584919.4  |
| IPI00584425.3  | IPI00582510.3  |

O42347\_CHICK  
IPI00823282.1

Q9YGQ9\_CHICK  
IPI00571078.3

**Supplementary table 2. Differentially methylated genes between chicken breeds.**

| <b>Pairwise Comparison</b> | <b>Transcript ID</b>                                                                                                                                                                                                                                                                                                                                                                                                                                                                                                                                                                                                                                       |
|----------------------------|------------------------------------------------------------------------------------------------------------------------------------------------------------------------------------------------------------------------------------------------------------------------------------------------------------------------------------------------------------------------------------------------------------------------------------------------------------------------------------------------------------------------------------------------------------------------------------------------------------------------------------------------------------|
| RJF vs CH                  | No                                                                                                                                                                                                                                                                                                                                                                                                                                                                                                                                                                                                                                                         |
| RJF vs AA                  | ENSGALT00000028623<br>ENSGALT00000014058<br>ENSGALT00000016875<br>ENSGALT00000035558                                                                                                                                                                                                                                                                                                                                                                                                                                                                                                                                                                       |
| RJF vs WL                  | ENSGALT00000036045                                                                                                                                                                                                                                                                                                                                                                                                                                                                                                                                                                                                                                         |
| CH vs AA                   | No                                                                                                                                                                                                                                                                                                                                                                                                                                                                                                                                                                                                                                                         |
| CH vs WL                   | No                                                                                                                                                                                                                                                                                                                                                                                                                                                                                                                                                                                                                                                         |
| AA vs WL                   | ENSGALT00000030604<br>ENSGALT00000021191<br>ENSGALT00000028031<br>ENSGALT00000040394<br>ENSGALT00000040845<br>ENSGALT00000010200<br>ENSGALT00000005397<br>ENSGALT00000038997<br>ENSGALT00000038443<br>ENSGALT00000031378<br>ENSGALT00000039071<br>ENSGALT00000037637<br>ENSGALT00000037636<br>ENSGALT00000035375<br>ENSGALT00000036610<br>ENSGALT00000036593<br>ENSGALT00000040769<br>ENSGALT00000000424<br>ENSGALT00000031934<br>ENSGALT00000026577<br>ENSGALT00000018724<br>ENSGALT00000008285<br>ENSGALT00000006744<br>ENSGALT00000014058<br>ENSGALT00000032637<br>ENSGALT00000037801<br>ENSGALT00000029498<br>ENSGALT00000016875<br>ENSGALT00000020492 |

---

ENSGALT00000023582  
 ENSGALT00000036126  
 ENSGALT00000035645  
 ENSGALT00000035558  
 ENSGALT0000002697

---

**Supplementary table 3. DEGs between different chicken breeds.**

| <b>DEGs between RJF and CH</b> |                    | <b>DEGs between RJF and AA</b> |                    |
|--------------------------------|--------------------|--------------------------------|--------------------|
| <b>Ensembl Transcript ID</b>   | <b>HGNC symbol</b> | <b>Ensembl Transcript ID</b>   | <b>HGNC symbol</b> |
| ENSGALT0000000023              |                    | ENSGALT0000000026              | AAK1               |
| ENSGALT0000000026              | AAK1               | ENSGALT0000000084              |                    |
| ENSGALT0000000084              |                    | ENSGALT0000000104              | NRBP2              |
| ENSGALT0000000104              | NRBP2              | ENSGALT0000000128              | INTS4              |
| ENSGALT0000000216              | ZNF638             | ENSGALT0000000136              | ANTXR1             |
| ENSGALT0000000221              | CDS2               | ENSGALT0000000162              | ZMAT3              |
| ENSGALT0000000238              |                    | ENSGALT0000000216              | ZNF638             |
| ENSGALT0000000243              | MTCH1              | ENSGALT0000000221              | CDS2               |
| ENSGALT0000000312              | SP2                | ENSGALT0000000227              |                    |
| ENSGALT0000000385              | ARID4B             | ENSGALT0000000237              |                    |
| ENSGALT0000000407              |                    | ENSGALT0000000238              |                    |
| ENSGALT0000000417              | SIK2               | ENSGALT0000000296              |                    |
| ENSGALT0000000422              |                    | ENSGALT0000000312              | SP2                |
| ENSGALT0000000548              | LOXL2              | ENSGALT0000000353              | C2CD2L             |
| ENSGALT0000000627              | MRC2               | ENSGALT0000000385              | ARID4B             |
| ENSGALT0000000700              | KCTD20             | ENSGALT0000000407              |                    |
| ENSGALT0000000716              |                    | ENSGALT0000000417              | SIK2               |
| ENSGALT0000000721              | STK38              | ENSGALT0000000518              | SLC25A37           |
| ENSGALT0000000739              | ERRFI1             | ENSGALT0000000548              | LOXL2              |
| ENSGALT0000000779              | PI16               | ENSGALT0000000627              | MRC2               |
| ENSGALT0000000797              | PER3               | ENSGALT0000000716              |                    |
| ENSGALT0000000806              | RANBP3             | ENSGALT0000000721              | STK38              |
| ENSGALT0000000842              | KANSL1             | ENSGALT0000000739              | ERRFI1             |
| ENSGALT0000000878              |                    | ENSGALT0000000779              | PI16               |
| ENSGALT0000000950              | TMCC2              | ENSGALT0000000797              | PER3               |
| ENSGALT0000000994              | ELK4               | ENSGALT0000000806              | RANBP3             |
| ENSGALT0000001004              |                    | ENSGALT0000000864              | PPP1R15B           |
| ENSGALT0000001018              | SLC41A1            | ENSGALT0000000910              | CIRH1A             |
| ENSGALT0000001027              |                    | ENSGALT0000000950              | TMCC2              |
| ENSGALT0000001029              |                    | ENSGALT0000000994              | ELK4               |
| ENSGALT0000001098              | TBC1D22B           | ENSGALT0000001004              |                    |

|                    |          |                    |          |
|--------------------|----------|--------------------|----------|
| ENSGALT00000001106 |          | ENSGALT00000001018 | SLC41A1  |
| ENSGALT00000001189 | SRGAP2   | ENSGALT00000001027 |          |
| ENSGALT00000001203 | MAPK14   | ENSGALT00000001029 |          |
| ENSGALT00000001233 | KDM1A    | ENSGALT00000001093 | CAPN5    |
| ENSGALT00000001297 | MAPKAPK2 | ENSGALT00000001106 |          |
| ENSGALT00000001392 | WDTC1    | ENSGALT00000001149 |          |
| ENSGALT00000001407 | TEAD3    | ENSGALT00000001193 |          |
| ENSGALT00000001409 | TMEM222  | ENSGALT00000001199 |          |
| ENSGALT00000001481 |          | ENSGALT00000001203 | MAPK14   |
| ENSGALT00000001489 | MMP15    | ENSGALT00000001233 | KDM1A    |
| ENSGALT00000001507 |          | ENSGALT00000001289 | PHLPP2   |
| ENSGALT00000001527 | SCAMP4   | ENSGALT00000001297 | MAPKAPK2 |
| ENSGALT00000001535 | SCAI     | ENSGALT00000001398 |          |
| ENSGALT00000001662 | MIER2    | ENSGALT00000001401 |          |
| ENSGALT00000001752 |          | ENSGALT00000001409 | TMEM222  |
| ENSGALT00000001766 |          | ENSGALT00000001481 |          |
| ENSGALT00000001774 | SEMA6B   | ENSGALT00000001514 | GOLGA1   |
| ENSGALT00000001776 |          | ENSGALT00000001527 | SCAMP4   |
| ENSGALT00000001786 | CD34     | ENSGALT00000001603 | ELN      |
| ENSGALT00000001814 |          | ENSGALT00000001666 |          |
| ENSGALT00000001841 | MSL2     | ENSGALT00000001706 | WBSCR17  |
| ENSGALT00000001850 | PIGU     | ENSGALT00000001720 | ZNF346   |
| ENSGALT00000001925 | GTF2I    | ENSGALT00000001776 |          |
| ENSGALT00000001983 |          | ENSGALT00000001786 | CD34     |
| ENSGALT00000001988 |          | ENSGALT00000001790 | KCNJ5    |
| ENSGALT00000002003 | UBE2Z    | ENSGALT00000001801 | DHX8     |
| ENSGALT00000002011 | CAMK1G   | ENSGALT00000001841 | MSL2     |
| ENSGALT00000002047 | ZBTB44   | ENSGALT00000001850 | PIGU     |
| ENSGALT00000002082 |          | ENSGALT00000001852 | HERPUD1  |
| ENSGALT00000002090 | ADAMTS8  | ENSGALT00000001897 |          |
| ENSGALT00000002140 | ADAMTS15 | ENSGALT00000001916 | CLIC4    |
| ENSGALT00000002157 | ADRA1B   | ENSGALT00000001925 | GTF2I    |
| ENSGALT00000002165 |          | ENSGALT00000001947 | HOXB9    |
| ENSGALT00000002191 | RANBP10  | ENSGALT00000001984 |          |
| ENSGALT00000002223 | ANKFY1   | ENSGALT00000001988 |          |
| ENSGALT00000002306 | FHL3     | ENSGALT00000002047 | ZBTB44   |
| ENSGALT00000002314 | PHF20    | ENSGALT00000002068 | MORN5    |
| ENSGALT00000002321 | VWA1     | ENSGALT00000002090 | ADAMTS8  |
| ENSGALT00000002335 |          | ENSGALT00000002121 |          |
| ENSGALT00000002495 | DUSP26   | ENSGALT00000002140 | ADAMTS15 |
| ENSGALT00000002498 | EDC4     | ENSGALT00000002165 |          |
| ENSGALT00000002567 |          | ENSGALT00000002191 | RANBP10  |

|                    |                |                    |          |
|--------------------|----------------|--------------------|----------|
| ENSGALT00000002623 | MED1           | ENSGALT00000002218 | PDIK1L   |
| ENSGALT00000002654 | DGKD           | ENSGALT00000002223 | ANKFY1   |
| ENSGALT00000002657 | CDK12          | ENSGALT00000002230 | JAM3     |
| ENSGALT00000002661 | LRIG2          | ENSGALT00000002268 | PPM1F    |
| ENSGALT00000002706 |                | ENSGALT00000002291 |          |
| ENSGALT00000002733 | MFSD11         | ENSGALT00000002299 | CNTRL    |
| ENSGALT00000002757 | ADPGK          | ENSGALT00000002314 | PHF20    |
| ENSGALT00000002971 | DNAJB5         | ENSGALT00000002321 | VWA1     |
| ENSGALT00000003000 | SLC25A24       | ENSGALT00000002333 | STAB1    |
| ENSGALT00000003002 | HIPK1          | ENSGALT00000002335 |          |
| ENSGALT00000003005 | SPDL1          | ENSGALT00000002409 |          |
| ENSGALT00000003045 | INPP5E         | ENSGALT00000002416 |          |
| ENSGALT00000003064 | PRPF38B        | ENSGALT00000002422 | MLLT1    |
| ENSGALT00000003093 |                | ENSGALT00000002469 | OGFOD3   |
| ENSGALT00000003103 | LIMS2          | ENSGALT00000002498 | EDC4     |
| ENSGALT00000003133 | MMRN2          | ENSGALT00000002508 |          |
| ENSGALT00000003142 | CAPN15         | ENSGALT00000002514 |          |
| ENSGALT00000003148 | COMT           | ENSGALT00000002516 |          |
| ENSGALT00000003180 |                | ENSGALT00000002609 |          |
| ENSGALT00000003276 | PFKFB4         | ENSGALT00000002623 | MED1     |
| ENSGALT00000003315 | PLEKHN1        | ENSGALT00000002654 | DGKD     |
| ENSGALT00000003339 | PGAM5          | ENSGALT00000002657 | CDK12    |
| ENSGALT00000003495 | RERE           | ENSGALT00000002661 | LRIG2    |
| ENSGALT00000003506 | C3orf18        | ENSGALT00000002706 |          |
| ENSGALT00000003543 |                | ENSGALT00000002716 | ACAP3    |
| ENSGALT00000003559 | DCUN1D3        | ENSGALT00000002729 | CEP250   |
| ENSGALT00000003570 |                | ENSGALT00000002733 | MFSD11   |
| ENSGALT00000003571 | UNK            | ENSGALT00000002757 | ADPGK    |
| ENSGALT00000003716 | CMTR2          | ENSGALT00000002758 | HECTD2   |
| ENSGALT00000003726 | SEC16A         | ENSGALT00000002781 | IFT74    |
| ENSGALT00000003737 |                | ENSGALT00000002784 |          |
| ENSGALT00000003784 | ULK1           | ENSGALT00000002785 | IWS1     |
| ENSGALT00000003831 |                | ENSGALT00000003000 | SLC25A24 |
| ENSGALT00000003844 | FAM69B         | ENSGALT00000003002 | HIPK1    |
| ENSGALT00000003846 | BDP1           | ENSGALT00000003005 | SPDL1    |
| ENSGALT00000003980 | TMEM201        | ENSGALT00000003038 |          |
| ENSGALT00000003987 |                | ENSGALT00000003045 | INPP5E   |
| ENSGALT00000004014 | CSGALNAC<br>T2 | ENSGALT00000003064 | PRPF38B  |
| ENSGALT00000004041 | GPR133         | ENSGALT00000003067 | GNL2     |
| ENSGALT00000004086 | MSS51          | ENSGALT00000003093 |          |
| ENSGALT00000004111 |                | ENSGALT00000003103 | LIMS2    |



|                    |          |                    |          |
|--------------------|----------|--------------------|----------|
| ENSGALT00000004115 |          | ENSGALT00000003133 | MMRN2    |
| ENSGALT00000004144 | TMEM248  | ENSGALT00000003142 | CAPN15   |
| ENSGALT00000004204 |          | ENSGALT00000003145 | ZC3H12A  |
| ENSGALT00000004213 | GRPEL2   | ENSGALT00000003148 | COMT     |
| ENSGALT00000004255 |          | ENSGALT00000003157 | AHCY     |
| ENSGALT00000004258 | ATP8B2   | ENSGALT00000003180 |          |
| ENSGALT00000004357 |          | ENSGALT00000003192 |          |
| ENSGALT00000004394 | PITPNA   | ENSGALT00000003246 | MMP19    |
| ENSGALT00000004469 | SH3PXD2B | ENSGALT00000003296 | TSTD2    |
| ENSGALT00000004481 | GRM4     | ENSGALT00000003315 | PLEKHN1  |
| ENSGALT00000004554 | CASZ1    | ENSGALT00000003339 | PGAM5    |
| ENSGALT00000004596 |          | ENSGALT00000003364 | CAMSAP2  |
| ENSGALT00000004598 |          | ENSGALT00000003449 |          |
| ENSGALT00000004650 | PRPF8    | ENSGALT00000003506 | C3orf18  |
| ENSGALT00000004669 |          | ENSGALT00000003529 | AGO1     |
| ENSGALT00000004844 | EZH1     | ENSGALT00000003543 |          |
| ENSGALT00000004906 | AMFR     | ENSGALT00000003570 |          |
| ENSGALT00000004933 | NCOR2    | ENSGALT00000003612 | TMEM132E |
| ENSGALT00000005129 | RAD54L2  | ENSGALT00000003644 | SORD     |
| ENSGALT00000005131 | LSM1     | ENSGALT00000003716 | CMTR2    |
| ENSGALT00000005219 | ADAMTS12 | ENSGALT00000003726 | SEC16A   |
| ENSGALT00000005236 | CRTC1    | ENSGALT00000003831 |          |
| ENSGALT00000005327 | KAT2A    | ENSGALT00000003844 | FAM69B   |
| ENSGALT00000005338 |          | ENSGALT00000003846 | BDP1     |
| ENSGALT00000005386 |          | ENSGALT00000003906 | B3GALT2  |
| ENSGALT00000005407 | ZBTB8A   | ENSGALT00000003918 | SFSWAP   |
| ENSGALT00000005424 |          | ENSGALT00000003944 |          |
| ENSGALT00000005581 | ARRDC2   | ENSGALT00000003954 | COL5A2   |
| ENSGALT00000005592 | KLHL11   | ENSGALT00000003980 | TMEM201  |
| ENSGALT00000005608 |          | ENSGALT00000003987 |          |
| ENSGALT00000005617 | PRELP    | ENSGALT00000004032 |          |
| ENSGALT00000005643 |          | ENSGALT00000004041 | GPR133   |
| ENSGALT00000005655 |          | ENSGALT00000004086 | MSS51    |
| ENSGALT00000005662 | RNF19B   | ENSGALT00000004113 | U2SURP   |
| ENSGALT00000005664 |          | ENSGALT00000004144 | TMEM248  |
| ENSGALT00000005721 | DARS2    | ENSGALT00000004183 |          |
| ENSGALT00000005731 |          | ENSGALT00000004187 |          |
| ENSGALT00000005844 | PAPSS2   | ENSGALT00000004201 | OLFML2B  |
| ENSGALT00000005921 | UCK1     | ENSGALT00000004204 |          |
| ENSGALT00000005938 | CPAMD8   | ENSGALT00000004213 | GRPEL2   |
| ENSGALT00000005939 | VPS37B   | ENSGALT00000004246 | FAM149B1 |
| ENSGALT00000005982 | SIN3B    | ENSGALT00000004255 |          |

|                    |          |                    |          |
|--------------------|----------|--------------------|----------|
| ENSGALT00000005992 | PRRC2B   | ENSGALT00000004258 | ATP8B2   |
| ENSGALT00000006018 | SLC35E1  | ENSGALT00000004357 |          |
| ENSGALT00000006028 | PABPC4   | ENSGALT00000004469 | SH3PXD2B |
| ENSGALT00000006051 | NT5C1A   | ENSGALT00000004489 | NEURL1B  |
| ENSGALT00000006133 |          | ENSGALT00000004494 |          |
| ENSGALT00000006155 |          | ENSGALT00000004499 | SARDH    |
| ENSGALT00000006164 |          | ENSGALT00000004517 | ERGIC1   |
| ENSGALT00000006179 | MTMR10   | ENSGALT00000004533 | ZBTB38   |
| ENSGALT00000006182 | SGCD     | ENSGALT00000004538 |          |
| ENSGALT00000006265 |          | ENSGALT00000004555 |          |
| ENSGALT00000006362 |          | ENSGALT00000004573 | ALPK2    |
| ENSGALT00000006375 |          | ENSGALT00000004598 |          |
| ENSGALT00000006417 | PHF12    | ENSGALT00000004728 | SERPINF2 |
| ENSGALT00000006422 | GALNT10  | ENSGALT00000004808 | SRM      |
| ENSGALT00000006478 | TET1     | ENSGALT00000004815 |          |
| ENSGALT00000006504 | FNBP1    | ENSGALT00000004844 | EZH1     |
| ENSGALT00000006533 | CCAR1    | ENSGALT00000004876 |          |
| ENSGALT00000006584 |          | ENSGALT00000005064 | TRADD    |
| ENSGALT00000006652 | NSRP1    | ENSGALT00000005088 | TSPO2    |
| ENSGALT00000006657 |          | ENSGALT00000005135 |          |
| ENSGALT00000006663 | SLTM     | ENSGALT00000005192 | COMP     |
| ENSGALT00000006691 |          | ENSGALT00000005219 | ADAMTS12 |
| ENSGALT00000006699 | ABL2     | ENSGALT00000005224 |          |
| ENSGALT00000006741 | TRAF3IP1 | ENSGALT00000005236 | CRTC1    |
| ENSGALT00000006768 | SNX8     | ENSGALT00000005261 | TBC1D2B  |
| ENSGALT00000006838 | CPD      | ENSGALT00000005262 | OSGIN1   |
| ENSGALT00000006896 |          | ENSGALT00000005305 | RAI14    |
| ENSGALT00000006907 | ABCA5    | ENSGALT00000005327 | KAT2A    |
| ENSGALT00000006909 |          | ENSGALT00000005338 |          |
| ENSGALT00000006945 | CCDC69   | ENSGALT00000005348 | LSM4     |
| ENSGALT00000006957 | MCM3AP   | ENSGALT00000005353 | DNAJC21  |
| ENSGALT00000006970 |          | ENSGALT00000005373 |          |
| ENSGALT00000007036 | ASCC1    | ENSGALT00000005381 | ZNF385C  |
| ENSGALT00000007195 | TRPV2    | ENSGALT00000005391 | SOGA1    |
| ENSGALT00000007219 | DCTN4    | ENSGALT00000005397 | RALGDS   |
| ENSGALT00000007279 | LRRC8A   | ENSGALT00000005424 |          |
| ENSGALT00000007292 | NPLOC4   | ENSGALT00000005561 | AGPAT6   |
| ENSGALT00000007303 | CLCN6    | ENSGALT00000005592 | KLHL11   |
| ENSGALT00000007311 |          | ENSGALT00000005608 |          |
| ENSGALT00000007316 | ZBTB37   | ENSGALT00000005617 | PRELP    |
| ENSGALT00000007398 |          | ENSGALT00000005643 |          |
| ENSGALT00000007437 | SMG7     | ENSGALT00000005664 |          |

|                    |          |                    |           |
|--------------------|----------|--------------------|-----------|
| ENSGALT00000007475 | NLE1     | ENSGALT00000005683 |           |
| ENSGALT00000007675 | EDEM3    | ENSGALT00000005708 |           |
| ENSGALT00000007728 | APLNR    | ENSGALT00000005731 |           |
| ENSGALT00000007743 | ZMIZ1    | ENSGALT00000005824 | PRKAR1B   |
| ENSGALT00000007760 | FICD     | ENSGALT00000005832 |           |
| ENSGALT00000007838 |          | ENSGALT00000005902 | CHD9      |
| ENSGALT00000007851 |          | ENSGALT00000005921 | UCK1      |
| ENSGALT00000007950 |          | ENSGALT00000005924 |           |
| ENSGALT00000008038 |          | ENSGALT00000005938 | CPAMD8    |
| ENSGALT00000008172 | SLC25A25 | ENSGALT00000005939 | VPS37B    |
| ENSGALT00000008174 | B9D1     | ENSGALT00000005940 |           |
| ENSGALT00000008181 | GDPD1    | ENSGALT00000005967 |           |
| ENSGALT00000008222 | FBLN2    | ENSGALT00000005982 | SIN3B     |
| ENSGALT00000008232 | LSM14B   | ENSGALT00000005992 | PRRC2B    |
| ENSGALT00000008249 | KCTD10   | ENSGALT00000006018 | SLC35E1   |
| ENSGALT00000008264 | PDP2     | ENSGALT00000006033 | DAB2      |
| ENSGALT00000008397 | MYOZ1    | ENSGALT00000006051 | NT5C1A    |
| ENSGALT00000008452 |          | ENSGALT00000006070 | NUP214    |
| ENSGALT00000008454 | SEC22C   | ENSGALT00000006125 | PAPD5     |
| ENSGALT00000008481 | TRMT13   | ENSGALT00000006133 |           |
| ENSGALT00000008492 | BCAS3    | ENSGALT00000006164 |           |
| ENSGALT00000008503 |          | ENSGALT00000006179 | MTMR10    |
| ENSGALT00000008587 | ZBTB5    | ENSGALT00000006182 | SGCD      |
| ENSGALT00000008746 | CCDC66   | ENSGALT00000006206 | MPHOSPH10 |
| ENSGALT00000008792 |          | ENSGALT00000006228 | CAP1      |
| ENSGALT00000008794 |          | ENSGALT00000006230 | EPS15L1   |
| ENSGALT00000008940 | NOLC1    | ENSGALT00000006250 |           |
| ENSGALT00000009006 |          | ENSGALT00000006252 | MYPN      |
| ENSGALT00000009044 | GBF1     | ENSGALT00000006317 |           |
| ENSGALT00000009068 |          | ENSGALT00000006358 | RUFY2     |
| ENSGALT00000009079 | FOXO4    | ENSGALT00000006362 |           |
| ENSGALT00000009084 |          | ENSGALT00000006374 | LARP1     |
| ENSGALT00000009103 | TTC28    | ENSGALT00000006422 | GALNT10   |
| ENSGALT00000009141 | HIF1AN   | ENSGALT00000006424 |           |
| ENSGALT00000009190 | CSF1R    | ENSGALT00000006478 | TET1      |
| ENSGALT00000009240 |          | ENSGALT00000006533 | CCAR1     |
| ENSGALT00000009267 | HMGXB3   | ENSGALT00000006540 |           |
| ENSGALT00000009269 |          | ENSGALT00000006583 | SH3BP4    |
| ENSGALT00000009283 |          | ENSGALT00000006584 |           |
| ENSGALT00000009328 | SEPT2    | ENSGALT00000006652 | NSRP1     |
| ENSGALT00000009350 | FAM219A  | ENSGALT00000006663 | SLTM      |
| ENSGALT00000009355 |          | ENSGALT00000006691 |           |

|                   |         |                   |           |
|-------------------|---------|-------------------|-----------|
| ENSGALT0000009408 |         | ENSGALT0000006699 | ABL2      |
| ENSGALT0000009410 | TBC1D9B | ENSGALT0000006741 | TRAF3IP1  |
| ENSGALT0000009416 | ALOX5   | ENSGALT0000006768 | SNX8      |
| ENSGALT0000009484 | USP8    | ENSGALT0000006793 | ASB1      |
| ENSGALT0000009494 | PCMTD2  | ENSGALT0000006838 | CPD       |
| ENSGALT0000009591 | SEC61A1 | ENSGALT0000006867 | AGGF1     |
| ENSGALT0000009600 | RIC3    | ENSGALT0000006945 | CCDC69    |
| ENSGALT0000009602 | KBTBD12 | ENSGALT0000006957 | MCM3AP    |
| ENSGALT0000009653 | ADAMTS2 | ENSGALT0000006978 |           |
| ENSGALT0000009656 | PRPF6   | ENSGALT0000007014 |           |
| ENSGALT0000009741 | FAM64A  | ENSGALT0000007036 | ASCC1     |
| ENSGALT0000009806 |         | ENSGALT0000007061 | LHFPL2    |
| ENSGALT0000009845 | ZNF644  | ENSGALT0000007150 | FAM73B    |
| ENSGALT0000009867 |         | ENSGALT0000007193 | PARP3     |
| ENSGALT0000009889 |         | ENSGALT0000007219 | DCTN4     |
| ENSGALT0000009913 | GGA2    | ENSGALT0000007279 | LRRC8A    |
| ENSGALT0000009976 | SLC9A6  | ENSGALT0000007290 | NDST1     |
| ENSGALT0000009988 | FHL1    | ENSGALT0000007292 | NPLOC4    |
| ENSGALT0000010006 | TBC1D20 | ENSGALT0000007303 | CLCN6     |
| ENSGALT0000010117 | KIRREL  | ENSGALT0000007316 | ZBTB37    |
| ENSGALT0000010138 |         | ENSGALT0000007345 |           |
| ENSGALT0000010215 |         | ENSGALT0000007398 |           |
| ENSGALT0000010255 |         | ENSGALT0000007431 | ZDHHC12   |
| ENSGALT0000010304 | LIPA    | ENSGALT0000007437 | SMG7      |
| ENSGALT0000010311 |         | ENSGALT0000007475 | NLE1      |
| ENSGALT0000010312 | UBXN7   | ENSGALT0000007484 | PDAP1     |
| ENSGALT0000010319 | CRKL    | ENSGALT0000007499 | CSEIL     |
| ENSGALT0000010339 | DDX46   | ENSGALT0000007566 |           |
| ENSGALT0000010372 | PAK2    | ENSGALT0000007571 | NOL8      |
| ENSGALT0000010426 |         | ENSGALT0000007588 | CEP89     |
| ENSGALT0000010518 | CLMP    | ENSGALT0000007592 | DHRS7B    |
| ENSGALT0000010594 | MCF2    | ENSGALT0000007608 | C1QA      |
| ENSGALT0000010602 | UBASH3B | ENSGALT0000007637 |           |
| ENSGALT0000010619 |         | ENSGALT0000007643 | TNFAIP8L3 |
| ENSGALT0000010635 | PLAGL2  | ENSGALT0000007656 | MPRIIP    |
| ENSGALT0000010676 |         | ENSGALT0000007669 | EPB42     |
| ENSGALT0000010751 | DUSP8   | ENSGALT0000007675 | EDEM3     |
| ENSGALT0000010812 | ABHD2   | ENSGALT0000007729 | NT5M      |
| ENSGALT0000010834 |         | ENSGALT0000007734 | SEMA6D    |
| ENSGALT0000010909 | DET1    | ENSGALT0000007743 | ZMIZ1     |
| ENSGALT0000010917 |         | ENSGALT0000007760 | FICD      |
| ENSGALT0000010935 |         | ENSGALT0000007838 |           |

|                    |          |                    |          |
|--------------------|----------|--------------------|----------|
| ENSGALT00000010949 |          | ENSGALT00000007851 |          |
| ENSGALT00000010963 | KLHDC8B  | ENSGALT00000007937 | GLA      |
| ENSGALT00000010978 | CCDC71   | ENSGALT00000007950 |          |
| ENSGALT00000011032 | USP19    | ENSGALT00000007962 | SLC27A4  |
| ENSGALT00000011062 | TSPAN4   | ENSGALT00000007980 | ALKBH5   |
| ENSGALT00000011145 | SLC38A10 | ENSGALT00000007982 |          |
| ENSGALT00000011206 | BAIAP2   | ENSGALT00000007990 | CERCAM   |
| ENSGALT00000011255 |          | ENSGALT00000008018 |          |
| ENSGALT00000011260 | CHD2     | ENSGALT00000008038 |          |
| ENSGALT00000011440 |          | ENSGALT00000008115 | PPM1E    |
| ENSGALT00000011465 | CCNY     | ENSGALT00000008172 | SLC25A25 |
| ENSGALT00000011484 | LYSMD4   | ENSGALT00000008174 | B9D1     |
| ENSGALT00000011502 | MLEC     | ENSGALT00000008185 | TPR      |
| ENSGALT00000011547 |          | ENSGALT00000008219 | SWT1     |
| ENSGALT00000011568 | RNF10    | ENSGALT00000008222 | FBLN2    |
| ENSGALT00000011657 |          | ENSGALT00000008243 |          |
| ENSGALT00000011691 | HGS      | ENSGALT00000008249 | KCTD10   |
| ENSGALT00000011727 |          | ENSGALT00000008264 | PDP2     |
| ENSGALT00000011730 |          | ENSGALT00000008293 |          |
| ENSGALT00000011799 |          | ENSGALT00000008325 | SEC24C   |
| ENSGALT00000011867 | ABAT     | ENSGALT00000008407 | USP54    |
| ENSGALT00000011871 |          | ENSGALT00000008474 | LRRC39   |
| ENSGALT00000011897 | MAP3K8   | ENSGALT00000008481 | TRMT13   |
| ENSGALT00000011900 | CILP     | ENSGALT00000008490 | PPFIBP2  |
| ENSGALT00000011962 |          | ENSGALT00000008492 | BCAS3    |
| ENSGALT00000011996 |          | ENSGALT00000008503 |          |
| ENSGALT00000012011 | PPRC1    | ENSGALT00000008519 | SRFBP1   |
| ENSGALT00000012079 |          | ENSGALT00000008552 | SNCAIP   |
| ENSGALT00000012083 | PCYT1A   | ENSGALT00000008553 |          |
| ENSGALT00000012148 |          | ENSGALT00000008587 | ZBTB5    |
| ENSGALT00000012192 | ANKRD2   | ENSGALT00000008738 |          |
| ENSGALT00000012431 |          | ENSGALT00000008746 | CCDC66   |
| ENSGALT00000012457 | BCL9L    | ENSGALT00000008792 |          |
| ENSGALT00000012479 |          | ENSGALT00000008794 |          |
| ENSGALT00000012623 |          | ENSGALT00000008805 |          |
| ENSGALT00000012655 |          | ENSGALT00000008859 | DYNLL2   |
| ENSGALT00000012737 | ATRX     | ENSGALT00000008940 | NOLC1    |
| ENSGALT00000012797 |          | ENSGALT00000008944 | AKAP1    |
| ENSGALT00000012884 |          | ENSGALT00000009029 |          |
| ENSGALT00000012901 |          | ENSGALT00000009037 | MRVII    |
| ENSGALT00000012929 | AHCYL2   | ENSGALT00000009044 | GBF1     |
| ENSGALT00000012936 | ALG9     | ENSGALT00000009068 |          |

|                    |           |                    |          |
|--------------------|-----------|--------------------|----------|
| ENSGALT00000012996 | CAPN6     | ENSGALT00000009079 | FOXO4    |
| ENSGALT00000013006 |           | ENSGALT00000009090 |          |
| ENSGALT00000013018 | KIAA0195  | ENSGALT00000009103 | TTC28    |
| ENSGALT00000013063 | MTMR3     | ENSGALT00000009141 | HIF1AN   |
| ENSGALT00000013071 | B4GALT5   | ENSGALT00000009190 | CSF1R    |
| ENSGALT00000013077 | PAK3      | ENSGALT00000009192 | PDGFRB   |
| ENSGALT00000013128 |           | ENSGALT00000009240 |          |
| ENSGALT00000013157 | CCDC88A   | ENSGALT00000009266 |          |
| ENSGALT00000013221 | COL4A5    | ENSGALT00000009267 | HMGXB3   |
| ENSGALT00000013245 | SRPK2     | ENSGALT00000009269 |          |
| ENSGALT00000013265 |           | ENSGALT00000009283 |          |
| ENSGALT00000013322 |           | ENSGALT00000009327 | KREMEN1  |
| ENSGALT00000013428 |           | ENSGALT00000009328 | SEPT2    |
| ENSGALT00000013447 | COL4A6    | ENSGALT00000009335 |          |
| ENSGALT00000013512 |           | ENSGALT00000009337 | BCAR3    |
| ENSGALT00000013524 |           | ENSGALT00000009355 |          |
| ENSGALT00000013539 | SLK       | ENSGALT00000009407 | CLUH     |
| ENSGALT00000013587 | ATG13     | ENSGALT00000009408 |          |
| ENSGALT00000013683 | ANKRD12   | ENSGALT00000009410 | TBC1D9B  |
| ENSGALT00000013704 | DVL3      | ENSGALT00000009467 |          |
| ENSGALT00000013753 |           | ENSGALT00000009484 | USP8     |
| ENSGALT00000013794 | SLC35B4   | ENSGALT00000009494 | PCMTD2   |
| ENSGALT00000013841 |           | ENSGALT00000009591 | SEC61A1  |
| ENSGALT00000013858 | THOC2     | ENSGALT00000009602 | KBTBD12  |
| ENSGALT00000013962 |           | ENSGALT00000009612 | KIAA1107 |
| ENSGALT00000013983 | GPR1      | ENSGALT00000009653 | ADAMTS2  |
| ENSGALT00000014012 | TMEM255A  | ENSGALT00000009656 | PRPF6    |
| ENSGALT00000014023 |           | ENSGALT00000009723 |          |
| ENSGALT00000014035 |           | ENSGALT00000009734 |          |
| ENSGALT00000014106 |           | ENSGALT00000009741 | FAM64A   |
| ENSGALT00000014151 |           | ENSGALT00000009742 |          |
| ENSGALT00000014170 |           | ENSGALT00000009845 | ZNF644   |
| ENSGALT00000014182 | ABI2      | ENSGALT00000009846 | ZNF644   |
| ENSGALT00000014184 | FLRT3     | ENSGALT00000009861 | FAM122B  |
| ENSGALT00000014239 | DPH7      | ENSGALT00000009864 |          |
| ENSGALT00000014277 | CTBS      | ENSGALT00000009867 |          |
| ENSGALT00000014329 | LRRN4     | ENSGALT00000009909 | DIP2B    |
| ENSGALT00000014340 | IQUB      | ENSGALT00000009913 | GGA2     |
| ENSGALT00000014420 | PLCB1     | ENSGALT00000009976 | SLC9A6   |
| ENSGALT00000014545 | NEXN      | ENSGALT00000009993 |          |
| ENSGALT00000014566 | C10orf118 | ENSGALT00000010006 | TBC1D20  |
| ENSGALT00000014643 |           | ENSGALT00000010046 | ANKRD11  |

|                    |          |                    |          |
|--------------------|----------|--------------------|----------|
| ENSGALT00000014661 | SMG5     | ENSGALT00000010117 | KIRREL   |
| ENSGALT00000014665 | TRAF2    | ENSGALT00000010129 |          |
| ENSGALT00000014710 | CLDN12   | ENSGALT00000010215 |          |
| ENSGALT00000014731 |          | ENSGALT00000010255 |          |
| ENSGALT00000014752 |          | ENSGALT00000010272 |          |
| ENSGALT00000014767 | CD99L2   | ENSGALT00000010280 |          |
| ENSGALT00000014770 | GALNT14  | ENSGALT00000010304 | LIPA     |
| ENSGALT00000014774 | MAN1B1   | ENSGALT00000010311 |          |
| ENSGALT00000014779 | FAM160B1 | ENSGALT00000010312 | UBXN7    |
| ENSGALT00000014827 |          | ENSGALT00000010319 | CRKL     |
| ENSGALT00000014832 |          | ENSGALT00000010339 | DDX46    |
| ENSGALT00000015009 |          | ENSGALT00000010372 | PAK2     |
| ENSGALT00000015084 |          | ENSGALT00000010376 |          |
| ENSGALT00000015117 |          | ENSGALT00000010411 |          |
| ENSGALT00000015176 |          | ENSGALT00000010484 | RPP30    |
| ENSGALT00000015190 |          | ENSGALT00000010518 | CLMP     |
| ENSGALT00000015206 |          | ENSGALT00000010562 | TBC1D12  |
| ENSGALT00000015328 | MYNN     | ENSGALT00000010596 |          |
| ENSGALT00000015350 | KIAA0247 | ENSGALT00000010602 | UBASH3B  |
| ENSGALT00000015385 |          | ENSGALT00000010607 | TM9SF4   |
| ENSGALT00000015414 |          | ENSGALT00000010635 | PLAGL2   |
| ENSGALT00000015427 |          | ENSGALT00000010641 |          |
| ENSGALT00000015464 | TMA16    | ENSGALT00000010650 | ZMYND11  |
| ENSGALT00000015642 |          | ENSGALT00000010676 |          |
| ENSGALT00000015678 |          | ENSGALT00000010684 | FBXO3    |
| ENSGALT00000015681 | KCTD12   | ENSGALT00000010687 | FRA10AC1 |
| ENSGALT00000015751 |          | ENSGALT00000010760 | DIP2C    |
| ENSGALT00000015787 |          | ENSGALT00000010812 | ABHD2    |
| ENSGALT00000015887 |          | ENSGALT00000010817 | UPF2     |
| ENSGALT00000015940 |          | ENSGALT00000010834 |          |
| ENSGALT00000015941 | SETD7    | ENSGALT00000010845 |          |
| ENSGALT00000015973 | CCDC173  | ENSGALT00000010875 |          |
| ENSGALT00000015996 | PPIG     | ENSGALT00000010889 |          |
| ENSGALT00000015998 | NKTR     | ENSGALT00000010901 | PVRL1    |
| ENSGALT00000016025 |          | ENSGALT00000010909 | DET1     |
| ENSGALT00000016037 |          | ENSGALT00000010917 |          |
| ENSGALT00000016039 | RNF150   | ENSGALT00000010935 |          |
| ENSGALT00000016236 | ARHGAP5  | ENSGALT00000010949 |          |
| ENSGALT00000016289 | BAZ1A    | ENSGALT00000010978 | CCDC71   |
| ENSGALT00000016303 |          | ENSGALT00000011032 | USP19    |
| ENSGALT00000016376 | KDM4A    | ENSGALT00000011059 |          |
| ENSGALT00000016432 | DMAP1    | ENSGALT00000011145 | SLC38A10 |

|                    |         |                    |          |
|--------------------|---------|--------------------|----------|
| ENSGALT00000016441 |         | ENSGALT00000011162 | ITIH5    |
| ENSGALT00000016446 | SCLT1   | ENSGALT00000011184 |          |
| ENSGALT00000016472 | PLK3    | ENSGALT00000011226 |          |
| ENSGALT00000016480 | ZFAND3  | ENSGALT00000011260 | CHD2     |
| ENSGALT00000016488 |         | ENSGALT00000011292 | CDK5RAP2 |
| ENSGALT00000016531 |         | ENSGALT00000011460 | ATP13A3  |
| ENSGALT00000016540 | SLC35B2 | ENSGALT00000011465 | CCNY     |
| ENSGALT00000016569 | FBXO33  | ENSGALT00000011502 | MLEC     |
| ENSGALT00000016584 |         | ENSGALT00000011547 |          |
| ENSGALT00000016627 | TOE1    | ENSGALT00000011621 |          |
| ENSGALT00000016690 | LTBP2   | ENSGALT00000011657 |          |
| ENSGALT00000016725 | TMEM63B | ENSGALT00000011691 | HGS      |
| ENSGALT00000016788 | MAST2   | ENSGALT00000011713 |          |
| ENSGALT00000016792 | NEK9    | ENSGALT00000011730 |          |
| ENSGALT00000016835 |         | ENSGALT00000011752 |          |
| ENSGALT00000016854 | POMGNT1 | ENSGALT00000011799 |          |
| ENSGALT00000016864 |         | ENSGALT00000011867 | ABAT     |
| ENSGALT00000016897 | FAM13A  | ENSGALT00000011871 |          |
| ENSGALT00000016916 | TJAP1   | ENSGALT00000011900 | CILP     |
| ENSGALT00000016934 |         | ENSGALT00000011913 | RBFOX1   |
| ENSGALT00000016991 | CP      | ENSGALT00000011962 |          |
| ENSGALT00000017142 |         | ENSGALT00000012038 | IFT46    |
| ENSGALT00000017215 | STON2   | ENSGALT00000012079 |          |
| ENSGALT00000017430 | SDCCAG8 | ENSGALT00000012083 | PCYT1A   |
| ENSGALT00000017485 |         | ENSGALT00000012140 |          |
| ENSGALT00000017502 | TRIP11  | ENSGALT00000012148 |          |
| ENSGALT00000017560 |         | ENSGALT00000012192 | ANKRD2   |
| ENSGALT00000017630 | BTBD7   | ENSGALT00000012207 |          |
| ENSGALT00000017703 | ANTXR2  | ENSGALT00000012208 | TPCN2    |
| ENSGALT00000017844 |         | ENSGALT00000012273 | C7orf26  |
| ENSGALT00000017890 | NID1    | ENSGALT00000012281 | LRCH3    |
| ENSGALT00000017959 | CACHD1  | ENSGALT00000012479 |          |
| ENSGALT00000017964 | RAVER2  | ENSGALT00000012554 | CASS4    |
| ENSGALT00000017973 | AK4     | ENSGALT00000012618 |          |
| ENSGALT00000017992 | AFF1    | ENSGALT00000012623 |          |
| ENSGALT00000018051 |         | ENSGALT00000012655 |          |
| ENSGALT00000018061 | CCSAP   | ENSGALT00000012660 | GXYLT2   |
| ENSGALT00000018137 |         | ENSGALT00000012664 | VASN     |
| ENSGALT00000018147 | LIN54   | ENSGALT00000012737 | ATRX     |
| ENSGALT00000018212 | WIPF3   | ENSGALT00000012759 |          |
| ENSGALT00000018221 | CEP290  | ENSGALT00000012805 | PAMR1    |
| ENSGALT00000018228 | FAM120B | ENSGALT00000012808 |          |



|                    |          |                    |          |
|--------------------|----------|--------------------|----------|
| ENSGALT00000018324 | GALNT15  | ENSGALT00000012856 | C15orf61 |
| ENSGALT00000018386 |          | ENSGALT00000012861 | PRR5L    |
| ENSGALT00000018392 |          | ENSGALT00000012901 |          |
| ENSGALT00000018413 |          | ENSGALT00000012936 | ALG9     |
| ENSGALT00000018542 | TTLL4    | ENSGALT00000012996 | CAPN6    |
| ENSGALT00000018652 |          | ENSGALT00000013011 | EXT2     |
| ENSGALT00000018657 |          | ENSGALT00000013018 | KIAA0195 |
| ENSGALT00000018669 |          | ENSGALT00000013037 | TMEM209  |
| ENSGALT00000018681 | CCNI     | ENSGALT00000013051 | CORO2B   |
| ENSGALT00000018727 | CMTM6    | ENSGALT00000013071 | B4GALT5  |
| ENSGALT00000018770 | ANO10    | ENSGALT00000013107 | AMMECR1  |
| ENSGALT00000018812 | EAF1     | ENSGALT00000013128 |          |
| ENSGALT00000019023 | ANKRD17  | ENSGALT00000013157 | CCDC88A  |
| ENSGALT00000019060 |          | ENSGALT00000013221 | COL4A5   |
| ENSGALT00000019108 |          | ENSGALT00000013227 | UACA     |
| ENSGALT00000019136 |          | ENSGALT00000013245 | SRPK2    |
| ENSGALT00000019144 |          | ENSGALT00000013281 |          |
| ENSGALT00000019223 | PDE4DIP  | ENSGALT00000013284 | FAM208B  |
| ENSGALT00000019230 | APOLD1   | ENSGALT00000013336 |          |
| ENSGALT00000019301 | PLBD1    | ENSGALT00000013374 | ANXA4    |
| ENSGALT00000019340 |          | ENSGALT00000013401 |          |
| ENSGALT00000019343 | C7orf55  | ENSGALT00000013428 |          |
| ENSGALT00000019409 | SLC38A6  | ENSGALT00000013447 | COL4A6   |
| ENSGALT00000019464 | DESI1    | ENSGALT00000013464 | TMED3    |
| ENSGALT00000019482 | PMM1     | ENSGALT00000013519 | OBFC1    |
| ENSGALT00000019514 | ZC3H7B   | ENSGALT00000013522 |          |
| ENSGALT00000019566 | SYNPO2   | ENSGALT00000013539 | SLK      |
| ENSGALT00000019581 | SEC24D   | ENSGALT00000013555 | RSBN1L   |
| ENSGALT00000019679 | LARP7    | ENSGALT00000013567 |          |
| ENSGALT00000019698 | OSBPL11  | ENSGALT00000013568 | MAN2A2   |
| ENSGALT00000019783 | KIAA0895 | ENSGALT00000013587 | ATG13    |
| ENSGALT00000019854 |          | ENSGALT00000013608 | TPCN1    |
| ENSGALT00000019895 | PLA2G12A | ENSGALT00000013664 | PIIP5K1  |
| ENSGALT00000019967 | PPP1R17  | ENSGALT00000013673 | CREB3L1  |
| ENSGALT00000020072 | L2HGDH   | ENSGALT00000013679 | MPP4     |
| ENSGALT00000020115 | MANBA    | ENSGALT00000013683 | ANKRD12  |
| ENSGALT00000020165 | SASH1    | ENSGALT00000013704 | DVL3     |
| ENSGALT00000020337 | SBF1     | ENSGALT00000013753 |          |
| ENSGALT00000020354 | MIS18BP1 | ENSGALT00000013794 | SLC35B4  |
| ENSGALT00000020391 |          | ENSGALT00000013808 | PLXND1   |
| ENSGALT00000020402 | KLHL28   | ENSGALT00000013813 |          |
| ENSGALT00000020442 | BRD9     | ENSGALT00000013841 |          |

|                    |          |                    |           |
|--------------------|----------|--------------------|-----------|
| ENSGALT00000020444 | TPPP     | ENSGALT00000013844 |           |
| ENSGALT00000020552 | GKAP1    | ENSGALT00000013858 | THOC2     |
| ENSGALT00000020591 |          | ENSGALT00000013896 |           |
| ENSGALT00000020595 | C9orf3   | ENSGALT00000013924 |           |
| ENSGALT00000020625 |          | ENSGALT00000013962 |           |
| ENSGALT00000020628 | MTERFD3  | ENSGALT00000013979 |           |
| ENSGALT00000020679 | NRSN1    | ENSGALT00000013983 | GPR1      |
| ENSGALT00000020743 |          | ENSGALT00000014023 |           |
| ENSGALT00000020783 | NT5DC3   | ENSGALT00000014035 |           |
| ENSGALT00000021086 |          | ENSGALT00000014115 |           |
| ENSGALT00000021202 | B4GALNT3 | ENSGALT00000014117 |           |
| ENSGALT00000021213 | ERC1     | ENSGALT00000014170 |           |
| ENSGALT00000021258 | MARCH6   | ENSGALT00000014182 | ABI2      |
| ENSGALT00000021282 | BCL2L13  | ENSGALT00000014184 | FLRT3     |
| ENSGALT00000021403 | RERGL    | ENSGALT00000014195 | KIF16B    |
| ENSGALT00000021448 | TMEM245  | ENSGALT00000014214 | PCSK2     |
| ENSGALT00000021521 | BCAT1    | ENSGALT00000014239 | DPH7      |
| ENSGALT00000021578 | SLC39A6  | ENSGALT00000014244 |           |
| ENSGALT00000021611 |          | ENSGALT00000014256 | FAM171A1  |
| ENSGALT00000021647 | LOXL3    | ENSGALT00000014329 | LRRN4     |
| ENSGALT00000021658 | ARHGEF11 | ENSGALT00000014381 | TTLL7     |
| ENSGALT00000021722 |          | ENSGALT00000014420 | PLCB1     |
| ENSGALT00000021812 |          | ENSGALT00000014440 | ZNF618    |
| ENSGALT00000021871 | TMF1     | ENSGALT00000014450 |           |
| ENSGALT00000022020 | TBC1D1   | ENSGALT00000014481 |           |
| ENSGALT00000022062 |          | ENSGALT00000014545 | NEXN      |
| ENSGALT00000022096 |          | ENSGALT00000014566 | C10orf118 |
| ENSGALT00000022114 |          | ENSGALT00000014574 | DBF4      |
| ENSGALT00000022138 | FBXO5    | ENSGALT00000014612 | GNB4      |
| ENSGALT00000022352 | GFPT2    | ENSGALT00000014643 |           |
| ENSGALT00000022435 | HECA     | ENSGALT00000014649 | CPED1     |
| ENSGALT00000022454 |          | ENSGALT00000014661 | SMG5      |
| ENSGALT00000022505 | PCYOX1   | ENSGALT00000014694 | CCDC141   |
| ENSGALT00000022698 | WASF2    | ENSGALT00000014731 |           |
| ENSGALT00000022738 | SSPN     | ENSGALT00000014750 | CDK14     |
| ENSGALT00000022808 | TM7SF3   | ENSGALT00000014752 |           |
| ENSGALT00000022891 | FCGBP    | ENSGALT00000014767 | CD99L2    |
| ENSGALT00000022946 |          | ENSGALT00000014774 | MAN1B1    |
| ENSGALT00000022979 | GPR155   | ENSGALT00000014776 | ZNF106    |
| ENSGALT00000023065 |          | ENSGALT00000014779 | FAM160B1  |
| ENSGALT00000023144 |          | ENSGALT00000014791 |           |
| ENSGALT00000023157 | NECAP1   | ENSGALT00000014827 |           |

|                    |          |                    |          |
|--------------------|----------|--------------------|----------|
| ENSGALT00000023233 |          | ENSGALT00000014832 |          |
| ENSGALT00000023323 |          | ENSGALT00000014902 |          |
| ENSGALT00000023325 | EVI5L    | ENSGALT00000014913 | CHGB     |
| ENSGALT00000023478 |          | ENSGALT00000014951 | FMR1     |
| ENSGALT00000023483 |          | ENSGALT00000014990 |          |
| ENSGALT00000023495 |          | ENSGALT00000015009 |          |
| ENSGALT00000023620 |          | ENSGALT00000015057 | PLD1     |
| ENSGALT00000023630 | NR2F6    | ENSGALT00000015070 |          |
| ENSGALT00000023648 |          | ENSGALT00000015071 | TMEM62   |
| ENSGALT00000023686 | CLCN1    | ENSGALT00000015124 | TELO2    |
| ENSGALT00000023700 | DHX29    | ENSGALT00000015176 |          |
| ENSGALT00000023728 |          | ENSGALT00000015190 |          |
| ENSGALT00000023780 | CWC27    | ENSGALT00000015198 |          |
| ENSGALT00000023833 |          | ENSGALT00000015203 |          |
| ENSGALT00000023839 | SREK1    | ENSGALT00000015210 | TRIM63   |
| ENSGALT00000023918 | HOMER1   | ENSGALT00000015276 |          |
| ENSGALT00000023934 | TTC33    | ENSGALT00000015328 | MYNN     |
| ENSGALT00000023962 | PLCXD3   | ENSGALT00000015332 | BROX     |
| ENSGALT00000023965 | TRDN     | ENSGALT00000015343 | RGS10    |
| ENSGALT00000023976 |          | ENSGALT00000015350 | KIAA0247 |
| ENSGALT00000023982 |          | ENSGALT00000015375 | INPP5F   |
| ENSGALT00000023984 | SMPDL3A  | ENSGALT00000015385 |          |
| ENSGALT00000023995 |          | ENSGALT00000015418 | FNIP2    |
| ENSGALT00000024082 | ENC1     | ENSGALT00000015427 |          |
| ENSGALT00000024095 | ABHD3    | ENSGALT00000015431 |          |
| ENSGALT00000024112 | GTF2E1   | ENSGALT00000015464 | TMA16    |
| ENSGALT00000024149 | LRRC58   | ENSGALT00000015496 |          |
| ENSGALT00000024191 | LYAR     | ENSGALT00000015511 | TMEM192  |
| ENSGALT00000024248 | KIAA1919 | ENSGALT00000015526 |          |
| ENSGALT00000024341 |          | ENSGALT00000015687 |          |
| ENSGALT00000024372 |          | ENSGALT00000015751 |          |
| ENSGALT00000024400 |          | ENSGALT00000015787 |          |
| ENSGALT00000024545 | DTNA     | ENSGALT00000015796 |          |
| ENSGALT00000024590 | CD164    | ENSGALT00000015841 | PCDH18   |
| ENSGALT00000024600 | GPR161   | ENSGALT00000015853 |          |
| ENSGALT00000024611 | COL8A1   | ENSGALT00000015878 |          |
| ENSGALT00000024628 | RB1CC1   | ENSGALT00000015887 |          |
| ENSGALT00000024644 | CMSS1    | ENSGALT00000015909 | NAA15    |
| ENSGALT00000024648 | FILIP1L  | ENSGALT00000015916 | PTPN14   |
| ENSGALT00000024669 | RGMB     | ENSGALT00000015940 |          |
| ENSGALT00000024692 | TFG      | ENSGALT00000015941 | SETD7    |
| ENSGALT00000024704 | ABI3BP   | ENSGALT00000015973 | CCDC173  |

|                    |          |                    |          |
|--------------------|----------|--------------------|----------|
| ENSGALT00000024761 | RTN4IP1  | ENSGALT00000015996 | PPIG     |
| ENSGALT00000024772 | CBLB     | ENSGALT00000015998 | NKTR     |
| ENSGALT00000024777 | BBX      | ENSGALT00000016025 |          |
| ENSGALT00000024828 | HOOK3    | ENSGALT00000016037 |          |
| ENSGALT00000024907 | FKTN     | ENSGALT00000016100 |          |
| ENSGALT00000024944 | IGSF3    | ENSGALT00000016160 |          |
| ENSGALT00000024957 |          | ENSGALT00000016212 | SLC3A1   |
| ENSGALT00000024998 | GGH      | ENSGALT00000016236 | ARHGAP5  |
| ENSGALT00000025000 |          | ENSGALT00000016239 | AKAP6    |
| ENSGALT00000025048 | CSPP1    | ENSGALT00000016289 | BAZ1A    |
| ENSGALT00000025061 | TADA2B   | ENSGALT00000016303 |          |
| ENSGALT00000025114 | HTRA3    | ENSGALT00000016329 | SUPT7L   |
| ENSGALT00000025119 |          | ENSGALT00000016376 | KDM4A    |
| ENSGALT00000025131 | SLCO5A1  | ENSGALT00000016420 | MBIP     |
| ENSGALT00000025157 | ZCCHC9   | ENSGALT00000016432 | DMAP1    |
| ENSGALT00000025160 | BACH2    | ENSGALT00000016435 | ERI3     |
| ENSGALT00000025170 |          | ENSGALT00000016441 |          |
| ENSGALT00000025199 | EDIL3    | ENSGALT00000016446 | SCLT1    |
| ENSGALT00000025304 | KIAA0368 | ENSGALT00000016472 | PLK3     |
| ENSGALT00000025330 |          | ENSGALT00000016500 | SEC23A   |
| ENSGALT00000025350 | SVEP1    | ENSGALT00000016532 | PNN      |
| ENSGALT00000025447 |          | ENSGALT00000016540 | SLC35B2  |
| ENSGALT00000025465 | ADAMTS1  | ENSGALT00000016545 | ZFC3H1   |
| ENSGALT00000025470 | ADAMTS5  | ENSGALT00000016548 | RFX3     |
| ENSGALT00000025493 |          | ENSGALT00000016551 | SLC29A1  |
| ENSGALT00000025494 | USP16    | ENSGALT00000016584 |          |
| ENSGALT00000025499 | LRRCC1   | ENSGALT00000016625 |          |
| ENSGALT00000025551 | PRSS35   | ENSGALT00000016627 | TOE1     |
| ENSGALT00000025559 | PGM3     | ENSGALT00000016690 | LTBP2    |
| ENSGALT00000025624 | SENP6    | ENSGALT00000016704 | AREL1    |
| ENSGALT00000025653 |          | ENSGALT00000016725 | TMEM63B  |
| ENSGALT00000025692 |          | ENSGALT00000016788 | MAST2    |
| ENSGALT00000025750 | PANK2    | ENSGALT00000016792 | NEK9     |
| ENSGALT00000025780 |          | ENSGALT00000016835 |          |
| ENSGALT00000025788 | ITSN1    | ENSGALT00000016850 | GPATCH2L |
| ENSGALT00000025829 | ATRNL    | ENSGALT00000016854 | POMGNT1  |
| ENSGALT00000025839 |          | ENSGALT00000016888 | ESRRB    |
| ENSGALT00000025855 | RRM2B    | ENSGALT00000016892 | VASH1    |
| ENSGALT00000025999 |          | ENSGALT00000016897 | FAM13A   |
| ENSGALT00000026040 | TSNARE1  | ENSGALT00000016908 |          |
| ENSGALT00000026043 | PTP4A3   | ENSGALT00000016916 | TJAP1    |
| ENSGALT00000026044 | GPR20    | ENSGALT00000016923 |          |

|                    |          |                    |          |
|--------------------|----------|--------------------|----------|
| ENSGALT00000026110 | CBS      | ENSGALT00000016945 | TMEM63C  |
| ENSGALT00000026117 |          | ENSGALT00000016973 | POMT2    |
| ENSGALT00000026131 |          | ENSGALT00000016977 | ZNF318   |
| ENSGALT00000026133 |          | ENSGALT00000016985 | TM4SF18  |
| ENSGALT00000026230 | PHF3     | ENSGALT00000017131 | ALDH18A1 |
| ENSGALT00000026264 | DST      | ENSGALT00000017142 |          |
| ENSGALT00000026295 |          | ENSGALT00000017184 |          |
| ENSGALT00000026321 |          | ENSGALT00000017211 |          |
| ENSGALT00000026331 | ICK      | ENSGALT00000017215 | STON2    |
| ENSGALT00000026335 |          | ENSGALT00000017218 | STRN     |
| ENSGALT00000026351 | NDUFB9   | ENSGALT00000017221 | SEL1L    |
| ENSGALT00000026385 |          | ENSGALT00000017295 | ZCCHC11  |
| ENSGALT00000026475 |          | ENSGALT00000017317 | ENPP6    |
| ENSGALT00000026492 | TAF2     | ENSGALT00000017359 | TDP1     |
| ENSGALT00000026827 | ZNF395   | ENSGALT00000017393 | SECISBP2 |
| ENSGALT00000026905 | TRAM2    | ENSGALT00000017399 |          |
| ENSGALT00000026925 |          | ENSGALT00000017485 |          |
| ENSGALT00000027052 |          | ENSGALT00000017502 | TRIP11   |
| ENSGALT00000027119 | FHL2     | ENSGALT00000017630 | BTBD7    |
| ENSGALT00000027129 | GCC2     | ENSGALT00000017687 | ASB2     |
| ENSGALT00000027171 | CUL4A    | ENSGALT00000017695 | PAQR3    |
| ENSGALT00000027237 |          | ENSGALT00000017703 | ANTXR2   |
| ENSGALT00000027373 |          | ENSGALT00000017844 |          |
| ENSGALT00000027403 | RGCC     | ENSGALT00000017877 |          |
| ENSGALT00000027416 | EPST11   | ENSGALT00000017890 | NID1     |
| ENSGALT00000027460 |          | ENSGALT00000017907 | IRF2BP2  |
| ENSGALT00000027514 |          | ENSGALT00000017973 | AK4      |
| ENSGALT00000027526 | NHLRC3   | ENSGALT00000017992 | AFF1     |
| ENSGALT00000027571 |          | ENSGALT00000018021 | COBLL1   |
| ENSGALT00000027598 |          | ENSGALT00000018034 |          |
| ENSGALT00000027738 | GUCY1A2  | ENSGALT00000018056 | KCNH7    |
| ENSGALT00000027822 | PANX1    | ENSGALT00000018061 | CCSAP    |
| ENSGALT00000027863 | NOX4     | ENSGALT00000018067 |          |
| ENSGALT00000027945 | RAD51AP1 | ENSGALT00000018125 | SLC35D1  |
| ENSGALT00000027995 | FAM168A  | ENSGALT00000018137 |          |
| ENSGALT00000028002 | P2RY2    | ENSGALT00000018177 |          |
| ENSGALT00000028035 | STIM1    | ENSGALT00000018181 | HHIPL1   |
| ENSGALT00000029632 | DDI2     | ENSGALT00000018196 |          |
| ENSGALT00000029722 | RNF41    | ENSGALT00000018212 | WIPF3    |
| ENSGALT00000029784 |          | ENSGALT00000018221 | CEP290   |
| ENSGALT00000029798 | KNOP1    | ENSGALT00000018228 | FAM120B  |
| ENSGALT00000029889 | NRGN     | ENSGALT00000018257 | TMTC3    |

|                    |         |                    |          |
|--------------------|---------|--------------------|----------|
| ENSGALT00000030355 | HLCS    | ENSGALT00000018268 |          |
| ENSGALT00000030387 |         | ENSGALT00000018296 | SLC25A29 |
| ENSGALT00000030592 | PICK1   | ENSGALT00000018346 |          |
| ENSGALT00000030620 |         | ENSGALT00000018348 | PLCL2    |
| ENSGALT00000031095 |         | ENSGALT00000018374 |          |
| ENSGALT00000031228 | ACBD7   | ENSGALT00000018386 |          |
| ENSGALT00000031915 | PIGF    | ENSGALT00000018404 | EEA1     |
| ENSGALT00000031945 | TGFB2   | ENSGALT00000018414 | UBE2E1   |
| ENSGALT00000032260 |         | ENSGALT00000018417 | DACT2    |
| ENSGALT00000032288 | MAP9    | ENSGALT00000018542 | TTLL4    |
| ENSGALT00000032362 |         | ENSGALT00000018582 | MSH4     |
| ENSGALT00000032399 |         | ENSGALT00000018598 |          |
| ENSGALT00000032414 | VSIG4   | ENSGALT00000018603 | SLC4A7   |
| ENSGALT00000032565 |         | ENSGALT00000018652 |          |
| ENSGALT00000032587 |         | ENSGALT00000018662 | MFHAS1   |
| ENSGALT00000032650 | MYBPC3  | ENSGALT00000018666 | TNFAIP2  |
| ENSGALT00000032683 |         | ENSGALT00000018667 | GADL1    |
| ENSGALT00000032690 | EFCAB4A | ENSGALT00000018669 |          |
| ENSGALT00000032718 | KCNJ11  | ENSGALT00000018681 | CCNI     |
| ENSGALT00000032836 | KDM4C   | ENSGALT00000018707 | OSBPL10  |
| ENSGALT00000032856 |         | ENSGALT00000018764 |          |
| ENSGALT00000032871 | DIMT1   | ENSGALT00000018770 | ANO10    |
| ENSGALT00000033197 | BTRC    | ENSGALT00000018773 |          |
| ENSGALT00000033354 |         | ENSGALT00000018812 | EAF1     |
| ENSGALT00000033492 |         | ENSGALT00000018822 |          |
| ENSGALT00000033813 |         | ENSGALT00000018857 | PARK2    |
| ENSGALT00000033873 |         | ENSGALT00000018933 | PTPN4    |
| ENSGALT00000034008 |         | ENSGALT00000019041 |          |
| ENSGALT00000034796 |         | ENSGALT00000019050 | AHNAK2   |
| ENSGALT00000034856 | QSOX2   | ENSGALT00000019065 | FNDC1    |
| ENSGALT00000035033 | ANGPTL7 | ENSGALT00000019105 | SEMA5B   |
| ENSGALT00000035194 |         | ENSGALT00000019108 |          |
| ENSGALT00000035212 |         | ENSGALT00000019133 | ACKR4    |
| ENSGALT00000035232 |         | ENSGALT00000019134 |          |
| ENSGALT00000035373 |         | ENSGALT00000019136 |          |
| ENSGALT00000036007 |         | ENSGALT00000019144 |          |
| ENSGALT00000036281 |         | ENSGALT00000019167 |          |
| ENSGALT00000036294 |         | ENSGALT00000019224 |          |
| ENSGALT00000036295 |         | ENSGALT00000019246 |          |
| ENSGALT00000036623 | MTDH    | ENSGALT00000019273 | LZTFL1   |
| ENSGALT00000036642 |         | ENSGALT00000019277 | SYNE2    |
| ENSGALT00000036926 |         | ENSGALT00000019286 | HEG1     |

|                    |          |                    |          |
|--------------------|----------|--------------------|----------|
| ENSGALT00000037229 |          | ENSGALT00000019307 | ANKRD50  |
| ENSGALT00000037436 |          | ENSGALT00000019329 | SACM1L   |
| ENSGALT00000037581 | AKAP12   | ENSGALT00000019330 | TTC26    |
| ENSGALT00000037654 | SSBP2    | ENSGALT00000019340 |          |
| ENSGALT00000037747 | PRPF40A  | ENSGALT00000019393 | ZDHHC3   |
| ENSGALT00000037951 |          | ENSGALT00000019409 | SLC38A6  |
| ENSGALT00000037963 |          | ENSGALT00000019464 | DESI1    |
| ENSGALT00000038163 |          | ENSGALT00000019482 | PMM1     |
| ENSGALT00000038198 |          | ENSGALT00000019514 | ZC3H7B   |
| ENSGALT00000038228 | FXN      | ENSGALT00000019581 | SEC24D   |
| ENSGALT00000038342 |          | ENSGALT00000019611 |          |
| ENSGALT00000038633 |          | ENSGALT00000019620 |          |
| ENSGALT00000038829 |          | ENSGALT00000019637 | SGSM3    |
| ENSGALT00000039021 | AGPAT2   | ENSGALT00000019676 | ARPP21   |
| ENSGALT00000039073 | UPF3B    | ENSGALT00000019679 | LARP7    |
| ENSGALT00000039093 | MLF1     | ENSGALT00000019695 | TRANK1   |
| ENSGALT00000039136 | PCIF1    | ENSGALT00000019698 | OSBPL11  |
| ENSGALT00000039194 | C11orf89 | ENSGALT00000019817 |          |
| ENSGALT00000039213 | CLDN19   | ENSGALT00000019837 | MIEF1    |
| ENSGALT00000039585 |          | ENSGALT00000019895 | PLA2G12A |
| ENSGALT00000039672 |          | ENSGALT00000019898 | MGAT5    |
| ENSGALT00000039878 |          | ENSGALT00000019931 | CCNT2    |
| ENSGALT00000039922 |          | ENSGALT00000019966 |          |
| ENSGALT00000040133 | PLXDC1   | ENSGALT00000020038 | LRRFIP2  |
| ENSGALT00000040414 |          | ENSGALT00000020068 | PPP3CA   |
| ENSGALT00000040421 | RALY     | ENSGALT00000020115 | MANBA    |
| ENSGALT00000040443 | RPUSD2   | ENSGALT00000020121 |          |
| ENSGALT00000040502 |          | ENSGALT00000020165 | SASH1    |
| ENSGALT00000040562 |          | ENSGALT00000020216 |          |
| ENSGALT00000040574 |          | ENSGALT00000020285 | MTHFD1L  |
| ENSGALT00000040680 | SCN4A    | ENSGALT00000020337 | SBF1     |
| ENSGALT00000041120 | FSTL3    | ENSGALT00000020353 |          |
| ENSGALT00000041155 | FAM46B   | ENSGALT00000020354 | MIS18BP1 |
| ENSGALT00000041341 |          | ENSGALT00000020410 |          |
| ENSGALT00000041392 | POGZ     | ENSGALT00000020417 |          |
| ENSGALT00000041398 |          | ENSGALT00000020442 | BRD9     |
|                    |          | ENSGALT00000020444 | TPPP     |
|                    |          | ENSGALT00000020462 | PRPF40A  |
|                    |          | ENSGALT00000020486 | GPD2     |
|                    |          | ENSGALT00000020490 |          |
|                    |          | ENSGALT00000020497 |          |
|                    |          | ENSGALT00000020504 | HMGXB4   |

|                    |          |
|--------------------|----------|
| ENSGALT00000020544 | FRMD3    |
| ENSGALT00000020552 | GKAP1    |
| ENSGALT00000020569 | AGTPBP1  |
| ENSGALT00000020597 | COL15A1  |
| ENSGALT00000020623 | BTBD11   |
| ENSGALT00000020625 |          |
| ENSGALT00000020631 |          |
| ENSGALT00000020647 | CTDP1    |
| ENSGALT00000020679 | NRSN1    |
| ENSGALT00000020695 |          |
| ENSGALT00000020740 |          |
| ENSGALT00000020743 |          |
| ENSGALT00000020831 | SYCP3    |
| ENSGALT00000020885 |          |
| ENSGALT00000020904 | PRPF4B   |
| ENSGALT00000020947 | MYLK4    |
| ENSGALT00000020949 |          |
| ENSGALT00000021064 | MCM4     |
| ENSGALT00000021086 |          |
| ENSGALT00000021101 | KIAA1551 |
| ENSGALT00000021202 | B4GALNT3 |
| ENSGALT00000021213 | ERC1     |
| ENSGALT00000021258 | MARCH6   |
| ENSGALT00000021277 |          |
| ENSGALT00000021280 | SBK2     |
| ENSGALT00000021282 | BCL2L13  |
| ENSGALT00000021284 |          |
| ENSGALT00000021306 | MTRR     |
| ENSGALT00000021320 | ADCY2    |
| ENSGALT00000021439 | PLEKHA5  |
| ENSGALT00000021448 | TMEM245  |
| ENSGALT00000021521 | BCAT1    |
| ENSGALT00000021578 | SLC39A6  |
| ENSGALT00000021611 |          |
| ENSGALT00000021647 | LOXL3    |
| ENSGALT00000021658 | ARHGEF11 |
| ENSGALT00000021722 |          |
| ENSGALT00000021812 |          |
| ENSGALT00000021823 | CMA1     |
| ENSGALT00000021871 | TMF1     |
| ENSGALT00000021898 | SORBS2   |
| ENSGALT00000022062 |          |



|                    |          |
|--------------------|----------|
| ENSGALT00000022114 |          |
| ENSGALT00000022138 | FBXO5    |
| ENSGALT00000022147 | MTUS1    |
| ENSGALT00000022180 | LRRC2    |
| ENSGALT00000022219 | MICU3    |
| ENSGALT00000022257 | UROS     |
| ENSGALT00000022325 | TMEM181  |
| ENSGALT00000022352 | GFPT2    |
| ENSGALT00000022353 |          |
| ENSGALT00000022435 | HECA     |
| ENSGALT00000022499 |          |
| ENSGALT00000022505 | PCYOX1   |
| ENSGALT00000022607 | AHI1     |
| ENSGALT00000022662 | EYA4     |
| ENSGALT00000022698 | WASF2    |
| ENSGALT00000022704 | LAMA2    |
| ENSGALT00000022726 |          |
| ENSGALT00000022738 | SSPN     |
| ENSGALT00000022808 | TM7SF3   |
| ENSGALT00000022820 |          |
| ENSGALT00000022856 | CYB5R3   |
| ENSGALT00000022891 | FCGBP    |
| ENSGALT00000022893 | SUV420H1 |
| ENSGALT00000022946 |          |
| ENSGALT00000022979 | GPR155   |
| ENSGALT00000023043 | TMEM33   |
| ENSGALT00000023090 |          |
| ENSGALT00000023095 | N4BP2    |
| ENSGALT00000023097 |          |
| ENSGALT00000023131 |          |
| ENSGALT00000023144 |          |
| ENSGALT00000023145 | SMIM14   |
| ENSGALT00000023157 | NECAP1   |
| ENSGALT00000023225 |          |
| ENSGALT00000023231 | ZCCHC4   |
| ENSGALT00000023246 |          |
| ENSGALT00000023325 | EVI5L    |
| ENSGALT00000023354 |          |
| ENSGALT00000023478 |          |
| ENSGALT00000023495 |          |
| ENSGALT00000023630 | NR2F6    |
| ENSGALT00000023647 | RHOBTB3  |

|                    |          |
|--------------------|----------|
| ENSGALT00000023680 |          |
| ENSGALT00000023694 | MEGF10   |
| ENSGALT00000023700 | DHX29    |
| ENSGALT00000023723 | SLC38A9  |
| ENSGALT00000023728 |          |
| ENSGALT00000023753 |          |
| ENSGALT00000023780 | CWC27    |
| ENSGALT00000023833 |          |
| ENSGALT00000023834 | WARS2    |
| ENSGALT00000023839 | SREK1    |
| ENSGALT00000023868 | PIK3R1   |
| ENSGALT00000023918 | HOMER1   |
| ENSGALT00000023921 | EMILIN2  |
| ENSGALT00000023962 | PLCXD3   |
| ENSGALT00000023965 | TRDN     |
| ENSGALT00000023976 |          |
| ENSGALT00000023982 |          |
| ENSGALT00000023984 | SMPDL3A  |
| ENSGALT00000023995 |          |
| ENSGALT00000024023 | CEP85L   |
| ENSGALT00000024049 | HSPB3    |
| ENSGALT00000024082 | ENC1     |
| ENSGALT00000024112 | GTF2E1   |
| ENSGALT00000024149 | LRRC58   |
| ENSGALT00000024162 |          |
| ENSGALT00000024169 | RBBP8    |
| ENSGALT00000024191 | LYAR     |
| ENSGALT00000024248 | KIAA1919 |
| ENSGALT00000024267 |          |
| ENSGALT00000024268 | KIAA2026 |
| ENSGALT00000024321 | ARHGAP31 |
| ENSGALT00000024341 |          |
| ENSGALT00000024346 | ZBTB20   |
| ENSGALT00000024372 |          |
| ENSGALT00000024382 | ZNF521   |
| ENSGALT00000024398 |          |
| ENSGALT00000024400 |          |
| ENSGALT00000024483 |          |
| ENSGALT00000024492 |          |
| ENSGALT00000024497 | GAREM    |
| ENSGALT00000024590 | CD164    |
| ENSGALT00000024600 | GPR161   |

|                    |         |
|--------------------|---------|
| ENSGALT00000024605 |         |
| ENSGALT00000024611 | COL8A1  |
| ENSGALT00000024628 | RB1CC1  |
| ENSGALT00000024648 | FILIP1L |
| ENSGALT00000024669 | RGMB    |
| ENSGALT00000024704 | ABI3BP  |
| ENSGALT00000024769 |         |
| ENSGALT00000024772 | CBLB    |
| ENSGALT00000024777 | BBX     |
| ENSGALT00000024811 | PHLDB2  |
| ENSGALT00000024828 | HOOK3   |
| ENSGALT00000024855 | PROS1   |
| ENSGALT00000024861 | ARL13B  |
| ENSGALT00000024871 | PENK    |
| ENSGALT00000024901 | MPZL1   |
| ENSGALT00000024931 | PTGFRN  |
| ENSGALT00000024944 | IGSF3   |
| ENSGALT00000024962 |         |
| ENSGALT00000024965 | ASPH    |
| ENSGALT00000024970 |         |
| ENSGALT00000024998 | GGH     |
| ENSGALT00000025000 |         |
| ENSGALT00000025002 | GBE1    |
| ENSGALT00000025048 | CSPP1   |
| ENSGALT00000025106 |         |
| ENSGALT00000025114 | HTRA3   |
| ENSGALT00000025119 |         |
| ENSGALT00000025131 | SLCO5A1 |
| ENSGALT00000025157 | ZCCHC9  |
| ENSGALT00000025170 |         |
| ENSGALT00000025199 | EDIL3   |
| ENSGALT00000025264 | FAM193A |
| ENSGALT00000025294 | NRIP1   |
| ENSGALT00000025295 | UGCG    |
| ENSGALT00000025296 |         |
| ENSGALT00000025302 |         |
| ENSGALT00000025330 |         |
| ENSGALT00000025350 | SVEP1   |
| ENSGALT00000025361 |         |
| ENSGALT00000025428 |         |
| ENSGALT00000025446 | PM20D2  |
| ENSGALT00000025447 |         |

|                    |           |
|--------------------|-----------|
| ENSGALT00000025494 | USP16     |
| ENSGALT00000025499 | LRRCC1    |
| ENSGALT00000025504 | CA13      |
| ENSGALT00000025521 |           |
| ENSGALT00000025528 | NT5E      |
| ENSGALT00000025551 | PRSS35    |
| ENSGALT00000025559 | PGM3      |
| ENSGALT00000025595 | HUNK      |
| ENSGALT00000025610 | PHIP      |
| ENSGALT00000025624 | SENP6     |
| ENSGALT00000025628 | FILIP1    |
| ENSGALT00000025653 |           |
| ENSGALT00000025680 | PAXBP1    |
| ENSGALT00000025688 | THNSL2    |
| ENSGALT00000025692 |           |
| ENSGALT00000025742 | DPY19L4   |
| ENSGALT00000025775 | FASTKD5   |
| ENSGALT00000025788 | ITSN1     |
| ENSGALT00000025829 | ATRN      |
| ENSGALT00000025839 |           |
| ENSGALT00000025841 |           |
| ENSGALT00000025855 | RRM2B     |
| ENSGALT00000025859 | TTC3      |
| ENSGALT00000025873 |           |
| ENSGALT00000025882 | BRWD1     |
| ENSGALT00000025913 | ABRA      |
| ENSGALT00000025927 | RAB11FIP5 |
| ENSGALT00000026001 | RHPN1     |
| ENSGALT00000026021 | C2CD2     |
| ENSGALT00000026026 | PSCA      |
| ENSGALT00000026044 | GPR20     |
| ENSGALT00000026088 | WDR4      |
| ENSGALT00000026104 |           |
| ENSGALT00000026133 |           |
| ENSGALT00000026194 |           |
| ENSGALT00000026211 | RPGR      |
| ENSGALT00000026230 | PHF3      |
| ENSGALT00000026245 |           |
| ENSGALT00000026250 |           |
| ENSGALT00000026253 | BEND6     |
| ENSGALT00000026264 | DST       |
| ENSGALT00000026321 |           |

|                    |          |
|--------------------|----------|
| ENSGALT00000026331 | ICK      |
| ENSGALT00000026385 |          |
| ENSGALT00000026390 | FBXO25   |
| ENSGALT00000026404 |          |
| ENSGALT00000026441 | CNKSR2   |
| ENSGALT00000026483 | CXorf23  |
| ENSGALT00000026486 | ASAP2    |
| ENSGALT00000026492 | TAF2     |
| ENSGALT00000026498 | MAP3K15  |
| ENSGALT00000026525 | RRM2     |
| ENSGALT00000026569 | SMC6     |
| ENSGALT00000026609 | ATAD2B   |
| ENSGALT00000026630 | ZNF512   |
| ENSGALT00000026711 |          |
| ENSGALT00000026743 |          |
| ENSGALT00000026856 | MXRA5    |
| ENSGALT00000026872 | XKR6     |
| ENSGALT00000026878 |          |
| ENSGALT00000026905 | TRAM2    |
| ENSGALT00000026909 |          |
| ENSGALT00000026922 |          |
| ENSGALT00000026925 |          |
| ENSGALT00000026992 | JADE3    |
| ENSGALT00000026993 |          |
| ENSGALT00000027052 |          |
| ENSGALT00000027129 | GCC2     |
| ENSGALT00000027168 |          |
| ENSGALT00000027171 | CUL4A    |
| ENSGALT00000027208 |          |
| ENSGALT00000027231 |          |
| ENSGALT00000027237 |          |
| ENSGALT00000027243 | METTL21C |
| ENSGALT00000027245 | TPP2     |
| ENSGALT00000027273 | DOCK9    |
| ENSGALT00000027292 | RAP2A    |
| ENSGALT00000027391 |          |
| ENSGALT00000027416 | EPSTI1   |
| ENSGALT00000027439 | ZC3H13   |
| ENSGALT00000027454 | NUDT15   |
| ENSGALT00000027462 | RCBTB2   |
| ENSGALT00000027478 | TRIM13   |
| ENSGALT00000027488 | INTS6    |

|                    |          |
|--------------------|----------|
| ENSGALT00000027514 |          |
| ENSGALT00000027526 | NHLRC3   |
| ENSGALT00000027566 | STARD13  |
| ENSGALT00000027571 |          |
| ENSGALT00000027575 | N4BP2L1  |
| ENSGALT00000027616 | LNX2     |
| ENSGALT00000027620 |          |
| ENSGALT00000027648 | MTMR6    |
| ENSGALT00000027657 |          |
| ENSGALT00000027658 | SACS     |
| ENSGALT00000027676 |          |
| ENSGALT00000027690 |          |
| ENSGALT00000027709 |          |
| ENSGALT00000027716 | NPAT     |
| ENSGALT00000027722 |          |
| ENSGALT00000027735 | CWF19L2  |
| ENSGALT00000027799 | MAML2    |
| ENSGALT00000027858 | FOLH1    |
| ENSGALT00000027863 | NOX4     |
| ENSGALT00000027884 | PCF11    |
| ENSGALT00000027945 | RAD51AP1 |
| ENSGALT00000027985 |          |
| ENSGALT00000027995 | FAM168A  |
| ENSGALT00000028001 |          |
| ENSGALT00000028002 | P2RY2    |
| ENSGALT00000028034 |          |
| ENSGALT00000028035 | STIM1    |
| ENSGALT00000028064 | LURAP1   |
| ENSGALT00000028268 | GPD1     |
| ENSGALT00000028271 | ANKRD46  |
| ENSGALT00000029552 |          |
| ENSGALT00000029632 | DDI2     |
| ENSGALT00000029798 | KNOP1    |
| ENSGALT00000029912 |          |
| ENSGALT00000030355 | HLCS     |
| ENSGALT00000030405 |          |
| ENSGALT00000030447 | DPT      |
| ENSGALT00000030521 |          |
| ENSGALT00000030592 | PICK1    |
| ENSGALT00000030811 |          |
| ENSGALT00000030862 | PAG1     |
| ENSGALT00000030930 |          |

|                    |          |
|--------------------|----------|
| ENSGALT00000031095 |          |
| ENSGALT00000031116 | RP9      |
| ENSGALT00000031228 | ACBD7    |
| ENSGALT00000031337 | GLDN     |
| ENSGALT00000031388 | CHAD     |
| ENSGALT00000031518 |          |
| ENSGALT00000031528 | CLIC5    |
| ENSGALT00000031751 | KIAA0408 |
| ENSGALT00000031776 |          |
| ENSGALT00000031915 | PIGF     |
| ENSGALT00000031945 | TGFB2    |
| ENSGALT00000032107 | PDGFRL   |
| ENSGALT00000032235 |          |
| ENSGALT00000032288 | MAP9     |
| ENSGALT00000032565 |          |
| ENSGALT00000032623 |          |
| ENSGALT00000032650 | MYBPC3   |
| ENSGALT00000032683 |          |
| ENSGALT00000032690 | EFCAB4A  |
| ENSGALT00000032768 | TOPORS   |
| ENSGALT00000032816 | NMRK1    |
| ENSGALT00000032836 | KDM4C    |
| ENSGALT00000032856 |          |
| ENSGALT00000032871 | DIMT1    |
| ENSGALT00000033197 | BTRC     |
| ENSGALT00000033265 |          |
| ENSGALT00000033345 | LRRC8D   |
| ENSGALT00000033354 |          |
| ENSGALT00000033492 |          |
| ENSGALT00000033524 | AURKA    |
| ENSGALT00000033559 | RAB31    |
| ENSGALT00000033666 | S100B    |
| ENSGALT00000033697 |          |
| ENSGALT00000033717 |          |
| ENSGALT00000034212 |          |
| ENSGALT00000034383 |          |
| ENSGALT00000034402 | RNF26    |
| ENSGALT00000034432 | B3GNT9   |
| ENSGALT00000034621 |          |
| ENSGALT00000034695 |          |
| ENSGALT00000034743 |          |
| ENSGALT00000034751 |          |

|                    |          |
|--------------------|----------|
| ENSGALT00000034784 | TMEM8C   |
| ENSGALT00000034796 |          |
| ENSGALT00000034799 | PRR11    |
| ENSGALT00000034856 | QSOX2    |
| ENSGALT00000035033 | ANGPTL7  |
| ENSGALT00000035194 |          |
| ENSGALT00000035245 |          |
| ENSGALT00000035373 |          |
| ENSGALT00000035378 |          |
| ENSGALT00000036037 |          |
| ENSGALT00000036371 |          |
| ENSGALT00000036503 |          |
| ENSGALT00000036592 |          |
| ENSGALT00000036623 | MTDH     |
| ENSGALT00000036640 |          |
| ENSGALT00000036642 |          |
| ENSGALT00000036897 | HHLA2    |
| ENSGALT00000037148 |          |
| ENSGALT00000037170 |          |
| ENSGALT00000037229 |          |
| ENSGALT00000037476 |          |
| ENSGALT00000037581 | AKAP12   |
| ENSGALT00000037604 |          |
| ENSGALT00000037615 | CDV3     |
| ENSGALT00000037654 | SSBP2    |
| ENSGALT00000037674 |          |
| ENSGALT00000037747 | PRPF40A  |
| ENSGALT00000037892 |          |
| ENSGALT00000037963 |          |
| ENSGALT00000038145 |          |
| ENSGALT00000038163 |          |
| ENSGALT00000038198 |          |
| ENSGALT00000038252 |          |
| ENSGALT00000038316 |          |
| ENSGALT00000038660 |          |
| ENSGALT00000038751 |          |
| ENSGALT00000039073 | UPF3B    |
| ENSGALT00000039082 |          |
| ENSGALT00000039194 | C11orf89 |
| ENSGALT00000039213 | CLDN19   |
| ENSGALT00000039224 |          |
| ENSGALT00000039585 |          |



|                    |         |
|--------------------|---------|
| ENSGALT00000039617 |         |
| ENSGALT00000039619 |         |
| ENSGALT00000039676 | IER5    |
| ENSGALT00000039690 |         |
| ENSGALT00000039703 |         |
| ENSGALT00000039833 |         |
| ENSGALT00000039989 | MEGF9   |
| ENSGALT00000040104 | RCN1    |
| ENSGALT00000040133 | PLXDC1  |
| ENSGALT00000040136 |         |
| ENSGALT00000040176 | PLEKHG4 |
| ENSGALT00000040414 |         |
| ENSGALT00000040502 |         |
| ENSGALT00000040550 | PI4KB   |
| ENSGALT00000040562 |         |
| ENSGALT00000040574 |         |
| ENSGALT00000040656 | SMCR8   |
| ENSGALT00000040660 |         |
| ENSGALT00000040996 | STC2    |
| ENSGALT00000041120 | FSTL3   |
| ENSGALT00000041141 |         |
| ENSGALT00000041341 |         |
| ENSGALT00000041392 | POGZ    |
| ENSGALT00000041398 |         |

**DEGs between RJF and WL**

**DEGs between CH and AA**

| <b>Ensembl Transcript ID</b> | <b>HGNC symbol</b> | <b>Ensembl Transcript ID</b> | <b>HGNC symbol</b> |
|------------------------------|--------------------|------------------------------|--------------------|
| ENSGALT00000029647           |                    | ENSGALT00000000136           | ANTXR1             |
| ENSGALT00000000407           |                    | ENSGALT00000000188           |                    |
| ENSGALT00000040207           |                    | ENSGALT00000000518           | SLC25A3<br>7       |
| ENSGALT00000000555           |                    | ENSGALT00000000898           |                    |
| ENSGALT00000000587           |                    | ENSGALT00000001398           |                    |
| ENSGALT00000014902           |                    | ENSGALT00000001427           |                    |
| ENSGALT00000014829           | DPP7               | ENSGALT00000001603           | ELN                |
| ENSGALT00000000671           | LONP1              | ENSGALT00000001871           |                    |
| ENSGALT00000014774           | MAN1B1             | ENSGALT00000002172           | YDJC               |
| ENSGALT00000001420           |                    | ENSGALT00000002291           |                    |
| ENSGALT00000014744           |                    | ENSGALT00000002490           |                    |
| ENSGALT00000000806           | RANBP3             | ENSGALT00000002566           | SETBP1             |
| ENSGALT00000014675           |                    | ENSGALT00000002567           |                    |
| ENSGALT00000014665           | TRAF2              | ENSGALT00000002828           | SH2B2              |

|                    |         |                    |               |
|--------------------|---------|--------------------|---------------|
| ENSGALT00000014657 |         | ENSGALT00000003038 |               |
| ENSGALT00000001029 |         | ENSGALT00000003157 | AHCY          |
| ENSGALT00000014614 | RABL6   | ENSGALT00000003449 |               |
| ENSGALT00000001477 | MAP2K4  | ENSGALT00000003570 |               |
| ENSGALT00000023397 |         | ENSGALT00000003649 |               |
| ENSGALT00000002041 |         | ENSGALT00000004015 | PCDH12        |
| ENSGALT00000002095 |         | ENSGALT00000004115 |               |
| ENSGALT00000014372 | SLC31A1 | ENSGALT00000004499 | SARDH         |
| ENSGALT00000002349 |         | ENSGALT00000004573 | ALPK2         |
| ENSGALT00000002374 |         | ENSGALT00000004876 |               |
| ENSGALT00000002490 |         | ENSGALT00000005088 | TSPO2         |
| ENSGALT00000002733 | MFSD11  | ENSGALT00000005219 | ADAMTS<br>12  |
| ENSGALT00000002759 |         | ENSGALT00000005294 |               |
| ENSGALT00000002784 |         | ENSGALT00000005581 | ARRDC2        |
| ENSGALT00000002885 | PRPSAP1 | ENSGALT00000005664 |               |
| ENSGALT00000021823 | CMA1    | ENSGALT00000005829 |               |
| ENSGALT00000014039 |         | ENSGALT00000005844 | PAPSS2        |
| ENSGALT00000021812 |         | ENSGALT00000005940 |               |
| ENSGALT00000003381 |         | ENSGALT00000006575 |               |
| ENSGALT00000003433 |         | ENSGALT00000006617 | SLC16A6       |
| ENSGALT00000003475 |         | ENSGALT00000006667 |               |
| ENSGALT00000011643 |         | ENSGALT00000007467 |               |
| ENSGALT00000002831 |         | ENSGALT00000007566 |               |
| ENSGALT00000003804 | SAP30BP | ENSGALT00000007643 | TNFAIP8<br>L3 |
| ENSGALT00000004306 |         | ENSGALT00000007669 | EPB42         |
| ENSGALT00000004555 |         | ENSGALT00000007728 | APLNR         |
| ENSGALT00000004579 | NOTUM   | ENSGALT00000008756 | SDR42E1       |
| ENSGALT00000034713 | TOM1L1  | ENSGALT00000009328 | SEPT2         |
| ENSGALT00000004865 |         | ENSGALT00000009337 | BCAR3         |
| ENSGALT00000004896 | PCTP    | ENSGALT00000009416 | ALOX5         |
| ENSGALT00000005054 |         | ENSGALT00000009723 |               |
| ENSGALT00000034695 |         | ENSGALT00000009864 |               |
| ENSGALT00000005180 | SUZ12   | ENSGALT00000010002 |               |
| ENSGALT00000001193 |         | ENSGALT00000010763 |               |
| ENSGALT00000008122 |         | ENSGALT00000010875 |               |
| ENSGALT00000001236 | DOT1L   | ENSGALT00000010963 | KLHDC8<br>B   |
| ENSGALT00000001472 | AP3D1   | ENSGALT00000011206 | BAIAP2        |
| ENSGALT00000005503 | ERN1    | ENSGALT00000011644 |               |
| ENSGALT00000034662 | TEX2    | ENSGALT00000011897 | MAP3K8        |

|                     |          |                    |              |
|---------------------|----------|--------------------|--------------|
| ENSGALT0000007962   | SLC27A4  | ENSGALT00000012048 |              |
| ENSGALT0000006110   | MKNK2    | ENSGALT00000012483 |              |
| ENSGALT0000007881   | COQ4     | ENSGALT00000012861 | PRR5L        |
| ENSGALT00000001502  | BTBD2    | ENSGALT00000013006 |              |
| ENSGALT00000005647  | SMURF2   | ENSGALT00000013519 | OBFC1        |
| ENSGALT00000005672  |          | ENSGALT00000013524 |              |
| ENSGALT00000005785  |          | ENSGALT00000013679 | MPP4         |
| ENSGALT00000023521  |          | ENSGALT00000013683 | ANKRD1<br>2  |
| ENSGALT00000029695  | ABHD17A  | ENSGALT00000013844 |              |
| ENSGALT00000001557  |          | ENSGALT00000013978 |              |
| ENSGALT00000007637  |          | ENSGALT00000014372 | SLC31A1      |
| ENSGALT00000007631  | PTGES2   | ENSGALT00000014545 | NEXN         |
| ENSGALT00000007603  |          | ENSGALT00000014694 | CCDC14<br>1  |
| ENSGALT00000005864  |          | ENSGALT00000014902 |              |
| ENSGALT00000006288  |          | ENSGALT00000015142 |              |
| ENSGALT00000001723  | UBXN6    | ENSGALT00000015210 | TRIM63       |
| ENSGALT00000006617  | SLC16A6  | ENSGALT00000015253 |              |
| ENSGALT00000006701  | WIP1     | ENSGALT00000015414 |              |
| ENSGALT00000035511  | PLIN3    | ENSGALT00000015566 |              |
| ENSGALT00000038499  | CDC42EP4 | ENSGALT00000015790 |              |
| ENSGALT00000002009  |          | ENSGALT00000016017 |              |
| ENSGALT00000029664  |          | ENSGALT00000016908 |              |
| ENSGALT00000007424  | ZER1     | ENSGALT00000016985 | TM4SF18      |
| ENSGALT00000002098  | POLRMT   | ENSGALT00000017109 | BEND5        |
| ENSGALT00000007292  | NPLOC4   | ENSGALT00000017560 |              |
| ENSGALT00000007279  | LRRC8A   | ENSGALT00000017724 |              |
| ENSGALT00000011145  | SLC38A10 | ENSGALT00000018296 | SLC25A2<br>9 |
| ENSGALT00000007386  |          | ENSGALT00000018392 |              |
| ENSGALT00000007251  |          | ENSGALT00000018404 | EEA1         |
| ENSGALT00000007108  | CRAT     | ENSGALT00000018472 | TMCC3        |
| ENSGALT00000003154  | TMEM259  | ENSGALT00000019065 | FNDC1        |
| ENSGALT00000006623  |          | ENSGALT00000019137 | TMEM10<br>8  |
| ENSGALT00000006504  | FNBP1    | ENSGALT00000019167 |              |
| ENSGALT000000032738 |          | ENSGALT00000019187 |              |
| ENSGALT00000019966  |          | ENSGALT00000019230 | APOLD1       |
| ENSGALT00000005350  | SPTB     | ENSGALT00000019766 |              |
| ENSGALT00000006004  | PPAPDC3  | ENSGALT00000020038 | LRRFIP2      |
| ENSGALT00000005992  | PRRC2B   | ENSGALT00000020121 |              |

|                    |          |                    |              |
|--------------------|----------|--------------------|--------------|
| ENSGALT00000011703 |          | ENSGALT00000020184 |              |
| ENSGALT00000013753 |          | ENSGALT00000020417 |              |
| ENSGALT00000011734 | PCYT2    | ENSGALT00000020490 |              |
| ENSGALT00000011818 |          | ENSGALT00000020623 | BTBD11       |
| ENSGALT00000004127 | SLC25A42 | ENSGALT00000020631 |              |
| ENSGALT00000005537 | TSC1     | ENSGALT00000020714 |              |
| ENSGALT00000038280 | EPN3     | ENSGALT00000020759 |              |
| ENSGALT00000004779 | ARMC6    | ENSGALT00000020791 |              |
| ENSGALT00000004856 | HOMER3   | ENSGALT00000021101 | KIAA155<br>1 |
| ENSGALT00000031388 | CHAD     | ENSGALT00000021403 | RERGL        |
| ENSGALT00000005397 | RALGDS   | ENSGALT00000021880 |              |
| ENSGALT00000012523 | NAT9     | ENSGALT00000021898 | SORBS2       |
| ENSGALT00000005285 |          | ENSGALT00000022087 | NR4A3        |
| ENSGALT00000012560 |          | ENSGALT00000022454 |              |
| ENSGALT00000005056 |          | ENSGALT00000022662 | EYA4         |
| ENSGALT00000012890 |          | ENSGALT00000023131 |              |
| ENSGALT00000005016 | REXO4    | ENSGALT00000023965 | TRDN         |
| ENSGALT00000005192 | COMP     | ENSGALT00000024023 | CEP85L       |
| ENSGALT00000012930 |          | ENSGALT00000024049 | HSPB3        |
| ENSGALT00000005309 |          | ENSGALT00000024095 | ABHD3        |
| ENSGALT00000007496 |          | ENSGALT00000024577 | NME7         |
| ENSGALT00000007466 |          | ENSGALT00000024673 | SESN1        |
| ENSGALT00000005348 | LSM4     | ENSGALT00000024871 | PENK         |
| ENSGALT00000013002 | SLC25A19 | ENSGALT00000024905 |              |
| ENSGALT00000005355 |          | ENSGALT00000024931 | PTGFRN       |
| ENSGALT00000006156 |          | ENSGALT00000024944 | IGSF3        |
| ENSGALT00000040443 | RPUSD2   | ENSGALT00000025106 |              |
| ENSGALT00000013018 | KIAA0195 | ENSGALT00000025338 |              |
| ENSGALT00000013031 | CASKIN2  | ENSGALT00000025383 |              |
| ENSGALT00000001658 |          | ENSGALT00000025610 | PHIP         |
| ENSGALT00000005424 |          | ENSGALT00000025628 | FILIP1       |
| ENSGALT00000006955 |          | ENSGALT00000025999 |              |
| ENSGALT00000023312 | RETSAT   | ENSGALT00000026026 | PSCA         |
| ENSGALT00000004226 | BRD3     | ENSGALT00000026040 | TSNARE<br>1  |
| ENSGALT00000004139 | RXRA     | ENSGALT00000026104 |              |
| ENSGALT00000005655 |          | ENSGALT00000026117 |              |
| ENSGALT00000039021 | AGPAT2   | ENSGALT00000026343 |              |
| ENSGALT00000006685 |          | ENSGALT00000026525 | RRM2         |
| ENSGALT00000006531 |          | ENSGALT00000026909 |              |
| ENSGALT00000040276 | NAV2     | ENSGALT00000026922 |              |

|                    |         |                    |             |
|--------------------|---------|--------------------|-------------|
| ENSGALT0000006317  |         | ENSGALT00000027071 | AFF3        |
| ENSGALT0000003726  | SEC16A  | ENSGALT00000027168 |             |
| ENSGALT0000005994  |         | ENSGALT00000027194 | IRS2        |
| ENSGALT0000006018  | SLC35E1 | ENSGALT00000027403 | RGCC        |
| ENSGALT0000003018  |         | ENSGALT00000027738 | GUCY1A<br>2 |
| ENSGALT0000006230  | EPS15L1 | ENSGALT00000027822 | PANX1       |
| ENSGALT00000040172 |         | ENSGALT00000027985 |             |
| ENSGALT00000019825 |         | ENSGALT00000028002 | P2RY2       |
| ENSGALT00000031814 |         | ENSGALT00000029461 |             |
| ENSGALT00000019813 | ELP4    | ENSGALT00000029552 |             |
| ENSGALT00000040104 | RCN1    | ENSGALT00000031372 | ACER3       |
| ENSGALT0000006310  |         | ENSGALT00000031388 | CHAD        |
| ENSGALT00000002629 |         | ENSGALT00000031518 |             |
| ENSGALT00000039281 | TPM4    | ENSGALT00000032336 | NSDHL       |
| ENSGALT00000019109 |         | ENSGALT00000032587 |             |
| ENSGALT00000008620 |         | ENSGALT00000032951 | P2RY14      |
| ENSGALT00000008698 |         | ENSGALT00000033524 | AURKA       |
| ENSGALT00000008731 | PARVA   | ENSGALT00000033697 |             |
| ENSGALT00000008888 | MICAL2  | ENSGALT00000034001 |             |
| ENSGALT00000006684 | DPP9    | ENSGALT00000034078 |             |
| ENSGALT00000008932 |         | ENSGALT00000034317 |             |
| ENSGALT00000008962 |         | ENSGALT00000034319 |             |
| ENSGALT00000039859 |         | ENSGALT00000034713 | TOM1L1      |
| ENSGALT00000006779 |         | ENSGALT00000035373 |             |
| ENSGALT00000009054 |         | ENSGALT00000035848 |             |
| ENSGALT00000009088 | ADM     | ENSGALT00000036018 | EVA1B       |
| ENSGALT00000009326 | IPO7    | ENSGALT00000036371 |             |
| ENSGALT00000009336 |         | ENSGALT00000038194 |             |
| ENSGALT00000002236 |         | ENSGALT00000038916 |             |
| ENSGALT00000009504 |         | ENSGALT00000039082 |             |
| ENSGALT00000034894 | STOM    | ENSGALT00000039301 | PDZD7       |
| ENSGALT00000009649 |         | ENSGALT00000039703 |             |
| ENSGALT00000034898 |         | ENSGALT00000039878 |             |
| ENSGALT00000009745 | CYP2R1  | ENSGALT00000040564 |             |
| ENSGALT00000009835 |         | ENSGALT00000040996 | STC2        |
| ENSGALT00000001877 |         |                    |             |
| ENSGALT00000001117 | PLA2G15 |                    |             |
| ENSGALT00000001294 | GINS3   |                    |             |
| ENSGALT00000032718 | KCNJ11  |                    |             |
| ENSGALT00000001304 |         |                    |             |
| ENSGALT00000001320 |         |                    |             |

|                     |          |
|---------------------|----------|
| ENSGALT00000001489  | MMP15    |
| ENSGALT00000001657  |          |
| ENSGALT00000001570  | OLFML2A  |
| ENSGALT000000010128 | HPS5     |
| ENSGALT00000022076  | CCDC102A |
| ENSGALT00000001496  | ARPC5L   |
| ENSGALT00000001476  |          |
| ENSGALT000000010207 |          |
| ENSGALT00000001402  |          |
| ENSGALT00000001330  | RALGPS1  |
| ENSGALT000000010405 |          |
| ENSGALT00000001362  |          |
| ENSGALT00000002191  | RANBP10  |
| ENSGALT00000002429  |          |
| ENSGALT00000002498  | EDC4     |
| ENSGALT000000010585 |          |
| ENSGALT000000010620 |          |
| ENSGALT000000039194 | C11orf89 |
| ENSGALT000000010676 |          |
| ENSGALT000000010774 | MOB2     |
| ENSGALT000000010998 | AP2A2    |
| ENSGALT00000003282  | TPPP3    |
| ENSGALT00000003500  |          |
| ENSGALT00000003653  |          |
| ENSGALT00000003894  | MTSS1L   |
| ENSGALT000000040057 |          |
| ENSGALT000000011181 |          |
| ENSGALT000000011466 |          |
| ENSGALT000000011547 |          |
| ENSGALT000000011621 |          |
| ENSGALT00000004497  |          |
| ENSGALT000000017615 | DTX4     |
| ENSGALT000000011877 | MED19    |
| ENSGALT000000038761 | RTN4RL2  |
| ENSGALT00000004875  |          |
| ENSGALT00000004906  | AMFR     |
| ENSGALT00000005176  |          |
| ENSGALT00000005216  | MBTPS1   |
| ENSGALT000000010684 | FBXO3    |
| ENSGALT00000005262  | OSGIN1   |
| ENSGALT00000005367  | NFATC3   |
| ENSGALT00000023364  | CAT      |

|                    |          |
|--------------------|----------|
| ENSGALT00000012705 |          |
| ENSGALT00000012829 | COMMD9   |
| ENSGALT00000012888 | TRAF6    |
| ENSGALT00000005659 |          |
| ENSGALT00000005666 |          |
| ENSGALT00000013052 |          |
| ENSGALT00000022785 |          |
| ENSGALT00000030003 |          |
| ENSGALT00000013121 |          |
| ENSGALT00000034245 |          |
| ENSGALT00000006188 | ZNF423   |
| ENSGALT00000006236 | SIAH1    |
| ENSGALT00000006378 |          |
| ENSGALT00000013147 |          |
| ENSGALT00000013183 |          |
| ENSGALT00000013191 |          |
| ENSGALT00000032650 | MYBPC3   |
| ENSGALT00000006611 | GPT2     |
| ENSGALT00000013356 |          |
| ENSGALT00000006871 | MYLK3    |
| ENSGALT00000006929 |          |
| ENSGALT00000013396 |          |
| ENSGALT00000013425 |          |
| ENSGALT00000006976 |          |
| ENSGALT00000007136 |          |
| ENSGALT00000007149 |          |
| ENSGALT00000007159 |          |
| ENSGALT00000013551 |          |
| ENSGALT00000013587 | ATG13    |
| ENSGALT00000035181 | PFKFB1   |
| ENSGALT00000007751 | LRP3     |
| ENSGALT00000007771 |          |
| ENSGALT00000013748 |          |
| ENSGALT00000007832 |          |
| ENSGALT00000013933 |          |
| ENSGALT00000013981 | NDUFAF1  |
| ENSGALT00000007938 | KIAA0355 |
| ENSGALT00000014145 | MAPKBP1  |
| ENSGALT00000008241 | FAM96B   |
| ENSGALT00000008251 |          |
| ENSGALT00000014672 | TMEM87A  |
| ENSGALT00000039221 |          |

|                    |          |
|--------------------|----------|
| ENSGALT0000008465  |          |
| ENSGALT00000039170 |          |
| ENSGALT00000014809 |          |
| ENSGALT00000015102 | ELMSAN1  |
| ENSGALT00000038149 |          |
| ENSGALT00000015198 |          |
| ENSGALT00000029669 | HOXC10   |
| ENSGALT00000015283 |          |
| ENSGALT00000022454 |          |
| ENSGALT00000015312 |          |
| ENSGALT00000015350 | KIAA0247 |
| ENSGALT00000015368 |          |
| ENSGALT00000028069 |          |
| ENSGALT00000008792 |          |
| ENSGALT00000008794 |          |
| ENSGALT00000008799 |          |
| ENSGALT00000015576 |          |
| ENSGALT00000008821 |          |
| ENSGALT00000015588 |          |
| ENSGALT00000033760 |          |
| ENSGALT00000015687 |          |
| ENSGALT00000015691 | EMC7     |
| ENSGALT00000015856 | FAM98B   |
| ENSGALT00000015965 | ZNF770   |
| ENSGALT00000016005 |          |
| ENSGALT00000016127 |          |
| ENSGALT00000028346 |          |
| ENSGALT00000016156 | AP4S1    |
| ENSGALT00000009186 | MTHFSD   |
| ENSGALT00000009243 |          |
| ENSGALT00000009231 |          |
| ENSGALT00000016285 |          |
| ENSGALT00000016289 | BAZ1A    |
| ENSGALT00000016327 | SRP54    |
| ENSGALT00000016326 |          |
| ENSGALT00000016334 | PPP2R3C  |
| ENSGALT00000016344 |          |
| ENSGALT00000009439 |          |
| ENSGALT00000016417 |          |
| ENSGALT00000016500 | SEC23A   |
| ENSGALT00000016505 |          |
| ENSGALT00000016512 |          |



|                    |         |
|--------------------|---------|
| ENSGALT00000016576 | COQ6    |
| ENSGALT00000016585 |         |
| ENSGALT00000016604 | ALDH6A1 |
| ENSGALT00000022441 | TOMM40L |
| ENSGALT00000016641 |         |
| ENSGALT00000016690 | LTBP2   |
| ENSGALT00000016704 | AREL1   |
| ENSGALT00000010046 | ANKRD11 |
| ENSGALT00000016756 |         |
| ENSGALT00000016763 | MLH3    |
| ENSGALT00000016792 | NEK9    |
| ENSGALT00000016804 | BATF    |
| ENSGALT00000037707 |         |
| ENSGALT00000016918 | IRF2BPL |
| ENSGALT00000017033 | AHSA1   |
| ENSGALT00000000074 |         |
| ENSGALT00000017069 |         |
| ENSGALT00000004641 |         |
| ENSGALT00000017211 |         |
| ENSGALT00000017221 | SEL1L   |
| ENSGALT00000004911 | BFAR    |
| ENSGALT00000000947 |         |
| ENSGALT00000017348 | TTC8    |
| ENSGALT00000017465 | SMEK1   |
| ENSGALT00000017485 |         |
| ENSGALT00000037601 |         |
| ENSGALT00000005479 |         |
| ENSGALT00000017577 | LGMN    |
| ENSGALT00000005546 | TECPR1  |
| ENSGALT00000001181 | IST1    |
| ENSGALT00000028074 |         |
| ENSGALT00000017630 | BTBD7   |
| ENSGALT00000017687 | ASB2    |
| ENSGALT00000001325 |         |
| ENSGALT00000018063 | ATG2B   |
| ENSGALT00000018066 |         |
| ENSGALT00000005765 | FAM20C  |
| ENSGALT00000005824 | PRKAR1B |
| ENSGALT00000018196 |         |
| ENSGALT00000018280 |         |
| ENSGALT00000018316 | WARS    |
| ENSGALT00000018374 |         |

|                    |          |
|--------------------|----------|
| ENSGALT00000034197 | C7orf50  |
| ENSGALT00000006456 |          |
| ENSGALT00000006473 | MICALL2  |
| ENSGALT00000018521 | HSP90AA1 |
| ENSGALT00000018539 | WDR20    |
| ENSGALT00000018544 | ZNF839   |
| ENSGALT00000018551 |          |
| ENSGALT00000006646 | GAA      |
| ENSGALT00000006656 |          |
| ENSGALT00000032501 |          |
| ENSGALT00000006743 |          |
| ENSGALT00000018666 | TNFAIP2  |
| ENSGALT00000018759 | MARK3    |
| ENSGALT00000006863 | TTYH3    |
| ENSGALT00000018795 | APOPT1   |
| ENSGALT00000037448 |          |
| ENSGALT00000037443 |          |
| ENSGALT00000019138 | BTBD6    |
| ENSGALT00000007098 | FOXK1    |
| ENSGALT00000019340 |          |
| ENSGALT00000019364 |          |
| ENSGALT00000007215 | MMD2     |
| ENSGALT00000007252 |          |
| ENSGALT00000008219 | SWT1     |
| ENSGALT00000019443 | PPM1A    |
| ENSGALT00000034001 |          |
| ENSGALT00000037347 |          |
| ENSGALT00000007417 | SMURF1   |
| ENSGALT00000000238 |          |
| ENSGALT00000019655 |          |
| ENSGALT00000000139 |          |
| ENSGALT00000019761 | NAA30    |
| ENSGALT00000019771 |          |
| ENSGALT00000019806 | PELI2    |
| ENSGALT00000007493 | BUD31    |
| ENSGALT00000019886 |          |
| ENSGALT00000019926 | SAMD4A   |
| ENSGALT00000019930 | CGRRF1   |
| ENSGALT00000007505 |          |
| ENSGALT00000019945 |          |
| ENSGALT00000007510 |          |
| ENSGALT00000007592 | DHRS7B   |

|                    |        |
|--------------------|--------|
| ENSGALT00000020050 | SOS2   |
| ENSGALT00000020133 | MAP4K5 |
| ENSGALT00000007690 |        |
| ENSGALT00000007721 |        |
| ENSGALT00000007745 |        |
| ENSGALT00000020162 | ATL1   |
| ENSGALT00000007838 |        |
| ENSGALT00000020164 | SAV1   |
| ENSGALT00000007980 | ALKBH5 |
| ENSGALT00000020241 | NID2   |
| ENSGALT00000008014 | MIEF2  |
| ENSGALT00000008093 | SHMT1  |
| ENSGALT00000000149 |        |
| ENSGALT00000008119 |        |
| ENSGALT00000019575 |        |
| ENSGALT00000031517 |        |
| ENSGALT00000003794 |        |
| ENSGALT00000008468 | LMF1   |
| ENSGALT00000040739 | LAS1L  |
| ENSGALT00000008614 |        |
| ENSGALT00000008671 |        |
| ENSGALT00000007313 |        |
| ENSGALT00000007294 | YIPF6  |
| ENSGALT00000008816 |        |
| ENSGALT00000007137 | EDA    |
| ENSGALT00000008954 | GFER   |
| ENSGALT00000009002 |        |
| ENSGALT00000006532 |        |
| ENSGALT00000006500 |        |
| ENSGALT00000006376 |        |
| ENSGALT00000022940 |        |
| ENSGALT00000023322 |        |
| ENSGALT00000006314 | ZDHHC9 |
| ENSGALT00000009467 |        |
| ENSGALT00000009734 |        |
| ENSGALT00000009868 |        |
| ENSGALT00000007708 | HDAC8  |
| ENSGALT00000007851 |        |
| ENSGALT00000000161 |        |
| ENSGALT00000010366 | KCTD5  |
| ENSGALT00000007959 | TIMM8A |
| ENSGALT00000010394 |        |

|                    |          |
|--------------------|----------|
| ENSGALT00000010426 |          |
| ENSGALT00000010464 | KIAA0430 |
| ENSGALT00000010556 |          |
| ENSGALT00000008098 |          |
| ENSGALT00000008105 |          |
| ENSGALT00000010888 |          |
| ENSGALT00000008128 |          |
| ENSGALT00000010969 |          |
| ENSGALT00000011038 | SMG1     |
| ENSGALT00000011107 |          |
| ENSGALT00000011312 | EEF2K    |
| ENSGALT00000011412 |          |
| ENSGALT00000009079 | FOXO4    |
| ENSGALT00000011481 |          |
| ENSGALT00000011534 |          |
| ENSGALT00000009239 |          |
| ENSGALT00000039834 | C16orf72 |
| ENSGALT00000000404 |          |
| ENSGALT00000009488 |          |
| ENSGALT00000009540 |          |
| ENSGALT00000012315 | MGRN1    |
| ENSGALT00000012323 | UBALD1   |
| ENSGALT00000012346 |          |
| ENSGALT00000012358 | HMOX2    |
| ENSGALT00000009812 | GPC4     |
| ENSGALT00000012459 |          |
| ENSGALT00000009861 | FAM122B  |
| ENSGALT00000009895 | MOSPD1   |
| ENSGALT00000022056 | MCOLN1   |
| ENSGALT00000012620 |          |
| ENSGALT00000012623 |          |
| ENSGALT00000009988 | FHL1     |
| ENSGALT00000010348 | HTATSF1  |
| ENSGALT00000012696 | DNAJA3   |
| ENSGALT00000021945 |          |
| ENSGALT00000010117 | KIRREL   |
| ENSGALT00000000945 | ETV3     |
| ENSGALT00000010487 |          |
| ENSGALT00000021621 | PRCC     |
| ENSGALT00000004228 | DECR2    |
| ENSGALT00000023483 |          |
| ENSGALT00000001529 |          |

|                    |          |
|--------------------|----------|
| ENSGALT0000003862  |          |
| ENSGALT00000040760 |          |
| ENSGALT0000003641  |          |
| ENSGALT00000011011 |          |
| ENSGALT0000003054  | ABCA3    |
| ENSGALT00000011184 |          |
| ENSGALT00000022043 | TPM3     |
| ENSGALT00000011226 |          |
| ENSGALT00000011305 |          |
| ENSGALT00000015109 | RNPS1    |
| ENSGALT00000015018 |          |
| ENSGALT00000015002 |          |
| ENSGALT00000032362 |          |
| ENSGALT00000023620 |          |
| ENSGALT00000017111 |          |
| ENSGALT00000001109 |          |
| ENSGALT00000003152 | GPRC5B   |
| ENSGALT00000019489 |          |
| ENSGALT00000032336 | NSDHL    |
| ENSGALT00000012141 |          |
| ENSGALT00000012247 |          |
| ENSGALT00000012279 |          |
| ENSGALT00000012370 |          |
| ENSGALT00000012409 |          |
| ENSGALT00000012454 |          |
| ENSGALT00000039451 |          |
| ENSGALT00000012569 |          |
| ENSGALT00000012638 |          |
| ENSGALT00000012629 | ABCB7    |
| ENSGALT00000012759 |          |
| ENSGALT00000012893 |          |
| ENSGALT00000013077 | PAK3     |
| ENSGALT00000013221 | COL4A5   |
| ENSGALT00000013217 | COL4A5   |
| ENSGALT00000013447 | COL4A6   |
| ENSGALT00000013485 |          |
| ENSGALT00000013668 | VBP1     |
| ENSGALT00000013866 |          |
| ENSGALT00000013871 |          |
| ENSGALT00000013962 |          |
| ENSGALT00000014012 | TMEM255A |
| ENSGALT00000014085 |          |

|                    |          |
|--------------------|----------|
| ENSGALT00000014088 |          |
| ENSGALT00000039050 |          |
| ENSGALT00000014414 | FAM199X  |
| ENSGALT00000014716 | TBC1D8B  |
| ENSGALT00000014753 |          |
| ENSGALT00000014767 | CD99L2   |
| ENSGALT00000014782 | MTMR1    |
| ENSGALT00000014807 | MTM1     |
| ENSGALT00000009805 |          |
| ENSGALT00000029631 | ATF1     |
| ENSGALT00000009909 | DIP2B    |
| ENSGALT00000014951 | FMR1     |
| ENSGALT00000015038 |          |
| ENSGALT00000015067 | PLRG1    |
| ENSGALT00000015084 |          |
| ENSGALT00000032288 | MAP9     |
| ENSGALT00000015246 | GUCY1B3  |
| ENSGALT00000028268 | GPD1     |
| ENSGALT00000015275 |          |
| ENSGALT00000015333 | FAM198B  |
| ENSGALT00000015372 |          |
| ENSGALT00000015382 | PPID     |
| ENSGALT00000015418 | FNIP2    |
| ENSGALT00000009619 |          |
| ENSGALT00000015511 | TMEM192  |
| ENSGALT00000015566 |          |
| ENSGALT00000015714 | PALLD    |
| ENSGALT00000015738 | C4orf27  |
| ENSGALT00000019115 | ARHGAP35 |
| ENSGALT00000015813 | CBR4     |
| ENSGALT00000015841 | PCDH18   |
| ENSGALT00000015887 |          |
| ENSGALT00000015926 |          |
| ENSGALT00000016039 | RNF150   |
| ENSGALT00000016070 | USP38    |
| ENSGALT00000016217 |          |
| ENSGALT00000016226 | LSM6     |
| ENSGALT00000038572 |          |
| ENSGALT00000016263 |          |
| ENSGALT00000016278 | PRMT10   |
| ENSGALT00000016293 | ARHGAP10 |
| ENSGALT00000016385 | SH3D19   |

|                    |          |
|--------------------|----------|
| ENSGALT00000016422 | PET112   |
| ENSGALT00000016433 |          |
| ENSGALT00000016475 |          |
| ENSGALT00000016483 | HGSNAT   |
| ENSGALT00000016490 |          |
| ENSGALT00000016555 |          |
| ENSGALT00000016708 |          |
| ENSGALT00000016727 |          |
| ENSGALT00000016846 | CCNG2    |
| ENSGALT00000016908 |          |
| ENSGALT00000017134 | ETNPPL   |
| ENSGALT00000017138 |          |
| ENSGALT00000025976 |          |
| ENSGALT00000017158 | PAPSS1   |
| ENSGALT00000017210 | INTS12   |
| ENSGALT00000017222 | PPA2     |
| ENSGALT00000017251 |          |
| ENSGALT00000017263 | SNX25    |
| ENSGALT00000017270 |          |
| ENSGALT00000017294 |          |
| ENSGALT00000017342 | RWDD4    |
| ENSGALT00000017346 | CDKN2AIP |
| ENSGALT00000017488 | SAP30    |
| ENSGALT00000017505 |          |
| ENSGALT00000017617 | ASB5     |
| ENSGALT00000017629 | VEGFC    |
| ENSGALT00000017688 | G3BP2    |
| ENSGALT00000017693 | BMP2K    |
| ENSGALT00000017703 | ANTXR2   |
| ENSGALT00000017784 | NUDT9    |
| ENSGALT00000018144 |          |
| ENSGALT00000018225 | ENOPH1   |
| ENSGALT00000021658 | ARHGEF11 |
| ENSGALT00000029722 | RNF41    |
| ENSGALT00000018298 |          |
| ENSGALT00000022282 |          |
| ENSGALT00000018500 | TECRL    |
| ENSGALT00000032173 | NOA1     |
| ENSGALT00000001580 |          |
| ENSGALT00000018588 |          |
| ENSGALT00000041395 | LEPROTL1 |
| ENSGALT00000018652 |          |

|                    |          |
|--------------------|----------|
| ENSGALT00000001556 | MTMR4    |
| ENSGALT00000002265 | NDRG3    |
| ENSGALT00000018681 | CCNI     |
| ENSGALT00000002335 |          |
| ENSGALT00000018738 | SCARB2   |
| ENSGALT00000002384 |          |
| ENSGALT00000001603 | ELN      |
| ENSGALT00000021722 |          |
| ENSGALT00000018860 | RUFY3    |
| ENSGALT00000018869 | GRSF1    |
| ENSGALT00000001731 | AUTS2    |
| ENSGALT00000002775 |          |
| ENSGALT00000002799 |          |
| ENSGALT00000003157 | AHCY     |
| ENSGALT00000001926 | GTF2IRD1 |
| ENSGALT00000019202 | UBA6     |
| ENSGALT00000002942 | MAP1LC3A |
| ENSGALT00000002964 | DYNLRB1  |
| ENSGALT00000040421 | RALY     |
| ENSGALT00000004812 | PXMP4    |
| ENSGALT00000019309 |          |
| ENSGALT00000019311 | NUDT6    |
| ENSGALT00000040447 |          |
| ENSGALT00000002223 | ANKFY1   |
| ENSGALT00000002242 | CYB5D2   |
| ENSGALT00000019519 |          |
| ENSGALT00000002517 | DERL2    |
| ENSGALT00000002525 | C1QBP    |
| ENSGALT00000019642 |          |
| ENSGALT00000019661 |          |
| ENSGALT00000035106 | RABL5    |
| ENSGALT00000006265 |          |
| ENSGALT00000019851 |          |
| ENSGALT00000006537 | TOMM34   |
| ENSGALT00000019895 | PLA2G12A |
| ENSGALT00000019897 |          |
| ENSGALT00000037662 |          |
| ENSGALT00000019968 | TSPAN5   |
| ENSGALT00000006588 |          |
| ENSGALT00000006631 |          |
| ENSGALT00000006710 |          |
| ENSGALT00000019988 |          |



|                    |          |
|--------------------|----------|
| ENSGALT00000006749 |          |
| ENSGALT00000002944 | DTX2     |
| ENSGALT00000040248 |          |
| ENSGALT00000003016 | MDH2     |
| ENSGALT00000007309 | SULF2    |
| ENSGALT00000007499 | CSE1L    |
| ENSGALT00000003069 | TMEM120A |
| ENSGALT00000020032 | TRMT10A  |
| ENSGALT00000034233 | KCNB1    |
| ENSGALT00000000070 |          |
| ENSGALT00000003192 |          |
| ENSGALT00000028340 |          |
| ENSGALT00000020064 | EMCN     |
| ENSGALT00000007724 | CCNDBP1  |
| ENSGALT00000020119 |          |
| ENSGALT00000008180 |          |
| ENSGALT00000020161 | BDH2     |
| ENSGALT00000008232 | LSM14B   |
| ENSGALT00000008294 | MTG2     |
| ENSGALT00000008344 |          |
| ENSGALT00000041383 |          |
| ENSGALT00000023517 |          |
| ENSGALT00000003748 |          |
| ENSGALT00000009067 |          |
| ENSGALT00000022137 |          |
| ENSGALT00000003757 |          |
| ENSGALT00000009144 |          |
| ENSGALT00000003775 |          |
| ENSGALT00000003859 |          |
| ENSGALT00000022171 |          |
| ENSGALT00000009286 |          |
| ENSGALT00000009312 |          |
| ENSGALT00000022194 | VPS37A   |
| ENSGALT00000022198 |          |
| ENSGALT00000009385 |          |
| ENSGALT00000033928 |          |
| ENSGALT00000009494 | PCMTD2   |
| ENSGALT00000022308 |          |
| ENSGALT00000022312 |          |
| ENSGALT00000003944 |          |
| ENSGALT00000004011 |          |
| ENSGALT00000004087 | TPST1    |

|                    |          |
|--------------------|----------|
| ENSGALT00000004122 |          |
| ENSGALT00000009779 | ZBTB46   |
| ENSGALT00000004144 | TMEM248  |
| ENSGALT00000036310 |          |
| ENSGALT00000032094 | SRD5A3   |
| ENSGALT00000004146 | FAM211A  |
| ENSGALT00000004183 |          |
| ENSGALT00000022578 | CHIC2    |
| ENSGALT00000004394 | PITPNA   |
| ENSGALT00000022602 | SCFD2    |
| ENSGALT00000032088 | USP46    |
| ENSGALT00000022640 |          |
| ENSGALT00000022792 | DCUN1D4  |
| ENSGALT00000009996 | SLC52A3  |
| ENSGALT00000009999 |          |
| ENSGALT00000022799 | OCIAD1   |
| ENSGALT00000010129 |          |
| ENSGALT00000004762 |          |
| ENSGALT00000010607 | TM9SF4   |
| ENSGALT00000022997 |          |
| ENSGALT00000004849 |          |
| ENSGALT00000023042 | SLC30A9  |
| ENSGALT00000023043 | TMEM33   |
| ENSGALT00000005087 | POLDIP2  |
| ENSGALT00000023102 |          |
| ENSGALT00000023136 | LIAS     |
| ENSGALT00000010897 | CDK5RAP1 |
| ENSGALT00000029529 | KLHL5    |
| ENSGALT00000039224 |          |
| ENSGALT00000010979 |          |
| ENSGALT00000003560 |          |
| ENSGALT00000003630 |          |
| ENSGALT00000003701 |          |
| ENSGALT00000003720 |          |
| ENSGALT00000021744 | PCBP2    |
| ENSGALT00000003781 |          |
| ENSGALT00000003954 | COL5A2   |
| ENSGALT00000023206 | RBPJ     |
| ENSGALT00000023214 | SEL1L3   |
| ENSGALT00000004032 |          |
| ENSGALT00000004147 |          |
| ENSGALT00000006318 | RPL23A   |

|                    |         |
|--------------------|---------|
| ENSGALT00000004253 | DUSP19  |
| ENSGALT00000004344 | NCKAP1  |
| ENSGALT00000011732 |         |
| ENSGALT00000012067 | CTSZ    |
| ENSGALT00000023256 | SOD3    |
| ENSGALT00000006365 |         |
| ENSGALT00000023259 |         |
| ENSGALT00000023263 |         |
| ENSGALT00000039685 |         |
| ENSGALT00000012194 |         |
| ENSGALT00000006417 | PHF12   |
| ENSGALT00000004363 |         |
| ENSGALT00000041120 | FSTL3   |
| ENSGALT00000004522 | KANSL1L |
| ENSGALT00000004557 |         |
| ENSGALT00000012397 |         |
| ENSGALT00000012648 | ZNF217  |
| ENSGALT00000023420 |         |
| ENSGALT00000023428 | C1QTNF7 |
| ENSGALT00000028050 | DPM1    |
| ENSGALT00000024191 | LYAR    |
| ENSGALT00000038844 |         |
| ENSGALT00000013022 |         |
| ENSGALT00000006434 | NUFIP2  |
| ENSGALT00000024208 |         |
| ENSGALT00000005664 |         |
| ENSGALT00000004660 | TXNL1   |
| ENSGALT00000006045 |         |
| ENSGALT00000025037 | WFS1    |
| ENSGALT00000006652 | NSRP1   |
| ENSGALT00000039716 |         |
| ENSGALT00000025045 | MAN2B2  |
| ENSGALT00000006250 |         |
| ENSGALT00000006838 | CPD     |
| ENSGALT00000004384 |         |
| ENSGALT00000025066 |         |
| ENSGALT00000006274 |         |
| ENSGALT00000006341 | IQCA1   |
| ENSGALT00000025088 | ABLIM2  |
| ENSGALT00000025114 | HTRA3   |
| ENSGALT00000025139 | ACOX3   |
| ENSGALT00000025174 | DOK7    |

|                    |          |
|--------------------|----------|
| ENSGALT0000006583  | SH3BP4   |
| ENSGALT0000006741  | TRAF3IP1 |
| ENSGALT0000007018  | SPECC1   |
| ENSGALT00000033730 |          |
| ENSGALT0000003868  | AQP3     |
| ENSGALT0000002555  |          |
| ENSGALT00000025262 |          |
| ENSGALT0000002382  | NT5DC2   |
| ENSGALT0000009315  |          |
| ENSGALT00000039669 |          |
| ENSGALT0000009887  |          |
| ENSGALT0000002508  |          |
| ENSGALT0000009335  |          |
| ENSGALT00000025335 |          |
| ENSGALT00000025338 |          |
| ENSGALT00000034480 |          |
| ENSGALT0000007195  | TRPV2    |
| ENSGALT0000007345  |          |
| ENSGALT0000007351  | TAX1BP3  |
| ENSGALT0000007373  | CTNS     |
| ENSGALT0000002971  | DNAJB5   |
| ENSGALT0000007457  | AKAP10   |
| ENSGALT00000025439 | PTCD3    |
| ENSGALT00000025450 |          |
| ENSGALT0000003330  | NPRL2    |
| ENSGALT0000003543  |          |
| ENSGALT0000003585  | MAPKAPK3 |
| ENSGALT00000025484 |          |
| ENSGALT0000007525  | ULK2     |
| ENSGALT0000003737  |          |
| ENSGALT00000012579 | TMEFF2   |
| ENSGALT00000025489 |          |
| ENSGALT00000012866 |          |
| ENSGALT0000007598  |          |
| ENSGALT0000007650  | NXN      |
| ENSGALT00000013057 | COQ10B   |
| ENSGALT00000013137 |          |
| ENSGALT00000023128 |          |
| ENSGALT00000013192 |          |
| ENSGALT00000035848 |          |
| ENSGALT00000025715 | EIF2AK3  |
| ENSGALT00000013202 |          |

|                    |         |
|--------------------|---------|
| ENSGALT00000032015 |         |
| ENSGALT00000003917 | RNF123  |
| ENSGALT00000033513 | C2orf47 |
| ENSGALT00000007833 | FAM101B |
| ENSGALT00000025773 |         |
| ENSGALT00000020313 |         |
| ENSGALT00000033496 |         |
| ENSGALT00000003976 | CREB3   |
| ENSGALT00000013327 |         |
| ENSGALT00000004064 |         |
| ENSGALT00000008181 | GDPD1   |
| ENSGALT00000013409 |         |
| ENSGALT00000013633 | TRAK2   |
| ENSGALT00000013642 | STRADB  |
| ENSGALT00000013654 | TMEM237 |
| ENSGALT00000008250 |         |
| ENSGALT00000013679 | MPP4    |
| ENSGALT00000025829 | ATRN    |
| ENSGALT00000034226 |         |
| ENSGALT00000006075 | TEX264  |
| ENSGALT00000013707 | ALS2    |
| ENSGALT00000008348 |         |
| ENSGALT00000036280 |         |
| ENSGALT00000008405 | MED13   |
| ENSGALT00000008456 |         |
| ENSGALT00000001250 | TMEM173 |
| ENSGALT00000013828 | CCNYL1  |
| ENSGALT00000005943 | OSMR    |
| ENSGALT00000029609 |         |
| ENSGALT00000004187 |         |
| ENSGALT00000023947 | C7      |
| ENSGALT00000008605 | CA4     |
| ENSGALT00000023976 |         |
| ENSGALT00000023983 | C5orf28 |
| ENSGALT00000000046 |         |
| ENSGALT00000007519 | ASPN    |
| ENSGALT00000023990 | NNT     |
| ENSGALT00000007684 | IARS    |
| ENSGALT00000003921 |         |
| ENSGALT00000024048 | ARL15   |
| ENSGALT00000014015 |         |
| ENSGALT00000023719 |         |

|                    |          |
|--------------------|----------|
| ENSGALT0000000221  | CDS2     |
| ENSGALT00000003725 |          |
| ENSGALT00000003545 | ETF1     |
| ENSGALT00000014120 | RAPH1    |
| ENSGALT00000023728 |          |
| ENSGALT00000007969 | TIMP4    |
| ENSGALT00000007976 |          |
| ENSGALT00000003489 |          |
| ENSGALT00000014220 |          |
| ENSGALT00000014333 | IDH1     |
| ENSGALT00000014370 | PIKFYVE  |
| ENSGALT00000008859 | DYNLL2   |
| ENSGALT00000002683 | MAT2B    |
| ENSGALT00000002649 | NUDCD2   |
| ENSGALT00000002636 | CCNG1    |
| ENSGALT00000023799 | PPWD1    |
| ENSGALT00000008944 | AKAP1    |
| ENSGALT00000008222 | FBLN2    |
| ENSGALT00000023839 | SREK1    |
| ENSGALT00000002157 | ADRA1B   |
| ENSGALT00000008313 | FAM120A  |
| ENSGALT00000008368 | WNK2     |
| ENSGALT00000001972 | CLIP2    |
| ENSGALT00000023888 | SERINC5  |
| ENSGALT00000033324 |          |
| ENSGALT00000023918 | HOMER1   |
| ENSGALT00000007194 |          |
| ENSGALT00000007047 |          |
| ENSGALT00000008433 | BICD2    |
| ENSGALT00000006998 | AP3B1    |
| ENSGALT00000014791 |          |
| ENSGALT00000038562 | F2RL2    |
| ENSGALT00000024118 | COL4A3BP |
| ENSGALT00000022788 | CPEB4    |
| ENSGALT00000024097 | GFM2     |
| ENSGALT00000024086 | HEXB     |
| ENSGALT00000008882 | ASB14    |
| ENSGALT00000029777 |          |
| ENSGALT00000009143 | NLK      |
| ENSGALT00000009146 | TMEM97   |
| ENSGALT00000024194 | MRPS27   |
| ENSGALT00000001663 | GTSF1    |

|                    |          |
|--------------------|----------|
| ENSGALT00000024183 | PGM5     |
| ENSGALT00000023329 | AK3      |
| ENSGALT00000009021 | ARF4     |
| ENSGALT00000000557 |          |
| ENSGALT00000024230 | RCL1     |
| ENSGALT00000024242 | CD274    |
| ENSGALT00000024250 | KIAA1432 |
| ENSGALT00000009368 |          |
| ENSGALT00000024268 | KIAA2026 |
| ENSGALT00000032836 | KDM4C    |
| ENSGALT00000002766 |          |
| ENSGALT00000015032 | AGPS     |
| ENSGALT00000033290 |          |
| ENSGALT00000002628 |          |
| ENSGALT00000015075 | MTX2     |
| ENSGALT00000009300 | UQCRC1   |
| ENSGALT00000009663 | MED31    |
| ENSGALT00000015103 | KIAA1715 |
| ENSGALT00000000004 |          |
| ENSGALT00000015106 |          |
| ENSGALT00000038862 | FBXO39   |
| ENSGALT00000038228 | FXN      |
| ENSGALT00000009792 | SMTNL2   |
| ENSGALT00000002495 | DUSP26   |
| ENSGALT00000024387 | MAMDC2   |
| ENSGALT00000000469 | PSMC5    |
| ENSGALT00000024435 |          |
| ENSGALT00000015187 |          |
| ENSGALT00000015215 |          |
| ENSGALT00000021613 |          |
| ENSGALT00000000694 |          |
| ENSGALT00000032821 |          |
| ENSGALT00000015508 |          |
| ENSGALT00000032816 | NMRK1    |
| ENSGALT00000015535 | SLC25A12 |
| ENSGALT00000000541 |          |
| ENSGALT00000004898 | PROSC    |
| ENSGALT00000009495 | RAB7A    |
| ENSGALT00000009501 | RPN1     |
| ENSGALT00000000891 | DNAJC11  |
| ENSGALT00000020544 | FRMD3    |
| ENSGALT00000020546 | IDNK     |

|                    |          |
|--------------------|----------|
| ENSGALT00000030746 |          |
| ENSGALT00000009510 | EEFSEC   |
| ENSGALT00000009542 |          |
| ENSGALT00000020549 |          |
| ENSGALT00000005307 | NOP16    |
| ENSGALT00000009591 | SEC61A1  |
| ENSGALT00000000901 | KLHL21   |
| ENSGALT00000005328 |          |
| ENSGALT00000009651 |          |
| ENSGALT00000005077 | EIF4EBP1 |
| ENSGALT00000040847 |          |
| ENSGALT00000009723 |          |
| ENSGALT00000015660 | UBR3     |
| ENSGALT00000020563 |          |
| ENSGALT00000009765 |          |
| ENSGALT00000005847 | RNF145   |
| ENSGALT00000029074 |          |
| ENSGALT00000009993 |          |
| ENSGALT00000005867 |          |
| ENSGALT00000010098 | KLF15    |
| ENSGALT00000010142 |          |
| ENSGALT00000015749 | METTL5   |
| ENSGALT00000020572 |          |
| ENSGALT00000023340 | CHD5     |
| ENSGALT00000015751 |          |
| ENSGALT00000020582 |          |
| ENSGALT00000015791 | KLHL23   |
| ENSGALT00000010231 |          |
| ENSGALT00000000783 | CCDC47   |
| ENSGALT00000010255 |          |
| ENSGALT00000015996 | PPIG     |
| ENSGALT00000020588 |          |
| ENSGALT00000020591 |          |
| ENSGALT00000001513 | TPRG1L   |
| ENSGALT00000016007 |          |
| ENSGALT00000006159 | MED7     |
| ENSGALT00000006244 | MRPL22   |
| ENSGALT00000006374 | LARP1    |
| ENSGALT00000010371 |          |
| ENSGALT00000010440 | CCDC51   |
| ENSGALT00000006432 |          |
| ENSGALT00000000842 | KANSL1   |



|                    |          |
|--------------------|----------|
| ENSGALT00000040399 | SLC25A39 |
| ENSGALT00000022180 | LRR2     |
| ENSGALT00000006615 |          |
| ENSGALT00000035387 |          |
| ENSGALT0000001855  |          |
| ENSGALT00000021979 | SPTLC1   |
| ENSGALT00000006945 | CCDC69   |
| ENSGALT00000000584 |          |
| ENSGALT00000035182 |          |
| ENSGALT00000007522 |          |
| ENSGALT00000037896 |          |
| ENSGALT00000010572 | SRPK3    |
| ENSGALT0000001986  | TMEM52   |
| ENSGALT00000010655 | MTMR14   |
| ENSGALT00000001955 | ZNF652   |
| ENSGALT00000001957 |          |
| ENSGALT00000001966 | ABI3     |
| ENSGALT00000035169 |          |
| ENSGALT00000001975 |          |
| ENSGALT00000017724 |          |
| ENSGALT00000000332 |          |
| ENSGALT00000000365 | FBXL17   |
| ENSGALT00000024619 | PAM      |
| ENSGALT00000002003 | UBE2Z    |
| ENSGALT00000007219 | DCTN4    |
| ENSGALT00000002317 | CALCOCO2 |
| ENSGALT00000001947 | HOXB9    |
| ENSGALT00000005499 |          |
| ENSGALT00000005511 |          |
| ENSGALT00000000373 |          |
| ENSGALT00000007249 |          |
| ENSGALT00000028252 |          |
| ENSGALT00000007290 | NDST1    |
| ENSGALT00000005561 | AGPAT6   |
| ENSGALT00000009192 | PDGFRB   |
| ENSGALT00000009190 | CSF1R    |
| ENSGALT00000005683 |          |
| ENSGALT00000024737 |          |
| ENSGALT00000036239 |          |
| ENSGALT00000024799 |          |
| ENSGALT00000002321 | VWA1     |
| ENSGALT00000002423 | PSMB3    |

|                    |         |
|--------------------|---------|
| ENSGALT00000018083 |         |
| ENSGALT00000002452 | PIP4K2B |
| ENSGALT00000011121 | QRICH1  |
| ENSGALT00000009349 | RNF130  |
| ENSGALT00000005799 | AP3M2   |
| ENSGALT00000036016 |         |
| ENSGALT00000009410 | TBC1D9B |
| ENSGALT00000011269 |         |
| ENSGALT00000005886 | PLAT    |
| ENSGALT00000011358 | PRKAR2A |
| ENSGALT00000024832 |         |
| ENSGALT00000024838 |         |
| ENSGALT00000037774 |         |
| ENSGALT00000029612 | VDAC3   |
| ENSGALT00000011505 |         |
| ENSGALT00000024902 | SLC44A1 |
| ENSGALT00000002573 | FBXL20  |
| ENSGALT00000002657 | CDK12   |
| ENSGALT00000023556 | STARD3  |
| ENSGALT00000002864 | UBE2J2  |
| ENSGALT00000011518 | KCTD6   |
| ENSGALT00000011555 | ACOX2   |
| ENSGALT00000025051 | RAD23B  |
| ENSGALT00000002907 |         |
| ENSGALT00000023458 | KANSL3  |
| ENSGALT00000000352 |         |
| ENSGALT00000029130 |         |
| ENSGALT00000023663 | ERAP1   |
| ENSGALT00000011799 |         |
| ENSGALT00000023651 |         |
| ENSGALT00000033125 |         |
| ENSGALT00000011817 |         |
| ENSGALT00000023641 | TTC37   |
| ENSGALT00000009699 | CNOT6   |
| ENSGALT00000033111 |         |
| ENSGALT00000018302 | SLC4A3  |
| ENSGALT00000012074 |         |
| ENSGALT00000003902 | GPR157  |
| ENSGALT00000012394 |         |
| ENSGALT00000003951 | SPSB1   |
| ENSGALT00000005478 |         |
| ENSGALT00000005463 |         |

|                    |          |
|--------------------|----------|
| ENSGALT0000004118  |          |
| ENSGALT00000032786 |          |
| ENSGALT00000005294 |          |
| ENSGALT00000010215 |          |
| ENSGALT00000028126 |          |
| ENSGALT00000012448 |          |
| ENSGALT00000022505 | PCYOX1   |
| ENSGALT00000018446 | DES      |
| ENSGALT00000034107 | TXNDC15  |
| ENSGALT00000010356 | SEC24A   |
| ENSGALT00000012660 | GXYLT2   |
| ENSGALT00000004300 | KIF1B    |
| ENSGALT00000033329 | PPP4R2   |
| ENSGALT00000032789 |          |
| ENSGALT00000004426 |          |
| ENSGALT00000004476 | PEX14    |
| ENSGALT00000018477 |          |
| ENSGALT00000029510 |          |
| ENSGALT00000025065 |          |
| ENSGALT00000022896 | NUDCD3   |
| ENSGALT00000010437 |          |
| ENSGALT00000010461 |          |
| ENSGALT00000010508 |          |
| ENSGALT00000010517 |          |
| ENSGALT00000005284 | MTOR     |
| ENSGALT00000005311 |          |
| ENSGALT00000005447 | PLEKHM2  |
| ENSGALT00000025254 | HSDL2    |
| ENSGALT00000025295 | UGCG     |
| ENSGALT00000025297 |          |
| ENSGALT00000025304 | KIAA0368 |
| ENSGALT00000025326 |          |
| ENSGALT00000013532 |          |
| ENSGALT00000013623 |          |
| ENSGALT00000018495 | FAM134A  |
| ENSGALT00000004510 | RUNDC1   |
| ENSGALT00000002747 | PLAA     |
| ENSGALT00000002845 | TEK      |
| ENSGALT00000036208 |          |
| ENSGALT00000004453 | VAT1     |
| ENSGALT00000013700 |          |
| ENSGALT00000013715 |          |

|                    |          |
|--------------------|----------|
| ENSGALT00000037566 |          |
| ENSGALT00000003135 |          |
| ENSGALT00000013770 | IFT122   |
| ENSGALT00000013808 | PLXND1   |
| ENSGALT00000013831 | TMCC1    |
| ENSGALT00000013922 | FGD5     |
| ENSGALT00000003386 |          |
| ENSGALT00000003423 |          |
| ENSGALT00000011833 |          |
| ENSGALT00000011880 |          |
| ENSGALT00000003696 | ATG12    |
| ENSGALT00000011976 |          |
| ENSGALT00000034531 |          |
| ENSGALT00000003983 | MCCC2    |
| ENSGALT00000018650 | TMBIM1   |
| ENSGALT00000018675 |          |
| ENSGALT00000006425 |          |
| ENSGALT00000039619 |          |
| ENSGALT00000038163 |          |
| ENSGALT00000004909 | PINK1    |
| ENSGALT00000018709 | SMARCAL1 |
| ENSGALT00000013288 |          |
| ENSGALT00000013361 | FEM1C    |
| ENSGALT00000018820 |          |
| ENSGALT00000018933 | PTPN4    |
| ENSGALT00000029784 |          |
| ENSGALT00000008572 | PPIC     |
| ENSGALT00000019039 | NIFK     |
| ENSGALT00000019041 |          |
| ENSGALT00000019090 | DIRC2    |
| ENSGALT00000019110 | PDIA5    |
| ENSGALT00000019216 |          |
| ENSGALT00000019286 | HEG1     |
| ENSGALT00000007199 | MFN2     |
| ENSGALT00000007216 |          |
| ENSGALT00000019698 | OSBPL11  |
| ENSGALT00000019704 |          |
| ENSGALT00000019721 |          |
| ENSGALT00000007342 | MTHFR    |
| ENSGALT00000032941 |          |
| ENSGALT00000007609 | C1QB     |
| ENSGALT00000007608 | C1QA     |

|                    |         |
|--------------------|---------|
| ENSGALT00000019870 | SLC35F5 |
| ENSGALT00000034897 |         |
| ENSGALT00000019931 | CCNT2   |
| ENSGALT00000039213 | CLDN19  |
| ENSGALT00000007741 |         |
| ENSGALT00000007793 | PPCS    |
| ENSGALT00000020181 |         |
| ENSGALT00000020351 | MBD5    |
| ENSGALT00000020382 |         |
| ENSGALT00000029274 |         |
| ENSGALT00000020391 |         |
| ENSGALT00000020417 |         |
| ENSGALT00000020434 | ARL5A   |
| ENSGALT00000020486 | GPD2    |
| ENSGALT00000020497 |         |
| ENSGALT00000020547 | MARCH7  |
| ENSGALT00000001983 |         |
| ENSGALT00000001997 |         |
| ENSGALT00000002184 |         |
| ENSGALT00000002361 |         |
| ENSGALT00000003148 | COMT    |
| ENSGALT00000003199 |         |
| ENSGALT00000003339 | PGAM5   |
| ENSGALT00000003414 | CHFR    |
| ENSGALT00000003784 | ULK1    |
| ENSGALT00000003883 | MMP17   |
| ENSGALT00000034743 |         |
| ENSGALT00000004249 | SLC15A4 |
| ENSGALT00000004577 |         |
| ENSGALT00000004598 |         |
| ENSGALT00000004770 | SCARB1  |
| ENSGALT00000004933 | NCOR2   |
| ENSGALT00000005240 |         |
| ENSGALT00000005393 |         |
| ENSGALT00000006066 | ANAPC7  |
| ENSGALT00000026506 | HSF1    |
| ENSGALT00000007010 | MLXIP   |
| ENSGALT00000000380 | HMBS    |
| ENSGALT00000007031 | DIABLO  |
| ENSGALT00000000393 | VPS11   |
| ENSGALT00000000417 | SIK2    |
| ENSGALT00000007244 | PPTC7   |

|                    |          |
|--------------------|----------|
| ENSGALT00000007277 |          |
| ENSGALT00000035085 |          |
| ENSGALT00000001383 | PANX3    |
| ENSGALT00000000486 |          |
| ENSGALT00000000525 | DHDDS    |
| ENSGALT00000001501 |          |
| ENSGALT00000007523 |          |
| ENSGALT00000001579 |          |
| ENSGALT00000000760 | CNKS1    |
| ENSGALT00000000781 | LAPTM5   |
| ENSGALT00000001710 |          |
| ENSGALT00000001717 |          |
| ENSGALT00000001790 | KCNJ5    |
| ENSGALT00000000876 |          |
| ENSGALT00000001897 |          |
| ENSGALT00000000878 |          |
| ENSGALT00000038999 |          |
| ENSGALT00000000957 | CTPS1    |
| ENSGALT00000001016 |          |
| ENSGALT00000002056 |          |
| ENSGALT00000001026 | STX12    |
| ENSGALT00000001032 |          |
| ENSGALT00000023447 | HECTD4   |
| ENSGALT00000001127 |          |
| ENSGALT00000002230 | JAM3     |
| ENSGALT00000002312 | VPS26B   |
| ENSGALT00000002324 |          |
| ENSGALT00000002439 |          |
| ENSGALT00000002903 |          |
| ENSGALT00000001253 | ZMPSTE24 |
| ENSGALT00000003079 | LDB3     |
| ENSGALT00000003144 |          |
| ENSGALT00000003257 |          |
| ENSGALT00000007773 | ISCU     |
| ENSGALT00000001788 |          |
| ENSGALT00000001834 | PPP2R3A  |
| ENSGALT00000001317 |          |
| ENSGALT00000041155 | FAM46B   |
| ENSGALT00000001392 | WDTC1    |
| ENSGALT00000001847 | PCCB     |
| ENSGALT00000010780 | ARHGEF12 |
| ENSGALT00000034383 |          |

|                    |            |
|--------------------|------------|
| ENSGALT00000010901 | PVRL1      |
| ENSGALT00000003908 |            |
| ENSGALT00000040822 |            |
| ENSGALT00000004014 | CSGALNACT2 |
| ENSGALT00000034212 |            |
| ENSGALT00000004154 |            |
| ENSGALT00000041354 |            |
| ENSGALT00000034167 |            |
| ENSGALT00000004265 |            |
| ENSGALT00000001474 | MTFR1L     |
| ENSGALT00000040809 |            |
| ENSGALT00000001481 |            |
| ENSGALT00000011217 |            |
| ENSGALT00000001539 | MAN1C1     |
| ENSGALT00000004359 |            |
| ENSGALT00000011363 |            |
| ENSGALT00000001870 |            |
| ENSGALT00000023514 | CADM1      |
| ENSGALT00000001916 | CLIC4      |
| ENSGALT00000001994 | TRNAU1AP   |
| ENSGALT00000004680 |            |
| ENSGALT00000011570 |            |
| ENSGALT00000004876 |            |
| ENSGALT00000002149 | SRSF4      |
| ENSGALT00000005033 |            |
| ENSGALT00000034008 |            |
| ENSGALT00000011831 | CEP164     |
| ENSGALT00000008853 | ADRBK2     |
| ENSGALT00000002306 | FHL3       |
| ENSGALT00000003103 | LIMS2      |
| ENSGALT00000003200 |            |
| ENSGALT00000011985 | SCN4B      |
| ENSGALT00000034294 | SCN2B      |
| ENSGALT00000003399 |            |
| ENSGALT00000011998 |            |
| ENSGALT00000000544 |            |
| ENSGALT00000010877 |            |
| ENSGALT00000012507 | SLC37A4    |
| ENSGALT00000005757 | PTEN       |
| ENSGALT00000005787 | ATAD1      |
| ENSGALT00000006268 |            |
| ENSGALT00000009327 | KREMEN1    |

|                    |          |
|--------------------|----------|
| ENSGALT0000006467  | SLC25A16 |
| ENSGALT0000006533  | CCAR1    |
| ENSGALT0000009461  | DGCR14   |
| ENSGALT0000009474  | DGCR2    |
| ENSGALT0000006608  |          |
| ENSGALT00000036018 | EVA1B    |
| ENSGALT00000010597 | DNAJB11  |
| ENSGALT0000006635  | VPS26A   |
| ENSGALT00000012830 | DLAT     |
| ENSGALT00000003587 |          |
| ENSGALT00000012907 |          |
| ENSGALT00000040712 |          |
| ENSGALT00000001980 |          |
| ENSGALT00000009622 |          |
| ENSGALT0000006946  | MCU      |
| ENSGALT0000007067  | PPA1     |
| ENSGALT00000010418 |          |
| ENSGALT00000010254 |          |
| ENSGALT00000010325 | WDR53    |
| ENSGALT00000010258 | D2HGDH   |
| ENSGALT00000007605 |          |
| ENSGALT00000007678 |          |
| ENSGALT00000007743 | ZMIZ1    |
| ENSGALT00000010319 | CRKL     |
| ENSGALT00000010150 | THAP4    |
| ENSGALT00000010118 | KLHL30   |
| ENSGALT00000005168 | PTP4A2   |
| ENSGALT00000010647 |          |
| ENSGALT00000010666 | GUCD1    |
| ENSGALT00000005249 |          |
| ENSGALT00000005281 |          |
| ENSGALT00000008009 | COMTD1   |
| ENSGALT00000008018 |          |
| ENSGALT00000008036 |          |
| ENSGALT00000008109 |          |
| ENSGALT00000008126 |          |
| ENSGALT00000021437 |          |
| ENSGALT00000008159 | CAMK2G   |
| ENSGALT00000009365 |          |
| ENSGALT00000009355 |          |
| ENSGALT00000008188 |          |
| ENSGALT00000005575 |          |



|                    |          |
|--------------------|----------|
| ENSGALT00000008280 |          |
| ENSGALT00000035005 |          |
| ENSGALT00000008299 |          |
| ENSGALT00000005662 | RNF19B   |
| ENSGALT00000010902 |          |
| ENSGALT00000005857 |          |
| ENSGALT00000008397 | MYOZ1    |
| ENSGALT00000008603 | SORBS1   |
| ENSGALT00000008903 |          |
| ENSGALT00000006028 | PABPC4   |
| ENSGALT00000008618 | MRPS22   |
| ENSGALT00000008877 | TM9SF3   |
| ENSGALT00000011250 | PIK3IP1  |
| ENSGALT00000008940 | NOLC1    |
| ENSGALT00000009008 | PITX3    |
| ENSGALT00000009044 | GBF1     |
| ENSGALT00000011276 |          |
| ENSGALT00000011283 | C12orf43 |
| ENSGALT00000009122 | CUEDC2   |
| ENSGALT00000006228 | CAP1     |
| ENSGALT00000003064 | PRPF38B  |
| ENSGALT00000009141 | HIF1AN   |
| ENSGALT00000003258 | GPSM2    |
| ENSGALT00000011502 | MLEC     |
| ENSGALT00000008412 |          |
| ENSGALT00000008360 | ACSL3    |
| ENSGALT00000003286 | CLCC1    |
| ENSGALT00000011568 | RNF10    |
| ENSGALT00000003326 | WDR47    |
| ENSGALT00000006375 |          |
| ENSGALT00000008282 |          |
| ENSGALT00000011588 |          |
| ENSGALT00000008246 |          |
| ENSGALT00000008191 | CUL3     |
| ENSGALT00000006539 | FUCA1    |
| ENSGALT00000008057 | DOCK10   |
| ENSGALT00000003625 | ZBTB41   |
| ENSGALT00000011731 |          |
| ENSGALT00000009862 | MAPK8    |
| ENSGALT00000003831 |          |
| ENSGALT00000003897 |          |
| ENSGALT00000004005 |          |

|                    |         |
|--------------------|---------|
| ENSGALT00000004201 | OLFML2B |
| ENSGALT00000004312 | UHMK1   |
| ENSGALT00000010304 | LIPA    |
| ENSGALT00000004870 | MFF     |
| ENSGALT00000011828 |         |
| ENSGALT00000004824 | AGFG1   |
| ENSGALT00000010382 | PANK1   |
| ENSGALT00000004623 | TRIP12  |
| ENSGALT00000033697 |         |
| ENSGALT00000011938 | HSPB8   |
| ENSGALT00000010542 | NOC3L   |
| ENSGALT00000004729 | PHGDH   |
| ENSGALT00000011975 |         |
| ENSGALT00000033985 |         |
| ENSGALT00000004307 |         |
| ENSGALT00000004266 | XRN1    |
| ENSGALT00000010939 |         |
| ENSGALT00000011152 |         |
| ENSGALT00000011201 | CPEB3   |
| ENSGALT00000011235 | BTAF1   |
| ENSGALT00000004131 | PCOLCE2 |
| ENSGALT00000003699 | C3orf58 |
| ENSGALT00000012100 |         |
| ENSGALT00000005458 |         |
| ENSGALT00000012892 | PNPT1   |
| ENSGALT00000012835 | EFEMP1  |
| ENSGALT00000011008 |         |
| ENSGALT00000005530 | ALDH9A1 |
| ENSGALT00000012531 | PRODH   |
| ENSGALT00000012708 |         |
| ENSGALT00000005721 | DARS2   |
| ENSGALT00000012192 | ANKRD2  |
| ENSGALT00000005829 |         |
| ENSGALT00000011075 |         |
| ENSGALT00000006190 | XPR1    |
| ENSGALT00000011195 | DLG1    |
| ENSGALT00000011255 |         |
| ENSGALT00000006981 |         |
| ENSGALT00000039466 |         |
| ENSGALT00000013047 |         |
| ENSGALT00000006306 | CEP350  |
| ENSGALT00000013063 | MTMR3   |

|                    |         |
|--------------------|---------|
| ENSGALT00000013195 |         |
| ENSGALT00000006691 |         |
| ENSGALT00000038026 |         |
| ENSGALT00000033698 |         |
| ENSGALT00000006824 |         |
| ENSGALT00000013265 |         |
| ENSGALT00000011583 |         |
| ENSGALT00000021800 | CHPF2   |
| ENSGALT00000012505 | FBXW4   |
| ENSGALT00000021776 | ASB10   |
| ENSGALT00000011646 | HRASLS  |
| ENSGALT00000007170 | RFWD2   |
| ENSGALT00000013435 | ANAPC1  |
| ENSGALT00000011822 |         |
| ENSGALT00000007248 | CACYBP  |
| ENSGALT00000011898 |         |
| ENSGALT00000012719 | KAZALD1 |
| ENSGALT00000039302 | SFXN3   |
| ENSGALT00000007329 | HEBP2   |
| ENSGALT00000028328 |         |
| ENSGALT00000039413 |         |
| ENSGALT00000012083 | PCYT1A  |
| ENSGALT00000013379 |         |
| ENSGALT00000013406 | MED13L  |
| ENSGALT00000001591 |         |
| ENSGALT00000013781 | RIN2    |
| ENSGALT00000013021 | FAM178A |
| ENSGALT00000013124 |         |
| ENSGALT00000013893 |         |
| ENSGALT00000007904 | MAP4    |
| ENSGALT00000013911 | KLHDC3  |
| ENSGALT00000013919 |         |
| ENSGALT00000031983 | KLC4    |
| ENSGALT00000033576 | C1orf21 |
| ENSGALT00000013188 |         |
| ENSGALT00000031981 |         |
| ENSGALT00000008265 |         |
| ENSGALT00000008354 | OLFM3   |
| ENSGALT00000014784 |         |
| ENSGALT00000008401 |         |
| ENSGALT00000033492 |         |
| ENSGALT00000008484 | KLHL40  |

|                    |         |
|--------------------|---------|
| ENSGALT0000008494  |         |
| ENSGALT0000008441  | VCAM1   |
| ENSGALT0000008467  |         |
| ENSGALT0000008474  | LRRC39  |
| ENSGALT0000033254  | PDE6D   |
| ENSGALT00000012571 | COPS7B  |
| ENSGALT00000014742 |         |
| ENSGALT00000014738 |         |
| ENSGALT00000008548 |         |
| ENSGALT00000008549 | HIAT1   |
| ENSGALT00000008683 | AGL     |
| ENSGALT00000014682 | CLIP4   |
| ENSGALT00000039166 |         |
| ENSGALT00000014608 | TRMT61B |
| ENSGALT00000008744 |         |
| ENSGALT00000008906 | PTBP2   |
| ENSGALT00000014542 | FBXO11  |
| ENSGALT00000008961 | ALG14   |
| ENSGALT00000014390 |         |
| ENSGALT00000039077 | CNN3    |
| ENSGALT00000014386 |         |
| ENSGALT00000009113 |         |
| ENSGALT00000008983 | TBRG4   |
| ENSGALT00000039079 |         |
| ENSGALT00000014275 | SPRED2  |
| ENSGALT00000012824 |         |
| ENSGALT00000009078 |         |
| ENSGALT00000014299 | GPAM    |
| ENSGALT00000009422 |         |
| ENSGALT00000014409 | ZDHHC6  |
| ENSGALT00000014431 |         |
| ENSGALT00000014249 |         |
| ENSGALT00000014245 |         |
| ENSGALT00000031978 | FBXO48  |
| ENSGALT00000009287 |         |
| ENSGALT00000031979 |         |
| ENSGALT00000009337 | BCAR3   |
| ENSGALT00000014214 | PCSK2   |
| ENSGALT00000014777 |         |
| ENSGALT00000038916 |         |
| ENSGALT00000009713 |         |
| ENSGALT00000014731 |         |

|                    |          |
|--------------------|----------|
| ENSGALT0000009417  |          |
| ENSGALT00000014689 | BTBD3    |
| ENSGALT00000014663 |          |
| ENSGALT00000009497 |          |
| ENSGALT00000009966 | XYLB     |
| ENSGALT00000014324 |          |
| ENSGALT00000014317 |          |
| ENSGALT00000014238 |          |
| ENSGALT00000013645 | EIF2B5   |
| ENSGALT00000013739 |          |
| ENSGALT00000013818 | ABCF3    |
| ENSGALT00000014091 |          |
| ENSGALT00000033354 |          |
| ENSGALT00000010164 |          |
| ENSGALT00000014035 |          |
| ENSGALT00000009984 | CCBL2    |
| ENSGALT00000015262 | PRDX3    |
| ENSGALT00000028082 |          |
| ENSGALT00000010087 | PKN2     |
| ENSGALT00000033333 |          |
| ENSGALT00000010099 |          |
| ENSGALT00000010388 | NOM1     |
| ENSGALT00000010467 |          |
| ENSGALT00000010570 | ESYT2    |
| ENSGALT00000015412 | SEC23IP  |
| ENSGALT00000015447 | WDR11    |
| ENSGALT00000010623 |          |
| ENSGALT00000033012 |          |
| ENSGALT00000014128 | SYDE2    |
| ENSGALT00000013868 | ATL2     |
| ENSGALT00000010875 |          |
| ENSGALT00000013852 | HNRNPLL  |
| ENSGALT00000011472 |          |
| ENSGALT00000038945 |          |
| ENSGALT00000011564 |          |
| ENSGALT00000014381 | TTLL7    |
| ENSGALT00000013878 | EIF4G1   |
| ENSGALT00000011573 |          |
| ENSGALT00000014453 | ELTD1    |
| ENSGALT00000015724 |          |
| ENSGALT00000001098 | TBC1D22B |
| ENSGALT00000014497 | DNAJB4   |

|                    |          |
|--------------------|----------|
| ENSGALT00000015848 |          |
| ENSGALT00000010681 | BCCIP    |
| ENSGALT00000014667 |          |
| ENSGALT00000001035 | CACNA1S  |
| ENSGALT00000040899 |          |
| ENSGALT00000021600 | SOS1     |
| ENSGALT00000011888 | MTPAP    |
| ENSGALT00000011932 | WAC      |
| ENSGALT00000011983 | MPP7     |
| ENSGALT00000012033 |          |
| ENSGALT00000012112 |          |
| ENSGALT00000016231 |          |
| ENSGALT00000004009 |          |
| ENSGALT00000014863 |          |
| ENSGALT00000016376 | KDM4A    |
| ENSGALT00000014998 | CRLS1    |
| ENSGALT00000017035 |          |
| ENSGALT00000015001 |          |
| ENSGALT00000012598 | KIAA1217 |
| ENSGALT00000012794 |          |
| ENSGALT00000012825 | COMMD3   |
| ENSGALT00000038548 | ST3GAL3  |
| ENSGALT00000000542 | IPO9     |
| ENSGALT00000017059 | BNIP3    |
| ENSGALT00000015061 | SDE2     |
| ENSGALT00000017087 | INPP5A   |
| ENSGALT00000012901 |          |
| ENSGALT00000012922 | PLXDC2   |
| ENSGALT00000013939 |          |
| ENSGALT00000014060 |          |
| ENSGALT00000003690 | ZNF609   |
| ENSGALT00000003455 | SNX22    |
| ENSGALT00000015194 |          |
| ENSGALT00000014097 | STAM     |
| ENSGALT00000014104 | PTPLA    |
| ENSGALT00000014117 |          |
| ENSGALT00000016418 |          |
| ENSGALT00000015319 | DISP1    |
| ENSGALT00000015332 | BROX     |
| ENSGALT00000014205 | PTER     |
| ENSGALT00000014135 |          |
| ENSGALT00000014256 | FAM171A1 |

|                    |          |
|--------------------|----------|
| ENSGALT00000015385 |          |
| ENSGALT00000014327 | CROT     |
| ENSGALT00000015441 | MARK1    |
| ENSGALT00000002999 |          |
| ENSGALT00000000195 |          |
| ENSGALT00000031945 | TGFB2    |
| ENSGALT00000033152 |          |
| ENSGALT00000015752 | KCTD3    |
| ENSGALT00000015924 |          |
| ENSGALT00000031937 | RPS6KC1  |
| ENSGALT00000015943 |          |
| ENSGALT00000031934 | VASH2    |
| ENSGALT00000016648 |          |
| ENSGALT00000015969 | NENF     |
| ENSGALT00000015970 | TMEM206  |
| ENSGALT00000015980 | PPP2R5A  |
| ENSGALT00000014487 |          |
| ENSGALT00000022855 | COX5A    |
| ENSGALT00000016009 |          |
| ENSGALT00000002612 | MPI      |
| ENSGALT00000016037 |          |
| ENSGALT00000016049 | RCOR3    |
| ENSGALT00000015304 | ANKIB1   |
| ENSGALT00000002583 | SCAMP2   |
| ENSGALT00000014768 |          |
| ENSGALT00000016717 | TMEM69   |
| ENSGALT00000016788 | MAST2    |
| ENSGALT00000000779 | PI16     |
| ENSGALT00000016077 |          |
| ENSGALT00000015329 | PEX1     |
| ENSGALT00000015427 |          |
| ENSGALT00000016989 | FAAH     |
| ENSGALT00000000864 | PPP1R15B |
| ENSGALT00000016111 | UBR2     |
| ENSGALT00000015485 | TFPI2    |
| ENSGALT00000028081 | PKDCC    |
| ENSGALT00000015498 |          |
| ENSGALT00000041398 |          |
| ENSGALT00000014612 | GNB4     |
| ENSGALT00000017008 |          |
| ENSGALT00000000908 | MDM4     |
| ENSGALT00000017068 |          |

|                    |          |
|--------------------|----------|
| ENSGALT0000002511  | SIN3A    |
| ENSGALT00000016201 | LRPPRC   |
| ENSGALT00000004220 | CSPG4    |
| ENSGALT00000014937 | NCEH1    |
| ENSGALT00000031920 |          |
| ENSGALT00000004357 |          |
| ENSGALT00000004380 | TSPAN3   |
| ENSGALT00000000950 | TMCC2    |
| ENSGALT00000038337 |          |
| ENSGALT00000016234 | SRBD1    |
| ENSGALT00000004485 | RCN2     |
| ENSGALT00000004731 | UBE2Q2   |
| ENSGALT00000000994 | ELK4     |
| ENSGALT00000016253 |          |
| ENSGALT00000001018 | SLC41A1  |
| ENSGALT00000017199 | TXNDC12  |
| ENSGALT00000017200 |          |
| ENSGALT00000016264 |          |
| ENSGALT00000017269 | ZFYVE9   |
| ENSGALT00000016269 |          |
| ENSGALT00000016270 |          |
| ENSGALT00000015414 |          |
| ENSGALT00000015416 |          |
| ENSGALT00000031908 |          |
| ENSGALT00000015429 |          |
| ENSGALT00000016306 |          |
| ENSGALT00000016321 | RBKS     |
| ENSGALT00000015740 | SGCE     |
| ENSGALT00000001255 |          |
| ENSGALT00000017302 |          |
| ENSGALT00000017321 | ECHDC2   |
| ENSGALT00000001297 | MAPKAPK2 |
| ENSGALT00000016469 | GLO1     |
| ENSGALT00000015772 | ASB4     |
| ENSGALT00000015790 |          |
| ENSGALT00000017326 | SCP2     |
| ENSGALT00000034634 |          |
| ENSGALT00000040356 |          |
| ENSGALT00000005141 | DNAJA4   |
| ENSGALT00000016480 | ZFAND3   |
| ENSGALT00000005233 |          |
| ENSGALT00000039672 |          |



|                    |          |
|--------------------|----------|
| ENSGALT00000015869 |          |
| ENSGALT00000005378 | FBXL22   |
| ENSGALT00000017402 | MIOS     |
| ENSGALT00000016499 | CMTR1    |
| ENSGALT00000017329 | PODN     |
| ENSGALT00000017404 | RPA3     |
| ENSGALT00000037997 | RPA3-AS1 |
| ENSGALT00000001786 | CD34     |
| ENSGALT00000015516 | NMD3     |
| ENSGALT00000015523 | PPM1L    |
| ENSGALT00000015544 |          |
| ENSGALT00000039192 |          |
| ENSGALT00000038176 | RNF8     |
| ENSGALT00000015632 |          |
| ENSGALT00000015634 |          |
| ENSGALT00000016540 | SLC35B2  |
| ENSGALT00000015688 | GFM1     |
| ENSGALT00000038145 |          |
| ENSGALT00000017449 |          |
| ENSGALT00000039093 | MLF1     |
| ENSGALT00000016725 | TMEM63B  |
| ENSGALT00000017469 | NDC1     |
| ENSGALT00000017477 |          |
| ENSGALT00000002207 | ATP5F1   |
| ENSGALT00000002238 | RAP1A    |
| ENSGALT00000032981 | C3orf55  |
| ENSGALT00000017480 | LRRC42   |
| ENSGALT00000017484 |          |
| ENSGALT00000017487 |          |
| ENSGALT00000016736 | MRPL14   |
| ENSGALT00000017745 | RAPGEF5  |
| ENSGALT00000017540 | ACOT11   |
| ENSGALT00000016751 |          |
| ENSGALT00000002661 | LRIG2    |
| ENSGALT00000017560 |          |
| ENSGALT00000006011 | BNIP2    |
| ENSGALT00000017568 | USP24    |
| ENSGALT00000017589 |          |
| ENSGALT00000016730 |          |
| ENSGALT00000016761 | SLC33A1  |
| ENSGALT00000003002 | HIPK1    |
| ENSGALT00000017683 | FGGY     |

|                    |         |
|--------------------|---------|
| ENSGALT00000017829 | MALSU1  |
| ENSGALT00000016815 |         |
| ENSGALT00000017877 |         |
| ENSGALT00000017882 | CCDC126 |
| ENSGALT00000034521 | MCEE    |
| ENSGALT00000017975 |         |
| ENSGALT00000006347 | TARSL2  |
| ENSGALT00000017979 |         |
| ENSGALT00000032964 | TM2D1   |
| ENSGALT00000018006 |         |
| ENSGALT00000016864 |         |
| ENSGALT00000018034 |         |
| ENSGALT00000018085 |         |
| ENSGALT00000017909 | EFCAB7  |
| ENSGALT00000018131 |         |
| ENSGALT00000018199 | CHN2    |
| ENSGALT00000017953 |         |
| ENSGALT00000003247 |         |
| ENSGALT00000018212 | WIPF3   |
| ENSGALT00000018231 | FKBP14  |
| ENSGALT00000018282 |         |
| ENSGALT00000034417 |         |
| ENSGALT00000018291 |         |
| ENSGALT00000018312 | ANKRD28 |
| ENSGALT00000018327 | DPH3    |
| ENSGALT00000016977 | ZNF318  |
| ENSGALT00000016982 |         |
| ENSGALT00000018329 |         |
| ENSGALT00000018331 |         |
| ENSGALT00000017995 |         |
| ENSGALT00000040028 |         |
| ENSGALT00000040026 |         |
| ENSGALT00000018348 | PLCL2   |
| ENSGALT00000018357 | TBC1D5  |
| ENSGALT00000018402 | KAT2B   |
| ENSGALT00000001028 | RFX7    |
| ENSGALT00000017165 |         |
| ENSGALT00000038194 |         |
| ENSGALT00000018407 | ZNF385D |
| ENSGALT00000007059 |         |
| ENSGALT00000018418 | NKIRAS1 |
| ENSGALT00000016952 | WWTR1   |

|                    |           |
|--------------------|-----------|
| ENSGALT0000007264  |           |
| ENSGALT00000018328 |           |
| ENSGALT00000018364 |           |
| ENSGALT00000018434 |           |
| ENSGALT00000018443 |           |
| ENSGALT00000018455 | ANKRD13C  |
| ENSGALT00000016995 | HPS3      |
| ENSGALT00000017002 |           |
| ENSGALT00000017274 | QPCT      |
| ENSGALT00000017280 |           |
| ENSGALT00000017288 |           |
| ENSGALT00000018456 | OXSM      |
| ENSGALT00000018458 | LRRC3B    |
| ENSGALT00000017328 | TFB2M     |
| ENSGALT00000004387 |           |
| ENSGALT00000018638 | AZI2      |
| ENSGALT00000017370 |           |
| ENSGALT00000017414 | ZBTB18    |
| ENSGALT00000018718 | GPD1L     |
| ENSGALT00000017618 | ERO1LB    |
| ENSGALT00000017890 | NID1      |
| ENSGALT00000018736 | TCAIM     |
| ENSGALT00000004102 | GGPS1     |
| ENSGALT00000000385 | ARID4B    |
| ENSGALT00000007734 | SEMA6D    |
| ENSGALT00000018770 | ANO10     |
| ENSGALT00000022567 | TOMM20    |
| ENSGALT00000018780 |           |
| ENSGALT00000018812 | EAF1      |
| ENSGALT00000017944 |           |
| ENSGALT00000018839 |           |
| ENSGALT00000018846 | CAPN7     |
| ENSGALT00000018026 |           |
| ENSGALT00000018064 |           |
| ENSGALT00000034280 | SECISBP2L |
| ENSGALT00000018081 | TAF5L     |
| ENSGALT00000005108 | APOBEC2   |
| ENSGALT00000005111 |           |
| ENSGALT00000018903 | ATP2C1    |
| ENSGALT00000018940 |           |
| ENSGALT00000018217 |           |
| ENSGALT00000018251 |           |

|                    |         |
|--------------------|---------|
| ENSGALT00000019087 | DNAJC13 |
| ENSGALT00000018269 | SMOC2   |
| ENSGALT00000009244 |         |
| ENSGALT00000005500 |         |
| ENSGALT00000018633 | FGFR1OP |
| ENSGALT00000018720 |         |
| ENSGALT00000018857 | PARK2   |
| ENSGALT00000018893 | MAP3K4  |
| ENSGALT00000009637 | PDE8A   |
| ENSGALT00000009646 | FSD2    |
| ENSGALT00000009670 |         |
| ENSGALT00000009692 |         |
| ENSGALT00000009702 |         |
| ENSGALT00000019010 |         |
| ENSGALT00000005617 | PRELP   |
| ENSGALT00000019329 | SACM1L  |
| ENSGALT00000010337 |         |
| ENSGALT00000019061 | WTAP    |
| ENSGALT00000019062 |         |
| ENSGALT00000019065 | FNDC1   |
| ENSGALT00000031806 |         |
| ENSGALT00000020066 | FBXO30  |
| ENSGALT00000019393 | ZDHHC3  |
| ENSGALT00000020182 | TAB2    |
| ENSGALT00000020197 |         |
| ENSGALT00000010523 |         |
| ENSGALT00000010528 |         |
| ENSGALT00000020225 | NUP43   |
| ENSGALT00000037591 |         |
| ENSGALT00000031799 | LRP11   |
| ENSGALT00000020285 | MTHFD1L |
| ENSGALT00000021152 |         |
| ENSGALT00000019473 | TRAK1   |
| ENSGALT00000019478 | EIF1B   |
| ENSGALT00000022168 |         |
| ENSGALT00000022182 | SCAF8   |
| ENSGALT00000019495 |         |
| ENSGALT00000022259 | TMEM242 |
| ENSGALT00000022265 | ZDHHC14 |
| ENSGALT00000019569 |         |
| ENSGALT00000022311 | SYNJ2   |
| ENSGALT00000031788 | DYNLT1  |

|                    |          |
|--------------------|----------|
| ENSGALT00000010834 |          |
| ENSGALT00000022346 | PLAGL1   |
| ENSGALT00000022358 | LTV1     |
| ENSGALT00000019702 | MLH1     |
| ENSGALT00000022374 | PEX3     |
| ENSGALT00000022379 | AIG1     |
| ENSGALT00000022415 | VTA1     |
| ENSGALT00000019716 | EPDR1    |
| ENSGALT00000011156 | FAM174B  |
| ENSGALT00000011260 | CHD2     |
| ENSGALT00000022522 | MAP3K5   |
| ENSGALT00000019843 | HERPUD2  |
| ENSGALT00000022595 | PDE7B    |
| ENSGALT00000022607 | AHI1     |
| ENSGALT00000022632 |          |
| ENSGALT00000019858 |          |
| ENSGALT00000022653 | SLC2A12  |
| ENSGALT00000022662 | EYA4     |
| ENSGALT00000019894 |          |
| ENSGALT00000022671 |          |
| ENSGALT00000019908 |          |
| ENSGALT00000037476 |          |
| ENSGALT00000004596 |          |
| ENSGALT00000031116 | RP9      |
| ENSGALT00000019924 | KBTBD2   |
| ENSGALT00000019935 | LSM5     |
| ENSGALT00000022702 | ARHGAP18 |
| ENSGALT00000022704 | LAMA2    |
| ENSGALT00000031751 | KIAA0408 |
| ENSGALT00000023965 | TRDN     |
| ENSGALT00000023989 |          |
| ENSGALT00000020113 | YAE1D1   |
| ENSGALT00000011601 |          |
| ENSGALT00000011612 |          |
| ENSGALT00000020152 | C7orf25  |
| ENSGALT00000031107 |          |
| ENSGALT00000020177 |          |
| ENSGALT00000020178 | BLVRA    |
| ENSGALT00000024033 | NUS1     |
| ENSGALT00000031104 | VOPP1    |
| ENSGALT00000020187 | LANCL2   |
| ENSGALT00000037413 |          |

|                    |         |
|--------------------|---------|
| ENSGALT00000024042 | DCBLD1  |
| ENSGALT00000020200 | TPK1    |
| ENSGALT00000024059 |         |
| ENSGALT00000020295 |         |
| ENSGALT00000011754 |         |
| ENSGALT00000020338 |         |
| ENSGALT00000020352 |         |
| ENSGALT00000024093 | KPNA5   |
| ENSGALT00000031721 |         |
| ENSGALT00000024128 |         |
| ENSGALT00000024132 | NT5DC1  |
| ENSGALT00000020597 | COL15A1 |
| ENSGALT00000024267 |         |
| ENSGALT00000011900 | CILP    |
| ENSGALT00000020646 |         |
| ENSGALT00000012036 | DPP8    |
| ENSGALT00000020648 | NFATC1  |
| ENSGALT00000020670 | ALDH5A1 |
| ENSGALT00000020676 | MRS2    |
| ENSGALT00000020688 | CDKAL1  |
| ENSGALT00000024687 | FOXO3   |
| ENSGALT00000024698 | LACE1   |
| ENSGALT00000024702 |         |
| ENSGALT00000012111 |         |
| ENSGALT00000024713 |         |
| ENSGALT00000024718 | BEND3   |
| ENSGALT00000024723 |         |
| ENSGALT00000012122 | DENND4A |
| ENSGALT00000024849 |         |
| ENSGALT00000037256 |         |
| ENSGALT00000024935 |         |
| ENSGALT00000024942 | TSTD1   |
| ENSGALT00000020725 | RANBP9  |
| ENSGALT00000012312 |         |
| ENSGALT00000012462 |         |
| ENSGALT00000031683 |         |
| ENSGALT00000025147 | MAP3K7  |
| ENSGALT00000020743 |         |
| ENSGALT00000020760 | CAP2    |
| ENSGALT00000025442 |         |
| ENSGALT00000020851 |         |
| ENSGALT00000020852 |         |

|                    |          |
|--------------------|----------|
| ENSGALT00000020859 |          |
| ENSGALT00000020862 | BMP6     |
| ENSGALT00000025446 | PM20D2   |
| ENSGALT00000025464 |          |
| ENSGALT00000031045 |          |
| ENSGALT00000020881 |          |
| ENSGALT00000020885 |          |
| ENSGALT00000020890 | FARS2    |
| ENSGALT00000020897 | ECI2     |
| ENSGALT00000025551 | PRSS35   |
| ENSGALT00000020905 | PXDC1    |
| ENSGALT00000020909 | SLC22A23 |
| ENSGALT00000025575 | IBTK     |
| ENSGALT00000020914 |          |
| ENSGALT00000020918 | BPHL     |
| ENSGALT00000020945 | GMDS     |
| ENSGALT00000020983 |          |
| ENSGALT00000025624 | SENP6    |
| ENSGALT00000025629 |          |
| ENSGALT00000012959 |          |
| ENSGALT00000021151 | FAM105B  |
| ENSGALT00000021178 | TRIO     |
| ENSGALT00000021258 | MARCH6   |
| ENSGALT00000021280 | SBK2     |
| ENSGALT00000021302 | SEMA5A   |
| ENSGALT00000026237 |          |
| ENSGALT00000021306 | MTRR     |
| ENSGALT00000026251 | ZNF451   |
| ENSGALT00000021320 | ADCY2    |
| ENSGALT00000021443 |          |
| ENSGALT00000026298 | MLIP     |
| ENSGALT00000026310 | KLHL31   |
| ENSGALT00000021488 |          |
| ENSGALT00000026320 | GCLC     |
| ENSGALT00000021491 |          |
| ENSGALT00000026321 |          |
| ENSGALT00000021505 |          |
| ENSGALT00000026329 |          |
| ENSGALT00000026335 |          |
| ENSGALT00000021546 |          |
| ENSGALT00000021552 | NDUFS6   |
| ENSGALT00000026340 | AGPAT5   |

|                    |         |
|--------------------|---------|
| ENSGALT00000026360 |         |
| ENSGALT00000021558 | GALNT12 |
| ENSGALT00000031625 |         |
| ENSGALT00000026395 |         |
| ENSGALT00000013352 |         |
| ENSGALT00000013365 |         |
| ENSGALT00000026413 | PXDN    |
| ENSGALT00000021854 | PDCD6   |
| ENSGALT00000021930 | ERP44   |
| ENSGALT00000026450 |         |
| ENSGALT00000015891 |         |
| ENSGALT00000022087 | NR4A3   |
| ENSGALT00000022115 | BLOC1S4 |
| ENSGALT00000022165 |         |
| ENSGALT00000026493 | CPSF3   |
| ENSGALT00000015890 |         |
| ENSGALT00000022178 | ACOT13  |
| ENSGALT00000022206 | ZNF236  |
| ENSGALT00000026523 |         |
| ENSGALT00000026524 |         |
| ENSGALT00000022232 | TSHZ1   |
| ENSGALT00000036936 | ZADH2   |
| ENSGALT00000013464 | TMED3   |
| ENSGALT00000022289 |         |
| ENSGALT00000021988 | PPP6R2  |
| ENSGALT00000020337 | SBF1    |
| ENSGALT00000022290 | TIMM21  |
| ENSGALT00000040414 |         |
| ENSGALT00000025383 |         |
| ENSGALT00000022349 | TMX3    |
| ENSGALT00000026538 | PDIA6   |
| ENSGALT00000022432 | TNPO3   |
| ENSGALT00000013005 | KLHDC10 |
| ENSGALT00000033574 |         |
| ENSGALT00000022519 | RNMT    |
| ENSGALT00000022517 |         |
| ENSGALT00000022497 | SEH1L   |
| ENSGALT00000013037 | TMEM209 |
| ENSGALT00000013516 |         |
| ENSGALT00000022485 | PSMG2   |
| ENSGALT00000033572 |         |
| ENSGALT00000022445 |         |



|                    |         |
|--------------------|---------|
| ENSGALT00000031591 | RDH14   |
| ENSGALT00000026589 | SDC1    |
| ENSGALT00000029656 |         |
| ENSGALT00000028442 |         |
| ENSGALT00000013703 | PPP4R1  |
| ENSGALT00000013581 |         |
| ENSGALT00000013684 |         |
| ENSGALT00000013683 | ANKRD12 |
| ENSGALT00000026614 |         |
| ENSGALT00000023134 | NDUFV2  |
| ENSGALT00000031579 | C2orf44 |
| ENSGALT00000026617 |         |
| ENSGALT00000013589 |         |
| ENSGALT00000010489 | CHCHD3  |
| ENSGALT00000014003 | IQGAP1  |
| ENSGALT00000011162 | ITIH5   |
| ENSGALT00000010913 |         |
| ENSGALT00000036879 |         |
| ENSGALT00000026632 | FNDC4   |
| ENSGALT00000010889 |         |
| ENSGALT00000010817 | UPF2    |
| ENSGALT00000005822 | DHTKD1  |
| ENSGALT00000022642 | SEC61A2 |
| ENSGALT00000023489 | PHYH    |
| ENSGALT00000023921 | EMILIN2 |
| ENSGALT00000029187 |         |
| ENSGALT00000036791 |         |
| ENSGALT00000026684 |         |
| ENSGALT00000010596 |         |
| ENSGALT00000026714 | HADHB   |
| ENSGALT00000026723 |         |
| ENSGALT00000039749 |         |
| ENSGALT00000023980 |         |
| ENSGALT00000026763 | SCARA5  |
| ENSGALT00000013557 |         |
| ENSGALT00000013555 | RSBN1L  |
| ENSGALT00000013546 | PTPN12  |
| ENSGALT00000013522 |         |
| ENSGALT00000013515 | FAM185A |
| ENSGALT00000013512 |         |
| ENSGALT00000013482 |         |
| ENSGALT00000013473 |         |

|                    |         |
|--------------------|---------|
| ENSGALT00000013428 |         |
| ENSGALT00000013382 |         |
| ENSGALT00000024064 | USP14   |
| ENSGALT00000013290 |         |
| ENSGALT00000013245 | SRPK2   |
| ENSGALT00000013172 | ATXN7L1 |
| ENSGALT00000026845 | EXTL3   |
| ENSGALT00000026848 |         |
| ENSGALT00000013062 |         |
| ENSGALT00000039460 | DUS4L   |
| ENSGALT00000026878 |         |
| ENSGALT00000013000 |         |
| ENSGALT00000024095 | ABHD3   |
| ENSGALT00000024152 | MIB1    |
| ENSGALT00000026894 |         |
| ENSGALT00000031549 |         |
| ENSGALT00000012832 | LAMB1   |
| ENSGALT00000026905 | TRAM2   |
| ENSGALT00000024186 | CABLES1 |
| ENSGALT00000024197 | RIOK3   |
| ENSGALT00000011632 |         |
| ENSGALT00000026909 |         |
| ENSGALT00000024206 | C18orf8 |
| ENSGALT00000011493 | KIF21A  |
| ENSGALT00000024240 | NPC1    |
| ENSGALT00000026965 | RCAN2   |
| ENSGALT00000013914 |         |
| ENSGALT00000013929 |         |
| ENSGALT00000027001 |         |
| ENSGALT00000024335 | OSBPL1A |
| ENSGALT00000021457 | PLXNB2  |
| ENSGALT00000024382 | ZNF521  |
| ENSGALT00000024398 |         |
| ENSGALT00000014328 | ASB15   |
| ENSGALT00000014337 |         |
| ENSGALT00000014340 | IQUB    |
| ENSGALT00000014357 |         |
| ENSGALT00000014559 | AASS    |
| ENSGALT00000014601 |         |
| ENSGALT00000014649 | CPED1   |
| ENSGALT00000015281 |         |
| ENSGALT00000015293 |         |

|                    |          |
|--------------------|----------|
| ENSGALT00000024463 | TRAPPC8  |
| ENSGALT00000015373 | TMEM168  |
| ENSGALT00000030698 | LSMEM1   |
| ENSGALT00000015454 |          |
| ENSGALT00000015456 |          |
| ENSGALT00000015471 |          |
| ENSGALT00000015558 | PRICKLE1 |
| ENSGALT00000015593 | ADAMTS20 |
| ENSGALT00000015636 | TMEM117  |
| ENSGALT00000015735 | ARID2    |
| ENSGALT00000015837 |          |
| ENSGALT00000024545 | DTNA     |
| ENSGALT00000015861 |          |
| ENSGALT00000015878 |          |
| ENSGALT00000015976 |          |
| ENSGALT00000015981 | RPL18A   |
| ENSGALT00000015988 |          |
| ENSGALT00000016002 |          |
| ENSGALT00000016025 |          |
| ENSGALT00000016059 |          |
| ENSGALT00000016099 | CAND1    |
| ENSGALT00000016139 |          |
| ENSGALT00000016170 |          |
| ENSGALT00000021064 | MCM4     |
| ENSGALT00000016330 | PTPRB    |
| ENSGALT00000041400 | C8orf22  |
| ENSGALT00000016553 | RAB21    |
| ENSGALT00000024605 |          |
| ENSGALT00000016566 |          |
| ENSGALT00000022162 |          |
| ENSGALT00000024757 |          |
| ENSGALT00000029932 |          |
| ENSGALT00000024867 |          |
| ENSGALT00000024871 | PENK     |
| ENSGALT00000024873 | IMPAD1   |
| ENSGALT00000024899 |          |
| ENSGALT00000018268 |          |
| ENSGALT00000018392 |          |
| ENSGALT00000018400 |          |
| ENSGALT00000018413 |          |
| ENSGALT00000030642 |          |
| ENSGALT00000024998 | GGH      |

|                    |         |
|--------------------|---------|
| ENSGALT00000018472 | TMCC3   |
| ENSGALT00000018479 |         |
| ENSGALT00000022941 | ADHFE1  |
| ENSGALT00000018639 |         |
| ENSGALT00000025029 |         |
| ENSGALT00000018679 | CDK17   |
| ENSGALT00000018716 |         |
| ENSGALT00000038256 |         |
| ENSGALT00000023424 |         |
| ENSGALT00000025048 | CSPP1   |
| ENSGALT00000018870 |         |
| ENSGALT00000025181 |         |
| ENSGALT00000030877 |         |
| ENSGALT00000019040 |         |
| ENSGALT00000019063 | NUP205  |
| ENSGALT00000025372 |         |
| ENSGALT00000025427 |         |
| ENSGALT00000025468 |         |
| ENSGALT00000019173 |         |
| ENSGALT00000030620 |         |
| ENSGALT00000025563 |         |
| ENSGALT00000030617 |         |
| ENSGALT00000019356 |         |
| ENSGALT00000019412 |         |
| ENSGALT00000025647 | DECR1   |
| ENSGALT00000019461 | NHP2L1  |
| ENSGALT00000019464 | DESI1   |
| ENSGALT00000019494 |         |
| ENSGALT00000019497 |         |
| ENSGALT00000037963 |         |
| ENSGALT00000025676 |         |
| ENSGALT00000025692 |         |
| ENSGALT00000025711 |         |
| ENSGALT00000019589 | XPNPEP3 |
| ENSGALT00000025714 | RNF151  |
| ENSGALT00000025742 | DPY19L4 |
| ENSGALT00000030837 | NDUFAF6 |
| ENSGALT00000025772 |         |
| ENSGALT00000025777 |         |
| ENSGALT00000023439 | MATN2   |
| ENSGALT00000030604 |         |
| ENSGALT00000019954 |         |

|                    |          |
|--------------------|----------|
| ENSGALT00000030825 | POLR2K   |
| ENSGALT00000025842 | RNF19A   |
| ENSGALT00000023333 |          |
| ENSGALT00000020100 | ANKRD54  |
| ENSGALT00000025883 | ATP6V1C1 |
| ENSGALT00000020453 |          |
| ENSGALT00000025898 |          |
| ENSGALT00000020490 |          |
| ENSGALT00000037765 |          |
| ENSGALT00000020504 | HMGXB4   |
| ENSGALT00000025906 | LRP12    |
| ENSGALT00000025913 | ABRA     |
| ENSGALT00000025930 |          |
| ENSGALT00000025937 |          |
| ENSGALT00000020590 | RTCB     |
| ENSGALT00000030816 |          |
| ENSGALT00000025971 |          |
| ENSGALT00000025969 | UTP23    |
| ENSGALT00000025965 |          |
| ENSGALT00000020629 |          |
| ENSGALT00000020663 | CKAP4    |
| ENSGALT00000020668 | NUAK1    |
| ENSGALT00000026475 |          |
| ENSGALT00000026431 |          |
| ENSGALT00000020683 |          |
| ENSGALT00000026325 | KIAA0196 |
| ENSGALT00000026313 | TRIB1    |
| ENSGALT00000026309 |          |
| ENSGALT00000020769 |          |
| ENSGALT00000030784 | FAM49B   |
| ENSGALT00000020773 |          |
| ENSGALT00000020821 |          |
| ENSGALT00000020822 | CCDC53   |
| ENSGALT00000020826 | GNPTAB   |
| ENSGALT00000020835 |          |
| ENSGALT00000020864 | PARP12   |
| ENSGALT00000020873 | HIPK2    |
| ENSGALT00000026044 | GPR20    |
| ENSGALT00000026043 | PTP4A3   |
| ENSGALT00000026025 |          |
| ENSGALT00000020934 |          |
| ENSGALT00000020953 | KDM7A    |

|                    |          |
|--------------------|----------|
| ENSGALT00000020996 | AGK      |
| ENSGALT00000021056 | SYT10    |
| ENSGALT00000021073 | YARS2    |
| ENSGALT00000021086 |          |
| ENSGALT00000021134 | TMTC1    |
| ENSGALT00000021203 | NINJ2    |
| ENSGALT00000021281 |          |
| ENSGALT00000021332 |          |
| ENSGALT00000021337 |          |
| ENSGALT00000021340 |          |
| ENSGALT00000021374 |          |
| ENSGALT00000021380 |          |
| ENSGALT00000021517 |          |
| ENSGALT00000021594 |          |
| ENSGALT00000021626 | ABCC9    |
| ENSGALT00000022801 | ASUN     |
| ENSGALT00000022820 |          |
| ENSGALT00000022856 | CYB5R3   |
| ENSGALT00000022912 |          |
| ENSGALT00000022945 | SULT4A1  |
| ENSGALT00000022959 |          |
| ENSGALT00000022966 | PARVB    |
| ENSGALT00000022998 |          |
| ENSGALT00000023003 | KIAA0930 |
| ENSGALT00000022888 |          |
| ENSGALT00000027944 |          |
| ENSGALT00000030043 |          |
| ENSGALT00000023174 | TSPAN9   |
| ENSGALT00000021894 | TULP3    |
| ENSGALT00000023158 |          |
| ENSGALT00000023157 | NECAP1   |
| ENSGALT00000023197 | MAN1A2   |
| ENSGALT00000023287 |          |
| ENSGALT00000023289 | FAM162A  |
| ENSGALT00000022680 | FBXO40   |
| ENSGALT00000023323 |          |
| ENSGALT00000023360 |          |
| ENSGALT00000023361 |          |
| ENSGALT00000023442 |          |
| ENSGALT00000023485 |          |
| ENSGALT00000023492 |          |
| ENSGALT00000023496 | LPCAT3   |

|                    |          |
|--------------------|----------|
| ENSGALT00000023545 |          |
| ENSGALT00000023646 | CLSTN3   |
| ENSGALT00000023710 |          |
| ENSGALT00000023808 | STYK1    |
| ENSGALT00000023883 | GDAP2    |
| ENSGALT00000023902 |          |
| ENSGALT00000024021 |          |
| ENSGALT00000024035 |          |
| ENSGALT00000036952 |          |
| ENSGALT00000024316 | B4GALT3  |
| ENSGALT00000024333 | IGSF11   |
| ENSGALT00000024530 |          |
| ENSGALT00000024570 | BLZF1    |
| ENSGALT00000024577 | NME7     |
| ENSGALT00000030447 | DPT      |
| ENSGALT00000024599 | TIPRL    |
| ENSGALT00000024644 | CMSS1    |
| ENSGALT00000024648 | FILIP1L  |
| ENSGALT00000024670 | TOMM70A  |
| ENSGALT00000024704 | ABI3BP   |
| ENSGALT00000024756 | RPL24    |
| ENSGALT00000036897 | HHLA2    |
| ENSGALT00000024797 | PVRL3    |
| ENSGALT00000024837 |          |
| ENSGALT00000024843 | C3orf38  |
| ENSGALT00000024855 | PROS1    |
| ENSGALT00000024895 | DCAF6    |
| ENSGALT00000024900 |          |
| ENSGALT00000030405 |          |
| ENSGALT00000024975 |          |
| ENSGALT00000024990 |          |
| ENSGALT00000025002 | GBE1     |
| ENSGALT00000036824 |          |
| ENSGALT00000025349 | CHODL    |
| ENSGALT00000025402 | ATP5J    |
| ENSGALT00000025479 |          |
| ENSGALT00000025487 | RWDD2B   |
| ENSGALT00000025511 | MAP3K7CL |
| ENSGALT00000025518 | BACH1    |
| ENSGALT00000025609 |          |
| ENSGALT00000025738 |          |
| ENSGALT00000025792 |          |

|                    |         |
|--------------------|---------|
| ENSGALT00000025800 |         |
| ENSGALT00000025863 | DSCR3   |
| ENSGALT00000025866 |         |
| ENSGALT00000025873 |         |
| ENSGALT00000025891 |         |
| ENSGALT00000036704 |         |
| ENSGALT00000026100 | PKNOX1  |
| ENSGALT00000026124 |         |
| ENSGALT00000026125 | AGPAT3  |
| ENSGALT00000030337 |         |
| ENSGALT00000026137 | CXorf36 |
| ENSGALT00000026167 |         |
| ENSGALT00000026174 |         |
| ENSGALT00000026207 |         |
| ENSGALT00000026220 |         |
| ENSGALT00000026255 | TAB3    |
| ENSGALT00000026256 |         |
| ENSGALT00000026334 |         |
| ENSGALT00000026357 |         |
| ENSGALT00000026363 |         |
| ENSGALT00000026366 | APOO    |
| ENSGALT00000026387 | PRDX4   |
| ENSGALT00000030302 | SMPX    |
| ENSGALT00000026456 | RPS6KA3 |
| ENSGALT00000026483 | CXorf23 |
| ENSGALT00000026498 | MAP3K15 |
| ENSGALT00000026507 |         |
| ENSGALT00000026711 |         |
| ENSGALT00000026728 | ASB11   |
| ENSGALT00000026753 |         |
| ENSGALT00000026761 |         |
| ENSGALT00000026762 |         |
| ENSGALT00000026770 |         |
| ENSGALT00000026803 | CLCN4   |
| ENSGALT00000026917 | DHRX    |
| ENSGALT00000026928 | ASMTL   |
| ENSGALT00000026955 | PPP2R3B |
| ENSGALT00000026993 |         |
| ENSGALT00000027031 | ATP10A  |
| ENSGALT00000027040 | UBE3A   |
| ENSGALT00000036592 |         |
| ENSGALT00000027049 | INPP4A  |



|                    |           |
|--------------------|-----------|
| ENSGALT00000027060 | MITD1     |
| ENSGALT00000036589 | TXNDC9    |
| ENSGALT00000027078 |           |
| ENSGALT00000027087 | CNOT11    |
| ENSGALT00000027090 | RNF149    |
| ENSGALT00000027111 | MFSD9     |
| ENSGALT00000027114 |           |
| ENSGALT00000027119 | FHL2      |
| ENSGALT00000027121 |           |
| ENSGALT00000027123 | UXS1      |
| ENSGALT00000036568 |           |
| ENSGALT00000027149 |           |
| ENSGALT00000027160 |           |
| ENSGALT00000027189 | TUBGCP3   |
| ENSGALT00000027208 |           |
| ENSGALT00000027212 | CARKD     |
| ENSGALT00000027229 |           |
| ENSGALT00000027236 |           |
| ENSGALT00000027240 | KDELC1    |
| ENSGALT00000027243 | METTL21C  |
| ENSGALT00000027247 | ITGBL1    |
| ENSGALT00000027264 | CLYBL     |
| ENSGALT00000027267 | TM9SF2    |
| ENSGALT00000027273 | DOCK9     |
| ENSGALT00000027289 |           |
| ENSGALT00000027314 | GPR180    |
| ENSGALT00000027349 | CLN5      |
| ENSGALT00000027356 |           |
| ENSGALT00000027358 | COMMD6    |
| ENSGALT00000027364 | KLF5      |
| ENSGALT00000027373 |           |
| ENSGALT00000027404 | VWA8      |
| ENSGALT00000027417 |           |
| ENSGALT00000027432 | SLC25A30  |
| ENSGALT00000027443 |           |
| ENSGALT00000027446 | KIAA0226L |
| ENSGALT00000027451 |           |
| ENSGALT00000027453 |           |
| ENSGALT00000030149 |           |
| ENSGALT00000036484 |           |
| ENSGALT00000027476 |           |
| ENSGALT00000027505 |           |

|                    |         |
|--------------------|---------|
| ENSGALT00000027509 |         |
| ENSGALT00000027522 |         |
| ENSGALT00000027523 | COG6    |
| ENSGALT00000027525 | LHFP    |
| ENSGALT00000027527 | PROSER1 |
| ENSGALT00000027531 |         |
| ENSGALT00000027540 |         |
| ENSGALT00000027584 | B3GALTL |
| ENSGALT00000027586 |         |
| ENSGALT00000027597 |         |
| ENSGALT00000030102 | POMP    |
| ENSGALT00000027648 | MTMR6   |
| ENSGALT00000027655 | MIPEP   |
| ENSGALT00000027657 |         |
| ENSGALT00000027661 | SGCG    |
| ENSGALT00000027664 | MICU2   |
| ENSGALT00000027671 |         |
| ENSGALT00000027676 |         |
| ENSGALT00000027677 |         |
| ENSGALT00000027680 |         |
| ENSGALT00000027690 |         |
| ENSGALT00000021058 |         |
| ENSGALT00000027711 | KDELC2  |
| ENSGALT00000027718 |         |
| ENSGALT00000027725 | CUL5    |
| ENSGALT00000027757 | DCUN1D5 |
| ENSGALT00000036427 |         |
| ENSGALT00000027810 | SESN3   |
| ENSGALT00000027816 |         |
| ENSGALT00000027818 | ANKRD49 |
| ENSGALT00000027831 |         |
| ENSGALT00000027869 | CTSC    |
| ENSGALT00000027880 | ME3     |
| ENSGALT00000027882 | RAB30   |
| ENSGALT00000027884 | PCF11   |
| ENSGALT00000027888 | CCDC90B |
| ENSGALT00000022773 |         |
| ENSGALT00000002817 |         |
| ENSGALT00000027904 | NARS2   |
| ENSGALT00000002458 | AQP11   |
| ENSGALT00000001192 | LRRC32  |
| ENSGALT00000036387 |         |

|                    |          |
|--------------------|----------|
| ENSGALT0000001279  | RNF121   |
| ENSGALT00000028034 |          |
| ENSGALT00000028035 | STIM1    |
| ENSGALT00000022062 |          |
| ENSGALT00000014840 | DGAT2    |
| ENSGALT00000018287 |          |
| ENSGALT00000031276 |          |
| ENSGALT00000027989 |          |
| ENSGALT00000026436 | KLHL34   |
| ENSGALT00000026765 | TCEANC   |
| ENSGALT00000027059 |          |
| ENSGALT00000027144 | CHAMP1   |
| ENSGALT00000027875 | PRSS23   |
| ENSGALT00000007813 | TMEM119  |
| ENSGALT00000010788 | PPP1R3C  |
| ENSGALT00000024049 | HSPB3    |
| ENSGALT00000024541 |          |
| ENSGALT00000001984 |          |
| ENSGALT00000011424 | FAM43A   |
| ENSGALT00000017230 | FLRT2    |
| ENSGALT00000019144 |          |
| ENSGALT00000022862 | A4GALT   |
| ENSGALT00000006628 | FEM1A    |
| ENSGALT00000002482 | UTS2R    |
| ENSGALT00000011909 |          |
| ENSGALT00000014235 |          |
| ENSGALT00000001876 |          |
| ENSGALT00000030942 | LRRC30   |
| ENSGALT00000026439 | ZHX2     |
| ENSGALT00000026354 |          |
| ENSGALT00000007889 |          |
| ENSGALT00000014752 |          |
| ENSGALT00000018781 |          |
| ENSGALT00000013613 |          |
| ENSGALT00000013616 | THBD     |
| ENSGALT00000017169 | CDC42EP3 |
| ENSGALT00000017907 | IRF2BP2  |
| ENSGALT00000008264 | PDP2     |
| ENSGALT00000008793 |          |
| ENSGALT00000007518 |          |
| ENSGALT00000040564 |          |
| ENSGALT00000006563 |          |

|                    |         |
|--------------------|---------|
| ENSGALT0000009554  | AGTR2   |
| ENSGALT00000014023 |         |
| ENSGALT00000014971 | SLITRK2 |
| ENSGALT00000033813 |         |
| ENSGALT00000013983 | GPR1    |
| ENSGALT00000015011 |         |
| ENSGALT00000018926 | TMEM177 |
| ENSGALT00000004272 |         |
| ENSGALT00000011035 | KLHL25  |
| ENSGALT00000011869 | KBTBD13 |
| ENSGALT00000013924 |         |
| ENSGALT00000018475 | SNAPC3  |
| ENSGALT00000029098 |         |
| ENSGALT00000029084 |         |
| ENSGALT00000029081 |         |

**DEGs between CH and WL**

| <b>Ensembl Transcript ID</b> | <b>HGNC symbol</b> |
|------------------------------|--------------------|
| ENSGALT00000029647           |                    |
| ENSGALT00000000407           |                    |
| ENSGALT00000000510           |                    |
| ENSGALT00000040207           |                    |
| ENSGALT00000000555           |                    |
| ENSGALT00000040563           | ANKMY1             |
| ENSGALT00000000587           |                    |
| ENSGALT00000014902           |                    |
| ENSGALT00000001184           | MYH13              |
| ENSGALT00000014829           | DPP7               |
| ENSGALT00000000671           | LONP1              |
| ENSGALT00000014774           | MAN1B1             |
| ENSGALT00000014744           |                    |
| ENSGALT00000000806           | RANBP3             |
| ENSGALT00000001427           |                    |
| ENSGALT00000041277           |                    |
| ENSGALT00000014675           |                    |
| ENSGALT00000014665           | TRAF2              |
| ENSGALT00000014657           |                    |
| ENSGALT00000001029           |                    |
| ENSGALT00000014614           | RABL6              |
| ENSGALT00000001137           | PIP5K1C            |
| ENSGALT00000001477           | MAP2K4             |
| ENSGALT00000001507           |                    |

**DEGs between AA and WL**

| <b>Ensembl Transcript ID</b> | <b>HGNC symbol</b> |
|------------------------------|--------------------|
| ENSGALT00000029647           |                    |
| ENSGALT00000000407           |                    |
| ENSGALT00000040207           |                    |
| ENSGALT00000000555           |                    |
| ENSGALT00000040563           | ANKMY1             |
| ENSGALT00000000556           |                    |
| ENSGALT00000000587           |                    |
| ENSGALT00000001184           | MYH13              |
| ENSGALT00000014829           | DPP7               |
| ENSGALT00000000671           | LONP1              |
| ENSGALT00000014774           | MAN1B1             |
| ENSGALT00000014744           |                    |
| ENSGALT00000000806           | RANBP3             |
| ENSGALT00000000837           | MARCH2             |
| ENSGALT00000000866           |                    |
| ENSGALT00000014712           | NPDC1              |
| ENSGALT00000014675           |                    |
| ENSGALT00000014665           | TRAF2              |
| ENSGALT00000014657           |                    |
| ENSGALT00000001029           |                    |
| ENSGALT00000014614           | RABL6              |
| ENSGALT00000001137           | PIP5K1C            |
| ENSGALT00000001477           | MAP2K4             |
| ENSGALT00000001507           |                    |

|                    |         |                    |             |
|--------------------|---------|--------------------|-------------|
| ENSGALT0000001534  | ELAC2   | ENSGALT0000001534  | ELAC2       |
| ENSGALT00000014440 | ZNF618  | ENSGALT00000014440 | ZNF618      |
| ENSGALT00000002041 |         | ENSGALT00000002041 |             |
| ENSGALT00000002095 |         | ENSGALT00000002095 |             |
| ENSGALT00000002182 | B3GNTL1 | ENSGALT00000014372 | SLC31A1     |
| ENSGALT00000014372 | SLC31A1 | ENSGALT00000002349 |             |
| ENSGALT00000002349 |         | ENSGALT00000028221 |             |
| ENSGALT00000014359 | FKBP15  | ENSGALT00000014359 | FKBP15      |
| ENSGALT00000002374 |         | ENSGALT00000002374 |             |
| ENSGALT00000002396 | FOXK2   | ENSGALT00000002416 |             |
| ENSGALT00000002433 | NARF    | ENSGALT00000002433 | NARF        |
| ENSGALT00000002490 |         | ENSGALT00000002445 | C17orf62    |
| ENSGALT00000014314 |         | ENSGALT00000002469 | OGFOD3      |
| ENSGALT00000002733 | MFSD11  | ENSGALT00000002490 |             |
| ENSGALT00000002759 |         | ENSGALT00000002528 |             |
| ENSGALT00000002784 |         | ENSGALT00000002733 | MFSD11      |
| ENSGALT00000034851 |         | ENSGALT00000002759 |             |
| ENSGALT00000014239 | DPH7    | ENSGALT00000002784 |             |
| ENSGALT00000003062 | UBE2O   | ENSGALT00000002789 | MXRA7       |
| ENSGALT00000002885 | PRPSAP1 | ENSGALT00000034851 |             |
| ENSGALT00000014053 | ANAPC2  | ENSGALT00000014239 | DPH7        |
| ENSGALT00000021823 | CMA1    | ENSGALT00000003062 | UBE2O       |
| ENSGALT00000014039 |         | ENSGALT00000002885 | PRPSAP<br>1 |
| ENSGALT00000021812 |         | ENSGALT00000014053 | ANAPC2      |
| ENSGALT00000003210 |         | ENSGALT00000021823 | CMA1        |
| ENSGALT00000013811 |         | ENSGALT00000014039 |             |
| ENSGALT00000021807 |         | ENSGALT00000021812 |             |
| ENSGALT00000003433 |         | ENSGALT00000003210 |             |
| ENSGALT00000003475 |         | ENSGALT00000013811 |             |
| ENSGALT00000003571 | UNK     | ENSGALT00000003381 |             |
| ENSGALT00000011643 |         | ENSGALT00000021807 |             |
| ENSGALT00000002831 |         | ENSGALT00000003433 |             |
| ENSGALT00000003634 | GALK1   | ENSGALT00000003475 |             |
| ENSGALT00000003804 | SAP30BP | ENSGALT00000003571 | UNK         |
| ENSGALT00000004306 |         | ENSGALT00000011643 |             |
| ENSGALT00000004482 |         | ENSGALT00000002831 |             |
| ENSGALT00000004555 |         | ENSGALT00000003634 | GALK1       |
| ENSGALT00000004579 | NOTUM   | ENSGALT00000003804 | SAP30BP     |
| ENSGALT00000004723 | UTP18   | ENSGALT00000004306 |             |
| ENSGALT00000034713 | TOM1L1  | ENSGALT00000004482 |             |
| ENSGALT00000011421 |         | ENSGALT00000004555 |             |

|                    |            |                    |                |
|--------------------|------------|--------------------|----------------|
| ENSGALT00000011333 |            | ENSGALT00000004579 | NOTUM          |
| ENSGALT00000004865 |            | ENSGALT00000004723 | UTP18          |
| ENSGALT00000004896 | PCTP       | ENSGALT00000011421 |                |
| ENSGALT00000002422 | MLLT1      | ENSGALT00000011292 | CDK5RA<br>P2   |
| ENSGALT00000004998 | COIL       | ENSGALT00000004865 |                |
| ENSGALT00000005054 |            | ENSGALT00000002682 |                |
| ENSGALT00000034695 |            | ENSGALT00000004896 | PCTP           |
| ENSGALT00000005180 | SUZ12      | ENSGALT00000002422 | MLLT1          |
| ENSGALT00000008172 | SLC25A25   | ENSGALT00000004971 | TRIM25         |
| ENSGALT00000005437 | C17orf75   | ENSGALT00000005054 |                |
| ENSGALT00000008132 |            | ENSGALT00000039989 | MEGF9          |
| ENSGALT00000001193 |            | ENSGALT00000034695 |                |
| ENSGALT00000008122 |            | ENSGALT00000005180 | SUZ12          |
| ENSGALT00000008495 | ST6GALNAC6 | ENSGALT00000008172 | SLC25A2<br>5   |
| ENSGALT00000001236 | DOT1L      | ENSGALT00000005437 | C17orf75       |
| ENSGALT00000001472 | AP3D1      | ENSGALT00000008132 |                |
| ENSGALT00000005503 | ERN1       | ENSGALT00000001193 |                |
| ENSGALT00000007990 | CERCAM     | ENSGALT00000008122 |                |
| ENSGALT00000034662 | TEX2       | ENSGALT00000008495 | ST6GAL<br>NAC6 |
| ENSGALT00000007962 | SLC27A4    | ENSGALT00000041212 |                |
| ENSGALT00000006110 | MKNK2      | ENSGALT00000001236 | DOT1L          |
| ENSGALT00000007881 | COQ4       | ENSGALT00000001472 | AP3D1          |
| ENSGALT00000001502 | BTBD2      | ENSGALT00000005503 | ERN1           |
| ENSGALT00000005586 |            | ENSGALT00000007990 | CERCAM         |
| ENSGALT00000005647 | SMURF2     | ENSGALT00000034662 | TEX2           |
| ENSGALT00000005672 |            | ENSGALT00000007962 | SLC27A4        |
| ENSGALT00000001527 | SCAMP4     | ENSGALT00000017003 | MOB3A          |
| ENSGALT00000005785 |            | ENSGALT00000006110 | MKNK2          |
| ENSGALT00000023521 |            | ENSGALT00000007881 | COQ4           |
| ENSGALT00000029695 | ABHD17A    | ENSGALT00000001502 | BTBD2          |
| ENSGALT00000001557 |            | ENSGALT00000005586 |                |
| ENSGALT00000007637 |            | ENSGALT00000005647 | SMURF2         |
| ENSGALT00000007631 | PTGES2     | ENSGALT00000005672 |                |
| ENSGALT00000007603 |            | ENSGALT00000034629 | C17orf58       |
| ENSGALT00000007546 | GLE1       | ENSGALT00000001527 | SCAMP4         |
| ENSGALT00000005813 |            | ENSGALT00000005785 |                |
| ENSGALT00000005864 |            | ENSGALT00000023521 |                |
| ENSGALT00000006197 |            | ENSGALT00000029695 | ABHD17<br>A    |

|                    |          |                    |              |
|--------------------|----------|--------------------|--------------|
| ENSGALT00000006288 |          | ENSGALT00000001557 |              |
| ENSGALT00000001662 | MIER2    | ENSGALT00000007637 |              |
| ENSGALT00000001723 | UBXN6    | ENSGALT00000007631 | PTGES2       |
| ENSGALT00000006617 | SLC16A6  | ENSGALT00000007603 |              |
| ENSGALT00000006701 | WIP11    | ENSGALT00000007546 | GLE1         |
| ENSGALT00000035511 | PLIN3    | ENSGALT00000005813 |              |
| ENSGALT00000001774 | SEMA6B   | ENSGALT00000005864 |              |
| ENSGALT00000006909 |          | ENSGALT00000006197 |              |
| ENSGALT00000006907 | ABCA5    | ENSGALT00000006288 |              |
| ENSGALT00000006971 | MAP2K6   | ENSGALT00000001662 | MIER2        |
| ENSGALT00000001934 |          | ENSGALT00000001723 | UBXN6        |
| ENSGALT00000007063 | ATP5J2   | ENSGALT00000006617 | SLC16A6      |
| ENSGALT00000038499 | CDC42EP4 | ENSGALT00000006701 | WIP11        |
| ENSGALT00000002009 |          | ENSGALT00000035511 | PLIN3        |
| ENSGALT00000029664 |          | ENSGALT00000001774 | SEMA6B       |
| ENSGALT00000002022 |          | ENSGALT00000006907 | ABCA5        |
| ENSGALT00000007431 | ZDHHC12  | ENSGALT00000006971 | MAP2K6       |
| ENSGALT00000007424 | ZER1     | ENSGALT00000001934 |              |
| ENSGALT00000002098 | POLRMT   | ENSGALT00000007063 | ATP5J2       |
| ENSGALT00000002107 | FGF22    | ENSGALT00000038499 | CDC42E<br>P4 |
| ENSGALT00000002126 |          | ENSGALT00000002009 |              |
| ENSGALT00000007398 |          | ENSGALT00000029664 |              |
| ENSGALT00000007292 | NPLOC4   | ENSGALT00000002022 |              |
| ENSGALT00000007279 | LRRC8A   | ENSGALT00000007431 | ZDHHC1<br>2  |
| ENSGALT00000011145 | SLC38A10 | ENSGALT00000007424 | ZER1         |
| ENSGALT00000007386 |          | ENSGALT00000002098 | POLRMT       |
| ENSGALT00000007251 |          | ENSGALT00000002126 |              |
| ENSGALT00000035079 |          | ENSGALT00000007398 |              |
| ENSGALT00000007150 | FAM73B   | ENSGALT00000007292 | NPLOC4       |
| ENSGALT00000011206 | BAIAP2   | ENSGALT00000007326 | CCBL1        |
| ENSGALT00000011238 | RPTOR    | ENSGALT00000007279 | LRRC8A       |
| ENSGALT00000007143 |          | ENSGALT00000011145 | SLC38A1<br>0 |
| ENSGALT00000007108 | CRAT     | ENSGALT00000007386 |              |
| ENSGALT00000003154 | TMEM259  | ENSGALT00000007251 |              |
| ENSGALT00000034684 | TOR1B    | ENSGALT00000011176 | AATK         |
| ENSGALT00000006623 |          | ENSGALT00000035079 |              |
| ENSGALT00000011427 | TBC1D16  | ENSGALT00000007150 | FAM73B       |
| ENSGALT00000011440 |          | ENSGALT00000011238 | RPTOR        |
| ENSGALT00000006585 | USP20    | ENSGALT00000007143 |              |

|                    |          |                    |             |
|--------------------|----------|--------------------|-------------|
| ENSGALT0000006504  | FNBP1    | ENSGALT0000007108  | CRAT        |
| ENSGALT00000040552 |          | ENSGALT0000003154  | TMEM25<br>9 |
| ENSGALT00000032738 |          | ENSGALT00000002579 |             |
| ENSGALT00000006449 |          | ENSGALT00000006623 |             |
| ENSGALT00000006164 |          | ENSGALT00000011427 | TBC1D16     |
| ENSGALT00000008293 |          | ENSGALT00000006585 | USP20       |
| ENSGALT00000035078 |          | ENSGALT00000019296 |             |
| ENSGALT00000004211 | SBNO2    | ENSGALT00000006504 | FNBP1       |
| ENSGALT00000019966 |          | ENSGALT00000040552 |             |
| ENSGALT00000006070 | NUP214   | ENSGALT00000032738 |             |
| ENSGALT00000005350 | SPTB     | ENSGALT00000032737 |             |
| ENSGALT00000011630 |          | ENSGALT00000021548 |             |
| ENSGALT00000000158 | AFMID    | ENSGALT00000006449 |             |
| ENSGALT00000006013 | FAM78A   | ENSGALT00000004080 | POLR2E      |
| ENSGALT00000006004 | PPAPDC3  | ENSGALT00000006164 |             |
| ENSGALT00000005992 | PRRC2B   | ENSGALT00000008293 |             |
| ENSGALT00000011644 |          | ENSGALT00000035078 |             |
| ENSGALT00000011691 | HGS      | ENSGALT00000004211 | SBNO2       |
| ENSGALT00000005921 | UCK1     | ENSGALT00000019966 |             |
| ENSGALT00000035065 |          | ENSGALT00000006070 | NUP214      |
| ENSGALT00000021732 | DAGLA    | ENSGALT00000005350 | SPTB        |
| ENSGALT00000011703 |          | ENSGALT00000011630 |             |
| ENSGALT00000013753 |          | ENSGALT00000006013 | FAM78A      |
| ENSGALT00000011710 |          | ENSGALT00000006004 | PPAPDC<br>3 |
| ENSGALT00000008416 |          | ENSGALT00000005992 | PRRC2B      |
| ENSGALT00000011734 | PCYT2    | ENSGALT00000011644 |             |
| ENSGALT00000021713 | CPSF7    | ENSGALT00000011691 | HGS         |
| ENSGALT00000005588 | DDX31    | ENSGALT00000005921 | UCK1        |
| ENSGALT00000011813 |          | ENSGALT00000005734 |             |
| ENSGALT00000011818 |          | ENSGALT00000032890 | SLC39A3     |
| ENSGALT00000004127 | SLC25A42 | ENSGALT00000035065 |             |
| ENSGALT00000011101 | SPATA20  | ENSGALT00000021732 | DAGLA       |
| ENSGALT00000005537 | TSC1     | ENSGALT00000011703 |             |
| ENSGALT00000038280 | EPN3     | ENSGALT00000013753 |             |
| ENSGALT00000004779 | ARMC6    | ENSGALT00000011710 |             |
| ENSGALT00000004817 | SUGP2    | ENSGALT00000005834 |             |
| ENSGALT00000009269 |          | ENSGALT00000008416 |             |
| ENSGALT00000004856 | HOMER3   | ENSGALT00000011734 | PCYT2       |
| ENSGALT00000008347 | VPS37C   | ENSGALT00000005588 | DDX31       |
| ENSGALT00000031388 | CHAD     | ENSGALT00000011813 |             |



|                    |          |                    |              |
|--------------------|----------|--------------------|--------------|
| ENSGALT0000005397  | RALGDS   | ENSGALT00000011818 |              |
| ENSGALT00000012479 |          | ENSGALT00000004127 | SLC25A4<br>2 |
| ENSGALT00000032736 | MS4A15   | ENSGALT00000038316 |              |
| ENSGALT00000005000 |          | ENSGALT00000011101 | SPATA20      |
| ENSGALT00000005285 |          | ENSGALT00000005537 | TSC1         |
| ENSGALT00000012560 |          | ENSGALT00000038280 | EPN3         |
| ENSGALT00000005085 |          | ENSGALT00000004779 | ARMC6        |
| ENSGALT00000012890 |          | ENSGALT00000004817 | SUGP2        |
| ENSGALT00000005016 | REXO4    | ENSGALT00000009269 |              |
| ENSGALT00000005192 | COMP     | ENSGALT00000004856 | HOMER3       |
| ENSGALT00000005236 | CRTC1    | ENSGALT00000008347 | VPS37C       |
| ENSGALT00000012930 |          | ENSGALT00000031388 | CHAD         |
| ENSGALT00000005309 |          | ENSGALT00000005397 | RALGDS       |
| ENSGALT00000007496 |          | ENSGALT00000012479 |              |
| ENSGALT00000007466 |          | ENSGALT00000032736 | MS4A15       |
| ENSGALT00000005348 | LSM4     | ENSGALT00000004991 |              |
| ENSGALT00000004669 |          | ENSGALT00000005285 |              |
| ENSGALT00000007402 |          | ENSGALT00000012560 |              |
| ENSGALT00000013002 | SLC25A19 | ENSGALT00000012666 | HID1         |
| ENSGALT00000005355 |          | ENSGALT00000005085 |              |
| ENSGALT00000029662 |          | ENSGALT00000005056 |              |
| ENSGALT00000006156 |          | ENSGALT00000012890 |              |
| ENSGALT00000040443 | RPUSD2   | ENSGALT00000005016 | REXO4        |
| ENSGALT00000013018 | KIAA0195 | ENSGALT00000005192 | COMP         |
| ENSGALT00000013031 | CASKIN2  | ENSGALT00000005236 | CRTC1        |
| ENSGALT00000001658 |          | ENSGALT00000012930 |              |
| ENSGALT00000005424 |          | ENSGALT00000012934 |              |
| ENSGALT00000040420 |          | ENSGALT00000008160 |              |
| ENSGALT00000006955 |          | ENSGALT00000004792 | ADAMTS<br>13 |
| ENSGALT00000004255 |          | ENSGALT00000005309 |              |
| ENSGALT00000023312 | RETSAT   | ENSGALT00000005330 |              |
| ENSGALT00000004226 | BRD3     | ENSGALT00000007496 |              |
| ENSGALT00000006852 |          | ENSGALT00000007466 |              |
| ENSGALT00000005581 | ARRDC2   | ENSGALT00000005348 | LSM4         |
| ENSGALT00000004139 | RXRA     | ENSGALT00000004669 |              |
| ENSGALT00000005655 |          | ENSGALT00000007402 |              |
| ENSGALT00000039021 | AGPAT2   | ENSGALT00000013002 | SLC25A1<br>9 |
| ENSGALT00000006685 |          | ENSGALT00000005355 |              |
| ENSGALT00000006531 |          | ENSGALT00000029662 |              |

|                    |         |                    |          |
|--------------------|---------|--------------------|----------|
| ENSGALT0000005938  | CPAMD8  | ENSGALT0000006156  |          |
| ENSGALT0000006436  |         | ENSGALT00000040443 | RPUSD2   |
| ENSGALT0000005982  | SIN3B   | ENSGALT00000013018 | KIAA0195 |
| ENSGALT00000040276 | NAV2    | ENSGALT00000013031 | CASKIN2  |
| ENSGALT0000006317  |         | ENSGALT00000004499 | SARDH    |
| ENSGALT00000003726 | SEC16A  | ENSGALT00000001658 |          |
| ENSGALT00000005994 |         | ENSGALT00000005424 |          |
| ENSGALT00000006018 | SLC35E1 | ENSGALT00000006955 |          |
| ENSGALT00000006060 |         | ENSGALT00000004255 |          |
| ENSGALT00000003045 | INPP5E  | ENSGALT00000023312 | RETSAT   |
| ENSGALT00000003018 |         | ENSGALT00000006901 | IGHMBP2  |
| ENSGALT00000006230 | EPS15L1 | ENSGALT00000004226 | BRD3     |
| ENSGALT00000019904 | LGR4    | ENSGALT00000006852 |          |
| ENSGALT00000019825 |         | ENSGALT00000004139 | RXRA     |
| ENSGALT00000031814 |         | ENSGALT00000005655 |          |
| ENSGALT00000019813 | ELP4    | ENSGALT00000040352 | PSMD13   |
| ENSGALT00000002770 | GP5M1   | ENSGALT00000003844 | FAM69B   |
| ENSGALT00000040104 | RCN1    | ENSGALT00000039021 | AGPAT2   |
| ENSGALT00000034856 | QSOX2   | ENSGALT00000006685 |          |
| ENSGALT00000006310 |         | ENSGALT00000006633 |          |
| ENSGALT00000002629 |         | ENSGALT00000006531 |          |
| ENSGALT00000002593 | CAMSAP1 | ENSGALT00000005938 | CPAMD8   |
| ENSGALT00000039281 | TPM4    | ENSGALT00000005982 | SIN3B    |
| ENSGALT00000019117 |         | ENSGALT00000040276 | NAV2     |
| ENSGALT00000008620 |         | ENSGALT00000006317 |          |
| ENSGALT00000020812 |         | ENSGALT00000003726 | SEC16A   |
| ENSGALT00000008698 |         | ENSGALT00000005994 |          |
| ENSGALT00000008731 | PARVA   | ENSGALT00000006018 | SLC35E1  |
| ENSGALT00000008888 | MICAL2  | ENSGALT00000006060 |          |
| ENSGALT00000006684 | DPP9    | ENSGALT00000003045 | INPP5E   |
| ENSGALT00000008904 |         | ENSGALT00000003018 |          |
| ENSGALT00000008932 |         | ENSGALT00000006230 | EPS15L1  |
| ENSGALT00000039859 |         | ENSGALT00000019904 | LGR4     |
| ENSGALT00000006779 |         | ENSGALT00000019825 |          |
| ENSGALT00000006783 |         | ENSGALT00000031814 |          |
| ENSGALT00000009054 |         | ENSGALT00000019813 | ELP4     |
| ENSGALT00000009084 |         | ENSGALT00000002770 | GP5M1    |
| ENSGALT00000009088 | ADM     | ENSGALT00000040104 | RCN1     |
| ENSGALT00000002299 | CNTRL   | ENSGALT00000034856 | QSOX2    |
| ENSGALT00000009266 |         | ENSGALT00000006310 |          |
| ENSGALT00000009326 | IPO7    | ENSGALT00000002629 |          |
| ENSGALT00000009336 |         | ENSGALT00000002593 | CAMSAP   |

|                    |          |                    |              |
|--------------------|----------|--------------------|--------------|
| ENSGALT0000002236  |          | ENSGALT00000039281 | TPM4         |
| ENSGALT00000009504 |          | ENSGALT00000019109 |              |
| ENSGALT00000034894 | STOM     | ENSGALT00000006575 |              |
| ENSGALT00000002162 | DAB2IP   | ENSGALT00000008620 |              |
| ENSGALT00000009626 | TUB      | ENSGALT00000020812 |              |
| ENSGALT00000009649 |          | ENSGALT00000008698 |              |
| ENSGALT00000034898 |          | ENSGALT00000008731 | PARVA        |
| ENSGALT00000001902 | RC3H2    | ENSGALT00000008888 | MICAL2       |
| ENSGALT00000009835 |          | ENSGALT00000006684 | DPP9         |
| ENSGALT00000001877 |          | ENSGALT00000008904 |              |
| ENSGALT00000001117 | PLA2G15  | ENSGALT00000039859 |              |
| ENSGALT00000001165 | SLC7A6OS | ENSGALT00000006779 |              |
| ENSGALT00000001259 | SLC7A6   | ENSGALT00000006783 |              |
| ENSGALT00000001294 | GINS3    | ENSGALT00000003081 | MED16        |
| ENSGALT00000032718 | KCNJ11   | ENSGALT00000009037 | MRVI1        |
| ENSGALT00000001304 |          | ENSGALT00000009054 |              |
| ENSGALT00000001320 |          | ENSGALT00000009084 |              |
| ENSGALT00000001489 | MMP15    | ENSGALT00000009088 | ADM          |
| ENSGALT00000001326 | USB1     | ENSGALT00000002299 | CNTRL        |
| ENSGALT00000001687 |          | ENSGALT00000009266 |              |
| ENSGALT00000010128 | HPS5     | ENSGALT00000009326 | IPO7         |
| ENSGALT00000001535 | SCAI     | ENSGALT00000009336 |              |
| ENSGALT00000001768 | POLR2C   | ENSGALT00000002236 |              |
| ENSGALT00000001476 |          | ENSGALT00000009504 |              |
| ENSGALT00000010207 |          | ENSGALT00000034894 | STOM         |
| ENSGALT00000010272 |          | ENSGALT00000002162 | DAB2IP       |
| ENSGALT00000001436 |          | ENSGALT00000009626 | TUB          |
| ENSGALT00000001402 |          | ENSGALT00000009649 |              |
| ENSGALT00000001372 | ZBTB43   | ENSGALT00000034898 |              |
| ENSGALT00000001330 | RALGPS1  | ENSGALT00000001902 | RC3H2        |
| ENSGALT00000001810 |          | ENSGALT00000009835 |              |
| ENSGALT00000010333 | OSBPL5   | ENSGALT00000001877 |              |
| ENSGALT00000010405 |          | ENSGALT00000001117 | PLA2G15      |
| ENSGALT00000001852 | HERPUD1  | ENSGALT00000001165 | SLC7A6O<br>S |
| ENSGALT00000001362 |          | ENSGALT00000001294 | GINS3        |
| ENSGALT00000001871 |          | ENSGALT00000032718 | KCNJ11       |
| ENSGALT00000001908 | NLRC5    | ENSGALT00000001304 |              |
| ENSGALT00000002065 | RSPRY1   | ENSGALT00000001320 |              |
| ENSGALT00000002191 | RANBP10  | ENSGALT00000001489 | MMP15        |
| ENSGALT00000002429 |          | ENSGALT00000001326 | USB1         |

|                    |          |                    |             |
|--------------------|----------|--------------------|-------------|
| ENSGALT0000002498  | EDC4     | ENSGALT0000001687  |             |
| ENSGALT0000002514  |          | ENSGALT00000010128 | HPS5        |
| ENSGALT00000010619 |          | ENSGALT00000001514 | GOLGA1      |
| ENSGALT00000010620 |          | ENSGALT00000001768 | POLR2C      |
| ENSGALT00000039194 | C11orf89 | ENSGALT00000001496 | ARPC5L      |
| ENSGALT00000010641 |          | ENSGALT00000001476 |             |
| ENSGALT00000010676 |          | ENSGALT00000010207 |             |
| ENSGALT00000010751 | DUSP8    | ENSGALT00000010251 |             |
| ENSGALT00000010774 | MOB2     | ENSGALT00000010272 |             |
| ENSGALT00000010823 |          | ENSGALT00000001436 |             |
| ENSGALT00000003047 |          | ENSGALT00000001402 |             |
| ENSGALT00000010998 | AP2A2    | ENSGALT00000001372 | ZBTB43      |
| ENSGALT00000040176 | PLEKHG4  | ENSGALT00000038660 |             |
| ENSGALT00000003500 |          | ENSGALT00000001810 |             |
| ENSGALT00000003653 |          | ENSGALT00000010333 | OSBPL5      |
| ENSGALT00000011039 |          | ENSGALT00000010376 |             |
| ENSGALT00000011062 | TSPAN4   | ENSGALT00000010405 |             |
| ENSGALT00000039051 |          | ENSGALT00000001852 | HERPUD<br>1 |
| ENSGALT00000003894 | MTSS1L   | ENSGALT00000001362 |             |
| ENSGALT00000032690 | EFCAB4A  | ENSGALT00000010554 |             |
| ENSGALT00000023495 |          | ENSGALT00000002065 | RSPRY1      |
| ENSGALT00000003987 |          | ENSGALT00000002191 | RANBP1<br>0 |
| ENSGALT00000004241 | PDPR     | ENSGALT00000002429 |             |
| ENSGALT00000011181 |          | ENSGALT00000002498 | EDC4        |
| ENSGALT00000022893 | SUV420H1 | ENSGALT00000002514 |             |
| ENSGALT00000032683 |          | ENSGALT00000010619 |             |
| ENSGALT00000011466 |          | ENSGALT00000039194 | C11orf89    |
| ENSGALT00000011547 |          | ENSGALT00000010641 |             |
| ENSGALT00000011621 |          | ENSGALT00000010676 |             |
| ENSGALT00000004497 |          | ENSGALT00000010774 | MOB2        |
| ENSGALT00000011657 |          | ENSGALT00000010823 |             |
| ENSGALT00000004515 |          | ENSGALT00000003047 |             |
| ENSGALT00000017615 | DTX4     | ENSGALT00000010998 | AP2A2       |
| ENSGALT00000011857 |          | ENSGALT00000003282 | TPPP3       |
| ENSGALT00000022891 | FCGBP    | ENSGALT00000040176 | PLEKHG<br>4 |
| ENSGALT00000011921 |          | ENSGALT00000003500 |             |
| ENSGALT00000007737 | TIMM10   | ENSGALT00000003653 |             |
| ENSGALT00000038761 | RTN4RL2  | ENSGALT00000039051 |             |
| ENSGALT00000004875 |          | ENSGALT00000003894 | MTSS1L      |

|                    |         |                    |              |
|--------------------|---------|--------------------|--------------|
| ENSGALT00000012340 | FADD    | ENSGALT00000032690 | EFCAB4<br>A  |
| ENSGALT00000004906 | AMFR    | ENSGALT00000023495 |              |
| ENSGALT00000005216 | MBTPS1  | ENSGALT00000003987 |              |
| ENSGALT00000012655 |         | ENSGALT00000004100 |              |
| ENSGALT00000010684 | FBXO3   | ENSGALT00000004241 | PDPR         |
| ENSGALT00000005262 | OSGIN1  | ENSGALT00000011181 |              |
| ENSGALT00000005367 | NFATC3  | ENSGALT00000022893 | SUV420H<br>1 |
| ENSGALT00000022035 |         | ENSGALT00000032683 |              |
| ENSGALT00000005597 | SLC12A4 | ENSGALT00000011547 |              |
| ENSGALT00000012705 |         | ENSGALT00000011621 |              |
| ENSGALT00000012746 |         | ENSGALT00000004497 |              |
| ENSGALT00000012805 | PAMR1   | ENSGALT00000011657 |              |
| ENSGALT00000012829 | COMMD9  | ENSGALT00000017615 | DTX4         |
| ENSGALT00000012888 | TRAF6   | ENSGALT00000011857 |              |
| ENSGALT00000005666 |         | ENSGALT00000022891 | FCGBP        |
| ENSGALT00000005731 |         | ENSGALT00000011921 |              |
| ENSGALT00000021154 |         | ENSGALT00000007737 | TIMM10       |
| ENSGALT00000016123 | CYLD    | ENSGALT00000038761 | RTN4RL2      |
| ENSGALT00000013052 |         | ENSGALT00000004875 |              |
| ENSGALT00000022785 |         | ENSGALT00000012208 | TPCN2        |
| ENSGALT00000030003 |         | ENSGALT00000012340 | FADD         |
| ENSGALT00000013121 |         | ENSGALT00000004906 | AMFR         |
| ENSGALT00000034245 |         | ENSGALT00000005064 | TRADD        |
| ENSGALT00000006188 | ZNF423  | ENSGALT00000005070 |              |
| ENSGALT00000013128 |         | ENSGALT00000005176 |              |
| ENSGALT00000006236 | SIAH1   | ENSGALT00000005216 | MBTPS1       |
| ENSGALT00000006283 |         | ENSGALT00000012655 |              |
| ENSGALT00000006378 |         | ENSGALT00000010684 | FBXO3        |
| ENSGALT00000013183 |         | ENSGALT00000005262 | OSGIN1       |
| ENSGALT00000013191 |         | ENSGALT00000005367 | NFATC3       |
| ENSGALT00000013356 |         | ENSGALT00000022035 |              |
| ENSGALT00000006871 | MYLK3   | ENSGALT00000005388 | DUS2         |
| ENSGALT00000013368 |         | ENSGALT00000005597 | SLC12A4      |
| ENSGALT00000013396 |         | ENSGALT00000023364 | CAT          |
| ENSGALT00000013425 |         | ENSGALT00000012705 |              |
| ENSGALT00000006976 |         | ENSGALT00000012805 | PAMR1        |
| ENSGALT00000007136 |         | ENSGALT00000012829 | COMMD9       |
| ENSGALT00000007149 |         | ENSGALT00000012861 | PRR5L        |
| ENSGALT00000007159 |         | ENSGALT00000012888 | TRAF6        |
| ENSGALT00000013551 |         | ENSGALT00000012953 |              |

|                    |          |                    |             |
|--------------------|----------|--------------------|-------------|
| ENSGALT00000013587 | ATG13    | ENSGALT00000005666 |             |
| ENSGALT00000035181 | PFKFB1   | ENSGALT00000005731 |             |
| ENSGALT00000007751 | LRP3     | ENSGALT00000005902 | CHD9        |
| ENSGALT00000007771 |          | ENSGALT00000016123 | CYLD        |
| ENSGALT00000013748 |          | ENSGALT00000013011 | EXT2        |
| ENSGALT00000038342 |          | ENSGALT00000013052 |             |
| ENSGALT00000013841 |          | ENSGALT00000022785 |             |
| ENSGALT00000013867 | DLL4     | ENSGALT00000030003 |             |
| ENSGALT00000013933 |          | ENSGALT00000006125 | PAPD5       |
| ENSGALT00000013981 | NDUFAF1  | ENSGALT00000013121 |             |
| ENSGALT00000007911 | SS18L2   | ENSGALT00000034245 |             |
| ENSGALT00000007938 | KIAA0355 | ENSGALT00000006188 | ZNF423      |
| ENSGALT00000014000 |          | ENSGALT00000013128 |             |
| ENSGALT00000014145 | MAPKBP1  | ENSGALT00000006283 |             |
| ENSGALT00000008241 | FAM96B   | ENSGALT00000013143 |             |
| ENSGALT00000008251 |          | ENSGALT00000006378 |             |
| ENSGALT00000014555 | EHD4     | ENSGALT00000013183 |             |
| ENSGALT00000014672 | TMEM87A  | ENSGALT00000013356 |             |
| ENSGALT00000039221 |          | ENSGALT00000006871 | MYLK3       |
| ENSGALT00000008447 |          | ENSGALT00000013368 |             |
| ENSGALT00000008452 |          | ENSGALT00000006929 |             |
| ENSGALT00000008465 |          | ENSGALT00000013425 |             |
| ENSGALT00000014708 |          | ENSGALT00000006976 |             |
| ENSGALT00000014809 |          | ENSGALT00000007136 |             |
| ENSGALT00000015071 | TMEM62   | ENSGALT00000007149 |             |
| ENSGALT00000015102 | ELMSAN1  | ENSGALT00000007159 |             |
| ENSGALT00000038149 |          | ENSGALT00000013551 |             |
| ENSGALT00000015117 |          | ENSGALT00000013587 | ATG13       |
| ENSGALT00000033808 |          | ENSGALT00000013673 | CREB3L1     |
| ENSGALT00000015198 |          | ENSGALT00000035181 | PFKFB1      |
| ENSGALT00000029669 | HOXC10   | ENSGALT00000007751 | LRP3        |
| ENSGALT00000021972 | ATMIN    | ENSGALT00000007771 |             |
| ENSGALT00000015206 |          | ENSGALT00000013748 |             |
| ENSGALT00000015283 |          | ENSGALT00000007832 |             |
| ENSGALT00000000388 | PCNX     | ENSGALT00000013841 |             |
| ENSGALT00000022454 |          | ENSGALT00000013867 | DLL4        |
| ENSGALT00000015296 |          | ENSGALT00000013933 |             |
| ENSGALT00000015312 |          | ENSGALT00000032642 |             |
| ENSGALT00000015350 | KIAA0247 | ENSGALT00000013978 |             |
| ENSGALT00000015368 |          | ENSGALT00000013981 | NDUFAF<br>1 |
| ENSGALT00000008821 |          | ENSGALT00000007938 | KIAA0355    |

|                    |         |                    |             |
|--------------------|---------|--------------------|-------------|
| ENSGALT00000015588 |         | ENSGALT00000034006 |             |
| ENSGALT00000033760 |         | ENSGALT00000014000 |             |
| ENSGALT00000008832 |         | ENSGALT00000014067 |             |
| ENSGALT00000021647 | LOXL3   | ENSGALT00000014145 | MAPKBP<br>1 |
| ENSGALT00000023454 |         | ENSGALT00000008241 | FAM96B      |
| ENSGALT00000015678 |         | ENSGALT00000008251 |             |
| ENSGALT00000015691 | EMC7    | ENSGALT00000014555 | EHD4        |
| ENSGALT00000015856 | FAM98B  | ENSGALT00000014672 | TMEM87<br>A |
| ENSGALT00000015940 |         | ENSGALT00000039221 |             |
| ENSGALT00000016005 |         | ENSGALT00000008447 |             |
| ENSGALT00000028346 |         | ENSGALT00000008459 |             |
| ENSGALT00000009065 | KLHL36  | ENSGALT00000008465 |             |
| ENSGALT00000009174 | ZDHHC7  | ENSGALT00000014708 |             |
| ENSGALT00000009186 | MTHFSD  | ENSGALT00000039170 |             |
| ENSGALT00000009243 |         | ENSGALT00000014809 |             |
| ENSGALT00000009240 |         | ENSGALT00000032634 |             |
| ENSGALT00000009231 |         | ENSGALT00000014837 |             |
| ENSGALT00000016236 | ARHGAP5 | ENSGALT00000015071 | TMEM62      |
| ENSGALT00000016285 |         | ENSGALT00000015102 | ELMSAN<br>1 |
| ENSGALT00000016289 | BAZ1A   | ENSGALT00000038149 |             |
| ENSGALT00000016327 | SRP54   | ENSGALT00000015117 |             |
| ENSGALT00000009283 |         | ENSGALT00000015198 |             |
| ENSGALT00000016326 |         | ENSGALT00000029669 | HOXC10      |
| ENSGALT00000016334 | PPP2R3C | ENSGALT00000021972 | ATMIN       |
| ENSGALT00000016344 |         | ENSGALT00000015206 |             |
| ENSGALT00000009408 |         | ENSGALT00000015283 |             |
| ENSGALT00000009439 |         | ENSGALT0000000388  | PCNX        |
| ENSGALT00000016500 | SEC23A  | ENSGALT00000022454 |             |
| ENSGALT00000016505 |         | ENSGALT00000015312 |             |
| ENSGALT00000016512 |         | ENSGALT00000015350 | KIAA0247    |
| ENSGALT00000016532 | PNN     | ENSGALT00000015368 |             |
| ENSGALT00000016569 | FBXO33  | ENSGALT00000028069 |             |
| ENSGALT00000016576 | COQ6    | ENSGALT00000015383 | GALNT16     |
| ENSGALT00000016585 |         | ENSGALT00000008756 | SDR42E1     |
| ENSGALT00000016604 | ALDH6A1 | ENSGALT00000008821 |             |
| ENSGALT00000032565 |         | ENSGALT00000015588 |             |
| ENSGALT00000022441 | TOMM40L | ENSGALT00000033760 |             |
| ENSGALT00000016641 |         | ENSGALT00000008832 |             |
| ENSGALT00000016690 | LTBP2   | ENSGALT00000021647 | LOXL3       |

|                    |           |                    |             |
|--------------------|-----------|--------------------|-------------|
| ENSGALT00000010149 | GALNS     | ENSGALT00000000596 | AP2S1       |
| ENSGALT00000016704 | AREL1     | ENSGALT00000015631 |             |
| ENSGALT00000010048 | ACSF3     | ENSGALT00000015663 | EIF2AK4     |
| ENSGALT00000010046 | ANKRD11   | ENSGALT00000015691 | EMC7        |
| ENSGALT00000016756 |           | ENSGALT00000015856 | FAM98B      |
| ENSGALT00000016763 | MLH3      | ENSGALT00000015940 |             |
| ENSGALT00000016792 | NEK9      | ENSGALT00000015948 |             |
| ENSGALT00000037707 |           | ENSGALT00000015965 | ZNF770      |
| ENSGALT00000016850 | GPATCH2L  | ENSGALT00000016005 |             |
| ENSGALT00000016888 | ESRRB     | ENSGALT00000016127 |             |
| ENSGALT00000016892 | VASH1     | ENSGALT00000028346 |             |
| ENSGALT00000016899 |           | ENSGALT00000016210 | HEATR5<br>A |
| ENSGALT00000016918 | IRF2BPL   | ENSGALT00000009174 | ZDHHC7      |
| ENSGALT00000016923 |           | ENSGALT00000009186 | MTHFSD      |
| ENSGALT00000017033 | AHSA1     | ENSGALT00000009243 |             |
| ENSGALT00000000074 |           | ENSGALT00000009240 |             |
| ENSGALT00000017069 |           | ENSGALT00000009231 |             |
| ENSGALT00000034401 |           | ENSGALT00000009226 | EMC8        |
| ENSGALT00000000910 | CIRH1A    | ENSGALT00000016236 | ARHGAP<br>5 |
| ENSGALT00000004641 |           | ENSGALT00000016285 |             |
| ENSGALT00000004784 | MKL2      | ENSGALT00000016289 | BAZ1A       |
| ENSGALT00000017215 | STON2     | ENSGALT00000016327 | SRP54       |
| ENSGALT00000017221 | SEL1L     | ENSGALT00000009283 |             |
| ENSGALT00000004911 | BFAR      | ENSGALT00000016326 |             |
| ENSGALT00000000947 |           | ENSGALT00000016334 | PPP2R3<br>C |
| ENSGALT00000004992 | TXNDC11   | ENSGALT00000016344 |             |
| ENSGALT00000017348 | TTC8      | ENSGALT00000016353 |             |
| ENSGALT00000005338 |           | ENSGALT00000009408 |             |
| ENSGALT00000017411 | C14orf159 | ENSGALT00000009439 |             |
| ENSGALT00000017485 |           | ENSGALT00000016500 | SEC23A      |
| ENSGALT00000017502 | TRIP11    | ENSGALT00000016505 |             |
| ENSGALT00000037601 |           | ENSGALT00000016512 |             |
| ENSGALT00000005479 |           | ENSGALT00000016532 | PNN         |
| ENSGALT00000017577 | LGMN      | ENSGALT00000016569 | FBXO33      |
| ENSGALT00000005507 | LMTK2     | ENSGALT00000010154 | PIEZO1      |
| ENSGALT00000005546 | TECPR1    | ENSGALT00000016576 | COQ6        |
| ENSGALT00000001181 | IST1      | ENSGALT00000016585 |             |
| ENSGALT00000001245 |           | ENSGALT00000022384 | CDT1        |
| ENSGALT00000001289 | PHLPP2    | ENSGALT00000016604 | ALDH6A1     |



|                    |          |                    |               |
|--------------------|----------|--------------------|---------------|
| ENSGALT00000028074 |          | ENSGALT00000032565 |               |
| ENSGALT00000017630 | BTBD7    | ENSGALT00000022441 | TOMM40<br>L   |
| ENSGALT00000001325 |          | ENSGALT00000016690 | LTBP2         |
| ENSGALT00000018063 | ATG2B    | ENSGALT00000010149 | GALNS         |
| ENSGALT00000037556 |          | ENSGALT00000016704 | AREL1         |
| ENSGALT00000005765 | FAM20C   | ENSGALT00000016710 | FCF1          |
| ENSGALT00000005824 | PRKAR1B  | ENSGALT00000010046 | ANKRD1<br>1   |
| ENSGALT00000018196 |          | ENSGALT00000016756 |               |
| ENSGALT00000005837 | HEATR2   | ENSGALT00000016763 | MLH3          |
| ENSGALT00000018280 |          | ENSGALT00000016792 | NEK9          |
| ENSGALT00000018296 | SLC25A29 | ENSGALT00000016804 | BATF          |
| ENSGALT00000006001 | SUN1     | ENSGALT00000037707 |               |
| ENSGALT00000018316 | WARS     | ENSGALT00000016850 | GPATCH<br>2L  |
| ENSGALT00000018342 |          | ENSGALT00000016888 | ESRRB         |
| ENSGALT00000034244 | ADAP1    | ENSGALT00000016892 | VASH1         |
| ENSGALT00000034197 | C7orf50  | ENSGALT00000016899 |               |
| ENSGALT00000006456 |          | ENSGALT00000016918 | IRF2BPL       |
| ENSGALT00000006473 | MICALL2  | ENSGALT00000016923 |               |
| ENSGALT00000006529 | INTS1    | ENSGALT00000016945 | TMEM63<br>C   |
| ENSGALT00000018521 | HSP90AA1 | ENSGALT00000016973 | POMT2         |
| ENSGALT00000018539 | WDR20    | ENSGALT00000016986 |               |
| ENSGALT00000018544 | ZNF839   | ENSGALT00000017033 | AHSA1         |
| ENSGALT00000018551 |          | ENSGALT00000000074 |               |
| ENSGALT00000018553 | TECPR2   | ENSGALT00000017069 |               |
| ENSGALT00000018558 | ANKRD9   | ENSGALT00000034401 |               |
| ENSGALT00000018569 | RCOR1    | ENSGALT00000000898 |               |
| ENSGALT00000006646 | GAA      | ENSGALT00000000910 | CIRH1A        |
| ENSGALT00000006656 |          | ENSGALT00000004641 |               |
| ENSGALT00000023325 | EVI5L    | ENSGALT00000017215 | STON2         |
| ENSGALT00000032501 |          | ENSGALT00000017221 | SEL1L         |
| ENSGALT00000006743 |          | ENSGALT00000004911 | BFAR          |
| ENSGALT00000040967 |          | ENSGALT00000000947 |               |
| ENSGALT00000006768 | SNX8     | ENSGALT00000004992 | TXNDC1<br>1   |
| ENSGALT00000018666 | TNFAIP2  | ENSGALT00000017359 | TDP1          |
| ENSGALT00000018671 |          | ENSGALT00000005338 |               |
| ENSGALT00000018692 |          | ENSGALT00000017411 | C14orf15<br>9 |

|                    |          |                    |              |
|--------------------|----------|--------------------|--------------|
| ENSGALT00000018759 | MARK3    | ENSGALT00000017485 |              |
| ENSGALT00000006809 |          | ENSGALT00000017502 | TRIP11       |
| ENSGALT00000006863 | TTYH3    | ENSGALT00000037601 |              |
| ENSGALT00000018795 | APOPT1   | ENSGALT00000005479 |              |
| ENSGALT00000018805 |          | ENSGALT00000017577 | LGMN         |
| ENSGALT00000018983 | ADSSL1   | ENSGALT00000005546 | TECPR1       |
| ENSGALT00000006969 | GNA12    | ENSGALT00000001181 | IST1         |
| ENSGALT00000037448 |          | ENSGALT00000001245 |              |
| ENSGALT00000037443 |          | ENSGALT00000001289 | PHLPP2       |
| ENSGALT00000023630 | NR2F6    | ENSGALT00000028074 |              |
| ENSGALT00000019108 |          | ENSGALT00000017630 | BTBD7        |
| ENSGALT00000037436 |          | ENSGALT00000001325 |              |
| ENSGALT00000019114 |          | ENSGALT00000018063 | ATG2B        |
| ENSGALT00000019132 | BRF1     | ENSGALT00000018066 |              |
| ENSGALT00000019138 | BTBD6    | ENSGALT00000001342 |              |
| ENSGALT00000007098 | FOXK1    | ENSGALT00000037556 |              |
| ENSGALT00000019340 |          | ENSGALT00000005765 | FAM20C       |
| ENSGALT00000019364 |          | ENSGALT00000005824 | PRKAR1<br>B  |
| ENSGALT00000007215 | MMD2     | ENSGALT00000018181 | HHIPL1       |
| ENSGALT00000007252 |          | ENSGALT00000018196 |              |
| ENSGALT00000019409 | SLC38A6  | ENSGALT00000005837 | HEATR2       |
| ENSGALT00000008230 | IVNS1ABP | ENSGALT00000018280 |              |
| ENSGALT00000007259 |          | ENSGALT00000006001 | SUN1         |
| ENSGALT00000019443 | PPM1A    | ENSGALT00000018316 | WARS         |
| ENSGALT00000019451 | PCNXL4   | ENSGALT00000018342 |              |
| ENSGALT00000015673 |          | ENSGALT00000034197 | C7orf50      |
| ENSGALT00000019598 |          | ENSGALT00000006456 |              |
| ENSGALT00000007374 |          | ENSGALT00000004936 | ZFAND2<br>A  |
| ENSGALT00000037347 |          | ENSGALT00000006473 | MICALL2      |
| ENSGALT00000007417 | SMURF1   | ENSGALT00000006529 | INTS1        |
| ENSGALT00000000238 |          | ENSGALT00000018521 | HSP90AA<br>1 |
| ENSGALT00000019620 |          | ENSGALT00000018551 |              |
| ENSGALT00000019657 |          | ENSGALT00000018553 | TECPR2       |
| ENSGALT00000000139 |          | ENSGALT00000018569 | RCOR1        |
| ENSGALT00000019761 | NAA30    | ENSGALT00000006646 | GAA          |
| ENSGALT00000007484 | PDAP1    | ENSGALT00000006656 |              |
| ENSGALT00000019771 |          | ENSGALT00000023325 | EVI5L        |
| ENSGALT00000007493 | BUD31    | ENSGALT00000032501 |              |
| ENSGALT00000019886 |          | ENSGALT00000006743 |              |

|                    |          |                    |             |
|--------------------|----------|--------------------|-------------|
| ENSGALT00000019926 | SAMD4A   | ENSGALT00000040967 |             |
| ENSGALT00000019930 | CGRRF1   | ENSGALT00000006768 | SNX8        |
| ENSGALT00000007505 |          | ENSGALT00000018666 | TNFAIP2     |
| ENSGALT00000019945 |          | ENSGALT00000018671 |             |
| ENSGALT00000007510 |          | ENSGALT00000018692 |             |
| ENSGALT00000019972 |          | ENSGALT00000018759 | MARK3       |
| ENSGALT00000007592 | DHRS7B   | ENSGALT00000006809 |             |
| ENSGALT00000020029 |          | ENSGALT00000006863 | TTYH3       |
| ENSGALT00000007656 | MPRIP    | ENSGALT00000018785 | TRMT61<br>A |
| ENSGALT00000020041 | VCPKMT   | ENSGALT00000018795 | APOPT1      |
| ENSGALT00000020050 | SOS2     | ENSGALT00000032496 |             |
| ENSGALT00000020072 | L2HGDH   | ENSGALT00000018983 | ADSSL1      |
| ENSGALT00000020080 |          | ENSGALT00000006938 | BRAT1       |
| ENSGALT00000020133 | MAP4K5   | ENSGALT00000006969 | GNA12       |
| ENSGALT00000007690 |          | ENSGALT00000037448 |             |
| ENSGALT00000007721 |          | ENSGALT00000037443 |             |
| ENSGALT00000007729 | NT5M     | ENSGALT00000037442 | ZBTB42      |
| ENSGALT00000007745 |          | ENSGALT00000023630 | NR2F6       |
| ENSGALT00000007783 |          | ENSGALT00000019108 |             |
| ENSGALT00000020162 | ATL1     | ENSGALT00000037436 |             |
| ENSGALT00000007838 |          | ENSGALT00000019114 |             |
| ENSGALT00000000234 |          | ENSGALT00000019132 | BRF1        |
| ENSGALT00000020164 | SAV1     | ENSGALT00000019138 | BTBD6       |
| ENSGALT00000007886 | GID4     | ENSGALT00000019249 |             |
| ENSGALT00000020205 | FRMD6    | ENSGALT00000007098 | FOXK1       |
| ENSGALT00000007980 | ALKBH5   | ENSGALT00000019277 | SYNE2       |
| ENSGALT00000020241 | NID2     | ENSGALT00000019302 |             |
| ENSGALT00000020294 | GNPNAT1  | ENSGALT00000019340 |             |
| ENSGALT00000020309 | FERMT2   | ENSGALT00000019364 |             |
| ENSGALT00000020354 | MIS18BP1 | ENSGALT00000007215 | MMD2        |
| ENSGALT00000008014 | MIEF2    | ENSGALT00000007252 |             |
| ENSGALT00000020376 | PRPF39   | ENSGALT00000019409 | SLC38A6     |
| ENSGALT00000020402 | KLHL28   | ENSGALT00000019427 | TRMT5       |
| ENSGALT00000040656 | SMCR8    | ENSGALT00000007259 |             |
| ENSGALT00000008093 | SHMT1    | ENSGALT00000019443 | PPM1A       |
| ENSGALT00000000084 |          | ENSGALT00000019449 | DHRS7       |
| ENSGALT00000000149 |          | ENSGALT00000015673 |             |
| ENSGALT00000008119 |          | ENSGALT00000034001 |             |
| ENSGALT00000019575 |          | ENSGALT00000019598 |             |
| ENSGALT00000031517 |          | ENSGALT00000007374 |             |
| ENSGALT00000003794 |          | ENSGALT00000037347 |             |

|                    |          |                    |        |
|--------------------|----------|--------------------|--------|
| ENSGALT00000031518 |          | ENSGALT00000007417 | SMURF1 |
| ENSGALT00000008174 | B9D1     | ENSGALT00000000238 |        |
| ENSGALT00000000081 |          | ENSGALT00000019620 |        |
| ENSGALT00000041141 |          | ENSGALT00000019657 |        |
| ENSGALT00000008468 | LMF1     | ENSGALT00000000139 |        |
| ENSGALT00000040739 | LAS1L    | ENSGALT00000019761 | NAA30  |
| ENSGALT00000008614 |          | ENSGALT00000007484 | PDAP1  |
| ENSGALT00000032414 | VSIG4    | ENSGALT00000019771 |        |
| ENSGALT00000008671 |          | ENSGALT00000007493 | BUD31  |
| ENSGALT00000007320 |          | ENSGALT00000019842 | ATG14  |
| ENSGALT00000008694 |          | ENSGALT00000019869 | DLGAP5 |
| ENSGALT00000007313 |          | ENSGALT00000019886 |        |
| ENSGALT00000007301 | OPHN1    | ENSGALT00000019926 | SAMD4A |
| ENSGALT00000008758 |          | ENSGALT00000019930 | CGRRF1 |
| ENSGALT00000007294 | YIPF6    | ENSGALT00000007505 |        |
| ENSGALT00000008816 |          | ENSGALT00000019945 |        |
| ENSGALT00000007282 | STARD8   | ENSGALT00000007510 |        |
| ENSGALT00000007137 | EDA      | ENSGALT00000007566 |        |
| ENSGALT00000008954 | GFER     | ENSGALT00000007592 | DHRS7B |
| ENSGALT00000009002 |          | ENSGALT00000019990 | KLHDC1 |
| ENSGALT00000009013 |          | ENSGALT00000032448 |        |
| ENSGALT00000040650 |          | ENSGALT00000020029 |        |
| ENSGALT00000006629 |          | ENSGALT00000007656 | MPRIP  |
| ENSGALT00000006532 |          | ENSGALT00000020041 | VCPKMT |
| ENSGALT00000006500 |          | ENSGALT00000020050 | SOS2   |
| ENSGALT00000006376 |          | ENSGALT00000020072 | L2HGDH |
| ENSGALT00000015015 |          | ENSGALT00000020133 | MAP4K5 |
| ENSGALT00000022940 |          | ENSGALT00000007690 |        |
| ENSGALT00000040562 |          | ENSGALT00000007721 |        |
| ENSGALT00000009446 | MLST8    | ENSGALT00000007729 | NT5M   |
| ENSGALT00000006314 | ZDHHC9   | ENSGALT00000007745 |        |
| ENSGALT00000009467 |          | ENSGALT00000007783 |        |
| ENSGALT00000000216 | ZNF638   | ENSGALT00000000237 |        |
| ENSGALT00000009586 | ARHGAP17 | ENSGALT00000020162 | ATL1   |
| ENSGALT00000006167 | PIN4     | ENSGALT00000007838 |        |
| ENSGALT00000006133 |          | ENSGALT00000020164 | SAV1   |
| ENSGALT00000009734 |          | ENSGALT00000020196 |        |
| ENSGALT00000009821 |          | ENSGALT00000020205 | FRMD6  |
| ENSGALT00000009868 |          | ENSGALT00000007980 | ALKBH5 |
| ENSGALT00000007708 | HDAC8    | ENSGALT00000020241 | NID2   |
| ENSGALT00000007756 |          | ENSGALT00000020248 | TXNDC1 |

|                    |          |                    |              |
|--------------------|----------|--------------------|--------------|
| ENSGALT00000007851 |          | ENSGALT00000020294 | GNPNAT<br>1  |
| ENSGALT00000000161 |          | ENSGALT00000020309 | FERMT2       |
| ENSGALT00000007950 |          | ENSGALT00000020311 | DDHD1        |
| ENSGALT00000010366 | KCTD5    | ENSGALT00000020354 | MIS18BP<br>1 |
| ENSGALT00000007959 | TIMM8A   | ENSGALT00000008014 | MIEF2        |
| ENSGALT00000010394 |          | ENSGALT00000020376 | PRPF39       |
| ENSGALT00000010414 | UNKL     | ENSGALT00000020402 | KLHL28       |
| ENSGALT00000010426 |          | ENSGALT00000040656 | SMCR8        |
| ENSGALT00000010464 | KIAA0430 | ENSGALT00000008093 | SHMT1        |
| ENSGALT00000010556 |          | ENSGALT00000000084 |              |
| ENSGALT00000008098 |          | ENSGALT00000000149 |              |
| ENSGALT00000008105 |          | ENSGALT00000008119 |              |
| ENSGALT00000010888 |          | ENSGALT00000019575 |              |
| ENSGALT00000008128 |          | ENSGALT00000031517 |              |
| ENSGALT00000010969 |          | ENSGALT00000003794 |              |
| ENSGALT00000011038 | SMG1     | ENSGALT00000031518 |              |
| ENSGALT00000011107 |          | ENSGALT00000008174 | B9D1         |
| ENSGALT00000008838 |          | ENSGALT00000041141 |              |
| ENSGALT00000011312 | EEF2K    | ENSGALT00000008468 | LMF1         |
| ENSGALT00000011343 | POLR3E   | ENSGALT00000007513 | ZC4H2        |
| ENSGALT00000011412 |          | ENSGALT00000040739 | LAS1L        |
| ENSGALT00000009079 | FOXO4    | ENSGALT00000008614 |              |
| ENSGALT00000011481 |          | ENSGALT00000032414 | VSIG4        |
| ENSGALT00000009239 |          | ENSGALT00000008671 |              |
| ENSGALT00000039834 | C16orf72 | ENSGALT00000008694 |              |
| ENSGALT00000032399 |          | ENSGALT00000007313 |              |
| ENSGALT00000011867 | ABAT     | ENSGALT00000007301 | OPHN1        |
| ENSGALT00000000404 |          | ENSGALT00000007294 | YIPF6        |
| ENSGALT00000009488 |          | ENSGALT00000008816 |              |
| ENSGALT00000009540 |          | ENSGALT00000007282 | STARD8       |
| ENSGALT00000009621 |          | ENSGALT00000007137 | EDA          |
| ENSGALT00000012090 |          | ENSGALT00000008918 |              |
| ENSGALT00000009683 | DOCK11   | ENSGALT00000008954 | GFER         |
| ENSGALT00000012148 |          | ENSGALT00000009002 |              |
| ENSGALT00000012273 | C7orf26  | ENSGALT00000006667 |              |
| ENSGALT00000012315 | MGRN1    | ENSGALT00000006629 |              |
| ENSGALT00000012323 | UBALD1   | ENSGALT00000006532 |              |
| ENSGALT00000012346 |          | ENSGALT00000006500 |              |
| ENSGALT00000012358 | HMOX2    | ENSGALT00000023131 |              |
| ENSGALT00000009795 |          | ENSGALT00000006401 | MARS2        |

|                    |         |                    |          |
|--------------------|---------|--------------------|----------|
| ENSGALT0000009812  | GPC4    | ENSGALT0000006376  |          |
| ENSGALT00000012459 |         | ENSGALT00000015015 |          |
| ENSGALT00000009861 | FAM122B | ENSGALT00000022940 |          |
| ENSGALT00000009889 |         | ENSGALT00000040562 |          |
| ENSGALT00000009895 | MOSPD1  | ENSGALT00000023322 |          |
| ENSGALT00000022056 | MCOLN1  | ENSGALT00000009446 | MLST8    |
| ENSGALT00000012620 |         | ENSGALT00000006314 | ZDHHC9   |
| ENSGALT00000012623 |         | ENSGALT00000009467 |          |
| ENSGALT00000009976 | SLC9A6  | ENSGALT00000000216 | ZNF638   |
| ENSGALT00000009030 | RARA    | ENSGALT00000006167 | PIN4     |
| ENSGALT00000012696 | DNAJA3  | ENSGALT00000006133 |          |
| ENSGALT00000014661 | SMG5    | ENSGALT00000009734 |          |
| ENSGALT00000010117 | KIRREL  | ENSGALT00000009821 |          |
| ENSGALT00000000945 | ETV3    | ENSGALT00000009864 |          |
| ENSGALT00000010487 |         | ENSGALT00000009868 |          |
| ENSGALT00000021621 | PRCC    | ENSGALT00000009913 | GGA2     |
| ENSGALT00000010594 | MCF2    | ENSGALT00000007708 | HDAC8    |
| ENSGALT00000021620 | MRPL24  | ENSGALT00000007756 |          |
| ENSGALT00000028290 |         | ENSGALT00000007851 |          |
| ENSGALT00000004228 | DECR2   | ENSGALT00000007937 | GLA      |
| ENSGALT00000023483 |         | ENSGALT00000010199 | NSMCE1   |
| ENSGALT00000004086 | MSS51   | ENSGALT00000007950 |          |
| ENSGALT00000021963 | S100A13 | ENSGALT00000010366 | KCTD5    |
| ENSGALT00000001529 |         | ENSGALT00000007959 | TIMM8A   |
| ENSGALT00000003862 |         | ENSGALT00000010394 |          |
| ENSGALT00000040760 |         | ENSGALT00000010426 |          |
| ENSGALT00000034473 |         | ENSGALT00000010464 | KIAA0430 |
| ENSGALT00000014892 |         | ENSGALT00000010556 |          |
| ENSGALT00000003641 |         | ENSGALT00000008098 |          |
| ENSGALT00000003589 | SPSB3   | ENSGALT00000008105 |          |
| ENSGALT00000003298 | SEC14L5 | ENSGALT00000010888 |          |
| ENSGALT00000004258 | ATP8B2  | ENSGALT00000008128 |          |
| ENSGALT00000011011 |         | ENSGALT00000010969 |          |
| ENSGALT00000003142 | CAPN15  | ENSGALT00000011038 | SMG1     |
| ENSGALT00000011029 |         | ENSGALT00000011107 |          |
| ENSGALT00000003054 | ABCA3   | ENSGALT00000008838 |          |
| ENSGALT00000022043 | TPM3    | ENSGALT00000011230 | C16orf52 |
| ENSGALT00000023591 | ASH1L   | ENSGALT00000011312 | EEF2K    |
| ENSGALT00000015109 | RNPS1   | ENSGALT00000011343 | POLR3E   |
| ENSGALT00000015029 |         | ENSGALT00000011412 |          |
| ENSGALT00000023613 |         | ENSGALT00000009079 | FOXO4    |
| ENSGALT00000015002 |         | ENSGALT00000011481 |          |

|                    |         |                    |          |
|--------------------|---------|--------------------|----------|
| ENSGALT00000032362 |         | ENSGALT00000009229 |          |
| ENSGALT00000023620 |         | ENSGALT00000009239 |          |
| ENSGALT00000029552 |         | ENSGALT00000039834 | C16orf72 |
| ENSGALT00000017111 |         | ENSGALT00000011867 | ABAT     |
| ENSGALT00000001109 |         | ENSGALT00000000404 |          |
| ENSGALT00000001122 |         | ENSGALT00000009488 |          |
| ENSGALT00000002849 | ROGDI   | ENSGALT00000009540 |          |
| ENSGALT00000040574 |         | ENSGALT00000009621 |          |
| ENSGALT00000003152 | GPRC5B  | ENSGALT00000009683 | DOCK11   |
| ENSGALT00000029798 | KNOP1   | ENSGALT00000036188 |          |
| ENSGALT00000003559 | DCUN1D3 | ENSGALT00000012148 |          |
| ENSGALT00000011713 |         | ENSGALT00000012543 |          |
| ENSGALT00000019489 |         | ENSGALT00000012273 | C7orf26  |
| ENSGALT00000040550 | PI4KB   | ENSGALT00000039617 |          |
| ENSGALT00000001276 |         | ENSGALT00000012315 | MGRN1    |
| ENSGALT00000015681 | KCTD12  | ENSGALT00000012323 | UBALD1   |
| ENSGALT00000000505 |         | ENSGALT00000012346 |          |
| ENSGALT00000012247 |         | ENSGALT00000012358 | HMOX2    |
| ENSGALT00000003096 | PRUNE   | ENSGALT00000009795 |          |
| ENSGALT00000012271 |         | ENSGALT00000009812 | GPC4     |
| ENSGALT00000012291 | AMER1   | ENSGALT00000012459 |          |
| ENSGALT00000012370 |         | ENSGALT00000009861 | FAM122B  |
| ENSGALT00000012409 |         | ENSGALT00000009889 |          |
| ENSGALT00000012454 |         | ENSGALT00000009895 | MOSPD1   |
| ENSGALT00000041392 | POGZ    | ENSGALT00000022056 | MCOLN1   |
| ENSGALT00000012493 |         | ENSGALT00000012620 |          |
| ENSGALT00000039451 |         | ENSGALT00000012623 |          |
| ENSGALT00000012569 |         | ENSGALT00000009976 | SLC9A6   |
| ENSGALT00000012638 |         | ENSGALT00000012696 | DNAJA3   |
| ENSGALT00000012629 | ABCB7   | ENSGALT00000014661 | SMG5     |
| ENSGALT00000012737 | ATRX    | ENSGALT00000021945 |          |
| ENSGALT00000012759 |         | ENSGALT00000010117 | KIRREL   |
| ENSGALT00000012893 |         | ENSGALT00000010428 |          |
| ENSGALT00000012996 | CAPN6   | ENSGALT00000000945 | ETV3     |
| ENSGALT00000013077 | PAK3    | ENSGALT00000010487 |          |
| ENSGALT00000013105 |         | ENSGALT00000021621 | PRCC     |
| ENSGALT00000013107 | AMMECR1 | ENSGALT00000010594 | MCF2     |
| ENSGALT00000013109 |         | ENSGALT00000028290 |          |
| ENSGALT00000013126 | ACSL4   | ENSGALT00000004228 | DECR2    |
| ENSGALT00000013221 | COL4A5  | ENSGALT00000023483 |          |
| ENSGALT00000013217 | COL4A5  | ENSGALT00000004086 | MSS51    |
| ENSGALT00000012265 | NIT1    | ENSGALT00000021963 | S100A13  |

|                    |          |                    |             |
|--------------------|----------|--------------------|-------------|
| ENSGALT00000013447 | COL4A6   | ENSGALT00000001529 |             |
| ENSGALT00000013485 |          | ENSGALT00000003862 |             |
| ENSGALT00000013668 | VBP1     | ENSGALT00000034473 |             |
| ENSGALT00000013858 | THOC2    | ENSGALT00000014892 |             |
| ENSGALT00000013866 |          | ENSGALT00000003641 |             |
| ENSGALT00000013871 |          | ENSGALT00000003589 | SPSB3       |
| ENSGALT00000013942 | CUL4B    | ENSGALT00000011109 | SHC1        |
| ENSGALT00000013962 |          | ENSGALT00000003298 | SEC14L5     |
| ENSGALT00000014012 | TMEM255A | ENSGALT00000003249 | NAGPA       |
| ENSGALT00000039073 | UPF3B    | ENSGALT00000004258 | ATP8B2      |
| ENSGALT00000039072 |          | ENSGALT00000011011 |             |
| ENSGALT00000014085 |          | ENSGALT00000003142 | CAPN15      |
| ENSGALT00000014088 |          | ENSGALT00000011029 |             |
| ENSGALT00000014093 | CXorf56  | ENSGALT00000003054 | ABCA3       |
| ENSGALT00000014132 | SLC25A43 | ENSGALT00000022043 | TPM3        |
| ENSGALT00000039050 |          | ENSGALT00000023591 | ASH1L       |
| ENSGALT00000014414 | FAM199X  | ENSGALT00000011214 | POF1B       |
| ENSGALT00000014623 | CXorf57  | ENSGALT00000011305 |             |
| ENSGALT00000014716 | TBC1D8B  | ENSGALT00000015124 | TELO2       |
| ENSGALT00000014753 |          | ENSGALT00000015109 | RNPS1       |
| ENSGALT00000014767 | CD99L2   | ENSGALT00000023607 | SYT11       |
| ENSGALT00000014782 | MTMR1    | ENSGALT00000015029 |             |
| ENSGALT00000014807 | MTM1     | ENSGALT00000023613 |             |
| ENSGALT00000009805 |          | ENSGALT00000015002 |             |
| ENSGALT00000029631 | ATF1     | ENSGALT00000032362 |             |
| ENSGALT00000009909 | DIP2B    | ENSGALT00000023620 |             |
| ENSGALT00000014996 |          | ENSGALT00000017111 |             |
| ENSGALT00000009980 | CERS5    | ENSGALT00000001109 |             |
| ENSGALT00000015038 |          | ENSGALT00000002849 | ROGDI       |
| ENSGALT00000015067 | PLRG1    | ENSGALT00000040574 |             |
| ENSGALT00000015084 |          | ENSGALT00000003152 | GPRC5B      |
| ENSGALT00000032288 | MAP9     | ENSGALT00000029798 | KNOP1       |
| ENSGALT00000015246 | GUCY1B3  | ENSGALT00000003334 | THUMPD<br>1 |
| ENSGALT00000028268 | GPD1     | ENSGALT00000003559 | DCUN1D<br>3 |
| ENSGALT00000010024 | SMARCD1  | ENSGALT00000011713 |             |
| ENSGALT00000015275 |          | ENSGALT00000019489 |             |
| ENSGALT00000015333 | FAM198B  | ENSGALT00000003923 | UQCRC2      |
| ENSGALT00000010260 | RAPGEF3  | ENSGALT00000040550 | PI4KB       |
| ENSGALT00000015372 |          | ENSGALT00000032336 | NSDHL       |
| ENSGALT00000015382 | PPID     | ENSGALT00000001276 |             |



|                    |          |                    |              |
|--------------------|----------|--------------------|--------------|
| ENSGALT00000015423 | RAPGEF2  | ENSGALT00000012141 |              |
| ENSGALT00000009619 |          | ENSGALT00000012173 |              |
| ENSGALT00000015511 | TMEM192  | ENSGALT00000015681 | KCTD12       |
| ENSGALT00000015566 |          | ENSGALT00000012247 |              |
| ENSGALT00000015714 | PALLD    | ENSGALT00000003096 | PRUNE        |
| ENSGALT00000019766 |          | ENSGALT00000012271 |              |
| ENSGALT00000019115 | ARHGAP35 | ENSGALT00000012279 |              |
| ENSGALT00000015774 | SH3RF1   | ENSGALT00000012291 | AMER1        |
| ENSGALT00000015813 | CBR4     | ENSGALT00000012370 |              |
| ENSGALT00000015841 | PCDH18   | ENSGALT00000012409 |              |
| ENSGALT00000015887 |          | ENSGALT00000012454 |              |
| ENSGALT00000015926 |          | ENSGALT00000041392 | POGZ         |
| ENSGALT00000015941 | SETD7    | ENSGALT00000012483 |              |
| ENSGALT00000032252 |          | ENSGALT00000012493 |              |
| ENSGALT00000016039 | RNF150   | ENSGALT00000039451 |              |
| ENSGALT00000016070 | USP38    | ENSGALT00000012569 |              |
| ENSGALT00000016095 | GAB1     | ENSGALT00000012638 |              |
| ENSGALT00000016203 | OTUD4    | ENSGALT00000012629 | ABCB7        |
| ENSGALT00000016214 | MMAA     | ENSGALT00000012737 | ATRX         |
| ENSGALT00000016226 | LSM6     | ENSGALT00000012759 |              |
| ENSGALT00000038572 |          | ENSGALT00000012893 |              |
| ENSGALT00000016278 | PRMT10   | ENSGALT00000012996 | CAPN6        |
| ENSGALT00000016302 |          | ENSGALT00000013077 | PAK3         |
| ENSGALT00000016385 | SH3D19   | ENSGALT00000013105 |              |
| ENSGALT00000016422 | PET112   | ENSGALT00000013107 | AMMECR<br>1  |
| ENSGALT00000016433 |          | ENSGALT00000013109 |              |
| ENSGALT00000016446 | SCLT1    | ENSGALT00000013126 | ACSL4        |
| ENSGALT00000016475 |          | ENSGALT00000013221 | COL4A5       |
| ENSGALT00000016483 | HGSNAT   | ENSGALT00000013217 | COL4A5       |
| ENSGALT00000016490 |          | ENSGALT00000013447 | COL4A6       |
| ENSGALT00000016578 | MFSD8    | ENSGALT00000013485 |              |
| ENSGALT00000016607 | JADE1    | ENSGALT00000013668 | VBP1         |
| ENSGALT00000016708 |          | ENSGALT00000013858 | THOC2        |
| ENSGALT00000016727 |          | ENSGALT00000013866 |              |
| ENSGALT00000016820 | CNOT6L   | ENSGALT00000013871 |              |
| ENSGALT00000016846 | CCNG2    | ENSGALT00000013942 | CUL4B        |
| ENSGALT00000016897 | FAM13A   | ENSGALT00000013962 |              |
| ENSGALT00000016908 |          | ENSGALT00000039082 |              |
| ENSGALT00000017134 | ETNPPL   | ENSGALT00000014012 | TMEM25<br>5A |
| ENSGALT00000017138 |          | ENSGALT00000039073 | UPF3B        |

|                    |          |                    |              |
|--------------------|----------|--------------------|--------------|
| ENSGALT00000017142 |          | ENSGALT00000039072 |              |
| ENSGALT00000025976 |          | ENSGALT00000014085 |              |
| ENSGALT00000017158 | PAPSS1   | ENSGALT00000014088 |              |
| ENSGALT00000017210 | INTS12   | ENSGALT00000014093 | CXorf56      |
| ENSGALT00000017222 | PPA2     | ENSGALT00000014132 | SLC25A4<br>3 |
| ENSGALT00000017251 |          | ENSGALT00000039050 |              |
| ENSGALT00000017270 |          | ENSGALT00000014414 | FAM199X      |
| ENSGALT00000017294 |          | ENSGALT00000014447 | IL1RAPL<br>2 |
| ENSGALT00000017342 | RWDD4    | ENSGALT00000014623 | CXorf57      |
| ENSGALT00000017346 | CDKN2AIP | ENSGALT00000014716 | TBC1D8B      |
| ENSGALT00000017366 |          | ENSGALT00000014753 |              |
| ENSGALT00000017488 | SAP30    | ENSGALT00000014763 |              |
| ENSGALT00000017505 |          | ENSGALT00000014767 | CD99L2       |
| ENSGALT00000017617 | ASB5     | ENSGALT00000014782 | MTMR1        |
| ENSGALT00000017629 | VEGFC    | ENSGALT00000014807 | MTM1         |
| ENSGALT00000017682 |          | ENSGALT00000009805 |              |
| ENSGALT00000017688 | G3BP2    | ENSGALT00000029631 | ATF1         |
| ENSGALT00000017693 | BMP2K    | ENSGALT00000029963 |              |
| ENSGALT00000017703 | ANTXR2   | ENSGALT00000009909 | DIP2B        |
| ENSGALT00000017734 | RASGEF1B | ENSGALT00000009960 | LIMA1        |
| ENSGALT00000017784 | NUDT9    | ENSGALT00000009980 | CERS5        |
| ENSGALT00000017992 | AFF1     | ENSGALT00000015038 |              |
| ENSGALT00000018134 | ARHGAP24 | ENSGALT00000015067 | PLRG1        |
| ENSGALT00000018144 |          | ENSGALT00000015084 |              |
| ENSGALT00000018147 | LIN54    | ENSGALT00000032288 | MAP9         |
| ENSGALT00000018201 |          | ENSGALT00000015233 | GUCY1A<br>3  |
| ENSGALT00000018225 | ENOPH1   | ENSGALT00000015246 | GUCY1B<br>3  |
| ENSGALT00000038016 |          | ENSGALT00000028268 | GPD1         |
| ENSGALT00000021658 | ARHGEF11 | ENSGALT00000010024 | SMARCD<br>1  |
| ENSGALT00000018245 |          | ENSGALT00000015275 |              |
| ENSGALT00000001368 |          | ENSGALT00000010135 | RACGAP<br>1  |
| ENSGALT00000029722 | RNF41    | ENSGALT00000010204 |              |
| ENSGALT00000023097 |          | ENSGALT00000015333 | FAM198B      |
| ENSGALT00000018298 |          | ENSGALT00000010260 | RAPGEF<br>3  |
| ENSGALT00000022282 |          | ENSGALT00000032282 |              |
| ENSGALT00000022286 | SOCS7    | ENSGALT00000015372 |              |

|                    |          |                    |              |
|--------------------|----------|--------------------|--------------|
| ENSGALT00000018386 |          | ENSGALT00000015382 | PPID         |
| ENSGALT00000018500 | TECRL    | ENSGALT00000009619 |              |
| ENSGALT00000040660 |          | ENSGALT00000015511 | TMEM19<br>2  |
| ENSGALT00000032173 | NOA1     | ENSGALT00000015566 |              |
| ENSGALT00000018580 | REST     | ENSGALT00000015714 | PALLD        |
| ENSGALT00000001580 |          | ENSGALT00000015738 | C4orf27      |
| ENSGALT00000018588 |          | ENSGALT00000019115 | ARHGAP<br>35 |
| ENSGALT00000001793 | NCOA6    | ENSGALT00000015813 | CBR4         |
| ENSGALT00000001850 | PIGU     | ENSGALT00000015841 | PCDH18       |
| ENSGALT00000041395 | LEPROTL1 | ENSGALT00000015887 |              |
| ENSGALT00000018652 |          | ENSGALT00000015926 |              |
| ENSGALT00000018662 | MFHAS1   | ENSGALT00000015941 | SETD7        |
| ENSGALT00000018669 |          | ENSGALT00000015954 | MAML3        |
| ENSGALT00000002165 |          | ENSGALT00000032252 |              |
| ENSGALT00000001556 | MTMR4    | ENSGALT00000016039 | RNF150       |
| ENSGALT00000002265 | NDRG3    | ENSGALT00000016070 | USP38        |
| ENSGALT00000018681 | CCNI     | ENSGALT00000016095 | GAB1         |
| ENSGALT00000002314 | PHF20    | ENSGALT00000016203 | OTUD4        |
| ENSGALT00000002335 |          | ENSGALT00000016214 | MMAA         |
| ENSGALT00000018738 | SCARB2   | ENSGALT00000038572 |              |
| ENSGALT00000002384 |          | ENSGALT00000016278 | PRMT10       |
| ENSGALT00000001603 | ELN      | ENSGALT00000016293 | ARHGAP<br>10 |
| ENSGALT00000002696 |          | ENSGALT00000016302 |              |
| ENSGALT00000001666 |          | ENSGALT00000016385 | SH3D19       |
| ENSGALT00000001706 | WBSCR17  | ENSGALT00000016422 | PET112       |
| ENSGALT00000021722 |          | ENSGALT00000016433 |              |
| ENSGALT00000021729 | NXNL1    | ENSGALT00000016446 | SCLT1        |
| ENSGALT00000021883 |          | ENSGALT00000016475 |              |
| ENSGALT00000018826 | SDAD1    | ENSGALT00000016483 | HGSNAT       |
| ENSGALT00000018860 | RUFY3    | ENSGALT00000016490 |              |
| ENSGALT00000018869 | GRSF1    | ENSGALT00000032235 |              |
| ENSGALT00000029792 |          | ENSGALT00000016555 |              |
| ENSGALT00000021915 | ATP13A1  | ENSGALT00000016572 | PLK4         |
| ENSGALT00000002729 | CEP250   | ENSGALT00000016578 | MFSD8        |
| ENSGALT00000001766 |          | ENSGALT00000016607 | JADE1        |
| ENSGALT00000002775 |          | ENSGALT00000016708 |              |
| ENSGALT00000001925 | GTF2I    | ENSGALT00000016727 |              |
| ENSGALT00000019023 | ANKRD17  | ENSGALT00000016753 |              |
| ENSGALT00000002799 |          | ENSGALT00000016846 | CCNG2        |

|                    |          |                    |          |
|--------------------|----------|--------------------|----------|
| ENSGALT00000003157 | AHCY     | ENSGALT00000016897 | FAM13A   |
| ENSGALT00000001926 | GTF2IRD1 | ENSGALT00000017134 | ETNPPL   |
| ENSGALT00000019202 | UBA6     | ENSGALT00000017138 |          |
| ENSGALT00000002942 | MAP1LC3A | ENSGALT00000017142 |          |
| ENSGALT00000002964 | DYNLRB1  | ENSGALT00000025976 |          |
| ENSGALT00000003027 | ITCH     | ENSGALT00000017158 | PAPSS1   |
| ENSGALT00000003180 |          | ENSGALT00000017190 |          |
| ENSGALT00000040421 | RALY     | ENSGALT00000017210 | INTS12   |
| ENSGALT00000004812 | PXMP4    | ENSGALT00000017222 | PPA2     |
| ENSGALT00000004975 |          | ENSGALT00000017251 |          |
| ENSGALT00000005318 | ACSS2    | ENSGALT00000017270 |          |
| ENSGALT00000019307 | ANKRD50  | ENSGALT00000017294 |          |
| ENSGALT00000019309 |          | ENSGALT00000017317 | ENPP6    |
| ENSGALT00000019311 | NUDT6    | ENSGALT00000017342 | RWDD4    |
| ENSGALT00000040447 |          | ENSGALT00000017346 | CDKN2AIP |
| ENSGALT00000002223 | ANKFY1   | ENSGALT00000017366 |          |
| ENSGALT00000005391 | SOGA1    | ENSGALT00000017483 |          |
| ENSGALT00000002242 | CYB5D2   | ENSGALT00000017488 | SAP30    |
| ENSGALT00000002350 | ZZEF1    | ENSGALT00000017617 | ASB5     |
| ENSGALT00000019560 |          | ENSGALT00000017629 | VEGFC    |
| ENSGALT00000019566 | SYNPO2   | ENSGALT00000017682 |          |
| ENSGALT00000019581 | SEC24D   | ENSGALT00000017688 | G3BP2    |
| ENSGALT00000002517 | DERL2    | ENSGALT00000017693 | BMP2K    |
| ENSGALT00000002525 | C1QBP    | ENSGALT00000017695 | PAQR3    |
| ENSGALT00000037701 |          | ENSGALT00000017703 | ANTXR2   |
| ENSGALT00000019661 |          | ENSGALT00000017784 | NUDT9    |
| ENSGALT00000005832 |          | ENSGALT00000017992 | AFF1     |
| ENSGALT00000006112 |          | ENSGALT00000018134 | ARHGAP24 |
| ENSGALT00000006220 | PIGT     | ENSGALT00000018144 |          |
| ENSGALT00000019679 | LARP7    | ENSGALT00000018147 | LIN54    |
| ENSGALT00000006261 |          | ENSGALT00000018201 |          |
| ENSGALT00000006265 |          | ENSGALT00000018225 | ENOPH1   |
| ENSGALT00000002828 | SH2B2    | ENSGALT00000038016 |          |
| ENSGALT00000006521 |          | ENSGALT00000021658 | ARHGEF11 |
| ENSGALT00000006537 | TOMM34   | ENSGALT00000001368 |          |
| ENSGALT00000019895 | PLA2G12A | ENSGALT00000029722 | RNF41    |
| ENSGALT00000037662 |          | ENSGALT00000023097 |          |
| ENSGALT00000002880 |          | ENSGALT00000018298 |          |
| ENSGALT00000019968 | TSPAN5   | ENSGALT00000022282 |          |

|                     |          |                    |              |
|---------------------|----------|--------------------|--------------|
| ENSGALT0000006588   |          | ENSGALT0000002286  | SOCS7        |
| ENSGALT0000006710   |          | ENSGALT00000018386 |              |
| ENSGALT00000019988  |          | ENSGALT00000018500 | TECRL        |
| ENSGALT00000006749  |          | ENSGALT00000040660 |              |
| ENSGALT00000039955  | JPH2     | ENSGALT00000032173 | NOA1         |
| ENSGALT00000002944  | DTX2     | ENSGALT00000001580 |              |
| ENSGALT00000003016  | MDH2     | ENSGALT00000018588 |              |
| ENSGALT00000007275  | NCOA3    | ENSGALT00000001793 | NCOA6        |
| ENSGALT00000007499  | CSE1L    | ENSGALT00000001850 | PIGU         |
| ENSGALT00000003069  | TMEM120A | ENSGALT00000041395 | LEPROT<br>L1 |
| ENSGALT00000020032  | TRMT10A  | ENSGALT00000002032 | RBL1         |
| ENSGALT00000034233  | KCNB1    | ENSGALT00000018652 |              |
| ENSGALT00000000071  |          | ENSGALT00000018662 | MFHAS1       |
| ENSGALT00000000070  |          | ENSGALT00000018669 |              |
| ENSGALT00000003192  |          | ENSGALT00000002165 |              |
| ENSGALT00000020064  | EMCN     | ENSGALT00000001556 | MTMR4        |
| ENSGALT00000007724  | CCNDBP1  | ENSGALT00000002265 | NDRG3        |
| ENSGALT00000020115  | MANBA    | ENSGALT00000018681 | CCNI         |
| ENSGALT00000020119  |          | ENSGALT00000002314 | PHF20        |
| ENSGALT00000008180  |          | ENSGALT00000002335 |              |
| ENSGALT00000020161  | BDH2     | ENSGALT00000002485 |              |
| ENSGALT00000003372  | PEX12    | ENSGALT00000018738 | SCARB2       |
| ENSGALT00000008232  | LSM14B   | ENSGALT00000002384 |              |
| ENSGALT000000021880 |          | ENSGALT00000001603 | ELN          |
| ENSGALT00000008294  | MTG2     | ENSGALT00000002696 |              |
| ENSGALT00000003484  |          | ENSGALT00000018760 | NUP54        |
| ENSGALT00000008344  |          | ENSGALT00000001666 |              |
| ENSGALT00000008535  | LAMA5    | ENSGALT00000001706 | WBSCR1<br>7  |
| ENSGALT00000003612  | TMEM132E | ENSGALT00000021722 |              |
| ENSGALT00000022040  |          | ENSGALT00000021729 | NXNL1        |
| ENSGALT00000041383  |          | ENSGALT00000021883 |              |
| ENSGALT00000023517  |          | ENSGALT00000018860 | RUFY3        |
| ENSGALT00000022100  | FAT1     | ENSGALT00000018869 | GRSF1        |
| ENSGALT00000009067  |          | ENSGALT00000001731 | AUTS2        |
| ENSGALT00000022137  |          | ENSGALT00000021915 | ATP13A1      |
| ENSGALT00000003757  |          | ENSGALT00000002729 | CEP250       |
| ENSGALT00000009144  |          | ENSGALT00000001766 |              |
| ENSGALT00000003859  |          | ENSGALT00000001779 |              |
| ENSGALT00000037573  |          | ENSGALT00000002775 |              |
| ENSGALT00000032107  | PDGFRL   | ENSGALT00000001925 | GTF2I        |

|                    |         |                    |              |
|--------------------|---------|--------------------|--------------|
| ENSGALT00000022171 |         | ENSGALT00000019023 | ANKRD1<br>7  |
| ENSGALT00000009286 |         | ENSGALT00000002799 |              |
| ENSGALT00000009312 |         | ENSGALT00000003157 | AHCY         |
| ENSGALT00000022194 | VPS37A  | ENSGALT00000001926 | GTF2IRD<br>1 |
| ENSGALT00000009385 |         | ENSGALT00000019202 | UBA6         |
| ENSGALT00000033928 |         | ENSGALT00000002942 | MAP1LC<br>3A |
| ENSGALT00000009494 | PCMTD2  | ENSGALT00000019246 |              |
| ENSGALT00000022308 |         | ENSGALT00000002964 | DYNLRB<br>1  |
| ENSGALT00000009656 | PRPF6   | ENSGALT00000003027 | ITCH         |
| ENSGALT00000003916 |         | ENSGALT00000040421 | RALY         |
| ENSGALT00000003944 |         | ENSGALT00000004812 | PXMP4        |
| ENSGALT00000004011 |         | ENSGALT00000004815 |              |
| ENSGALT00000004075 | CRCP    | ENSGALT00000004840 |              |
| ENSGALT00000004087 | TPST1   | ENSGALT00000004975 |              |
| ENSGALT00000004122 |         | ENSGALT00000005318 | ACSS2        |
| ENSGALT00000009779 | ZBTB46  | ENSGALT00000019307 | ANKRD5<br>0  |
| ENSGALT00000004144 | TMEM248 | ENSGALT00000019309 |              |
| ENSGALT00000036310 |         | ENSGALT00000019311 | NUDT6        |
| ENSGALT00000032094 | SRD5A3  | ENSGALT00000040447 |              |
| ENSGALT00000004146 | FAM211A | ENSGALT00000002223 | ANKFY1       |
| ENSGALT00000004183 |         | ENSGALT00000005391 | SOGA1        |
| ENSGALT00000022578 | CHIC2   | ENSGALT00000002242 | CYB5D2       |
| ENSGALT00000004394 | PITPNA  | ENSGALT00000002350 | ZZEF1        |
| ENSGALT00000022602 | SCFD2   | ENSGALT00000019519 |              |
| ENSGALT00000032088 | USP46   | ENSGALT00000019560 |              |
| ENSGALT00000022640 |         | ENSGALT00000019566 | SYNPO2       |
| ENSGALT00000022792 | DCUN1D4 | ENSGALT00000019581 | SEC24D       |
| ENSGALT00000009996 | SLC52A3 | ENSGALT00000019584 |              |
| ENSGALT00000000023 |         | ENSGALT00000002517 | DERL2        |
| ENSGALT00000009999 |         | ENSGALT00000002525 | C1QBP        |
| ENSGALT00000004467 | SCARF1  | ENSGALT00000037701 |              |
| ENSGALT00000022799 | OCIAD1  | ENSGALT00000019661 |              |
| ENSGALT00000010006 | TBC1D20 | ENSGALT00000005832 |              |
| ENSGALT00000004650 | PRPF8   | ENSGALT00000006112 |              |
| ENSGALT00000010020 | HM13    | ENSGALT00000006220 | PIGT         |
| ENSGALT00000022847 | SLAIN2  | ENSGALT00000035106 | RABL5        |
| ENSGALT00000010025 |         | ENSGALT00000019679 | LARP7        |

|                    |          |                    |              |
|--------------------|----------|--------------------|--------------|
| ENSGALT00000010073 |          | ENSGALT00000006265 |              |
| ENSGALT00000010129 |          | ENSGALT00000006521 |              |
| ENSGALT00000010138 |          | ENSGALT00000006537 | TOMM34       |
| ENSGALT00000010406 |          | ENSGALT00000019895 | PLA2G12<br>A |
| ENSGALT00000004762 |          | ENSGALT00000019897 |              |
| ENSGALT00000010607 | TM9SF4   | ENSGALT00000037662 |              |
| ENSGALT00000022980 |          | ENSGALT00000002880 |              |
| ENSGALT00000022997 |          | ENSGALT00000019968 | TSPAN5       |
| ENSGALT00000004849 |          | ENSGALT00000006588 |              |
| ENSGALT00000023042 | SLC30A9  | ENSGALT00000006631 |              |
| ENSGALT00000023043 | TMEM33   | ENSGALT00000006710 |              |
| ENSGALT00000004908 | SMG6     | ENSGALT00000019988 |              |
| ENSGALT00000010635 | PLAGL2   | ENSGALT00000006749 |              |
| ENSGALT00000010675 | ASXL1    | ENSGALT00000039955 | JPH2         |
| ENSGALT00000005087 | POLDIP2  | ENSGALT00000002944 | DTX2         |
| ENSGALT00000023145 | SMIM14   | ENSGALT00000040248 |              |
| ENSGALT00000023144 |          | ENSGALT00000003016 | MDH2         |
| ENSGALT00000023136 | LIAS     | ENSGALT00000007180 |              |
| ENSGALT00000010897 | CDK5RAP1 | ENSGALT00000007309 | SULF2        |
| ENSGALT00000010917 |          | ENSGALT00000007499 | CSE1L        |
| ENSGALT00000029529 | KLHL5    | ENSGALT00000003069 | TMEM12<br>0A |
| ENSGALT00000000233 | KLF3     | ENSGALT00000020032 | TRMT10<br>A  |
| ENSGALT00000022020 | TBC1D1   | ENSGALT00000007543 |              |
| ENSGALT00000039224 |          | ENSGALT00000034233 | KCNB1        |
| ENSGALT00000003519 |          | ENSGALT00000000070 |              |
| ENSGALT00000010979 |          | ENSGALT00000003192 |              |
| ENSGALT00000003581 | MFSD6    | ENSGALT00000028340 |              |
| ENSGALT00000003630 |          | ENSGALT00000020064 | EMCN         |
| ENSGALT00000003720 |          | ENSGALT00000003246 | MMP19        |
| ENSGALT00000003753 | OSGEPL1  | ENSGALT00000007669 | EPB42        |
| ENSGALT00000021744 | PCBP2    | ENSGALT00000007724 | CCNDBP<br>1  |
| ENSGALT00000000200 | SUPT6H   | ENSGALT00000020115 | MANBA        |
| ENSGALT00000003781 |          | ENSGALT00000020119 |              |
| ENSGALT00000011061 | SNX21    | ENSGALT00000008180 |              |
| ENSGALT00000023186 | STIM2    | ENSGALT00000020161 | BDH2         |
| ENSGALT00000011074 | ACOT8    | ENSGALT00000003372 | PEX12        |
| ENSGALT00000003954 | COL5A2   | ENSGALT00000008232 | LSM14B       |
| ENSGALT00000011138 |          | ENSGALT00000021898 | SORBS2       |

|                    |         |                    |              |
|--------------------|---------|--------------------|--------------|
| ENSGALT00000023214 | SEL1L3  | ENSGALT00000008294 | MTG2         |
| ENSGALT00000039136 | PCIF1   | ENSGALT00000008344 |              |
| ENSGALT00000004032 |         | ENSGALT00000008535 | LAMA5        |
| ENSGALT00000034022 | TFPI    | ENSGALT00000003612 | TMEM13<br>2E |
| ENSGALT00000004147 |         | ENSGALT00000022040 |              |
| ENSGALT00000006318 | RPL23A  | ENSGALT00000041383 |              |
| ENSGALT00000011227 | SLC12A5 | ENSGALT00000023517 |              |
| ENSGALT00000011344 | NCOA5   | ENSGALT00000022114 |              |
| ENSGALT00000004253 | DUSP19  | ENSGALT00000003748 |              |
| ENSGALT00000004344 | NCKAP1  | ENSGALT00000009067 |              |
| ENSGALT00000011732 |         | ENSGALT00000022137 |              |
| ENSGALT00000012067 | CTSZ    | ENSGALT00000003757 |              |
| ENSGALT00000023256 | SOD3    | ENSGALT00000009144 |              |
| ENSGALT00000006365 |         | ENSGALT00000003859 |              |
| ENSGALT00000023259 |         | ENSGALT00000037573 |              |
| ENSGALT00000023263 |         | ENSGALT00000032107 | PDGFRL       |
| ENSGALT00000039685 |         | ENSGALT00000022171 |              |
| ENSGALT00000006386 | DHRS13  | ENSGALT00000009286 |              |
| ENSGALT00000012184 | NPEPL1  | ENSGALT00000009312 |              |
| ENSGALT00000012194 |         | ENSGALT00000022194 | VPS37A       |
| ENSGALT00000006417 | PHF12   | ENSGALT00000022198 |              |
| ENSGALT00000004363 |         | ENSGALT00000009385 |              |
| ENSGALT00000041120 | FSTL3   | ENSGALT00000033928 |              |
| ENSGALT00000004522 | KANSL1L | ENSGALT00000009494 | PCMTD2       |
| ENSGALT00000012215 |         | ENSGALT00000022308 |              |
| ENSGALT00000004557 |         | ENSGALT00000022312 |              |
| ENSGALT00000004587 |         | ENSGALT00000009656 | PRPF6        |
| ENSGALT00000040054 |         | ENSGALT00000003944 |              |
| ENSGALT00000012397 |         | ENSGALT00000004011 |              |
| ENSGALT00000004610 |         | ENSGALT00000004075 | CRCP         |
| ENSGALT00000012648 | ZNF217  | ENSGALT00000004087 | TPST1        |
| ENSGALT00000023419 |         | ENSGALT00000004122 |              |
| ENSGALT00000012669 | TSHZ2   | ENSGALT00000009779 | ZBTB46       |
| ENSGALT00000023420 |         | ENSGALT00000004144 | TMEM24<br>8  |
| ENSGALT00000023421 | FBXL5   | ENSGALT00000036322 |              |
| ENSGALT00000028050 | DPM1    | ENSGALT00000036310 |              |
| ENSGALT00000024191 | LYAR    | ENSGALT00000009828 |              |
| ENSGALT00000038844 |         | ENSGALT00000032094 | SRD5A3       |
| ENSGALT00000013022 |         | ENSGALT00000004146 | FAM211A      |
| ENSGALT00000013071 | B4GALT5 | ENSGALT00000004183 |              |



|                    |          |                    |              |
|--------------------|----------|--------------------|--------------|
| ENSGALT0000006434  | NUFIP2   | ENSGALT00000022578 | CHIC2        |
| ENSGALT00000024208 |          | ENSGALT00000004394 | PITPNA       |
| ENSGALT00000005653 |          | ENSGALT00000022602 | SCFD2        |
| ENSGALT00000005664 |          | ENSGALT00000032088 | USP46        |
| ENSGALT00000004660 | TXNL1    | ENSGALT00000022640 |              |
| ENSGALT00000004573 | ALPK2    | ENSGALT00000022792 | DCUN1D<br>4  |
| ENSGALT00000004529 | MALT1    | ENSGALT00000009996 | SLC52A3      |
| ENSGALT00000034909 | SSH2     | ENSGALT00000009999 |              |
| ENSGALT00000025037 | WFS1     | ENSGALT00000022799 | OCIAD1       |
| ENSGALT00000006652 | NSRP1    | ENSGALT00000010006 | TBC1D20      |
| ENSGALT00000025045 | MAN2B2   | ENSGALT00000004650 | PRPF8        |
| ENSGALT00000006250 |          | ENSGALT00000010020 | HM13         |
| ENSGALT00000006838 | CPD      | ENSGALT00000022828 | FRYL         |
| ENSGALT00000004384 |          | ENSGALT00000022847 | SLAIN2       |
| ENSGALT00000004279 | LIPG     | ENSGALT00000010025 |              |
| ENSGALT00000025066 |          | ENSGALT00000010073 |              |
| ENSGALT00000006274 |          | ENSGALT00000010129 |              |
| ENSGALT00000006341 | IQCA1    | ENSGALT00000004728 | SERPINF<br>2 |
| ENSGALT00000006438 |          | ENSGALT00000004762 |              |
| ENSGALT00000025088 | ABLIM2   | ENSGALT00000010607 | TM9SF4       |
| ENSGALT00000025114 | HTRA3    | ENSGALT00000022980 |              |
| ENSGALT00000025139 | ACOX3    | ENSGALT00000022997 |              |
| ENSGALT00000006898 |          | ENSGALT00000004849 |              |
| ENSGALT00000025174 | DOK7     | ENSGALT00000023042 | SLC30A9      |
| ENSGALT00000029361 | C18orf32 | ENSGALT00000023043 | TMEM33       |
| ENSGALT00000029461 |          | ENSGALT00000004908 | SMG6         |
| ENSGALT00000039658 |          | ENSGALT00000010635 | PLAGL2       |
| ENSGALT00000006583 | SH3BP4   | ENSGALT00000010675 | ASXL1        |
| ENSGALT00000006741 | TRAF3IP1 | ENSGALT00000005087 | POLDIP2      |
| ENSGALT00000025226 |          | ENSGALT00000039767 | TMEM19<br>9  |
| ENSGALT00000002706 |          | ENSGALT00000023095 | N4BP2        |
| ENSGALT00000007018 | SPECC1   | ENSGALT00000023145 | SMIM14       |
| ENSGALT00000002271 | NISCH    | ENSGALT00000023144 |              |
| ENSGALT00000002333 | STAB1    | ENSGALT00000023136 | LIAS         |
| ENSGALT00000025259 |          | ENSGALT00000010897 | CDK5RA<br>P1 |
| ENSGALT00000002566 | SETBP1   | ENSGALT00000010917 |              |
| ENSGALT00000033730 |          | ENSGALT00000005809 | PIGS         |
| ENSGALT00000003868 | AQP3     | ENSGALT00000029529 | KLHL5        |

|                    |          |                     |         |
|--------------------|----------|---------------------|---------|
| ENSGALT0000002555  |          | ENSGALT00000022105  |         |
| ENSGALT00000007130 | NCOR1    | ENSGALT00000000233  | KLF3    |
| ENSGALT00000025264 | FAM193A  | ENSGALT00000022020  | TBC1D1  |
| ENSGALT00000002382 | NT5DC2   | ENSGALT00000039224  |         |
| ENSGALT00000009315 |          | ENSGALT00000003519  |         |
| ENSGALT00000025319 |          | ENSGALT00000010979  |         |
| ENSGALT00000039669 |          | ENSGALT00000003560  |         |
| ENSGALT00000025330 |          | ENSGALT00000003581  | MFSD6   |
| ENSGALT00000034499 | UBAP1    | ENSGALT00000003630  |         |
| ENSGALT00000009887 |          | ENSGALT00000003720  |         |
| ENSGALT00000007174 | CENPV    | ENSGALT00000021744  | PCBP2   |
| ENSGALT00000002508 |          | ENSGALT00000000200  | SUPT6H  |
| ENSGALT00000009335 |          | ENSGALT00000003781  |         |
| ENSGALT00000009350 | FAM219A  | ENSGALT00000003836  |         |
| ENSGALT00000025335 |          | ENSGALT00000011061  | SNX21   |
| ENSGALT00000034480 |          | ENSGALT00000003954  | COL5A2  |
| ENSGALT00000006957 | MCM3AP   | ENSGALT00000011138  |         |
| ENSGALT00000007195 | TRPV2    | ENSGALT000000037357 |         |
| ENSGALT00000007345 |          | ENSGALT00000023214  | SEL1L3  |
| ENSGALT00000025361 |          | ENSGALT00000039136  | PCIF1   |
| ENSGALT00000007351 | TAX1BP3  | ENSGALT00000004032  |         |
| ENSGALT00000002971 | DNAJB5   | ENSGALT00000004147  |         |
| ENSGALT00000003093 |          | ENSGALT00000023229  | ANAPC4  |
| ENSGALT00000036295 |          | ENSGALT00000023231  | ZCCHC4  |
| ENSGALT00000002638 |          | ENSGALT00000006318  | RPL23A  |
| ENSGALT00000003276 | PFKFB4   | ENSGALT00000011227  | SLC12A5 |
| ENSGALT00000007457 | AKAP10   | ENSGALT00000011344  | NCOA5   |
| ENSGALT00000025439 | PTCD3    | ENSGALT00000004236  | NUP35   |
| ENSGALT00000003341 | HYAL2    | ENSGALT00000004253  | DUSP19  |
| ENSGALT00000012144 |          | ENSGALT00000004344  | NCKAP1  |
| ENSGALT00000025455 | REEP1    | ENSGALT00000011732  |         |
| ENSGALT00000003330 | NPRL2    | ENSGALT00000023246  |         |
| ENSGALT00000003543 |          | ENSGALT00000012067  | CTSZ    |
| ENSGALT00000003585 | MAPKAPK3 | ENSGALT00000012140  |         |
| ENSGALT00000025484 |          | ENSGALT00000023256  | SOD3    |
| ENSGALT00000007525 | ULK2     | ENSGALT00000006365  |         |
| ENSGALT00000003737 |          | ENSGALT00000023259  |         |
| ENSGALT00000012579 | TMEFF2   | ENSGALT00000023263  |         |
| ENSGALT00000025489 |          | ENSGALT00000023270  | GPR125  |
| ENSGALT00000012866 |          | ENSGALT00000012184  | NPEPL1  |
| ENSGALT00000007598 |          | ENSGALT00000012194  |         |
| ENSGALT00000007650 | NXN      | ENSGALT00000006417  | PHF12   |

|                    |           |                    |         |
|--------------------|-----------|--------------------|---------|
| ENSGALT00000023124 |           | ENSGALT00000004363 |         |
| ENSGALT00000013057 | COQ10B    | ENSGALT00000041120 | FSTL3   |
| ENSGALT00000023126 | PAK4      | ENSGALT00000004522 | KANSL1L |
| ENSGALT00000015642 |           | ENSGALT00000012215 |         |
| ENSGALT00000023128 |           | ENSGALT00000004557 |         |
| ENSGALT00000035848 |           | ENSGALT00000004587 |         |
| ENSGALT00000003768 |           | ENSGALT00000012397 |         |
| ENSGALT00000007703 | FAM57A    | ENSGALT00000004610 |         |
| ENSGALT00000025715 | EIF2AK3   | ENSGALT00000033524 | AURKA   |
| ENSGALT00000007801 |           | ENSGALT00000012648 | ZNF217  |
| ENSGALT00000032015 |           | ENSGALT00000012669 | TSHZ2   |
| ENSGALT00000003917 | RNF123    | ENSGALT00000023420 |         |
| ENSGALT00000033513 | C2orf47   | ENSGALT00000028050 | DPM1    |
| ENSGALT00000007833 | FAM101B   | ENSGALT00000012995 | FAM65C  |
| ENSGALT00000025750 | PANK2     | ENSGALT00000024191 | LYAR    |
| ENSGALT00000025773 |           | ENSGALT00000038844 |         |
| ENSGALT00000020313 |           | ENSGALT00000013022 |         |
| ENSGALT00000013252 | KCTD18    | ENSGALT00000013071 | B4GALT5 |
| ENSGALT00000033496 |           | ENSGALT00000006434 | NUFIP2  |
| ENSGALT00000003976 | CREB3     | ENSGALT00000024208 |         |
| ENSGALT00000013327 |           | ENSGALT00000009906 | HELZ2   |
| ENSGALT00000008115 | PPM1E     | ENSGALT00000005653 |         |
| ENSGALT00000004064 |           | ENSGALT00000005664 |         |
| ENSGALT00000008166 |           | ENSGALT00000004660 | TXNL1   |
| ENSGALT00000008181 | GDPD1     | ENSGALT00000006045 |         |
| ENSGALT00000034416 | CA9       | ENSGALT00000004529 | MALT1   |
| ENSGALT00000025784 | UBOX5     | ENSGALT00000025037 | WFS1    |
| ENSGALT00000013409 |           | ENSGALT00000006652 | NSRP1   |
| ENSGALT00000025775 | FASTKD5   | ENSGALT00000025045 | MAN2B2  |
| ENSGALT00000025781 |           | ENSGALT00000006773 |         |
| ENSGALT00000025785 | DDRKG1    | ENSGALT00000006250 |         |
| ENSGALT00000008234 | DHX40     | ENSGALT00000006838 | CPD     |
| ENSGALT00000013633 | TRAK2     | ENSGALT00000004384 |         |
| ENSGALT00000013642 | STRADB    | ENSGALT00000025066 |         |
| ENSGALT00000005129 | RAD54L2   | ENSGALT00000006274 |         |
| ENSGALT00000013654 | TMEM237   | ENSGALT00000006341 | IQCA1   |
| ENSGALT00000005219 | ADAMTS12  | ENSGALT00000006438 |         |
| ENSGALT00000008250 |           | ENSGALT00000025088 | ABLIM2  |
| ENSGALT00000013679 | MPP4      | ENSGALT00000025114 | HTRA3   |
| ENSGALT00000005305 | RAI14     | ENSGALT00000025139 | ACOX3   |
| ENSGALT00000008286 | VMP1      | ENSGALT00000006898 |         |
| ENSGALT00000025818 | C20orf194 | ENSGALT00000025174 | DOK7    |

|                    |         |                    |              |
|--------------------|---------|--------------------|--------------|
| ENSGALT00000025829 | ATRN    | ENSGALT00000039658 |              |
| ENSGALT00000005931 |         | ENSGALT00000006583 | SH3BP4       |
| ENSGALT00000034226 |         | ENSGALT00000006741 | TRAF3IP<br>1 |
| ENSGALT00000006075 | TEX264  | ENSGALT00000006793 | ASB1         |
| ENSGALT00000013707 | ALS2    | ENSGALT00000034546 | ST8SIA5      |
| ENSGALT00000013744 |         | ENSGALT00000025226 |              |
| ENSGALT00000013776 | NOP58   | ENSGALT00000002706 |              |
| ENSGALT00000008348 |         | ENSGALT00000002271 | NISCH        |
| ENSGALT00000006336 |         | ENSGALT00000002333 | STAB1        |
| ENSGALT00000006367 |         | ENSGALT00000025259 |              |
| ENSGALT00000008358 | RNFT1   | ENSGALT00000033730 |              |
| ENSGALT00000036280 |         | ENSGALT00000003868 | AQP3         |
| ENSGALT00000008405 | MED13   | ENSGALT00000002555 |              |
| ENSGALT00000025839 |         | ENSGALT00000007130 | NCOR1        |
| ENSGALT00000008456 |         | ENSGALT00000006991 |              |
| ENSGALT00000005708 |         | ENSGALT00000025262 |              |
| ENSGALT00000025939 | EXOC6B  | ENSGALT00000025264 | FAM193A      |
| ENSGALT00000008492 | BCAS3   | ENSGALT00000025265 |              |
| ENSGALT00000007193 | PARP3   | ENSGALT00000002382 | NT5DC2       |
| ENSGALT00000013828 | CCNYL1  | ENSGALT00000009315 |              |
| ENSGALT00000008505 | PPM1D   | ENSGALT00000041399 | C4orf48      |
| ENSGALT00000008517 |         | ENSGALT00000025319 |              |
| ENSGALT00000008580 |         | ENSGALT00000039669 |              |
| ENSGALT00000005943 | OSMR    | ENSGALT00000025330 |              |
| ENSGALT00000029609 |         | ENSGALT00000034499 | UBAP1        |
| ENSGALT00000023934 | TTC33   | ENSGALT00000009887 |              |
| ENSGALT00000004187 |         | ENSGALT00000007174 | CENPV        |
| ENSGALT00000023947 | C7      | ENSGALT00000002508 |              |
| ENSGALT00000023962 | PLCXD3  | ENSGALT00000009335 |              |
| ENSGALT00000000026 | AAK1    | ENSGALT00000009350 | FAM219A      |
| ENSGALT00000023976 |         | ENSGALT00000025335 |              |
| ENSGALT00000007426 |         | ENSGALT00000025338 |              |
| ENSGALT00000023983 | C5orf28 | ENSGALT00000034480 |              |
| ENSGALT00000000046 |         | ENSGALT00000006957 | MCM3AP       |
| ENSGALT00000041239 | ECSCR   | ENSGALT00000007195 | TRPV2        |
| ENSGALT00000007519 | ASPN    | ENSGALT00000025361 |              |
| ENSGALT00000007571 | NOL8    | ENSGALT00000007351 | TAX1BP3      |
| ENSGALT00000000136 | ANTXR1  | ENSGALT00000007373 | CTNS         |
| ENSGALT00000023988 | PAIP1   | ENSGALT00000002971 | DNAJB5       |
| ENSGALT00000023990 | NNT     | ENSGALT00000003093 |              |
| ENSGALT00000023997 |         | ENSGALT00000036295 |              |

|                    |          |                    |              |
|--------------------|----------|--------------------|--------------|
| ENSGALT00000032856 |          | ENSGALT00000007388 | SHPK         |
| ENSGALT00000007684 | IARS     | ENSGALT00000002638 |              |
| ENSGALT00000024048 | ARL15    | ENSGALT00000003010 |              |
| ENSGALT00000014015 |          | ENSGALT00000003276 | PFKFB4       |
| ENSGALT00000003856 | CTNNA1   | ENSGALT00000007457 | AKAP10       |
| ENSGALT00000014048 | NRP2     | ENSGALT00000025439 | PTCD3        |
| ENSGALT00000023700 | DHX29    | ENSGALT00000025450 |              |
| ENSGALT00000023719 |          | ENSGALT00000012144 |              |
| ENSGALT00000000221 | CDS2     | ENSGALT00000003330 | NPRL2        |
| ENSGALT00000023723 | SLC38A9  | ENSGALT00000003543 |              |
| ENSGALT00000003725 |          | ENSGALT00000003585 | MAPKAP<br>K3 |
| ENSGALT00000003545 | ETF1     | ENSGALT00000025484 |              |
| ENSGALT00000014120 | RAPH1    | ENSGALT00000007525 | ULK2         |
| ENSGALT00000023728 |          | ENSGALT00000003737 |              |
| ENSGALT00000014182 | ABI2     | ENSGALT00000025489 |              |
| ENSGALT00000000227 |          | ENSGALT00000012866 |              |
| ENSGALT00000003489 |          | ENSGALT00000007598 |              |
| ENSGALT00000007996 |          | ENSGALT00000007650 | NXN          |
| ENSGALT00000014220 |          | ENSGALT00000023124 |              |
| ENSGALT00000014289 | NBEAL1   | ENSGALT00000013057 | COQ10B       |
| ENSGALT00000032871 | DIMT1    | ENSGALT00000025688 | THNSL2       |
| ENSGALT00000014333 | IDH1     | ENSGALT00000003723 | MANF         |
| ENSGALT00000014370 | PIKFYVE  | ENSGALT00000023128 |              |
| ENSGALT00000002866 |          | ENSGALT00000007703 | FAM57A       |
| ENSGALT00000008859 | DYNLL2   | ENSGALT00000025715 | EIF2AK3      |
| ENSGALT00000039052 |          | ENSGALT00000013202 |              |
| ENSGALT00000023780 | CWC27    | ENSGALT00000007801 |              |
| ENSGALT00000002683 | MAT2B    | ENSGALT00000032015 |              |
| ENSGALT00000002649 | NUDCD2   | ENSGALT00000003917 | RNF123       |
| ENSGALT00000002636 | CCNG1    | ENSGALT00000033513 | C2orf47      |
| ENSGALT00000023799 | PPWD1    | ENSGALT00000007833 | FAM101B      |
| ENSGALT00000023814 | TRIM23   | ENSGALT00000025750 | PANK2        |
| ENSGALT00000008944 | AKAP1    | ENSGALT00000025773 |              |
| ENSGALT00000008081 | IQSEC1   | ENSGALT00000003959 | IP6K1        |
| ENSGALT00000008142 | NUP210   | ENSGALT00000020313 |              |
| ENSGALT00000008222 | FBLN2    | ENSGALT00000033496 |              |
| ENSGALT00000023839 | SREK1    | ENSGALT00000003976 | CREB3        |
| ENSGALT00000023868 | PIK3R1   | ENSGALT00000013327 |              |
| ENSGALT00000008313 | FAM120A  | ENSGALT00000008115 | PPM1E        |
| ENSGALT00000023876 | CDK7     | ENSGALT00000004292 |              |
| ENSGALT00000001892 | PPARGC1B | ENSGALT00000034799 | PRR11        |

|                    |          |                    |               |
|--------------------|----------|--------------------|---------------|
| ENSGALT00000002082 |          | ENSGALT00000013401 |               |
| ENSGALT00000000362 |          | ENSGALT00000004064 |               |
| ENSGALT00000008368 | WNK2     | ENSGALT00000008166 |               |
| ENSGALT00000004213 | GRPEL2   | ENSGALT00000008181 | GDPD1         |
| ENSGALT00000001972 | CLIP2    | ENSGALT00000034416 | CA9           |
| ENSGALT00000008413 | FGD3     | ENSGALT00000025784 | UBOX5         |
| ENSGALT00000023888 | SERINC5  | ENSGALT00000013409 |               |
| ENSGALT00000004451 | STK10    | ENSGALT00000025775 | FASTKD5       |
| ENSGALT00000033324 |          | ENSGALT00000025781 |               |
| ENSGALT00000014643 |          | ENSGALT00000025785 | DDR GK1       |
| ENSGALT00000023911 | PAPD4    | ENSGALT00000008234 | DHX40         |
| ENSGALT00000007194 |          | ENSGALT00000013633 | TRAK2         |
| ENSGALT00000007151 | DMGDH    | ENSGALT00000013642 | STRADB        |
| ENSGALT00000004469 | SH3PXD2B | ENSGALT00000005129 | RAD54L2       |
| ENSGALT00000007061 | LHFPL2   | ENSGALT00000013654 | TMEM23<br>7   |
| ENSGALT00000007047 |          | ENSGALT00000005018 | MTMR12        |
| ENSGALT00000004489 | NEURL1B  | ENSGALT00000025803 | SLC4A11       |
| ENSGALT00000004517 | ERGIC1   | ENSGALT00000028093 | NPR3          |
| ENSGALT00000008433 | BICD2    | ENSGALT00000005219 | ADAMTS<br>12  |
| ENSGALT00000006998 | AP3B1    | ENSGALT00000008250 |               |
| ENSGALT00000014791 |          | ENSGALT00000013679 | MPP4          |
| ENSGALT00000008538 | DCP1A    | ENSGALT00000005305 | RAI14         |
| ENSGALT00000009090 |          | ENSGALT00000005353 | DNAJC21       |
| ENSGALT00000024118 | COL4A3BP | ENSGALT00000008286 | VMP1          |
| ENSGALT00000040996 | STC2     | ENSGALT00000025818 | C20orf19<br>4 |
| ENSGALT00000022788 | CPEB4    | ENSGALT00000025829 | ATRN          |
| ENSGALT00000024097 | GFM2     | ENSGALT00000005931 |               |
| ENSGALT00000024086 | HEXB     | ENSGALT00000034226 |               |
| ENSGALT00000008687 |          | ENSGALT00000006075 | TEX264        |
| ENSGALT00000008746 | CCDC66   | ENSGALT00000013707 | ALS2          |
| ENSGALT00000008882 | ASB14    | ENSGALT00000013744 |               |
| ENSGALT00000029725 |          | ENSGALT00000008348 |               |
| ENSGALT00000029777 |          | ENSGALT00000006367 |               |
| ENSGALT00000009143 | NLK      | ENSGALT00000008358 | RNFT1         |
| ENSGALT00000000518 | SLC25A37 | ENSGALT00000036280 |               |
| ENSGALT00000000531 | ENTPD4   | ENSGALT00000008405 | MED13         |
| ENSGALT00000009146 | TMEM97   | ENSGALT00000001111 |               |
| ENSGALT00000040958 |          | ENSGALT00000025839 |               |
| ENSGALT00000024194 | MRPS27   | ENSGALT00000025924 | PRADC1        |

|                    |          |                    |               |
|--------------------|----------|--------------------|---------------|
| ENSGALT00000024183 | PGM5     | ENSGALT00000008456 |               |
| ENSGALT00000000548 | LOXL2    | ENSGALT00000025927 | RAB11F1<br>P5 |
| ENSGALT00000016528 | SMARCA2  | ENSGALT00000005708 |               |
| ENSGALT00000016531 |          | ENSGALT00000025939 | EXOC6B        |
| ENSGALT00000023329 | AK3      | ENSGALT00000008492 | BCAS3         |
| ENSGALT00000009018 | PDE12    | ENSGALT00000007193 | PARP3         |
| ENSGALT00000009021 | ARF4     | ENSGALT00000013828 | CCNYL1        |
| ENSGALT00000040952 |          | ENSGALT00000005878 |               |
| ENSGALT00000024242 | CD274    | ENSGALT00000008517 |               |
| ENSGALT00000024250 | KIAA1432 | ENSGALT00000005924 |               |
| ENSGALT00000009362 | MNT      | ENSGALT00000008580 |               |
| ENSGALT00000009368 |          | ENSGALT00000005943 | OSMR          |
| ENSGALT00000009407 | CLUH     | ENSGALT00000001647 |               |
| ENSGALT00000009165 | NCKIPSD  | ENSGALT00000029609 |               |
| ENSGALT00000000956 | MYO1D    | ENSGALT00000023934 | TTC33         |
| ENSGALT00000040727 | PSMD11   | ENSGALT00000004187 |               |
| ENSGALT00000024268 | KIAA2026 | ENSGALT00000023947 | C7            |
| ENSGALT00000002766 |          | ENSGALT00000023962 | PLCXD3        |
| ENSGALT00000015032 | AGPS     | ENSGALT00000000026 | AAK1          |
| ENSGALT00000033290 |          | ENSGALT00000023976 |               |
| ENSGALT00000004794 |          | ENSGALT00000007426 |               |
| ENSGALT00000024372 |          | ENSGALT00000007467 |               |
| ENSGALT00000040680 | SCN4A    | ENSGALT00000023983 | C5orf28       |
| ENSGALT00000015075 | MTX2     | ENSGALT00000000046 |               |
| ENSGALT00000009300 | UQCRC1   | ENSGALT00000004015 | PCDH12        |
| ENSGALT00000009663 | MED31    | ENSGALT00000041239 | ECSCR         |
| ENSGALT00000024341 |          | ENSGALT00000007480 | ECM2          |
| ENSGALT00000009741 | FAM64A   | ENSGALT00000007519 | ASPN          |
| ENSGALT00000015103 | KIAA1715 | ENSGALT00000007571 | NOL8          |
| ENSGALT00000015106 |          | ENSGALT00000000136 | ANTXR1        |
| ENSGALT00000002520 | TTI2     | ENSGALT00000023988 | PAIP1         |
| ENSGALT00000038228 | FXN      | ENSGALT00000023990 | NNT           |
| ENSGALT00000009792 | SMTNL2   | ENSGALT00000023997 |               |
| ENSGALT00000024378 | FAM189A2 | ENSGALT00000032856 |               |
| ENSGALT00000002495 | DUSP26   | ENSGALT00000007684 | IARS          |
| ENSGALT00000024387 | MAMDC2   | ENSGALT00000003921 |               |
| ENSGALT00000022979 | GPR155   | ENSGALT00000024048 | ARL15         |
| ENSGALT00000001720 | ZNF346   | ENSGALT00000014015 |               |
| ENSGALT00000000469 | PSMC5    | ENSGALT00000003856 | CTNNA1        |
| ENSGALT00000024435 |          | ENSGALT00000023700 | DHX29         |
| ENSGALT00000015187 |          | ENSGALT00000023719 |               |

|                    |           |                    |              |
|--------------------|-----------|--------------------|--------------|
| ENSGALT00000015190 |           | ENSGALT00000000221 | CDS2         |
| ENSGALT00000015215 |           | ENSGALT00000023723 | SLC38A9      |
| ENSGALT00000021611 |           | ENSGALT00000003725 |              |
| ENSGALT00000021613 |           | ENSGALT00000003545 | ETF1         |
| ENSGALT00000000694 |           | ENSGALT00000014120 | RAPH1        |
| ENSGALT00000000731 |           | ENSGALT00000023728 |              |
| ENSGALT00000032821 |           | ENSGALT00000007902 |              |
| ENSGALT00000000739 | ERRFI1    | ENSGALT00000014182 | ABI2         |
| ENSGALT00000015508 |           | ENSGALT00000000227 |              |
| ENSGALT00000032816 | NMRK1     | ENSGALT00000023732 | MAP3K1       |
| ENSGALT00000015535 | SLC25A12  | ENSGALT00000003489 |              |
| ENSGALT00000000541 |           | ENSGALT00000007996 |              |
| ENSGALT00000000797 | PER3      | ENSGALT00000003449 |              |
| ENSGALT00000000559 | TLK2      | ENSGALT00000014220 |              |
| ENSGALT00000009434 |           | ENSGALT00000014289 | NBEAL1       |
| ENSGALT00000004898 | PROSC     | ENSGALT00000032871 | DIMT1        |
| ENSGALT00000009495 | RAB7A     | ENSGALT00000014333 | IDH1         |
| ENSGALT00000009501 | RPN1      | ENSGALT00000008038 |              |
| ENSGALT00000000891 | DNAJC11   | ENSGALT00000014370 | PIKFYVE      |
| ENSGALT00000000627 | MRC2      | ENSGALT00000002866 |              |
| ENSGALT00000015547 |           | ENSGALT00000008859 | DYNLL2       |
| ENSGALT00000015562 | DCAF17    | ENSGALT00000039052 |              |
| ENSGALT00000020544 | FRMD3     | ENSGALT00000039046 |              |
| ENSGALT00000020546 | IDNK      | ENSGALT00000023780 | CWC27        |
| ENSGALT00000030746 |           | ENSGALT00000002683 | MAT2B        |
| ENSGALT00000009510 | EEFSEC    | ENSGALT00000002649 | NUDCD2       |
| ENSGALT00000009542 |           | ENSGALT00000002636 | CCNG1        |
| ENSGALT00000020549 |           | ENSGALT00000023799 | PPWD1        |
| ENSGALT00000004947 | RAB11FIP1 | ENSGALT00000008930 | MSI2         |
| ENSGALT00000020552 | GKAP1     | ENSGALT00000000305 |              |
| ENSGALT00000009591 | SEC61A1   | ENSGALT00000008944 | AKAP1        |
| ENSGALT00000000901 | KLHL21    | ENSGALT00000002291 |              |
| ENSGALT00000009602 | KBTBD12   | ENSGALT00000008081 | IQSEC1       |
| ENSGALT00000005328 |           | ENSGALT00000008222 | FBLN2        |
| ENSGALT00000009651 |           | ENSGALT00000023839 | SREK1        |
| ENSGALT00000005077 | EIF4EBP1  | ENSGALT00000023868 | PIK3R1       |
| ENSGALT00000005337 | SIMC1     | ENSGALT00000002157 | ADRA1B       |
| ENSGALT00000000697 |           | ENSGALT00000008313 | FAM120A      |
| ENSGALT00000040847 |           | ENSGALT00000023876 | CDK7         |
| ENSGALT00000009723 |           | ENSGALT00000001892 | PPARGC<br>1B |
| ENSGALT00000020559 | C9orf64   | ENSGALT00000002082 |              |



|                    |          |                    |              |
|--------------------|----------|--------------------|--------------|
| ENSGALT00000015660 | UBR3     | ENSGALT00000000362 |              |
| ENSGALT00000009740 |          | ENSGALT00000008368 | WNK2         |
| ENSGALT00000020563 |          | ENSGALT00000004213 | GRPEL2       |
| ENSGALT00000009765 |          | ENSGALT00000001972 | CLIP2        |
| ENSGALT00000005847 | RNF145   | ENSGALT00000008413 | FGD3         |
| ENSGALT00000029074 |          | ENSGALT00000023888 | SERINC5      |
| ENSGALT00000009993 |          | ENSGALT00000004443 | UBTD2        |
| ENSGALT00000010098 | KLF15    | ENSGALT00000004451 | STK10        |
| ENSGALT00000010142 |          | ENSGALT00000033324 |              |
| ENSGALT00000015749 | METTL5   | ENSGALT00000014643 |              |
| ENSGALT00000020564 |          | ENSGALT00000007151 | DMGDH        |
| ENSGALT00000020572 |          | ENSGALT00000004469 | SH3PXD<br>2B |
| ENSGALT00000001006 | RNF207   | ENSGALT00000007061 | LHFPL2       |
| ENSGALT00000023340 | CHD5     | ENSGALT00000007047 |              |
| ENSGALT00000020577 | GOLM1    | ENSGALT00000004489 | NEURL1<br>B  |
| ENSGALT00000020582 |          | ENSGALT00000004517 | ERGIC1       |
| ENSGALT00000015791 | KLHL23   | ENSGALT00000008433 | BICD2        |
| ENSGALT00000001441 | C1orf174 | ENSGALT00000014694 | CCDC14<br>1  |
| ENSGALT00000010231 |          | ENSGALT00000006998 | AP3B1        |
| ENSGALT00000015973 | CCDC173  | ENSGALT00000006867 | AGGF1        |
| ENSGALT00000001448 | LRRC47   | ENSGALT00000008538 | DCP1A        |
| ENSGALT00000000783 | CCDC47   | ENSGALT00000009090 |              |
| ENSGALT00000010255 |          | ENSGALT00000038562 | F2RL2        |
| ENSGALT00000015996 | PPIG     | ENSGALT00000004538 |              |
| ENSGALT00000020588 |          | ENSGALT00000024118 | COL4A3B<br>P |
| ENSGALT00000020591 |          | ENSGALT00000008651 | ACTR8        |
| ENSGALT00000040509 |          | ENSGALT00000040996 | STC2         |
| ENSGALT00000001513 | TPRG1L   | ENSGALT00000022788 | CPEB4        |
| ENSGALT00000016007 |          | ENSGALT00000024097 | GFM2         |
| ENSGALT00000006182 | SGCD     | ENSGALT00000024086 | HEXB         |
| ENSGALT00000006244 | MRPL22   | ENSGALT00000008687 |              |
| ENSGALT00000006272 | GEMIN5   | ENSGALT00000008746 | CCDC66       |
| ENSGALT00000006374 | LARP1    | ENSGALT00000008805 |              |
| ENSGALT00000010371 |          | ENSGALT00000005114 |              |
| ENSGALT00000010411 |          | ENSGALT00000008882 | ASB14        |
| ENSGALT00000010440 | CCDC51   | ENSGALT00000029725 |              |
| ENSGALT00000006432 |          | ENSGALT00000029777 |              |
| ENSGALT00000020613 |          | ENSGALT00000009143 | NLK          |

|                    |           |                    |              |
|--------------------|-----------|--------------------|--------------|
| ENSGALT0000000842  | KANSL1    | ENSGALT0000000518  | SLC25A3<br>7 |
| ENSGALT00000034078 |           | ENSGALT0000000531  | ENTPD4       |
| ENSGALT00000040399 | SLC25A39  | ENSGALT00000009146 | TMEM97       |
| ENSGALT00000017380 | S1PR3     | ENSGALT00000040958 |              |
| ENSGALT00000016166 |           | ENSGALT00000024194 | MRPS27       |
| ENSGALT00000016165 | FAM117A   | ENSGALT00000009153 | IFT20        |
| ENSGALT00000006615 |           | ENSGALT00000001663 | GTSF1        |
| ENSGALT00000035387 |           | ENSGALT00000024183 | PGM5         |
| ENSGALT00000005308 | TM2D2     | ENSGALT00000000548 | LOXL2        |
| ENSGALT00000001855 |           | ENSGALT00000016528 | SMARCA<br>2  |
| ENSGALT00000021979 | SPTLC1    | ENSGALT00000016531 |              |
| ENSGALT00000000584 |           | ENSGALT00000016548 | RFX3         |
| ENSGALT00000000207 | ADAMTS19  | ENSGALT00000023329 | AK3          |
| ENSGALT00000005373 |           | ENSGALT00000009018 | PDE12        |
| ENSGALT00000010811 | TADA3     | ENSGALT00000009021 | ARF4         |
| ENSGALT00000001940 | C17orf105 | ENSGALT00000024230 | RCL1         |
| ENSGALT00000037896 |           | ENSGALT00000024242 | CD274        |
| ENSGALT00000010572 | SRPK3     | ENSGALT00000024250 | KIAA1432     |
| ENSGALT00000001986 | TMEM52    | ENSGALT00000009368 |              |
| ENSGALT00000006949 |           | ENSGALT00000009407 | CLUH         |
| ENSGALT00000006950 |           | ENSGALT00000001199 |              |
| ENSGALT00000010618 |           | ENSGALT00000014983 |              |
| ENSGALT00000001801 | DHX8      | ENSGALT00000000956 | MYO1D        |
| ENSGALT00000010655 | MTMR14    | ENSGALT00000040727 | PSMD11       |
| ENSGALT00000001955 | ZNF652    | ENSGALT00000024268 | KIAA2026     |
| ENSGALT00000001957 |           | ENSGALT00000002766 |              |
| ENSGALT00000001966 | ABI3      | ENSGALT00000015032 | AGPS         |
| ENSGALT00000035169 |           | ENSGALT00000033290 |              |
| ENSGALT00000002094 | SLC35E2B  | ENSGALT00000004794 |              |
| ENSGALT00000007164 | TNIP1     | ENSGALT00000024372 |              |
| ENSGALT00000001975 |           | ENSGALT00000040680 | SCN4A        |
| ENSGALT00000000332 |           | ENSGALT00000015075 | MTX2         |
| ENSGALT00000000334 | MAN2A1    | ENSGALT00000009300 | UQCRC1       |
| ENSGALT00000000365 | FBXL17    | ENSGALT00000009663 | MED31        |
| ENSGALT00000024619 | PAM       | ENSGALT00000024341 |              |
| ENSGALT00000002003 | UBE2Z     | ENSGALT00000009741 | FAM64A       |
| ENSGALT00000007219 | DCTN4     | ENSGALT00000015103 | KIAA1715     |
| ENSGALT00000010798 | CAMK1     | ENSGALT00000000004 |              |
| ENSGALT00000002119 | MMP23B    | ENSGALT00000015106 |              |
| ENSGALT00000005511 |           | ENSGALT00000038862 | FBXO39       |

|                    |         |                    |              |
|--------------------|---------|--------------------|--------------|
| ENSGALT0000007249  |         | ENSGALT00000038228 | FXN          |
| ENSGALT0000007258  | MYOZ3   | ENSGALT00000040669 | RCC2         |
| ENSGALT0000007290  | NDST1   | ENSGALT00000009792 | SMTNL2       |
| ENSGALT0000007299  |         | ENSGALT00000024378 | FAM189A<br>2 |
| ENSGALT0000007311  |         | ENSGALT00000002495 | DUSP26       |
| ENSGALT00000040533 |         | ENSGALT00000024387 | MAMDC2       |
| ENSGALT00000005561 | AGPAT6  | ENSGALT00000022979 | GPR155       |
| ENSGALT00000000312 | SP2     | ENSGALT00000001720 | ZNF346       |
| ENSGALT00000002248 |         | ENSGALT00000000469 | PSMC5        |
| ENSGALT00000024669 | RGMB    | ENSGALT00000023090 |              |
| ENSGALT00000009192 | PDGFRB  | ENSGALT00000024435 |              |
| ENSGALT00000009190 | CSF1R   | ENSGALT00000015187 |              |
| ENSGALT00000009267 | HMGXB3  | ENSGALT00000015190 |              |
| ENSGALT00000010963 | KLHDC8B | ENSGALT00000015215 |              |
| ENSGALT00000024694 | LNPEP   | ENSGALT00000021611 |              |
| ENSGALT00000024714 | RNF38   | ENSGALT00000021613 |              |
| ENSGALT00000005683 |         | ENSGALT00000000694 |              |
| ENSGALT00000024737 |         | ENSGALT00000000731 |              |
| ENSGALT00000036239 |         | ENSGALT00000015487 | METAP1<br>D  |
| ENSGALT00000024770 | PIGG    | ENSGALT00000032821 |              |
| ENSGALT00000024799 |         | ENSGALT00000000739 | ERRF1        |
| ENSGALT00000002392 | MLLT6   | ENSGALT00000015508 |              |
| ENSGALT00000011032 | USP19   | ENSGALT00000015535 | SLC25A1<br>2 |
| ENSGALT00000002321 | VWA1    | ENSGALT00000000541 |              |
| ENSGALT00000002423 | PSMB3   | ENSGALT00000000797 | PER3         |
| ENSGALT00000018083 |         | ENSGALT00000009434 |              |
| ENSGALT00000002452 | PIP4K2B | ENSGALT00000004898 | PROSC        |
| ENSGALT00000011121 | QRICH1  | ENSGALT00000009495 | RAB7A        |
| ENSGALT00000009349 | RNF130  | ENSGALT00000009501 | RPN1         |
| ENSGALT00000002480 | CWC25   | ENSGALT00000000891 | DNAJC11      |
| ENSGALT00000002426 |         | ENSGALT00000000627 | MRC2         |
| ENSGALT00000005799 | AP3M2   | ENSGALT00000015547 |              |
| ENSGALT00000017943 |         | ENSGALT00000024492 |              |
| ENSGALT00000036016 |         | ENSGALT00000020544 | FRMD3        |
| ENSGALT00000009410 | TBC1D9B | ENSGALT00000020546 | IDNK         |
| ENSGALT00000011269 |         | ENSGALT00000030746 |              |
| ENSGALT00000005886 | PLAT    | ENSGALT00000009510 | EEFSEC       |
| ENSGALT00000002516 |         | ENSGALT00000009542 |              |
| ENSGALT00000011358 | PRKAR2A | ENSGALT00000020549 |              |

|                    |         |                     |               |
|--------------------|---------|---------------------|---------------|
| ENSGALT00000024832 |         | ENSGALT00000004947  | RAB11FI<br>P1 |
| ENSGALT00000024838 |         | ENSGALT00000020552  | GKAP1         |
| ENSGALT00000040133 | PLXDC1  | ENSGALT00000005307  | NOP16         |
| ENSGALT00000037774 |         | ENSGALT00000009591  | SEC61A1       |
| ENSGALT00000024886 | PSD3    | ENSGALT00000000901  | KLHL21        |
| ENSGALT00000033434 | RPP14   | ENSGALT00000009602  | KBTBD12       |
| ENSGALT00000029612 | VDAC3   | ENSGALT00000005328  |               |
| ENSGALT00000009500 | SQSTM1  | ENSGALT00000009651  |               |
| ENSGALT00000011505 |         | ENSGALT00000005077  | EIF4EBP<br>1  |
| ENSGALT00000024902 | SLC44A1 | ENSGALT00000005337  | SIMC1         |
| ENSGALT00000002573 | FBXL20  | ENSGALT00000000697  |               |
| ENSGALT00000002657 | CDK12   | ENSGALT000000040847 |               |
| ENSGALT00000023556 | STARD3  | ENSGALT00000009723  |               |
| ENSGALT00000024907 | FKTN    | ENSGALT00000020559  | C9orf64       |
| ENSGALT00000002864 | UBE2J2  | ENSGALT00000015660  | UBR3          |
| ENSGALT00000011518 | KCTD6   | ENSGALT00000020563  |               |
| ENSGALT00000011555 | ACOX2   | ENSGALT00000009765  |               |
| ENSGALT00000025051 | RAD23B  | ENSGALT00000005847  | RNF145        |
| ENSGALT00000009539 | MAML1   | ENSGALT00000009993  |               |
| ENSGALT00000002907 |         | ENSGALT00000010098  | KLF15         |
| ENSGALT00000023458 | KANSL3  | ENSGALT00000010121  | CCDC37        |
| ENSGALT00000000352 |         | ENSGALT00000010142  |               |
| ENSGALT00000009585 |         | ENSGALT00000015749  | METTL5        |
| ENSGALT00000011619 |         | ENSGALT00000005940  |               |
| ENSGALT00000029130 |         | ENSGALT00000020569  | AGTPBP<br>1   |
| ENSGALT00000023663 | ERAP1   | ENSGALT00000020572  |               |
| ENSGALT00000033125 |         | ENSGALT00000023340  | CHD5          |
| ENSGALT00000011817 |         | ENSGALT00000020577  | GOLM1         |
| ENSGALT00000003315 | PLEKHN1 | ENSGALT00000020582  |               |
| ENSGALT00000023641 | TTC37   | ENSGALT00000001441  | C1orf174      |
| ENSGALT00000009653 | ADAMTS2 | ENSGALT00000010231  |               |
| ENSGALT00000009661 |         | ENSGALT00000015973  | CCDC17<br>3   |
| ENSGALT00000009699 | CNOT6   | ENSGALT00000001448  | LRRC47        |
| ENSGALT00000022352 | GFPT2   | ENSGALT00000000783  | CCDC47        |
| ENSGALT00000033111 |         | ENSGALT00000010255  |               |
| ENSGALT00000009806 |         | ENSGALT00000015996  | PPIG          |
| ENSGALT00000012074 |         | ENSGALT00000020588  |               |
| ENSGALT00000023233 |         | ENSGALT00000020591  |               |

|                    |          |                    |               |
|--------------------|----------|--------------------|---------------|
| ENSGALT0000003902  | GPR157   | ENSGALT0000001513  | TPRG1L        |
| ENSGALT00000012239 | KBTBD8   | ENSGALT00000016000 | FASTKD1       |
| ENSGALT00000012394 |          | ENSGALT00000016007 |               |
| ENSGALT00000028102 |          | ENSGALT00000006159 | MED7          |
| ENSGALT00000003951 | SPSB1    | ENSGALT00000028046 |               |
| ENSGALT00000003969 | SLC25A33 | ENSGALT00000006182 | SGCD          |
| ENSGALT00000005592 | KLHL11   | ENSGALT00000006244 | MRPL22        |
| ENSGALT00000005478 |          | ENSGALT00000006272 | GEMIN5        |
| ENSGALT00000005463 |          | ENSGALT00000006297 |               |
| ENSGALT00000003980 | TMEM201  | ENSGALT00000006374 | LARP1         |
| ENSGALT00000025199 | EDIL3    | ENSGALT00000005246 |               |
| ENSGALT00000005381 | ZNF385C  | ENSGALT00000010371 |               |
| ENSGALT00000021871 | TMF1     | ENSGALT00000010411 |               |
| ENSGALT00000005327 | KAT2A    | ENSGALT00000010440 | CCDC51        |
| ENSGALT00000037654 | SSBP2    | ENSGALT00000006422 | GALNT10       |
| ENSGALT00000025157 | ZCCHC9   | ENSGALT00000006432 |               |
| ENSGALT00000004118 |          | ENSGALT00000000842 | KANSL1        |
| ENSGALT00000032786 |          | ENSGALT00000040399 | SLC25A3<br>9  |
| ENSGALT00000003806 | GMPPA    | ENSGALT00000017380 | S1PR3         |
| ENSGALT00000010215 |          | ENSGALT00000016166 |               |
| ENSGALT00000004175 | UBE4B    | ENSGALT00000016165 | FAM117A       |
| ENSGALT00000022506 |          | ENSGALT00000006615 |               |
| ENSGALT00000028126 |          | ENSGALT00000006650 |               |
| ENSGALT00000023578 | FRMD4B   | ENSGALT00000035387 |               |
| ENSGALT00000040187 |          | ENSGALT00000005308 | TM2D2         |
| ENSGALT00000012448 |          | ENSGALT00000001855 |               |
| ENSGALT00000022505 | PCYOX1   | ENSGALT00000021979 | SPTLC1        |
| ENSGALT00000010230 |          | ENSGALT00000000584 |               |
| ENSGALT00000010280 |          | ENSGALT00000000207 | ADAMTS<br>19  |
| ENSGALT00000025119 |          | ENSGALT00000005373 |               |
| ENSGALT00000005164 |          | ENSGALT00000010811 | TADA3         |
| ENSGALT00000018464 |          | ENSGALT00000001940 | C17orf10<br>5 |
| ENSGALT00000025117 | ZFYVE16  | ENSGALT00000000276 | MCC           |
| ENSGALT00000013374 | ANXA4    | ENSGALT00000037896 |               |
| ENSGALT00000018446 | DES      | ENSGALT00000010572 | SRPK3         |
| ENSGALT00000034107 | TXNDC15  | ENSGALT00000001986 | TMEM52        |
| ENSGALT00000010339 | DDX46    | ENSGALT00000006949 |               |
| ENSGALT00000010356 | SEC24A   | ENSGALT00000006950 |               |
| ENSGALT00000012660 | GXYLT2   | ENSGALT00000010618 |               |

|                    |          |                    |              |
|--------------------|----------|--------------------|--------------|
| ENSGALT0000004300  | KIF1B    | ENSGALT0000001801  | DHX8         |
| ENSGALT00000033329 | PPP4R2   | ENSGALT00000010655 | MTMR14       |
| ENSGALT00000032789 |          | ENSGALT00000001955 | ZNF652       |
| ENSGALT00000037640 |          | ENSGALT00000001957 |              |
| ENSGALT00000004476 | PEX14    | ENSGALT00000001966 | ABI3         |
| ENSGALT00000004554 | CASZ1    | ENSGALT00000035169 |              |
| ENSGALT00000018477 |          | ENSGALT00000002094 | SLC35E2<br>B |
| ENSGALT00000029510 |          | ENSGALT00000007164 | TNIP1        |
| ENSGALT00000025065 |          | ENSGALT00000001975 |              |
| ENSGALT00000022896 | NUDCD3   | ENSGALT00000000323 | CAMK4        |
| ENSGALT00000025056 |          | ENSGALT00000017724 |              |
| ENSGALT00000010437 |          | ENSGALT00000000332 |              |
| ENSGALT00000004808 | SRM      | ENSGALT00000000334 | MAN2A1       |
| ENSGALT00000010461 |          | ENSGALT00000000365 | FBXL17       |
| ENSGALT00000025241 |          | ENSGALT00000024619 | PAM          |
| ENSGALT00000010508 |          | ENSGALT00000002003 | UBE2Z        |
| ENSGALT00000010517 |          | ENSGALT00000007219 | DCTN4        |
| ENSGALT00000005284 | MTOR     | ENSGALT00000002119 | MMP23B       |
| ENSGALT00000035033 | ANGPTL7  | ENSGALT00000002317 | CALCOC<br>O2 |
| ENSGALT00000004844 | EZH1     | ENSGALT00000001947 | HOXB9        |
| ENSGALT00000005311 |          | ENSGALT00000005511 |              |
| ENSGALT00000005447 | PLEKHM2  | ENSGALT00000007249 |              |
| ENSGALT00000025254 | HSDL2    | ENSGALT00000028252 |              |
| ENSGALT00000025295 | UGCG     | ENSGALT00000007258 | MYOZ3        |
| ENSGALT00000025297 |          | ENSGALT00000007290 | NDST1        |
| ENSGALT00000025304 | KIAA0368 | ENSGALT00000007299 |              |
| ENSGALT00000028052 | TRNT1    | ENSGALT00000005561 | AGPAT6       |
| ENSGALT00000013466 | CRBN     | ENSGALT00000000312 | SP2          |
| ENSGALT00000005919 | FBXO42   | ENSGALT00000002304 |              |
| ENSGALT00000025350 | SVEP1    | ENSGALT00000024669 | RGMB         |
| ENSGALT00000005941 |          | ENSGALT00000009192 | PDGFRB       |
| ENSGALT00000013524 |          | ENSGALT00000009190 | CSF1R        |
| ENSGALT00000013532 |          | ENSGALT00000009267 | HMGXB3       |
| ENSGALT00000010763 |          | ENSGALT00000024694 | LNPEP        |
| ENSGALT00000025366 |          | ENSGALT00000024714 | RNF38        |
| ENSGALT00000032768 | TOPORS   | ENSGALT00000005683 |              |
| ENSGALT00000013590 | LMCD1    | ENSGALT00000024737 |              |
| ENSGALT00000013623 |          | ENSGALT00000024747 | PCGF3        |
| ENSGALT00000018495 | FAM134A  | ENSGALT00000036239 |              |
| ENSGALT00000002709 | CAAP1    | ENSGALT00000024770 | PIGG         |

|                    |         |                    |             |
|--------------------|---------|--------------------|-------------|
| ENSGALT0000004510  | RUNDC1  | ENSGALT00000024799 |             |
| ENSGALT0000002747  | PLAA    | ENSGALT0000002392  | MLLT6       |
| ENSGALT0000002845  | TEK     | ENSGALT00000011032 | USP19       |
| ENSGALT00000039748 |         | ENSGALT00000002321 | VWA1        |
| ENSGALT0000002894  | C9orf72 | ENSGALT00000002423 | PSMB3       |
| ENSGALT00000036208 |         | ENSGALT00000018083 |             |
| ENSGALT00000004453 | VAT1    | ENSGALT00000002452 | PIP4K2B     |
| ENSGALT00000010935 |         | ENSGALT00000011121 | QRICH1      |
| ENSGALT00000004366 | NBR1    | ENSGALT00000009349 | RNF130      |
| ENSGALT00000013700 |         | ENSGALT00000002480 | CWC25       |
| ENSGALT00000013715 |         | ENSGALT00000002426 |             |
| ENSGALT00000037566 |         | ENSGALT00000005799 | AP3M2       |
| ENSGALT00000003135 |         | ENSGALT00000036016 |             |
| ENSGALT00000003899 | CYP27A1 | ENSGALT00000009410 | TBC1D9B     |
| ENSGALT00000013770 | IFT122  | ENSGALT00000011269 |             |
| ENSGALT00000006036 |         | ENSGALT00000005886 | PLAT        |
| ENSGALT00000013808 | PLXND1  | ENSGALT00000002516 |             |
| ENSGALT00000006223 | UBR4    | ENSGALT00000011358 | PRKAR2<br>A |
| ENSGALT00000013831 | TMCC1   | ENSGALT00000024832 |             |
| ENSGALT00000036642 |         | ENSGALT00000040133 | PLXDC1      |
| ENSGALT00000003255 |         | ENSGALT00000002630 |             |
| ENSGALT00000011543 | AFF4    | ENSGALT00000037774 |             |
| ENSGALT00000013922 | FGD5    | ENSGALT00000002716 | ACAP3       |
| ENSGALT00000003386 |         | ENSGALT00000024886 | PSD3        |
| ENSGALT00000003423 |         | ENSGALT00000033434 | RPP14       |
| ENSGALT00000011833 |         | ENSGALT00000029612 | VDAC3       |
| ENSGALT00000006321 |         | ENSGALT00000009500 | SQSTM1      |
| ENSGALT00000003649 |         | ENSGALT00000011505 |             |
| ENSGALT00000011880 |         | ENSGALT00000024902 | SLC44A1     |
| ENSGALT00000003696 | ATG12   | ENSGALT00000002573 | FBXL20      |
| ENSGALT00000011962 |         | ENSGALT00000002623 | MED1        |
| ENSGALT00000011976 |         | ENSGALT00000002657 | CDK12       |
| ENSGALT00000003718 | CDO1    | ENSGALT00000023556 | STARD3      |
| ENSGALT00000012177 | TCERG1  | ENSGALT00000024907 | FKTN        |
| ENSGALT00000003821 |         | ENSGALT00000002864 | UBE2J2      |
| ENSGALT00000034531 |         | ENSGALT00000011518 | KCTD6       |
| ENSGALT00000003846 | BDP1    | ENSGALT00000011555 | ACOX2       |
| ENSGALT00000003983 | MCCC2   | ENSGALT00000025051 | RAD23B      |
| ENSGALT00000018650 | TMBIM1  | ENSGALT00000009539 | MAML1       |
| ENSGALT00000012363 |         | ENSGALT00000002907 |             |
| ENSGALT00000018675 |         | ENSGALT00000023458 | KANSL3      |

|                    |         |                    |              |
|--------------------|---------|--------------------|--------------|
| ENSGALT0000006425  |         | ENSGALT00000023680 |              |
| ENSGALT00000012431 |         | ENSGALT00000009585 |              |
| ENSGALT00000039619 |         | ENSGALT00000023694 | MEGF10       |
| ENSGALT00000038163 |         | ENSGALT00000011619 |              |
| ENSGALT00000004909 | PINK1   | ENSGALT00000029130 |              |
| ENSGALT00000022237 |         | ENSGALT00000023663 | ERAP1        |
| ENSGALT00000013288 |         | ENSGALT00000006746 | STAMPB       |
| ENSGALT00000013361 | FEM1C   | ENSGALT00000033125 |              |
| ENSGALT00000013392 | ALDH7A1 | ENSGALT00000011817 |              |
| ENSGALT00000018820 |         | ENSGALT00000023641 | TTC37        |
| ENSGALT00000018822 |         | ENSGALT00000003479 |              |
| ENSGALT00000018925 |         | ENSGALT00000011836 | PSMD6        |
| ENSGALT00000008552 | SNCAIP  | ENSGALT00000009653 | ADAMTS<br>2  |
| ENSGALT00000029784 |         | ENSGALT00000009699 | CNOT6        |
| ENSGALT00000008572 | PPIC    | ENSGALT00000022352 | GFPT2        |
| ENSGALT00000008658 | DCAF10  | ENSGALT00000033111 |              |
| ENSGALT00000008663 | POLR1E  | ENSGALT00000009806 |              |
| ENSGALT00000019039 | NIFK    | ENSGALT00000018214 |              |
| ENSGALT00000008587 | ZBTB5   | ENSGALT00000012074 |              |
| ENSGALT00000019041 |         | ENSGALT00000023233 |              |
| ENSGALT00000019048 | IQCB1   | ENSGALT00000003902 | GPR157       |
| ENSGALT00000019090 | DIRC2   | ENSGALT00000012239 | KBTBD8       |
| ENSGALT00000019105 | SEMA5B  | ENSGALT00000028102 |              |
| ENSGALT00000019110 | PDIA5   | ENSGALT00000003951 | SPSB1        |
| ENSGALT00000019136 |         | ENSGALT00000003969 | SLC25A3<br>3 |
| ENSGALT00000019216 |         | ENSGALT00000018346 |              |
| ENSGALT00000019224 |         | ENSGALT00000005592 | KLHL11       |
| ENSGALT00000019286 | HEG1    | ENSGALT00000005478 |              |
| ENSGALT00000007199 | MFN2    | ENSGALT00000005463 |              |
| ENSGALT00000007216 |         | ENSGALT00000003980 | TMEM20<br>1  |
| ENSGALT00000019689 | SNX4    | ENSGALT00000005381 | ZNF385C      |
| ENSGALT00000007303 | CLCN6   | ENSGALT00000021871 | TMF1         |
| ENSGALT00000019698 | OSBPL11 | ENSGALT00000005327 | KAT2A        |
| ENSGALT00000007342 | MTHFR   | ENSGALT00000037654 | SSBP2        |
| ENSGALT00000007392 |         | ENSGALT00000025157 | ZCCHC9       |
| ENSGALT00000032941 |         | ENSGALT00000004118 |              |
| ENSGALT00000007609 | C1QB    | ENSGALT00000032786 |              |
| ENSGALT00000007608 | C1QA    | ENSGALT00000005294 |              |
| ENSGALT00000019870 | SLC35F5 | ENSGALT00000003806 | GMPPA        |



|                    |          |                    |             |
|--------------------|----------|--------------------|-------------|
| ENSGALT00000019898 | MGAT5    | ENSGALT00000005275 | GHDC        |
| ENSGALT00000034897 |          | ENSGALT00000010215 |             |
| ENSGALT00000019996 | R3HDM1   | ENSGALT00000004175 | UBE4B       |
| ENSGALT00000007741 |          | ENSGALT00000022506 |             |
| ENSGALT00000020021 | UBXN4    | ENSGALT00000028126 |             |
| ENSGALT00000007793 | PPCS     | ENSGALT00000023578 | FRMD4B      |
| ENSGALT00000008337 | ANKRD13A | ENSGALT00000040187 |             |
| ENSGALT00000030001 |          | ENSGALT00000012448 |             |
| ENSGALT00000020181 |          | ENSGALT00000022505 | PCYOX1      |
| ENSGALT00000020209 |          | ENSGALT00000010230 |             |
| ENSGALT00000032903 |          | ENSGALT00000010280 |             |
| ENSGALT00000022876 |          | ENSGALT00000025119 |             |
| ENSGALT00000016382 |          | ENSGALT00000005164 |             |
| ENSGALT00000029632 | DDI2     | ENSGALT00000018464 |             |
| ENSGALT00000020351 | MBD5     | ENSGALT00000025117 | ZFYVE16     |
| ENSGALT00000020382 |          | ENSGALT00000013374 | ANXA4       |
| ENSGALT00000029274 |          | ENSGALT00000018446 | DES         |
| ENSGALT00000020391 |          | ENSGALT00000034107 | TXNDC1<br>5 |
| ENSGALT00000020417 |          | ENSGALT00000010339 | DDX46       |
| ENSGALT00000004115 |          | ENSGALT00000010356 | SEC24A      |
| ENSGALT00000020434 | ARL5A    | ENSGALT00000004988 |             |
| ENSGALT00000037747 | PRPF40A  | ENSGALT00000012660 | GXYLT2      |
| ENSGALT00000020486 | GPD2     | ENSGALT00000004300 | KIF1B       |
| ENSGALT00000020497 |          | ENSGALT00000033329 | PPP4R2      |
| ENSGALT00000020547 | MARCH7   | ENSGALT00000032789 |             |
| ENSGALT00000001983 |          | ENSGALT00000004426 |             |
| ENSGALT00000001997 |          | ENSGALT00000004455 | DFFA        |
| ENSGALT00000023409 |          | ENSGALT00000004476 | PEX14       |
| ENSGALT00000002123 | SERPIND1 | ENSGALT00000004554 | CASZ1       |
| ENSGALT00000002184 |          | ENSGALT00000018477 |             |
| ENSGALT00000002361 |          | ENSGALT00000029510 |             |
| ENSGALT00000001634 |          | ENSGALT00000025065 |             |
| ENSGALT00000003148 | COMT     | ENSGALT00000022896 | NUDCD3      |
| ENSGALT00000003199 |          | ENSGALT00000025056 |             |
| ENSGALT00000003320 |          | ENSGALT00000010437 |             |
| ENSGALT00000003339 | PGAM5    | ENSGALT00000004808 | SRM         |
| ENSGALT00000003358 | ANKLE2   | ENSGALT00000010461 |             |
| ENSGALT00000003414 | CHFR     | ENSGALT00000010508 |             |
| ENSGALT00000003714 | PUS1     | ENSGALT00000010517 |             |
| ENSGALT00000003784 | ULK1     | ENSGALT00000025246 | SNX30       |
| ENSGALT00000003883 | MMP17    | ENSGALT00000005284 | MTOR        |

|                    |         |                    |             |
|--------------------|---------|--------------------|-------------|
| ENSGALT00000003918 | SFSWAP  | ENSGALT00000035033 | ANGPTL<br>7 |
| ENSGALT00000004249 | SLC15A4 | ENSGALT00000004844 | EZH1        |
| ENSGALT00000004598 |         | ENSGALT00000005311 |             |
| ENSGALT00000004770 | SCARB1  | ENSGALT00000005447 | PLEKHM<br>2 |
| ENSGALT00000004933 | NCOR2   | ENSGALT00000025254 | HSDL2       |
| ENSGALT00000005063 |         | ENSGALT00000025295 | UGCG        |
| ENSGALT00000005224 |         | ENSGALT00000025296 |             |
| ENSGALT00000005240 |         | ENSGALT00000025297 |             |
| ENSGALT00000005250 |         | ENSGALT00000025304 | KIAA0368    |
| ENSGALT00000005393 |         | ENSGALT00000028052 | TRNT1       |
| ENSGALT00000005860 |         | ENSGALT00000013466 | CRBN        |
| ENSGALT00000005939 | VPS37B  | ENSGALT00000025324 |             |
| ENSGALT00000006066 | ANAPC7  | ENSGALT00000005919 | FBXO42      |
| ENSGALT00000006657 |         | ENSGALT00000025350 | SVEP1       |
| ENSGALT00000001861 | PIK3R6  | ENSGALT00000005941 |             |
| ENSGALT00000026506 | HSF1    | ENSGALT00000013524 |             |
| ENSGALT00000000353 | C2CD2L  | ENSGALT00000013532 |             |
| ENSGALT00000007010 | MLXIP   | ENSGALT00000010797 |             |
| ENSGALT00000000380 | HMBS    | ENSGALT00000025366 |             |
| ENSGALT00000007031 | DIABLO  | ENSGALT00000032768 | TOPORS      |
| ENSGALT00000000393 | VPS11   | ENSGALT00000013590 | LMCD1       |
| ENSGALT00000000417 | SIK2    | ENSGALT00000013599 |             |
| ENSGALT00000007244 | PPTC7   | ENSGALT00000013623 |             |
| ENSGALT00000007277 |         | ENSGALT00000018495 | FAM134A     |
| ENSGALT00000035085 |         | ENSGALT00000004510 | RUNDC1      |
| ENSGALT00000000486 |         | ENSGALT00000002747 | PLAA        |
| ENSGALT00000001417 | PUS3    | ENSGALT00000002781 | IFT74       |
| ENSGALT00000000525 | DHDDS   | ENSGALT00000002845 | TEK         |
| ENSGALT00000001501 |         | ENSGALT00000002894 | C9orf72     |
| ENSGALT00000007523 |         | ENSGALT00000036208 |             |
| ENSGALT00000001579 |         | ENSGALT00000004453 | VAT1        |
| ENSGALT00000000760 | CNKSR1  | ENSGALT00000010935 |             |
| ENSGALT00000001619 | DCPS    | ENSGALT00000004366 | NBR1        |
| ENSGALT00000000781 | LAPTM5  | ENSGALT00000013700 |             |
| ENSGALT00000001710 |         | ENSGALT00000013715 |             |
| ENSGALT00000001717 |         | ENSGALT00000037566 |             |
| ENSGALT00000007562 |         | ENSGALT00000003135 |             |
| ENSGALT00000001790 | KCNJ5   | ENSGALT00000003899 | CYP27A1     |
| ENSGALT00000001814 |         | ENSGALT00000013770 | IFT122      |
| ENSGALT00000000876 |         | ENSGALT00000029706 |             |

|                    |          |                    |              |
|--------------------|----------|--------------------|--------------|
| ENSGALT0000001897  |          | ENSGALT00000006036 |              |
| ENSGALT00000035194 |          | ENSGALT00000013808 | PLXND1       |
| ENSGALT0000001951  | PRDM10   | ENSGALT00000006223 | UBR4         |
| ENSGALT0000001988  |          | ENSGALT00000013831 | TMCC1        |
| ENSGALT0000000949  | SCMH1    | ENSGALT00000036642 |              |
| ENSGALT0000002027  | ST14     | ENSGALT00000003255 |              |
| ENSGALT00000038999 |          | ENSGALT00000011543 | AFF4         |
| ENSGALT0000000957  | CTPS1    | ENSGALT00000003296 | TSTD2        |
| ENSGALT0000001016  |          | ENSGALT00000013922 | FGD5         |
| ENSGALT00000010016 |          | ENSGALT00000018542 | TTLL4        |
| ENSGALT00000002047 | ZBTB44   | ENSGALT00000003386 |              |
| ENSGALT00000002056 |          | ENSGALT00000003423 |              |
| ENSGALT00000002090 | ADAMTS8  | ENSGALT00000011833 |              |
| ENSGALT00000022093 | SENP1    | ENSGALT00000003628 |              |
| ENSGALT0000001026  | STX12    | ENSGALT00000006321 |              |
| ENSGALT00000002140 | ADAMTS15 | ENSGALT00000018598 |              |
| ENSGALT0000001032  |          | ENSGALT00000003696 | ATG12        |
| ENSGALT00000023447 | HECTD4   | ENSGALT00000011962 |              |
| ENSGALT00000001127 |          | ENSGALT00000011976 |              |
| ENSGALT00000002230 | JAM3     | ENSGALT00000012114 | LARS         |
| ENSGALT00000002312 | VPS26B   | ENSGALT00000012177 | TCERG1       |
| ENSGALT00000002324 |          | ENSGALT00000003821 |              |
| ENSGALT0000001233  | KDM1A    | ENSGALT00000034531 |              |
| ENSGALT00000002863 |          | ENSGALT00000003846 | BDP1         |
| ENSGALT00000002903 |          | ENSGALT00000003983 | MCCC2        |
| ENSGALT0000001253  | ZMPSTE24 | ENSGALT00000018650 | TMBIM1       |
| ENSGALT00000007760 | FICD     | ENSGALT00000012363 |              |
| ENSGALT00000003079 | LDB3     | ENSGALT00000018675 |              |
| ENSGALT00000010494 | GRAMD1B  | ENSGALT00000006425 |              |
| ENSGALT00000003119 |          | ENSGALT00000006424 |              |
| ENSGALT00000010518 | CLMP     | ENSGALT00000039619 |              |
| ENSGALT00000003144 |          | ENSGALT00000038163 |              |
| ENSGALT00000003257 |          | ENSGALT00000004909 | PINK1        |
| ENSGALT00000010602 | UBASH3B  | ENSGALT00000022237 |              |
| ENSGALT00000007773 | ISCU     | ENSGALT00000018709 | SMARCA<br>L1 |
| ENSGALT00000001788 |          | ENSGALT00000013288 |              |
| ENSGALT00000001834 | PPP2R3A  | ENSGALT00000018729 | XRCC5        |
| ENSGALT00000001317 |          | ENSGALT00000013349 | PGGT1B       |
| ENSGALT00000041155 | FAM46B   | ENSGALT00000013361 | FEM1C        |
| ENSGALT00000001355 |          | ENSGALT00000013392 | ALDH7A1      |
| ENSGALT00000001392 | WDTC1    | ENSGALT00000018820 |              |

|                    |            |                    |              |
|--------------------|------------|--------------------|--------------|
| ENSGALT00000010780 | ARHGEF12   | ENSGALT00000018822 |              |
| ENSGALT00000034383 |            | ENSGALT00000008519 | SRFBP1       |
| ENSGALT00000001409 | TMEM222    | ENSGALT00000008552 | SNCAIP       |
| ENSGALT00000003816 |            | ENSGALT00000029784 |              |
| ENSGALT00000010901 | PVRL1      | ENSGALT00000008572 | PPIC         |
| ENSGALT00000003908 |            | ENSGALT00000008658 | DCAF10       |
| ENSGALT00000040822 |            | ENSGALT00000018997 | RALB         |
| ENSGALT00000010949 |            | ENSGALT00000008663 | POLR1E       |
| ENSGALT00000022698 | WASF2      | ENSGALT00000019039 | NIFK         |
| ENSGALT00000004014 | CSGALNACT2 | ENSGALT00000008587 | ZBTB5        |
| ENSGALT00000004133 | BMS1       | ENSGALT00000019041 |              |
| ENSGALT00000034212 |            | ENSGALT00000008724 |              |
| ENSGALT00000004154 |            | ENSGALT00000019090 | DIRC2        |
| ENSGALT00000041354 |            | ENSGALT00000019105 | SEMA5B       |
| ENSGALT00000004232 |            | ENSGALT00000019110 | PDIA5        |
| ENSGALT00000004246 | FAM149B1   | ENSGALT00000019136 |              |
| ENSGALT00000001414 | YTHDF2     | ENSGALT00000019216 |              |
| ENSGALT00000034167 |            | ENSGALT00000019224 |              |
| ENSGALT00000004265 |            | ENSGALT00000019286 | HEG1         |
| ENSGALT00000001474 | MTFR1L     | ENSGALT00000007199 | MFN2         |
| ENSGALT00000040809 |            | ENSGALT00000007216 |              |
| ENSGALT00000001481 |            | ENSGALT00000019689 | SNX4         |
| ENSGALT00000011217 |            | ENSGALT00000007303 | CLCN6        |
| ENSGALT00000011287 |            | ENSGALT00000019698 | OSBPL11      |
| ENSGALT00000001539 | MAN1C1     | ENSGALT00000007342 | MTHFR        |
| ENSGALT00000002654 | DGKD       | ENSGALT00000007392 |              |
| ENSGALT00000004359 |            | ENSGALT00000032941 |              |
| ENSGALT00000001574 | LDLRAP1    | ENSGALT00000007609 | C1QB         |
| ENSGALT00000004372 |            | ENSGALT00000007608 | C1QA         |
| ENSGALT00000011346 | ZBTB16     | ENSGALT00000019870 | SLC35F5      |
| ENSGALT00000011352 |            | ENSGALT00000019884 | NCKAP5       |
| ENSGALT00000004487 |            | ENSGALT00000019898 | MGAT5        |
| ENSGALT00000011363 |            | ENSGALT00000034897 |              |
| ENSGALT00000004583 |            | ENSGALT00000007659 | C1orf50      |
| ENSGALT00000001870 |            | ENSGALT00000019996 | R3HDM1       |
| ENSGALT00000023514 | CADM1      | ENSGALT00000007741 |              |
| ENSGALT00000001916 | CLIC4      | ENSGALT00000020021 | UBXN4        |
| ENSGALT00000008249 | KCTD10     | ENSGALT00000007793 | PPCS         |
| ENSGALT00000001994 | TRNAU1AP   | ENSGALT00000008337 | ANKRD1<br>3A |
| ENSGALT00000004680 |            | ENSGALT00000020181 |              |
| ENSGALT00000002023 |            | ENSGALT00000020184 |              |

|                    |         |                    |              |
|--------------------|---------|--------------------|--------------|
| ENSGALT0000004693  |         | ENSGALT00000020216 |              |
| ENSGALT00000011570 |         | ENSGALT00000022876 |              |
| ENSGALT00000019416 | SIDT2   | ENSGALT00000020306 |              |
| ENSGALT00000002785 | IWS1    | ENSGALT00000016382 |              |
| ENSGALT00000004876 |         | ENSGALT00000029632 | DDI2         |
| ENSGALT00000002149 | SRSF4   | ENSGALT00000020351 | MBD5         |
| ENSGALT00000005033 |         | ENSGALT00000020382 |              |
| ENSGALT00000034008 |         | ENSGALT00000029274 |              |
| ENSGALT00000011831 | CEP164  | ENSGALT00000020390 | NMI          |
| ENSGALT00000005241 |         | ENSGALT00000020391 |              |
| ENSGALT00000002218 | PDIK1L  | ENSGALT00000020434 | ARL5A        |
| ENSGALT00000008853 | ADRBK2  | ENSGALT00000020462 | PRPF40A      |
| ENSGALT00000002281 | UTP11L  | ENSGALT00000037747 | PRPF40A      |
| ENSGALT00000002306 | FHL3    | ENSGALT00000020486 | GPD2         |
| ENSGALT00000003103 | LIMS2   | ENSGALT00000020497 |              |
| ENSGALT00000002444 | INPP5B  | ENSGALT00000020547 | MARCH7       |
| ENSGALT00000003177 | WDR33   | ENSGALT00000001983 |              |
| ENSGALT00000003200 |         | ENSGALT00000001997 |              |
| ENSGALT00000011985 | SCN4B   | ENSGALT00000023409 |              |
| ENSGALT00000034294 | SCN2B   | ENSGALT00000002123 | SERPIND<br>1 |
| ENSGALT00000003399 |         | ENSGALT00000002156 |              |
| ENSGALT00000003405 | FAM168B | ENSGALT00000002172 | YDJC         |
| ENSGALT00000003431 | ARHGEF4 | ENSGALT00000002184 |              |
| ENSGALT00000011996 |         | ENSGALT00000002268 | PPM1F        |
| ENSGALT00000011998 |         | ENSGALT00000002361 |              |
| ENSGALT00000011874 | TMPRSS5 | ENSGALT00000002464 | CDC45        |
| ENSGALT00000003570 |         | ENSGALT00000001634 |              |
| ENSGALT00000012038 | IFT46   | ENSGALT00000003148 | COMT         |
| ENSGALT00000000544 |         | ENSGALT00000003199 |              |
| ENSGALT00000010877 |         | ENSGALT00000003320 |              |
| ENSGALT00000012457 | BCL9L   | ENSGALT00000003339 | PGAM5        |
| ENSGALT00000010839 | VPS8    | ENSGALT00000003358 | ANKLE2       |
| ENSGALT00000003131 | SNIP1   | ENSGALT00000003414 | CHFR         |
| ENSGALT00000003145 | ZC3H12A | ENSGALT00000003714 | PUS1         |
| ENSGALT00000012507 | SLC37A4 | ENSGALT00000003784 | ULK1         |
| ENSGALT00000009103 | TTC28   | ENSGALT00000003883 | MMP17        |
| ENSGALT00000005757 | PTEN    | ENSGALT00000003918 | SFSWAP       |
| ENSGALT00000005787 | ATAD1   | ENSGALT00000004041 | GPR133       |
| ENSGALT00000005844 | PAPSS2  | ENSGALT00000004249 | SLC15A4      |
| ENSGALT00000006037 | PRKG1   | ENSGALT00000004577 |              |
| ENSGALT00000009289 | CCDC117 | ENSGALT00000004598 |              |

|                    |          |                     |         |
|--------------------|----------|---------------------|---------|
| ENSGALT00000006268 |          | ENSGALT00000004770  | SCARB1  |
| ENSGALT00000009327 | KREMEN1  | ENSGALT00000004933  | NCOR2   |
| ENSGALT00000006467 | SLC25A16 | ENSGALT00000005063  |         |
| ENSGALT00000006478 | TET1     | ENSGALT00000005160  | EIF2B1  |
| ENSGALT00000006533 | CCAR1    | ENSGALT00000005224  |         |
| ENSGALT00000006591 |          | ENSGALT00000005240  |         |
| ENSGALT00000009461 | DGCR14   | ENSGALT00000005250  |         |
| ENSGALT00000009474 | DGCR2    | ENSGALT00000005393  |         |
| ENSGALT00000040808 |          | ENSGALT00000005779  | PITPNM2 |
| ENSGALT00000006608 |          | ENSGALT00000005860  |         |
| ENSGALT00000010597 | DNAJB11  | ENSGALT00000005939  | VPS37B  |
| ENSGALT00000035073 | MAP7D1   | ENSGALT00000006066  | ANAPC7  |
| ENSGALT00000006635 | VPS26A   | ENSGALT00000006388  | CAMKK2  |
| ENSGALT00000012830 | DLAT     | ENSGALT00000006657  |         |
| ENSGALT00000010575 |          | ENSGALT00000001861  | PIK3R6  |
| ENSGALT00000003587 |          | ENSGALT00000026506  | HSF1    |
| ENSGALT00000006771 |          | ENSGALT00000000353  | C2CD2L  |
| ENSGALT00000003624 |          | ENSGALT00000007010  | MLXIP   |
| ENSGALT00000006816 | COL13A1  | ENSGALT00000000380  | HMBS    |
| ENSGALT00000012907 |          | ENSGALT00000007031  | DIABLO  |
| ENSGALT00000012936 | ALG9     | ENSGALT00000000393  | VPS11   |
| ENSGALT00000003529 | AGO1     | ENSGALT00000000417  | SIK2    |
| ENSGALT00000040712 |          | ENSGALT00000007244  | PPTC7   |
| ENSGALT00000006896 |          | ENSGALT00000007277  |         |
| ENSGALT00000012079 |          | ENSGALT000000035085 |         |
| ENSGALT00000001980 |          | ENSGALT00000000486  |         |
| ENSGALT00000009622 |          | ENSGALT00000001417  | PUS3    |
| ENSGALT00000006946 | MCU      | ENSGALT00000001485  | STT3A   |
| ENSGALT00000010481 | AMOTL2   | ENSGALT00000000525  | DHDDS   |
| ENSGALT00000010418 |          | ENSGALT00000001501  |         |
| ENSGALT00000010372 | PAK2     | ENSGALT00000007523  |         |
| ENSGALT00000035036 | NFYC     | ENSGALT00000001579  |         |
| ENSGALT00000008355 |          | ENSGALT00000000760  | CNKSR1  |
| ENSGALT00000010254 |          | ENSGALT00000001619  | DCPS    |
| ENSGALT00000010329 | FBXO45   | ENSGALT00000000781  | LAPTM5  |
| ENSGALT00000010325 | WDR53    | ENSGALT00000001710  |         |
| ENSGALT00000010312 | UBXN7    | ENSGALT00000001717  |         |
| ENSGALT00000010258 | D2HGDH   | ENSGALT00000007562  |         |
| ENSGALT00000007448 | C10orf54 | ENSGALT00000001790  | KCNJ5   |
| ENSGALT00000007605 |          | ENSGALT00000001897  |         |
| ENSGALT00000007678 |          | ENSGALT00000001951  | PRDM10  |
| ENSGALT00000007743 | ZMIZ1    | ENSGALT00000001988  |         |

|                    |         |                     |              |
|--------------------|---------|---------------------|--------------|
| ENSGALT00000010319 | CRKL    | ENSGALT0000000949   | SCMH1        |
| ENSGALT00000010365 | KLHL22  | ENSGALT00000038999  |              |
| ENSGALT00000010179 |         | ENSGALT00000000957  | CTPS1        |
| ENSGALT00000010381 | MED15   | ENSGALT00000010016  |              |
| ENSGALT00000010150 | THAP4   | ENSGALT00000002047  | ZBTB44       |
| ENSGALT00000010118 | KLHL30  | ENSGALT00000002056  |              |
| ENSGALT00000040502 |         | ENSGALT00000002090  | ADAMTS<br>8  |
| ENSGALT00000007982 |         | ENSGALT00000022093  | SENP1        |
| ENSGALT00000010504 | GGT5    | ENSGALT00000001026  | STX12        |
| ENSGALT00000005168 | PTP4A2  | ENSGALT00000002140  | ADAMTS<br>15 |
| ENSGALT00000010666 | GUCD1   | ENSGALT00000001032  |              |
| ENSGALT00000005230 | FAM167B | ENSGALT00000023447  | HECTD4       |
| ENSGALT00000005249 |         | ENSGALT00000001127  |              |
| ENSGALT00000008009 | COMTD1  | ENSGALT00000002230  | JAM3         |
| ENSGALT00000005346 |         | ENSGALT00000002324  |              |
| ENSGALT00000008013 | SAMD8   | ENSGALT00000001233  | KDM1A        |
| ENSGALT00000008018 |         | ENSGALT00000002439  |              |
| ENSGALT00000005386 |         | ENSGALT00000002863  |              |
| ENSGALT00000008036 |         | ENSGALT00000002903  |              |
| ENSGALT00000008109 |         | ENSGALT00000001253  | ZMPSTE<br>24 |
| ENSGALT00000005407 | ZBTB8A  | ENSGALT00000007760  | FICD         |
| ENSGALT00000021437 |         | ENSGALT00000003079  | LDB3         |
| ENSGALT00000008159 | CAMK2G  | ENSGALT00000010494  | GRAMD1<br>B  |
| ENSGALT00000004807 |         | ENSGALT00000003119  |              |
| ENSGALT00000009365 |         | ENSGALT00000010518  | CLMP         |
| ENSGALT00000009355 |         | ENSGALT00000003144  |              |
| ENSGALT00000008188 |         | ENSGALT00000003215  |              |
| ENSGALT00000009328 | SEPT2   | ENSGALT00000003257  |              |
| ENSGALT00000008243 |         | ENSGALT00000010602  | UBASH3<br>B  |
| ENSGALT00000005575 |         | ENSGALT00000007773  | ISCU         |
| ENSGALT00000008280 |         | ENSGALT00000001788  |              |
| ENSGALT00000035005 |         | ENSGALT00000001834  | PPP2R3A      |
| ENSGALT00000005643 |         | ENSGALT00000001317  |              |
| ENSGALT00000008299 |         | ENSGALT000000041155 | FAM46B       |
| ENSGALT00000008325 | SEC24C  | ENSGALT00000001355  |              |
| ENSGALT00000009299 | FARP2   | ENSGALT00000001392  | WDTC1        |
| ENSGALT00000005650 | FNDC5   | ENSGALT00000001977  |              |

|                    |          |                    |                |
|--------------------|----------|--------------------|----------------|
| ENSGALT00000010902 |          | ENSGALT00000010780 | ARHGEF<br>12   |
| ENSGALT00000005857 |          | ENSGALT00000034383 |                |
| ENSGALT00000008397 | MYOZ1    | ENSGALT00000001409 | TMEM22<br>2    |
| ENSGALT00000008407 | USP54    | ENSGALT00000034317 |                |
| ENSGALT00000008544 | EIF3F    | ENSGALT00000010901 | PVRL1          |
| ENSGALT00000008603 | SORBS1   | ENSGALT00000003908 |                |
| ENSGALT00000009101 | PTTG1IP  | ENSGALT00000010920 | C1QTNF<br>5    |
| ENSGALT00000009089 |          | ENSGALT00000040822 |                |
| ENSGALT00000033528 |          | ENSGALT00000010949 |                |
| ENSGALT00000008913 |          | ENSGALT00000022698 | WASF2          |
| ENSGALT00000008903 |          | ENSGALT00000004014 | CSGALN<br>ACT2 |
| ENSGALT00000006028 | PABPC4   | ENSGALT00000004133 | BMS1           |
| ENSGALT00000008885 |          | ENSGALT00000034212 |                |
| ENSGALT00000011126 | PISD     | ENSGALT00000004154 |                |
| ENSGALT00000006051 | NT5C1A   | ENSGALT00000041354 |                |
| ENSGALT00000008877 | TM9SF3   | ENSGALT00000004232 |                |
| ENSGALT00000011250 | PIK3IP1  | ENSGALT00000004246 | FAM149B<br>1   |
| ENSGALT00000008940 | NOLC1    | ENSGALT00000001414 | YTHDF2         |
| ENSGALT00000002915 |          | ENSGALT00000034167 |                |
| ENSGALT00000009008 | PITX3    | ENSGALT00000004265 |                |
| ENSGALT00000009044 | GBF1     | ENSGALT00000004276 | IPMK           |
| ENSGALT00000011276 |          | ENSGALT00000001474 | MTFR1L         |
| ENSGALT00000009068 |          | ENSGALT00000040809 |                |
| ENSGALT00000011283 | C12orf43 | ENSGALT00000001481 |                |
| ENSGALT00000003000 | SLC25A24 | ENSGALT00000011217 |                |
| ENSGALT00000009122 | CUEDC2   | ENSGALT00000011287 |                |
| ENSGALT00000011307 | SPPL3    | ENSGALT00000001539 | MAN1C1         |
| ENSGALT00000039703 |          | ENSGALT00000002654 | DGKD           |
| ENSGALT00000006228 | CAP1     | ENSGALT00000001574 | LDLRAP1        |
| ENSGALT00000003064 | PRPF38B  | ENSGALT00000011352 |                |
| ENSGALT00000009141 | HIF1AN   | ENSGALT00000011363 |                |
| ENSGALT00000011502 | MLEC     | ENSGALT00000004583 |                |
| ENSGALT00000008412 |          | ENSGALT00000023514 | CADM1          |
| ENSGALT00000034951 |          | ENSGALT00000001916 | CLIC4          |
| ENSGALT00000008360 | ACSL3    | ENSGALT00000001959 |                |
| ENSGALT00000003286 | CLCC1    | ENSGALT00000008249 | KCTD10         |
| ENSGALT00000011568 | RNF10    | ENSGALT00000001994 | TRNAU1         |



|                    |         |                    |         |
|--------------------|---------|--------------------|---------|
|                    |         |                    | AP      |
| ENSGALT00000003326 | WDR47   | ENSGALT00000004680 |         |
| ENSGALT00000006375 |         | ENSGALT00000002023 |         |
| ENSGALT00000008282 |         | ENSGALT00000004693 |         |
| ENSGALT00000009416 | ALOX5   | ENSGALT00000011570 |         |
| ENSGALT00000028061 | ZNF281  | ENSGALT00000019416 | SIDT2   |
| ENSGALT00000011588 |         | ENSGALT00000002785 | IWS1    |
| ENSGALT00000008246 |         | ENSGALT00000004876 |         |
| ENSGALT00000008191 | CUL3    | ENSGALT00000002149 | SRSF4   |
| ENSGALT00000011648 |         | ENSGALT00000034008 |         |
| ENSGALT00000006539 | FUCA1   | ENSGALT00000005241 |         |
| ENSGALT00000006584 |         | ENSGALT00000002218 | PDIK1L  |
| ENSGALT00000003625 | ZBTB41  | ENSGALT00000008853 | ADRBK2  |
| ENSGALT00000011727 |         | ENSGALT00000002256 |         |
| ENSGALT00000007951 | IRS1    | ENSGALT00000002281 | UTP11L  |
| ENSGALT00000011731 |         | ENSGALT00000002306 | FHL3    |
| ENSGALT00000009862 | MAPK8   | ENSGALT00000003103 | LIMS2   |
| ENSGALT00000003831 |         | ENSGALT00000002444 | INPP5B  |
| ENSGALT00000003897 |         | ENSGALT00000003177 | WDR33   |
| ENSGALT00000004005 |         | ENSGALT00000003200 |         |
| ENSGALT00000004201 | OLFML2B | ENSGALT00000011985 | SCN4B   |
| ENSGALT00000004312 | UHMK1   | ENSGALT00000034294 | SCN2B   |
| ENSGALT00000010304 | LIPA    | ENSGALT00000003399 |         |
| ENSGALT00000004870 | MFF     | ENSGALT00000003405 | FAM168B |
| ENSGALT00000011828 |         | ENSGALT00000011996 |         |
| ENSGALT00000004824 | AGFG1   | ENSGALT00000011998 |         |
| ENSGALT00000010382 | PANK1   | ENSGALT00000003570 |         |
| ENSGALT00000004687 |         | ENSGALT00000012038 | IFT46   |
| ENSGALT00000004623 | TRIP12  | ENSGALT00000000544 |         |
| ENSGALT00000010484 | RPP30   | ENSGALT00000010877 |         |
| ENSGALT00000010491 |         | ENSGALT00000012457 | BCL9L   |
| ENSGALT00000033697 |         | ENSGALT00000010839 | VPS8    |
| ENSGALT00000010507 |         | ENSGALT00000003067 | GNL2    |
| ENSGALT00000011938 | HSPB8   | ENSGALT00000003145 | ZC3H12A |
| ENSGALT00000010542 | NOC3L   | ENSGALT00000012507 | SLC37A4 |
| ENSGALT00000004729 | PHGDH   | ENSGALT00000009103 | TTC28   |
| ENSGALT00000011975 |         | ENSGALT00000005757 | PTEN    |
| ENSGALT00000038257 | VSIG10  | ENSGALT00000005787 | ATAD1   |
| ENSGALT00000019223 | PDE4DIP | ENSGALT00000041204 | KY      |
| ENSGALT00000004307 |         | ENSGALT00000006037 | PRKG1   |
| ENSGALT00000002567 |         | ENSGALT00000009289 | CCDC11  |

|                    |         |                    |              |
|--------------------|---------|--------------------|--------------|
| ENSGALT0000004266  | XRN1    | ENSGALT0000006252  | MYPN         |
| ENSGALT0000004803  | FAM78B  | ENSGALT0000006268  |              |
| ENSGALT00000010939 |         | ENSGALT00000009327 | KREMEN<br>1  |
| ENSGALT00000011152 |         | ENSGALT00000006467 | SLC25A1<br>6 |
| ENSGALT00000011201 | CPEB3   | ENSGALT00000006478 | TET1         |
| ENSGALT00000011235 | BTAF1   | ENSGALT00000006533 | CCAR1        |
| ENSGALT00000005208 | PRRC2C  | ENSGALT00000006591 |              |
| ENSGALT00000004131 | PCOLCE2 | ENSGALT00000003324 | LSM10        |
| ENSGALT00000004113 | U2SURP  | ENSGALT00000009461 | DGCR14       |
| ENSGALT00000003699 | C3orf58 | ENSGALT00000009474 | DGCR2        |
| ENSGALT00000005297 |         | ENSGALT00000040808 |              |
| ENSGALT00000013157 | CCDC88A | ENSGALT00000006608 |              |
| ENSGALT00000012100 |         | ENSGALT00000036018 | EVA1B        |
| ENSGALT00000005458 |         | ENSGALT00000010597 | DNAJB11      |
| ENSGALT00000012892 | PNPT1   | ENSGALT00000006635 | VPS26A       |
| ENSGALT00000012835 | EFEMP1  | ENSGALT00000012830 | DLAT         |
| ENSGALT00000011008 |         | ENSGALT00000003587 |              |
| ENSGALT00000012809 | VRK2    | ENSGALT00000006771 |              |
| ENSGALT00000012797 |         | ENSGALT00000006816 | COL13A1      |
| ENSGALT00000005530 | ALDH9A1 | ENSGALT00000012907 |              |
| ENSGALT00000012531 | PRODH   | ENSGALT00000012936 | ALG9         |
| ENSGALT00000039545 | R3HCC1L | ENSGALT00000003529 | AGO1         |
| ENSGALT00000012578 | OSBP2   | ENSGALT00000040712 |              |
| ENSGALT00000005552 |         | ENSGALT00000006896 |              |
| ENSGALT00000012708 |         | ENSGALT00000012079 |              |
| ENSGALT00000005721 | DARS2   | ENSGALT00000001980 |              |
| ENSGALT00000009924 |         | ENSGALT00000009622 |              |
| ENSGALT00000012192 | ANKRD2  | ENSGALT00000006946 | MCU          |
| ENSGALT00000005829 |         | ENSGALT00000007055 | SAR1A        |
| ENSGALT00000006170 |         | ENSGALT00000007067 | PPA1         |
| ENSGALT00000012894 |         | ENSGALT00000010418 |              |
| ENSGALT00000012918 |         | ENSGALT00000010372 | PAK2         |
| ENSGALT00000011075 |         | ENSGALT00000035036 | NFYC         |
| ENSGALT00000006190 | XPR1    | ENSGALT00000008355 |              |
| ENSGALT00000011195 | DLG1    | ENSGALT00000010254 |              |
| ENSGALT00000006981 |         | ENSGALT00000010286 | CABIN1       |
| ENSGALT00000033237 | EXOSC1  | ENSGALT00000010329 | FBXO45       |
| ENSGALT00000039466 |         | ENSGALT00000010325 | WDR53        |
| ENSGALT00000013047 |         | ENSGALT00000010312 | UBXN7        |
| ENSGALT00000006306 | CEP350  | ENSGALT00000010258 | D2HGDH       |

|                    |          |                    |             |
|--------------------|----------|--------------------|-------------|
| ENSGALT00000013063 | MTMR3    | ENSGALT00000007448 | C10orf54    |
| ENSGALT00000013195 |          | ENSGALT00000007605 |             |
| ENSGALT00000006691 |          | ENSGALT00000007678 |             |
| ENSGALT00000011460 | ATP13A3  | ENSGALT00000007743 | ZMIZ1       |
| ENSGALT00000006699 | ABL2     | ENSGALT00000010319 | CRKL        |
| ENSGALT00000038026 |          | ENSGALT00000010365 | KLHL22      |
| ENSGALT00000033698 |          | ENSGALT00000010179 |             |
| ENSGALT00000012402 | C10orf76 | ENSGALT00000010381 | MED15       |
| ENSGALT00000013265 |          | ENSGALT00000010150 | THAP4       |
| ENSGALT00000011583 |          | ENSGALT00000010118 | KLHL30      |
| ENSGALT00000021800 | CHPF2    | ENSGALT00000010423 | SMPD4       |
| ENSGALT00000012505 | FBXW4    | ENSGALT00000040502 |             |
| ENSGALT00000021776 | ASB10    | ENSGALT00000007982 |             |
| ENSGALT00000011646 | HRASLS   | ENSGALT00000010504 | GGT5        |
| ENSGALT00000012535 |          | ENSGALT00000005168 | PTP4A2      |
| ENSGALT00000011685 | MB21D2   | ENSGALT00000010666 | GUCD1       |
| ENSGALT00000011686 |          | ENSGALT00000005230 | FAM167B     |
| ENSGALT00000007170 | RFWD2    | ENSGALT00000005249 |             |
| ENSGALT00000013435 | ANAPC1   | ENSGALT00000005281 |             |
| ENSGALT00000011822 |          | ENSGALT00000033891 | ADORA2<br>A |
| ENSGALT00000013458 |          | ENSGALT00000008009 | COMTD1      |
| ENSGALT00000033197 | BTRC     | ENSGALT00000005346 |             |
| ENSGALT00000011871 |          | ENSGALT00000008013 | SAMD8       |
| ENSGALT00000011898 |          | ENSGALT00000008018 |             |
| ENSGALT00000012719 | KAZALD1  | ENSGALT00000005386 |             |
| ENSGALT00000039302 | SFXN3    | ENSGALT00000008036 |             |
| ENSGALT00000007316 | ZBTB37   | ENSGALT00000008109 |             |
| ENSGALT00000007329 | HEBP2    | ENSGALT00000008126 |             |
| ENSGALT00000039298 | LZTS2    | ENSGALT00000021437 |             |
| ENSGALT00000028328 |          | ENSGALT00000008159 | CAMK2G      |
| ENSGALT00000039413 |          | ENSGALT00000004807 |             |
| ENSGALT00000012083 | PCYT1A   | ENSGALT00000009365 |             |
| ENSGALT00000013379 |          | ENSGALT00000009355 |             |
| ENSGALT00000013406 | MED13L   | ENSGALT00000008188 |             |
| ENSGALT00000001591 |          | ENSGALT00000009328 | SEPT2       |
| ENSGALT00000013781 | RIN2     | ENSGALT00000008243 |             |
| ENSGALT00000039933 |          | ENSGALT00000005575 |             |
| ENSGALT00000013021 | FAM178A  | ENSGALT00000008280 |             |
| ENSGALT00000013045 |          | ENSGALT00000035005 |             |
| ENSGALT00000013124 |          | ENSGALT00000005601 | KIAA1522    |
| ENSGALT00000013893 |          | ENSGALT00000005643 |             |

|                    |          |                    |              |
|--------------------|----------|--------------------|--------------|
| ENSGALT00000013608 | TPCN1    | ENSGALT00000008299 |              |
| ENSGALT00000035381 |          | ENSGALT00000008325 | SEC24C       |
| ENSGALT00000007904 | MAP4     | ENSGALT00000009299 | FARP2        |
| ENSGALT00000013911 | KLHDC3   | ENSGALT00000005650 | FNDC5        |
| ENSGALT00000013919 |          | ENSGALT00000005690 | AK2          |
| ENSGALT00000031983 | KLC4     | ENSGALT00000010902 |              |
| ENSGALT00000033576 | C1orf21  | ENSGALT00000005857 |              |
| ENSGALT00000007675 | EDEM3    | ENSGALT00000008397 | MYOZ1        |
| ENSGALT00000012259 |          | ENSGALT00000008407 | USP54        |
| ENSGALT00000007706 | RNF2     | ENSGALT00000008499 |              |
| ENSGALT00000012281 | LRCH3    | ENSGALT00000008544 | EIF3F        |
| ENSGALT00000013188 |          | ENSGALT00000008603 | SORBS1       |
| ENSGALT00000014170 |          | ENSGALT00000009101 | PTTG1IP      |
| ENSGALT00000031981 |          | ENSGALT00000009089 |              |
| ENSGALT00000014195 | KIF16B   | ENSGALT00000021831 | PPIE         |
| ENSGALT00000008354 | OLFM3    | ENSGALT00000033528 |              |
| ENSGALT00000008454 | SEC22C   | ENSGALT00000008903 |              |
| ENSGALT00000015998 | NKTR     | ENSGALT00000006028 | PABPC4       |
| ENSGALT00000008401 |          | ENSGALT00000008885 |              |
| ENSGALT00000033492 |          | ENSGALT00000011126 | PISD         |
| ENSGALT00000008484 | KLHL40   | ENSGALT00000008618 | MRPS22       |
| ENSGALT00000008494 |          | ENSGALT00000034973 | HEYL         |
| ENSGALT00000007577 | OBSCN    | ENSGALT00000006051 | NT5C1A       |
| ENSGALT00000008467 |          | ENSGALT00000008877 | TM9SF3       |
| ENSGALT00000008474 | LRRC39   | ENSGALT00000011250 | PIK3IP1      |
| ENSGALT00000013503 | SH3PXD2A | ENSGALT00000008940 | NOLC1        |
| ENSGALT00000012486 |          | ENSGALT00000009008 | PITX3        |
| ENSGALT00000013539 | SLK      | ENSGALT00000009044 | GBF1         |
| ENSGALT00000033254 | PDE6D    | ENSGALT00000011276 |              |
| ENSGALT00000012571 | COPS7B   | ENSGALT00000009068 |              |
| ENSGALT00000014742 |          | ENSGALT00000011283 | C12orf43     |
| ENSGALT00000014738 |          | ENSGALT00000003000 | SLC25A2<br>4 |
| ENSGALT00000012599 | DIS3L2   | ENSGALT00000009122 | CUEDC2       |
| ENSGALT00000008548 |          | ENSGALT00000011307 | SPPL3        |
| ENSGALT00000008553 |          | ENSGALT00000006228 | CAP1         |
| ENSGALT00000008549 | HIAT1    | ENSGALT00000003064 | PRPF38B      |
| ENSGALT00000008683 | AGL      | ENSGALT00000009141 | HIF1AN       |
| ENSGALT00000014682 | CLIP4    | ENSGALT00000003258 | GPSM2        |
| ENSGALT00000039166 |          | ENSGALT00000011502 | MLEC         |
| ENSGALT00000014608 | TRMT61B  | ENSGALT00000008412 |              |
| ENSGALT00000008691 | SNAP47   | ENSGALT00000034951 |              |

|                    |           |                    |              |
|--------------------|-----------|--------------------|--------------|
| ENSGALT0000008701  |           | ENSGALT0000008360  | ACSL3        |
| ENSGALT0000008744  |           | ENSGALT0000003286  | CLCC1        |
| ENSGALT0000008906  | PTBP2     | ENSGALT00000011568 | RNF10        |
| ENSGALT00000014542 | FBXO11    | ENSGALT00000003326 | WDR47        |
| ENSGALT00000008961 | ALG14     | ENSGALT00000006375 |              |
| ENSGALT00000014390 |           | ENSGALT00000008282 |              |
| ENSGALT00000039077 | CNN3      | ENSGALT00000028061 | ZNF281       |
| ENSGALT00000008839 | SETD2     | ENSGALT00000011588 |              |
| ENSGALT00000014386 |           | ENSGALT00000008246 |              |
| ENSGALT00000014378 | VPS54     | ENSGALT00000008191 | CUL3         |
| ENSGALT00000008983 | TBRG4     | ENSGALT00000011648 |              |
| ENSGALT00000014290 | CEP68     | ENSGALT00000006539 | FUCA1        |
| ENSGALT00000039079 |           | ENSGALT00000006584 |              |
| ENSGALT00000009006 |           | ENSGALT00000006787 | NIPAL3       |
| ENSGALT00000014275 | SPRED2    | ENSGALT00000003625 | ZBTB41       |
| ENSGALT00000012824 |           | ENSGALT00000007951 | IRS1         |
| ENSGALT00000012833 |           | ENSGALT00000011731 |              |
| ENSGALT00000012860 | EIF4E2    | ENSGALT00000009862 | MAPK8        |
| ENSGALT00000009078 |           | ENSGALT00000003831 |              |
| ENSGALT00000014159 |           | ENSGALT00000003897 |              |
| ENSGALT00000014258 |           | ENSGALT00000004005 |              |
| ENSGALT00000014299 | GPAM      | ENSGALT00000004201 | OLFML2<br>B  |
| ENSGALT00000009422 |           | ENSGALT00000004223 |              |
| ENSGALT00000014409 | ZDHC6     | ENSGALT00000004299 | UAP1         |
| ENSGALT00000021696 | KDM2A     | ENSGALT00000004312 | UHMK1        |
| ENSGALT00000014431 |           | ENSGALT00000010304 | LIPA         |
| ENSGALT00000029637 |           | ENSGALT00000004374 | CRIP2        |
| ENSGALT00000009565 |           | ENSGALT00000004870 | MFF          |
| ENSGALT00000014249 |           | ENSGALT00000011828 |              |
| ENSGALT00000033097 |           | ENSGALT00000004824 | AGFG1        |
| ENSGALT00000009616 | OXSRI     | ENSGALT00000010311 |              |
| ENSGALT00000014566 | C10orf118 | ENSGALT00000010382 | PANK1        |
| ENSGALT00000014245 |           | ENSGALT00000004687 |              |
| ENSGALT00000009277 | TECR      | ENSGALT00000004623 | TRIP12       |
| ENSGALT00000009287 |           | ENSGALT00000010484 | RPP30        |
| ENSGALT00000031979 |           | ENSGALT00000011938 | HSPB8        |
| ENSGALT00000009337 | BCAR3     | ENSGALT00000010562 | TBC1D12      |
| ENSGALT00000014639 | AFAP1L2   | ENSGALT00000010542 | NOC3L        |
| ENSGALT00000014777 |           | ENSGALT00000010687 | FRA10AC<br>1 |
| ENSGALT00000038916 |           | ENSGALT00000004729 | PHGDH        |

|                    |           |                    |         |
|--------------------|-----------|--------------------|---------|
| ENSGALT00000014757 | ITPKB     | ENSGALT00000011975 |         |
| ENSGALT00000009713 |           | ENSGALT00000038257 | VSIG10  |
| ENSGALT00000014731 |           | ENSGALT00000004494 |         |
| ENSGALT00000009417 |           | ENSGALT00000019223 | PDE4DIP |
| ENSGALT00000014779 | FAM160B1  | ENSGALT00000033985 |         |
| ENSGALT00000014689 | BTBD3     | ENSGALT00000004307 |         |
| ENSGALT00000014663 |           | ENSGALT00000002567 |         |
| ENSGALT00000009497 |           | ENSGALT00000004266 | XRN1    |
| ENSGALT00000009517 | FAM69A    | ENSGALT00000004803 | FAM78B  |
| ENSGALT00000014420 | PLCB1     | ENSGALT00000011152 |         |
| ENSGALT00000013545 | RNPEPL1   | ENSGALT00000011201 | CPEB3   |
| ENSGALT00000009966 | XYLB      | ENSGALT00000011235 | BTAF1   |
| ENSGALT00000014329 | LRRN4     | ENSGALT00000039690 |         |
| ENSGALT00000014324 |           | ENSGALT00000005208 | PRRC2C  |
|                    |           |                    | PCOLCE  |
| ENSGALT00000014317 |           | ENSGALT00000004131 | 2       |
|                    |           |                    | U2SURP  |
| ENSGALT00000014238 |           | ENSGALT00000004113 |         |
| ENSGALT00000013645 | EIF2B5    | ENSGALT00000003699 | C3orf58 |
| ENSGALT00000013704 | DVL3      | ENSGALT00000005297 |         |
|                    |           |                    | CCDC88  |
| ENSGALT00000013739 |           | ENSGALT00000013157 | A       |
|                    |           |                    | CARD8   |
| ENSGALT00000013818 | ABCF3     | ENSGALT00000012474 |         |
| ENSGALT00000010074 | GALNT11   | ENSGALT00000012100 |         |
| ENSGALT00000009612 | KIAA1107  | ENSGALT00000005458 |         |
| ENSGALT00000014091 |           | ENSGALT00000012892 | PNPT1   |
| ENSGALT00000014068 | ACSS1     | ENSGALT00000012835 | EFEMP1  |
| ENSGALT00000015143 | RAB11FIP2 | ENSGALT00000011008 |         |
| ENSGALT00000015155 |           | ENSGALT00000012809 | VRK2    |
| ENSGALT00000033354 |           | ENSGALT00000005530 | ALDH9A1 |
| ENSGALT00000010164 |           | ENSGALT00000012531 | PRODH   |
|                    |           |                    | R3HCC1  |
| ENSGALT00000014035 |           | ENSGALT00000039545 | L       |
|                    |           |                    | OSBP2   |
| ENSGALT00000009845 | ZNF644    | ENSGALT00000012578 |         |
| ENSGALT00000015203 |           | ENSGALT00000005552 |         |
| ENSGALT00000009867 |           | ENSGALT00000012708 |         |
| ENSGALT00000009961 | LRRC8C    | ENSGALT00000005721 | DARS2   |
| ENSGALT00000009984 | CCBL2     | ENSGALT00000009924 |         |
| ENSGALT00000015262 | PRDX3     | ENSGALT00000005829 |         |
| ENSGALT00000028082 |           | ENSGALT00000006170 |         |
| ENSGALT00000038716 | RBM33     | ENSGALT00000012894 |         |
| ENSGALT00000010087 | PKN2      | ENSGALT00000012918 |         |
| ENSGALT00000010099 |           | ENSGALT00000011075 |         |

|                    |          |                    |              |
|--------------------|----------|--------------------|--------------|
| ENSGALT00000010388 | NOM1     | ENSGALT00000006190 | XPR1         |
| ENSGALT00000010467 |          | ENSGALT00000011195 | DLG1         |
| ENSGALT00000015358 | BAG3     | ENSGALT00000011255 |              |
| ENSGALT00000010570 | ESYT2    | ENSGALT00000006981 |              |
| ENSGALT00000013928 |          | ENSGALT00000039466 |              |
| ENSGALT00000014106 |          | ENSGALT00000013047 |              |
| ENSGALT00000015412 | SEC23IP  | ENSGALT00000033235 |              |
| ENSGALT00000015447 | WDR11    | ENSGALT00000013063 | MTMR3        |
| ENSGALT00000033012 |          | ENSGALT00000006396 | TOR1AIP<br>2 |
| ENSGALT00000014128 | SYDE2    | ENSGALT00000013195 |              |
| ENSGALT00000010760 | DIP2C    | ENSGALT00000006691 |              |
| ENSGALT00000013868 | ATL2     | ENSGALT00000011460 | ATP13A3      |
| ENSGALT00000010875 |          | ENSGALT00000038042 |              |
| ENSGALT00000001407 | TEAD3    | ENSGALT00000006699 | ABL2         |
| ENSGALT00000015475 |          | ENSGALT00000038026 |              |
| ENSGALT00000014277 | CTBS     | ENSGALT00000033698 |              |
| ENSGALT00000001398 |          | ENSGALT00000012402 | C10orf76     |
| ENSGALT00000013852 | HNRNPLL  | ENSGALT00000006824 |              |
| ENSGALT00000001203 | MAPK14   | ENSGALT00000013255 |              |
| ENSGALT00000011465 | CCNY     | ENSGALT00000013265 |              |
| ENSGALT00000011472 |          | ENSGALT00000011583 |              |
| ENSGALT00000038945 |          | ENSGALT00000013285 | ERLEC1       |
| ENSGALT00000011564 |          | ENSGALT00000021800 | CHPF2        |
| ENSGALT00000013878 | EIF4G1   | ENSGALT00000012505 | FBXW4        |
| ENSGALT00000011573 |          | ENSGALT00000021776 | ASB10        |
| ENSGALT00000014453 | ELTD1    | ENSGALT00000011646 | HRASLS       |
| ENSGALT00000015724 |          | ENSGALT00000012535 |              |
| ENSGALT00000001098 | TBC1D22B | ENSGALT00000011685 | MB21D2       |
| ENSGALT00000014497 | DNAJB4   | ENSGALT00000011686 |              |
| ENSGALT00000014545 | NEXN     | ENSGALT00000007170 | RFWD2        |
| ENSGALT00000015848 |          | ENSGALT00000013400 |              |
| ENSGALT00000023376 | DHX57    | ENSGALT00000013435 | ANAPC1       |
| ENSGALT00000038643 | ZRANB1   | ENSGALT00000011822 |              |
| ENSGALT00000022257 | UROS     | ENSGALT00000013458 |              |
| ENSGALT00000010681 | BCCIP    | ENSGALT00000033197 | BTRC         |
| ENSGALT00000014667 |          | ENSGALT00000011871 |              |
| ENSGALT00000001035 | CACNA1S  | ENSGALT00000011898 |              |
| ENSGALT00000040899 |          | ENSGALT00000012719 | KAZALD1      |
| ENSGALT00000021600 | SOS1     | ENSGALT00000039302 | SFXN3        |
| ENSGALT00000011752 |          | ENSGALT00000039301 | PDZD7        |
| ENSGALT00000011888 | MTPAP    | ENSGALT00000007316 | ZBTB37       |

|                    |          |                    |             |
|--------------------|----------|--------------------|-------------|
| ENSGALT00000011932 | WAC      | ENSGALT00000007329 | HEBP2       |
| ENSGALT00000011983 | MPP7     | ENSGALT00000039298 | LZTS2       |
| ENSGALT00000012033 |          | ENSGALT00000028328 |             |
| ENSGALT00000012112 |          | ENSGALT00000039413 |             |
| ENSGALT00000014845 | THUMPD2  | ENSGALT00000012083 | PCYT1A      |
| ENSGALT00000016231 |          | ENSGALT00000013379 |             |
| ENSGALT00000004009 |          | ENSGALT00000013406 | MED13L      |
| ENSGALT00000016237 |          | ENSGALT00000001591 |             |
| ENSGALT00000004002 | SHF      | ENSGALT00000007437 | SMG7        |
| ENSGALT00000003975 |          | ENSGALT00000013781 | RIN2        |
| ENSGALT00000003910 | ALPK3    | ENSGALT00000013021 | FAM178A     |
| ENSGALT00000014863 |          | ENSGALT00000013045 |             |
| ENSGALT00000003900 | ZNF592   | ENSGALT00000013124 |             |
| ENSGALT00000014913 | CHGB     | ENSGALT00000013893 |             |
| ENSGALT00000016376 | KDM4A    | ENSGALT00000013608 | TPCN1       |
| ENSGALT00000014998 | CRLS1    | ENSGALT00000039377 |             |
| ENSGALT00000017035 |          | ENSGALT00000035381 |             |
| ENSGALT00000000712 | KLHL12   | ENSGALT00000007904 | MAP4        |
| ENSGALT00000015001 |          | ENSGALT00000008045 |             |
| ENSGALT00000012598 | KIAA1217 | ENSGALT00000013899 | PPP2R5<br>D |
| ENSGALT00000012794 |          | ENSGALT00000013911 | KLHDC3      |
| ENSGALT00000038548 | ST3GAL3  | ENSGALT00000013919 |             |
| ENSGALT00000000542 | IPO9     | ENSGALT00000031983 | KLC4        |
| ENSGALT00000017059 | BNIP3    | ENSGALT00000033576 | C1orf21     |
| ENSGALT00000015061 | SDE2     | ENSGALT00000007675 | EDEM3       |
| ENSGALT00000017087 | INPP5A   | ENSGALT00000012259 |             |
| ENSGALT00000003644 | SORD     | ENSGALT00000007706 | RNF2        |
| ENSGALT00000015087 | TMEM63A  | ENSGALT00000012281 | LRCH3       |
| ENSGALT00000017131 | ALDH18A1 | ENSGALT00000008125 |             |
| ENSGALT00000003712 |          | ENSGALT00000013188 |             |
| ENSGALT00000012922 | PLXDC2   | ENSGALT00000014170 |             |
| ENSGALT00000013939 |          | ENSGALT00000013262 | CNNM2       |
| ENSGALT00000014060 |          | ENSGALT00000031981 |             |
| ENSGALT00000003690 | ZNF609   | ENSGALT00000014195 | KIF16B      |
| ENSGALT00000015154 | WDR26    | ENSGALT00000008265 |             |
| ENSGALT00000016414 |          | ENSGALT00000013413 |             |
| ENSGALT00000000450 | PPP1R12B | ENSGALT00000008354 | OLFM3       |
| ENSGALT00000015194 |          | ENSGALT00000008454 | SEC22C      |
| ENSGALT00000015195 | FBXO28   | ENSGALT00000015998 | NKTR        |
| ENSGALT00000014097 | STAM     | ENSGALT00000008401 |             |
| ENSGALT00000014104 | PTPLA    | ENSGALT00000033492 |             |



|                    |          |                    |              |
|--------------------|----------|--------------------|--------------|
| ENSGALT00000014117 |          | ENSGALT00000008484 | KLHL40       |
| ENSGALT00000015209 | TP53BP2  | ENSGALT00000008494 |              |
| ENSGALT00000016418 |          | ENSGALT00000007577 | OBSCN        |
| ENSGALT00000016432 | DMAP1    | ENSGALT00000008467 |              |
| ENSGALT00000016435 | ERI3     | ENSGALT00000008481 | TRMT13       |
| ENSGALT00000016441 |          | ENSGALT00000013503 | SH3PXD<br>2A |
| ENSGALT00000015319 | DISP1    | ENSGALT00000012486 |              |
| ENSGALT00000015332 | BROX     | ENSGALT00000013519 | OBFC1        |
| ENSGALT00000014205 | PTER     | ENSGALT00000008503 |              |
| ENSGALT00000014135 |          | ENSGALT00000013539 | SLK          |
| ENSGALT00000014256 | FAM171A1 | ENSGALT00000033254 | PDE6D        |
| ENSGALT00000016472 | PLK3     | ENSGALT00000012571 | COPS7B       |
| ENSGALT00000015381 |          | ENSGALT00000014742 |              |
| ENSGALT00000031228 | ACBD7    | ENSGALT00000014738 |              |
| ENSGALT00000015385 |          | ENSGALT00000012599 | DIS3L2       |
| ENSGALT00000014327 | CROT     | ENSGALT00000008548 |              |
| ENSGALT00000015441 | MARK1    | ENSGALT00000008553 |              |
| ENSGALT00000015469 |          | ENSGALT00000008549 | HIAT1        |
| ENSGALT00000034751 |          | ENSGALT00000008683 | AGL          |
| ENSGALT00000040700 |          | ENSGALT00000014682 | CLIP4        |
| ENSGALT00000002999 |          | ENSGALT00000039166 |              |
| ENSGALT00000000195 |          | ENSGALT00000014608 | TRMT61<br>B  |
| ENSGALT00000031945 | TGFB2    | ENSGALT00000008691 | SNAP47       |
| ENSGALT00000015667 | RRP15    | ENSGALT00000008701 |              |
| ENSGALT00000033152 |          | ENSGALT00000008744 |              |
| ENSGALT00000002757 | ADPGK    | ENSGALT00000008906 | PTBP2        |
| ENSGALT00000015752 | KCTD3    | ENSGALT00000014542 | FBXO11       |
| ENSGALT00000015916 | PTPN14   | ENSGALT00000008961 | ALG14        |
| ENSGALT00000015924 |          | ENSGALT00000013697 |              |
| ENSGALT00000000132 |          | ENSGALT00000014390 |              |
| ENSGALT00000015927 |          | ENSGALT00000039077 | CNN3         |
| ENSGALT00000031937 | RPS6KC1  | ENSGALT00000008839 | SETD2        |
| ENSGALT00000015943 |          | ENSGALT00000014386 |              |
| ENSGALT00000000123 |          | ENSGALT00000014378 | VPS54        |
| ENSGALT00000031934 | VASH2    | ENSGALT00000013886 | XPNPEP<br>1  |
| ENSGALT00000016627 | TOE1     | ENSGALT00000008983 | TBRG4        |
| ENSGALT00000031932 | BATF3    | ENSGALT00000014290 | CEP68        |
| ENSGALT00000016648 |          | ENSGALT00000039079 |              |
| ENSGALT00000015969 | NENF     | ENSGALT00000009006 |              |

|                    |          |                    |               |
|--------------------|----------|--------------------|---------------|
| ENSGALT0000007640  | FGR      | ENSGALT00000014275 | SPRED2        |
| ENSGALT00000016679 | NASP     | ENSGALT00000012824 |               |
| ENSGALT00000015980 | PPP2R5A  | ENSGALT00000031288 |               |
| ENSGALT00000014487 |          | ENSGALT00000012833 |               |
| ENSGALT00000015176 |          | ENSGALT00000013979 |               |
| ENSGALT00000022855 | COX5A    | ENSGALT00000012860 | EIF4E2        |
| ENSGALT00000016009 |          | ENSGALT00000009078 |               |
| ENSGALT00000002612 | MPI      | ENSGALT00000014159 |               |
| ENSGALT00000016032 | SLC30A1  | ENSGALT00000014258 |               |
| ENSGALT00000016037 |          | ENSGALT00000014299 | GPAM          |
| ENSGALT00000000700 | KCTD20   | ENSGALT00000009158 |               |
| ENSGALT00000000721 | STK38    | ENSGALT00000009422 |               |
| ENSGALT00000015304 | ANKIB1   | ENSGALT00000014409 | ZDHHC6        |
| ENSGALT00000002583 | SCAMP2   | ENSGALT00000021696 | KDM2A         |
| ENSGALT00000014768 |          | ENSGALT00000014431 |               |
| ENSGALT00000016717 | TMEM69   | ENSGALT00000029637 |               |
| ENSGALT00000022351 | MRPL47   | ENSGALT00000009565 |               |
| ENSGALT00000016788 | MAST2    | ENSGALT00000014249 |               |
| ENSGALT00000016854 | POMGNT1  | ENSGALT00000009616 | OXR1          |
| ENSGALT00000035250 |          | ENSGALT00000014566 | C10orf11<br>8 |
| ENSGALT00000028064 | LURAP1   | ENSGALT00000014245 |               |
| ENSGALT00000000779 | PI16     | ENSGALT00000009287 |               |
| ENSGALT00000000243 | MTCH1    | ENSGALT00000031979 |               |
| ENSGALT00000015324 |          | ENSGALT00000009337 | BCAR3         |
| ENSGALT00000016077 |          | ENSGALT00000014639 | AFAP1L2       |
| ENSGALT00000015329 | PEX1     | ENSGALT00000014777 |               |
| ENSGALT00000028065 |          | ENSGALT00000014757 | ITPKB         |
| ENSGALT00000015427 |          | ENSGALT00000009713 |               |
| ENSGALT00000002097 |          | ENSGALT00000014731 |               |
| ENSGALT00000016989 | FAAH     | ENSGALT00000009417 |               |
| ENSGALT00000002152 |          | ENSGALT00000014779 | FAM160B<br>1  |
| ENSGALT00000000864 | PPP1R15B | ENSGALT00000014689 | BTBD3         |
| ENSGALT00000000884 | PIK3C2B  | ENSGALT00000014663 |               |
| ENSGALT00000016111 | UBR2     | ENSGALT00000009497 |               |
| ENSGALT00000015485 | TFPI2    | ENSGALT00000009517 | FAM69A        |
| ENSGALT00000016119 | GLTSCR1L | ENSGALT00000014420 | PLCB1         |
| ENSGALT00000028081 | PKDCC    | ENSGALT00000013545 | RNPEPL<br>1   |
| ENSGALT00000017005 | ATPAF1   | ENSGALT00000009966 | XYLB          |
| ENSGALT00000015498 |          | ENSGALT00000014329 | LRRN4         |

|                    |         |                    |               |
|--------------------|---------|--------------------|---------------|
| ENSGALT00000041398 |         | ENSGALT00000014324 |               |
| ENSGALT00000014612 | GNB4    | ENSGALT00000014317 |               |
| ENSGALT00000017008 |         | ENSGALT00000014238 |               |
| ENSGALT00000000908 | MDM4    | ENSGALT00000013645 | EIF2B5        |
| ENSGALT00000017068 |         | ENSGALT00000013704 | DVL3          |
| ENSGALT00000000162 | ZMAT3   | ENSGALT00000013739 |               |
| ENSGALT00000002511 | SIN3A   | ENSGALT00000013818 | ABCF3         |
| ENSGALT00000017154 |         | ENSGALT00000014157 |               |
| ENSGALT00000016201 | LRPPRC  | ENSGALT00000010074 | GALNT11       |
| ENSGALT00000004220 | CSPG4   | ENSGALT00000009612 | KIAA1107      |
| ENSGALT00000014937 | NCEH1   | ENSGALT00000014091 |               |
| ENSGALT00000031920 |         | ENSGALT00000014068 | ACSS1         |
| ENSGALT00000004357 |         | ENSGALT00000015143 | RAB11FI<br>P2 |
| ENSGALT00000004380 | TSPAN3  | ENSGALT00000015155 |               |
| ENSGALT00000015009 |         | ENSGALT00000033354 |               |
| ENSGALT00000015057 | PLD1    | ENSGALT00000010164 |               |
| ENSGALT00000035232 |         | ENSGALT00000014035 |               |
| ENSGALT00000000950 | TMCC2   | ENSGALT00000009845 | ZNF644        |
| ENSGALT00000038337 |         | ENSGALT00000015203 |               |
| ENSGALT00000016234 | SRBD1   | ENSGALT00000009867 |               |
| ENSGALT00000016247 | PRKCE   | ENSGALT00000009961 | LRRC8C        |
| ENSGALT00000004485 | RCN2    | ENSGALT00000009984 | CCBL2         |
| ENSGALT00000004731 | UBE2Q2  | ENSGALT00000015262 | PRDX3         |
| ENSGALT00000015276 |         | ENSGALT00000010241 | PAXIP1        |
| ENSGALT00000000994 | ELK4    | ENSGALT00000028082 |               |
| ENSGALT00000001004 |         | ENSGALT00000010087 | PKN2          |
| ENSGALT00000016253 |         | ENSGALT00000010099 |               |
| ENSGALT00000001018 | SLC41A1 | ENSGALT00000010388 | NOM1          |
| ENSGALT00000017199 | TXNDC12 | ENSGALT00000015343 | RGS10         |
| ENSGALT00000017200 |         | ENSGALT00000010467 |               |
| ENSGALT00000031915 | PIGF    | ENSGALT00000010570 | ESYT2         |
| ENSGALT00000016264 |         | ENSGALT00000015375 | INPP5F        |
| ENSGALT00000017269 | ZFYVE9  | ENSGALT00000013928 |               |
| ENSGALT00000016269 |         | ENSGALT00000015412 | SEC23IP       |
| ENSGALT00000016270 |         | ENSGALT00000015447 | WDR11         |
| ENSGALT00000015328 | MYNN    | ENSGALT00000033012 |               |
| ENSGALT00000001027 |         | ENSGALT00000014116 |               |
| ENSGALT00000031908 |         | ENSGALT00000014128 | SYDE2         |
| ENSGALT00000017276 | CC2D1B  | ENSGALT00000010760 | DIP2C         |
| ENSGALT00000015429 |         | ENSGALT00000013868 | ATL2          |
| ENSGALT00000016303 |         | ENSGALT00000010875 |               |

|                    |          |                    |              |
|--------------------|----------|--------------------|--------------|
| ENSGALT00000016306 |          | ENSGALT00000015475 |              |
| ENSGALT00000016321 | RBKS     | ENSGALT00000014277 | CTBS         |
| ENSGALT00000016329 | SUPT7L   | ENSGALT00000001398 |              |
| ENSGALT00000017295 | ZCCHC11  | ENSGALT00000010908 | WDR37        |
| ENSGALT00000001189 | SRGAP2   | ENSGALT00000013852 | HNRNPL<br>L  |
| ENSGALT00000015740 | SGCE     | ENSGALT00000001203 | MAPK14       |
| ENSGALT00000001255 |          | ENSGALT00000011465 | CCNY         |
| ENSGALT00000001265 | DYRK3    | ENSGALT00000011472 |              |
| ENSGALT00000001297 | MAPKAPK2 | ENSGALT00000022442 | GALM         |
| ENSGALT00000016469 | GLO1     | ENSGALT00000038945 |              |
| ENSGALT00000015772 | ASB4     | ENSGALT00000011564 |              |
| ENSGALT00000015790 |          | ENSGALT00000014411 |              |
| ENSGALT00000017326 | SCP2     | ENSGALT00000013878 | EIF4G1       |
| ENSGALT00000034634 |          | ENSGALT00000011573 |              |
| ENSGALT00000040356 |          | ENSGALT00000014453 | ELTD1        |
| ENSGALT00000005141 | DNAJA4   | ENSGALT00000015724 |              |
| ENSGALT00000015833 |          | ENSGALT00000001098 | TBC1D22<br>B |
| ENSGALT00000016480 | ZFAND3   | ENSGALT00000014545 | NEXN         |
| ENSGALT00000005233 |          | ENSGALT00000015848 |              |
| ENSGALT00000015869 |          | ENSGALT00000023376 | DHX57        |
| ENSGALT00000005261 | TBC1D2B  | ENSGALT00000022257 | UROS         |
| ENSGALT00000005279 | DAPK2    | ENSGALT00000010681 | BCCIP        |
| ENSGALT00000005378 | FBXL22   | ENSGALT00000014667 |              |
| ENSGALT00000005420 | USP3     | ENSGALT00000001035 | CACNA1<br>S  |
| ENSGALT00000005515 | RAB8B    | ENSGALT00000040899 |              |
| ENSGALT00000017402 | MIOS     | ENSGALT00000000815 | PTPRH        |
| ENSGALT00000016499 | CMTR1    | ENSGALT00000021600 | SOS1         |
| ENSGALT00000017329 | PODN     | ENSGALT00000011752 |              |
| ENSGALT00000001781 |          | ENSGALT00000020791 |              |
| ENSGALT00000017404 | RPA3     | ENSGALT00000011883 | KIAA1462     |
| ENSGALT00000037997 | RPA3-AS1 | ENSGALT00000011888 | MTPAP        |
| ENSGALT00000001786 | CD34     | ENSGALT00000011932 | WAC          |
| ENSGALT00000015516 | NMD3     | ENSGALT00000011983 | MPP7         |
| ENSGALT00000015523 | PPM1L    | ENSGALT00000012033 |              |
| ENSGALT00000015544 |          | ENSGALT00000012112 |              |
| ENSGALT00000039589 |          | ENSGALT00000014845 | THUMPD<br>2  |
| ENSGALT00000039192 |          | ENSGALT00000016208 |              |
| ENSGALT00000038176 | RNF8     | ENSGALT00000016231 |              |

|                    |           |                    |              |
|--------------------|-----------|--------------------|--------------|
| ENSGALT00000015632 |           | ENSGALT00000004009 |              |
| ENSGALT00000016540 | SLC35B2   | ENSGALT00000016237 |              |
| ENSGALT00000015688 | GFM1      | ENSGALT00000004002 | SHF          |
| ENSGALT00000016551 | SLC29A1   | ENSGALT00000003975 |              |
| ENSGALT00000038145 |           | ENSGALT00000003910 | ALPK3        |
| ENSGALT00000039093 | MLF1      | ENSGALT00000013907 |              |
| ENSGALT00000016725 | TMEM63B   | ENSGALT00000014863 |              |
| ENSGALT00000017557 | ISPD      | ENSGALT00000003900 | ZNF592       |
| ENSGALT00000017469 | NDC1      | ENSGALT00000014913 | CHGB         |
| ENSGALT00000017477 |           | ENSGALT00000016376 | KDM4A        |
| ENSGALT00000002207 | ATP5F1    | ENSGALT00000014998 | CRLS1        |
| ENSGALT00000015739 | RSRC1     | ENSGALT00000029070 | MGMT         |
| ENSGALT00000002238 | RAP1A     | ENSGALT00000017035 |              |
| ENSGALT00000032981 | C3orf55   | ENSGALT00000000712 | KLHL12       |
| ENSGALT00000017661 |           | ENSGALT00000012469 |              |
| ENSGALT00000017484 |           | ENSGALT00000015001 |              |
| ENSGALT00000017487 |           | ENSGALT00000012598 | KIAA1217     |
| ENSGALT00000016736 | MRPL14    | ENSGALT00000012794 |              |
| ENSGALT00000017736 | SP4       | ENSGALT00000038548 | ST3GAL3      |
| ENSGALT00000017745 | RAPGEF5   | ENSGALT00000000542 | IPO9         |
| ENSGALT00000017540 | ACOT11    | ENSGALT00000017059 | BNIP3        |
| ENSGALT00000002440 | PPM1J     | ENSGALT00000017087 | INPP5A       |
| ENSGALT00000005967 |           | ENSGALT00000003644 | SORD         |
| ENSGALT00000016751 |           | ENSGALT00000015087 | TMEM63<br>A  |
| ENSGALT00000016682 | TIPARP    | ENSGALT00000017131 | ALDH18A<br>1 |
| ENSGALT00000002661 | LRIG2     | ENSGALT00000003712 |              |
| ENSGALT00000006011 | BNIP2     | ENSGALT00000012922 | PLXDC2       |
| ENSGALT00000016793 | GTPBP2    | ENSGALT00000013939 |              |
| ENSGALT00000006179 | MTMR10    | ENSGALT00000003690 | ZNF609       |
| ENSGALT00000017568 | USP24     | ENSGALT00000003646 | TRIP4        |
| ENSGALT00000017589 |           | ENSGALT00000016414 |              |
| ENSGALT00000016730 |           | ENSGALT00000000450 | PPP1R12<br>B |
| ENSGALT00000016835 |           | ENSGALT00000034726 | SNX1         |
| ENSGALT00000016761 | SLC33A1   | ENSGALT00000015194 |              |
| ENSGALT00000017826 |           | ENSGALT00000015195 | FBXO28       |
| ENSGALT00000017301 |           | ENSGALT00000014097 | STAM         |
| ENSGALT00000003002 | HIPK1     | ENSGALT00000014104 | PTPLA        |
| ENSGALT00000006206 | MPHOSPH10 | ENSGALT00000014117 |              |
| ENSGALT00000017683 | FGGY      | ENSGALT00000003234 | MYO9A        |

|                    |         |                    |              |
|--------------------|---------|--------------------|--------------|
| ENSGALT00000017829 | MALSU1  | ENSGALT00000015209 | TP53BP2      |
| ENSGALT00000016815 |         | ENSGALT00000016418 |              |
| ENSGALT00000003070 | TRIM33  | ENSGALT00000016432 | DMAP1        |
| ENSGALT00000017877 |         | ENSGALT00000016435 | ERI3         |
| ENSGALT00000017882 | CCDC126 | ENSGALT00000016441 |              |
| ENSGALT00000034521 | MCEE    | ENSGALT00000015319 | DISP1        |
| ENSGALT00000017975 |         | ENSGALT00000015332 | BROX         |
| ENSGALT00000006347 | TARSL2  | ENSGALT00000014205 | PTER         |
| ENSGALT00000006419 | TM2D3   | ENSGALT00000014135 |              |
| ENSGALT00000017979 |         | ENSGALT00000003113 | GRAMD2       |
| ENSGALT00000032964 | TM2D1   | ENSGALT00000016462 | KIF2C        |
| ENSGALT00000018006 |         | ENSGALT00000014256 | FAM171A<br>1 |
| ENSGALT00000006440 | LARP6   | ENSGALT00000016472 | PLK3         |
| ENSGALT00000016864 |         | ENSGALT00000015381 |              |
| ENSGALT00000006501 | THSD4   | ENSGALT00000015385 |              |
| ENSGALT00000018005 |         | ENSGALT00000014327 | CROT         |
| ENSGALT00000017894 | ATG4C   | ENSGALT00000015441 | MARK1        |
| ENSGALT00000018034 |         | ENSGALT00000015469 |              |
| ENSGALT00000018085 |         | ENSGALT00000034751 |              |
| ENSGALT00000018131 |         | ENSGALT00000040700 |              |
| ENSGALT00000016884 |         | ENSGALT00000002999 |              |
| ENSGALT00000018137 |         | ENSGALT00000000195 |              |
| ENSGALT00000017947 |         | ENSGALT00000031945 | TGFB2        |
| ENSGALT00000018161 | CREB5   | ENSGALT00000033152 |              |
| ENSGALT00000018199 | CHN2    | ENSGALT00000002757 | ADPGK        |
| ENSGALT00000006663 | SLTM    | ENSGALT00000015752 | KCTD3        |
| ENSGALT00000017953 |         | ENSGALT00000015916 | PTPN14       |
| ENSGALT00000017959 | CACHD1  | ENSGALT00000015924 |              |
| ENSGALT00000016916 | TJAP1   | ENSGALT00000000132 |              |
| ENSGALT00000017964 | RAVER2  | ENSGALT00000031937 | RPS6KC<br>1  |
| ENSGALT00000003247 |         | ENSGALT00000015943 |              |
| ENSGALT00000018212 | WIPF3   | ENSGALT00000000123 |              |
| ENSGALT00000018231 | FKBP14  | ENSGALT00000031934 | VASH2        |
| ENSGALT00000018282 |         | ENSGALT00000014615 |              |
| ENSGALT00000034417 |         | ENSGALT00000014450 |              |
| ENSGALT00000018291 |         | ENSGALT00000016648 |              |
| ENSGALT00000018312 | ANKRD28 | ENSGALT00000015969 | NENF         |
| ENSGALT00000018324 | GALNT15 | ENSGALT00000016679 | NASP         |
| ENSGALT00000018327 | DPH3    | ENSGALT00000000439 |              |
| ENSGALT00000016977 | ZNF318  | ENSGALT00000015980 | PPP2R5A      |

|                    |          |                    |              |
|--------------------|----------|--------------------|--------------|
| ENSGALT00000016982 |          | ENSGALT00000014487 |              |
| ENSGALT00000018329 |          | ENSGALT00000014750 | CDK14        |
| ENSGALT00000017012 | LTBP3    | ENSGALT00000015176 |              |
| ENSGALT00000018331 |          | ENSGALT00000022855 | COX5A        |
| ENSGALT00000017995 |          | ENSGALT00000015990 |              |
| ENSGALT00000040028 |          | ENSGALT00000016009 |              |
| ENSGALT00000018348 | PLCL2    | ENSGALT00000002612 | MPI          |
| ENSGALT00000022526 | MNS1     | ENSGALT00000016017 |              |
| ENSGALT00000018402 | KAT2B    | ENSGALT00000015253 |              |
| ENSGALT00000016930 | SIAH2    | ENSGALT00000016032 | SLC30A1      |
| ENSGALT00000001028 | RFX7     | ENSGALT00000016037 |              |
| ENSGALT00000016934 |          | ENSGALT00000000700 | KCTD20       |
| ENSGALT00000018125 | SLC35D1  | ENSGALT00000000721 | STK38        |
| ENSGALT00000017165 |          | ENSGALT00000016049 | RCOR3        |
| ENSGALT00000006970 |          | ENSGALT00000015304 | ANKIB1       |
| ENSGALT00000038194 |          | ENSGALT00000002583 | SCAMP2       |
| ENSGALT00000018407 | ZNF385D  | ENSGALT00000014768 |              |
| ENSGALT00000018414 | UBE2E1   | ENSGALT00000016717 | TMEM69       |
| ENSGALT00000007059 |          | ENSGALT00000022351 | MRPL47       |
| ENSGALT00000018418 | NKIRAS1  | ENSGALT00000016788 | MAST2        |
| ENSGALT00000016952 | WWTR1    | ENSGALT00000016854 | POMGNT<br>1  |
| ENSGALT00000007264 |          | ENSGALT00000035250 |              |
| ENSGALT00000017201 | HEATR5B  | ENSGALT00000028064 | LURAP1       |
| ENSGALT00000017218 | STRN     | ENSGALT00000000779 | PI16         |
| ENSGALT00000039081 |          | ENSGALT00000000243 | MTCH1        |
| ENSGALT00000018328 |          | ENSGALT00000015310 |              |
| ENSGALT00000018364 |          | ENSGALT00000016072 |              |
| ENSGALT00000016991 | CP       | ENSGALT00000015324 |              |
| ENSGALT00000018434 |          | ENSGALT00000016077 |              |
| ENSGALT00000037966 |          | ENSGALT00000028065 |              |
| ENSGALT00000018443 |          | ENSGALT00000015427 |              |
| ENSGALT00000018455 | ANKRD13C | ENSGALT00000015428 |              |
| ENSGALT00000016995 | HPS3     | ENSGALT00000002097 |              |
| ENSGALT00000017268 | PRKD3    | ENSGALT00000016989 | FAAH         |
| ENSGALT00000017274 | QPCT     | ENSGALT00000000864 | PPP1R15<br>B |
| ENSGALT00000017275 |          | ENSGALT00000000884 | PIK3C2B      |
| ENSGALT00000018537 | TYW3     | ENSGALT00000016111 | UBR2         |
| ENSGALT00000004361 | UHRF1BP1 | ENSGALT00000015485 | TFPI2        |
| ENSGALT00000017280 |          | ENSGALT00000016119 | GLTSCR<br>1L |

|                    |          |                    |             |
|--------------------|----------|--------------------|-------------|
| ENSGALT00000018563 | SLC44A5  | ENSGALT00000028081 | PKDCC       |
| ENSGALT00000017288 |          | ENSGALT00000017005 | ATPAF1      |
| ENSGALT00000018575 | RABGGTB  | ENSGALT00000015498 |             |
| ENSGALT00000018582 | MSH4     | ENSGALT00000041398 |             |
| ENSGALT00000018458 | LRRC3B   | ENSGALT00000014612 | GNB4        |
| ENSGALT00000017325 | CNST     | ENSGALT00000017008 |             |
| ENSGALT00000017328 | TFB2M    | ENSGALT00000000908 | MDM4        |
| ENSGALT00000004387 |          | ENSGALT00000017068 |             |
| ENSGALT00000037849 |          | ENSGALT00000002409 |             |
| ENSGALT00000018603 | SLC4A7   | ENSGALT00000000162 | ZMAT3       |
| ENSGALT00000018638 | AZI2     | ENSGALT00000002511 | SIN3A       |
| ENSGALT00000018667 | GADL1    | ENSGALT00000017152 | CDKN2C      |
| ENSGALT00000017370 |          | ENSGALT00000017154 |             |
| ENSGALT00000017414 | ZBTB18   | ENSGALT00000016201 | LRPPRC      |
| ENSGALT00000017430 | SDCCAG8  | ENSGALT00000004220 | CSPG4       |
| ENSGALT00000017461 | CEP170   | ENSGALT00000014937 | NCEH1       |
| ENSGALT00000017613 |          | ENSGALT00000031920 |             |
| ENSGALT00000018718 | GPD1L    | ENSGALT00000004357 |             |
| ENSGALT00000000338 | HEATR1   | ENSGALT00000004380 | TSPAN3      |
| ENSGALT00000004468 |          | ENSGALT00000015009 |             |
| ENSGALT00000017618 | ERO1LB   | ENSGALT00000015057 | PLD1        |
| ENSGALT00000017890 | NID1     | ENSGALT00000035232 |             |
| ENSGALT00000018725 |          | ENSGALT00000000950 | TMCC2       |
| ENSGALT00000018727 | CMTM6    | ENSGALT00000038337 |             |
| ENSGALT00000004481 | GRM4     | ENSGALT00000016234 | SRBD1       |
| ENSGALT00000035045 |          | ENSGALT00000004485 | RCN2        |
| ENSGALT00000004543 |          | ENSGALT00000004731 | UBE2Q2      |
| ENSGALT00000018736 | TCAIM    | ENSGALT00000015276 |             |
| ENSGALT00000022610 | B3GALNT2 | ENSGALT00000000994 | ELK4        |
| ENSGALT00000004102 | GGPS1    | ENSGALT00000001004 |             |
| ENSGALT00000000385 | ARID4B   | ENSGALT00000016253 |             |
| ENSGALT00000007734 | SEMA6D   | ENSGALT00000001018 | SLC41A1     |
| ENSGALT00000018770 | ANO10    | ENSGALT00000017199 | TXNDC1<br>2 |
| ENSGALT00000022567 | TOMM20   | ENSGALT00000017200 |             |
| ENSGALT00000018780 |          | ENSGALT00000031915 | PIGF        |
| ENSGALT00000018812 | EAF1     | ENSGALT00000016264 |             |
| ENSGALT00000017944 |          | ENSGALT00000017269 | ZFYVE9      |
| ENSGALT00000018839 |          | ENSGALT00000016269 |             |
| ENSGALT00000018846 | CAPN7    | ENSGALT00000016270 |             |
| ENSGALT00000018026 |          | ENSGALT00000015328 | MYNN        |
| ENSGALT00000018060 | RAB4A    | ENSGALT00000001027 |             |



|                    |           |                    |              |
|--------------------|-----------|--------------------|--------------|
| ENSGALT0000009049  | CEP152    | ENSGALT00000015414 |              |
| ENSGALT00000018064 |           | ENSGALT00000015416 |              |
| ENSGALT00000018070 | NUP133    | ENSGALT00000031908 |              |
| ENSGALT00000034280 | SECISBP2L | ENSGALT00000017276 | CC2D1B       |
| ENSGALT00000018081 | TAF5L     | ENSGALT00000015429 |              |
| ENSGALT00000018087 | URB2      | ENSGALT00000016303 |              |
| ENSGALT00000005108 | APOBEC2   | ENSGALT00000016306 |              |
| ENSGALT00000018092 | GALNT2    | ENSGALT00000016321 | RBKS         |
| ENSGALT00000005111 |           | ENSGALT00000016329 | SUPT7L       |
| ENSGALT00000018903 | ATP2C1    | ENSGALT00000001149 |              |
| ENSGALT00000031841 | C1orf131  | ENSGALT00000017295 | ZCCHC1<br>1  |
| ENSGALT00000018198 | GNPAT     | ENSGALT00000001189 | SRGAP2       |
| ENSGALT00000018210 |           | ENSGALT00000015740 | SGCE         |
| ENSGALT00000018940 |           | ENSGALT00000001255 |              |
| ENSGALT00000018217 |           | ENSGALT00000017302 |              |
| ENSGALT00000018228 | FAM120B   | ENSGALT00000025940 |              |
| ENSGALT00000018250 | PHF10     | ENSGALT00000001265 | DYRK3        |
| ENSGALT00000018251 |           | ENSGALT00000001297 | MAPKAP<br>K2 |
| ENSGALT00000019087 | DNAJC13   | ENSGALT00000016469 | GLO1         |
| ENSGALT00000018269 | SMOC2     | ENSGALT00000015772 | ASB4         |
| ENSGALT00000005461 | FRS3      | ENSGALT00000017326 | SCP2         |
| ENSGALT00000009208 |           | ENSGALT00000034634 |              |
| ENSGALT00000009244 |           | ENSGALT00000040356 |              |
| ENSGALT00000005500 |           | ENSGALT00000005141 | DNAJA4       |
| ENSGALT00000005492 | BYSL      | ENSGALT00000015833 |              |
| ENSGALT00000009484 | USP8      | ENSGALT00000016480 | ZFAND3       |
| ENSGALT00000018633 | FGFR1OP   | ENSGALT00000005233 |              |
| ENSGALT00000037674 |           | ENSGALT00000015869 |              |
| ENSGALT00000018857 | PARK2     | ENSGALT00000005261 | TBC1D2B      |
| ENSGALT00000018893 | MAP3K4    | ENSGALT00000005378 | FBXL22       |
| ENSGALT00000019134 |           | ENSGALT00000005420 | USP3         |
| ENSGALT00000038740 |           | ENSGALT00000005515 | RAB8B        |
| ENSGALT00000037615 | CDV3      | ENSGALT00000017402 | MIOS         |
| ENSGALT00000009646 | FSD2      | ENSGALT00000016499 | CMTR1        |
| ENSGALT00000009670 |           | ENSGALT00000017329 | PODN         |
| ENSGALT00000037604 |           | ENSGALT00000001781 |              |
| ENSGALT00000009692 |           | ENSGALT00000017404 | RPA3         |
| ENSGALT00000009702 |           | ENSGALT00000037997 | RPA3-AS<br>1 |
| ENSGALT00000018986 |           | ENSGALT00000001786 | CD34         |

|                    |          |                    |             |
|--------------------|----------|--------------------|-------------|
| ENSGALT00000019010 |          | ENSGALT00000015516 | NMD3        |
| ENSGALT00000005608 |          | ENSGALT00000015523 | PPM1L       |
| ENSGALT00000005617 | PRELP    | ENSGALT00000039589 |             |
| ENSGALT00000019329 | SACM1L   | ENSGALT00000039192 |             |
| ENSGALT00000010337 |          | ENSGALT00000038176 | RNF8        |
| ENSGALT00000019332 | LIMD1    | ENSGALT00000015632 |             |
| ENSGALT00000019376 | LARS2    | ENSGALT00000015634 |             |
| ENSGALT00000019061 | WTAP     | ENSGALT00000016540 | SLC35B2     |
| ENSGALT00000019062 |          | ENSGALT00000015688 | GFM1        |
| ENSGALT00000019065 | FNDC1    | ENSGALT00000016551 | SLC29A1     |
| ENSGALT00000031806 |          | ENSGALT00000038145 |             |
| ENSGALT00000020066 | FBXO30   | ENSGALT00000039093 | MLF1        |
| ENSGALT00000019393 | ZDHHC3   | ENSGALT00000016725 | TMEM63<br>B |
| ENSGALT00000020159 | STXBP5   | ENSGALT00000017557 | ISPD        |
| ENSGALT00000020165 | SASH1    | ENSGALT00000017469 | NDC1        |
| ENSGALT00000020182 | TAB2     | ENSGALT00000017477 |             |
| ENSGALT00000020197 |          | ENSGALT00000002207 | ATP5F1      |
| ENSGALT00000010523 |          | ENSGALT00000002238 | RAP1A       |
| ENSGALT00000010528 |          | ENSGALT00000017661 |             |
| ENSGALT00000020225 | NUP43    | ENSGALT00000017484 |             |
| ENSGALT00000019426 |          | ENSGALT00000017487 |             |
| ENSGALT00000037591 |          | ENSGALT00000016736 | MRPL14      |
| ENSGALT00000031799 | LRP11    | ENSGALT00000017745 | RAPGEF<br>5 |
| ENSGALT00000020231 | PPP1R14C | ENSGALT00000017540 | ACOT11      |
| ENSGALT00000020285 | MTHFD1L  | ENSGALT00000002440 | PPM1J       |
| ENSGALT00000037581 | AKAP12   | ENSGALT00000005967 |             |
| ENSGALT00000021152 |          | ENSGALT00000016751 |             |
| ENSGALT00000019473 | TRAK1    | ENSGALT00000002661 | LRIG2       |
| ENSGALT00000022138 | FBXO5    | ENSGALT00000017560 |             |
| ENSGALT00000019478 | EIF1B    | ENSGALT00000006011 | BNIP2       |
| ENSGALT00000022168 |          | ENSGALT00000016762 |             |
| ENSGALT00000022182 | SCAF8    | ENSGALT00000016793 | GTPBP2      |
| ENSGALT00000019495 |          | ENSGALT00000006179 | MTMR10      |
| ENSGALT00000022196 | TFB1M    | ENSGALT00000017568 | USP24       |
| ENSGALT00000022259 | TMEM242  | ENSGALT00000017589 |             |
| ENSGALT00000022265 | ZDHHC14  | ENSGALT00000016730 |             |
| ENSGALT00000022291 | SNX9     | ENSGALT00000016835 |             |
| ENSGALT00000010812 | ABHD2    | ENSGALT00000016761 | SLC33A1     |
| ENSGALT00000019569 |          | ENSGALT00000017659 | OMA1        |
| ENSGALT00000022311 | SYNJ2    | ENSGALT00000017826 |             |

|                    |          |                    |               |
|--------------------|----------|--------------------|---------------|
| ENSGALT00000031788 | DYNLT1   | ENSGALT00000017301 |               |
| ENSGALT00000010834 |          | ENSGALT00000003002 | HIPK1         |
| ENSGALT00000019676 | ARPP21   | ENSGALT00000003025 |               |
| ENSGALT00000034015 | HAPLN3   | ENSGALT00000006206 | MPHOSP<br>H10 |
| ENSGALT00000022346 | PLAGL1   | ENSGALT00000017683 | FGGY          |
| ENSGALT00000022358 | LTV1     | ENSGALT00000017829 | MALSU1        |
| ENSGALT00000010909 | DET1     | ENSGALT00000016815 |               |
| ENSGALT00000022362 | PHACTR2  | ENSGALT00000003070 | TRIM33        |
| ENSGALT00000019702 | MLH1     | ENSGALT00000017877 |               |
| ENSGALT00000022374 | PEX3     | ENSGALT00000017882 | CCDC12<br>6   |
| ENSGALT00000031785 | ADAT2    | ENSGALT00000034521 | MCEE          |
| ENSGALT00000022379 | AIG1     | ENSGALT00000017975 |               |
| ENSGALT00000022399 | HIVEP2   | ENSGALT00000006347 | TARSL2        |
| ENSGALT00000022415 | VTA1     | ENSGALT00000006419 | TM2D3         |
| ENSGALT00000019716 | EPDR1    | ENSGALT00000017979 |               |
| ENSGALT00000022435 | HECA     | ENSGALT00000032964 | TM2D1         |
| ENSGALT00000011024 | AGBL1    | ENSGALT00000018006 |               |
| ENSGALT00000022483 | TNFAIP3  | ENSGALT00000016864 |               |
| ENSGALT00000031776 |          | ENSGALT00000037820 |               |
| ENSGALT00000011148 |          | ENSGALT00000017894 | ATG4C         |
| ENSGALT00000011156 | FAM174B  | ENSGALT00000018013 |               |
| ENSGALT00000011260 | CHD2     | ENSGALT00000018034 |               |
| ENSGALT00000022522 | MAP3K5   | ENSGALT00000018085 |               |
| ENSGALT00000019783 | KIAA0895 | ENSGALT00000017909 | EFCAB7        |
| ENSGALT00000019789 | EEPDP1   | ENSGALT00000018131 |               |
| ENSGALT00000019828 |          | ENSGALT00000016884 |               |
| ENSGALT00000019843 | HERPUD2  | ENSGALT00000018137 |               |
| ENSGALT00000022595 | PDE7B    | ENSGALT00000017947 |               |
| ENSGALT00000022607 | AHI1     | ENSGALT00000018161 | CREB5         |
| ENSGALT00000019858 |          | ENSGALT00000018199 | CHN2          |
| ENSGALT00000022653 | SLC2A12  | ENSGALT00000006663 | SLTM          |
| ENSGALT00000022662 | EYA4     | ENSGALT00000017953 |               |
| ENSGALT00000019894 |          | ENSGALT00000017959 | CACHD1        |
| ENSGALT00000022671 |          | ENSGALT00000016916 | TJAP1         |
| ENSGALT00000019908 |          | ENSGALT00000017964 | RAVER2        |
| ENSGALT00000037476 |          | ENSGALT00000003247 |               |
| ENSGALT00000004596 |          | ENSGALT00000018212 | WIPF3         |
| ENSGALT00000004590 |          | ENSGALT00000018231 | FKBP14        |
| ENSGALT00000031116 | RP9      | ENSGALT00000018238 | PLEKHA8       |
| ENSGALT00000019924 | KBTBD2   | ENSGALT00000018282 |               |

|                    |          |                    |             |
|--------------------|----------|--------------------|-------------|
| ENSGALT00000011432 |          | ENSGALT00000034417 |             |
| ENSGALT00000019935 | LSM5     | ENSGALT00000018291 |             |
| ENSGALT00000011484 | LYSMD4   | ENSGALT00000018312 | ANKRD2<br>8 |
| ENSGALT00000022702 | ARHGAP18 | ENSGALT00000018324 | GALNT15     |
| ENSGALT00000022704 | LAMA2    | ENSGALT00000018327 | DPH3        |
| ENSGALT00000023965 | TRDN     | ENSGALT00000016977 | ZNF318      |
| ENSGALT00000023984 | SMPDL3A  | ENSGALT00000016982 |             |
| ENSGALT00000023989 |          | ENSGALT00000018329 |             |
| ENSGALT00000020113 | YAE1D1   | ENSGALT00000017012 | LTBP3       |
| ENSGALT00000011601 |          | ENSGALT00000017973 | AK4         |
| ENSGALT00000037441 | MPLKIP   | ENSGALT00000018331 |             |
| ENSGALT00000011612 |          | ENSGALT00000017995 |             |
| ENSGALT00000020152 | C7orf25  | ENSGALT00000040028 |             |
| ENSGALT00000031107 |          | ENSGALT00000040026 |             |
| ENSGALT00000011615 | PCSK6    | ENSGALT00000018348 | PLCL2       |
| ENSGALT00000011730 |          | ENSGALT00000018357 | TBC1D5      |
| ENSGALT00000024023 | CEP85L   | ENSGALT00000022526 | MNS1        |
| ENSGALT00000020178 | BLVRA    | ENSGALT00000004037 | TSPAN2      |
| ENSGALT00000024033 | NUS1     | ENSGALT00000018402 | KAT2B       |
| ENSGALT00000031104 | VOPP1    | ENSGALT00000001028 | RFX7        |
| ENSGALT00000020187 | LANCL2   | ENSGALT00000016934 |             |
| ENSGALT00000037413 |          | ENSGALT00000018125 | SLC35D1     |
| ENSGALT00000024042 | DCBLD1   | ENSGALT00000017165 |             |
| ENSGALT00000020200 | TPK1     | ENSGALT00000018407 | ZNF385D     |
| ENSGALT00000024059 |          | ENSGALT00000018414 | UBE2E1      |
| ENSGALT00000011754 |          | ENSGALT00000007043 | PIGB        |
| ENSGALT00000020338 |          | ENSGALT00000007059 |             |
| ENSGALT00000020347 |          | ENSGALT00000018418 | NKIRAS1     |
| ENSGALT00000020352 |          | ENSGALT00000037758 | RPL15       |
| ENSGALT00000024093 | KPNA5    | ENSGALT00000016952 | WWTR1       |
| ENSGALT00000031095 |          | ENSGALT00000007264 |             |
| ENSGALT00000024128 |          | ENSGALT00000017201 | HEATR5<br>B |
| ENSGALT00000024130 | DSE      | ENSGALT00000017218 | STRN        |
| ENSGALT00000024132 | NT5DC1   | ENSGALT00000039081 |             |
| ENSGALT00000020442 | BRD9     | ENSGALT00000018328 |             |
| ENSGALT00000020444 | TPPP     | ENSGALT00000018364 |             |
| ENSGALT00000020449 | LRRC14B  | ENSGALT00000016985 | TM4SF18     |
| ENSGALT00000020597 | COL15A1  | ENSGALT00000018434 |             |
| ENSGALT00000024248 | KIAA1919 | ENSGALT00000037966 |             |
| ENSGALT00000024256 | SLC16A10 | ENSGALT00000018443 |             |

|                    |         |                     |               |
|--------------------|---------|---------------------|---------------|
| ENSGALT00000024267 |         | ENSGALT00000018455  | ANKRD1<br>3C  |
| ENSGALT00000020598 |         | ENSGALT00000018492  | CTH           |
| ENSGALT00000011900 | CILP    | ENSGALT00000016995  | HPS3          |
| ENSGALT00000020622 | ADNP2   | ENSGALT00000017268  | PRKD3         |
| ENSGALT00000020625 |         | ENSGALT00000017274  | QPCT          |
| ENSGALT00000020631 |         | ENSGALT00000017275  |               |
| ENSGALT00000011910 | PARP16  | ENSGALT00000004361  | UHRF1B<br>P1  |
| ENSGALT00000028084 |         | ENSGALT00000017280  |               |
| ENSGALT00000020646 |         | ENSGALT00000018563  | SLC44A5       |
| ENSGALT00000012036 | DPP8    | ENSGALT00000017288  |               |
| ENSGALT00000020648 | NFATC1  | ENSGALT00000018575  | RABGGT<br>B   |
| ENSGALT00000024590 | CD164   | ENSGALT00000018582  | MSH4          |
| ENSGALT00000024673 | SESN1   | ENSGALT00000018456  | OXSM          |
| ENSGALT00000020670 | ALDH5A1 | ENSGALT00000018458  | LRRC3B        |
| ENSGALT00000020676 | MRS2    | ENSGALT00000004378  |               |
| ENSGALT00000020679 | NRSN1   | ENSGALT00000017328  | TFB2M         |
| ENSGALT00000020688 | CDKAL1  | ENSGALT00000004387  |               |
| ENSGALT00000024687 | FOXO3   | ENSGALT000000037849 |               |
| ENSGALT00000020693 | RNF144B | ENSGALT00000018603  | SLC4A7        |
| ENSGALT00000024698 | LACE1   | ENSGALT00000018638  | AZI2          |
| ENSGALT00000024702 |         | ENSGALT00000007643  | TNFAIP8<br>L3 |
| ENSGALT00000012111 |         | ENSGALT00000018667  | GADL1         |
| ENSGALT00000024713 |         | ENSGALT00000017370  |               |
| ENSGALT00000024718 | BEND3   | ENSGALT00000017414  | ZBTB18        |
| ENSGALT00000024723 |         | ENSGALT00000018707  | OSBPL10       |
| ENSGALT00000024761 | RTN4IP1 | ENSGALT00000023354  |               |
| ENSGALT00000012122 | DENND4A | ENSGALT00000018718  | GPD1L         |
| ENSGALT00000024849 |         | ENSGALT00000000338  | HEATR1        |
| ENSGALT00000020720 |         | ENSGALT00000004468  |               |
| ENSGALT00000037256 |         | ENSGALT00000017618  | ERO1LB        |
| ENSGALT00000024935 |         | ENSGALT00000018721  |               |
| ENSGALT00000024970 |         | ENSGALT00000017890  | NID1          |
| ENSGALT00000020725 | RANBP9  | ENSGALT00000018725  |               |
| ENSGALT00000012312 |         | ENSGALT00000018727  | CMTM6         |
| ENSGALT00000024980 | FBXL4   | ENSGALT00000035045  |               |
| ENSGALT00000012379 |         | ENSGALT00000004543  |               |
| ENSGALT00000012462 |         | ENSGALT00000018736  | TCAIM         |
| ENSGALT00000031683 |         | ENSGALT00000022610  | B3GALN        |

|                    |          |                    |               |
|--------------------|----------|--------------------|---------------|
|                    |          |                    | T2            |
| ENSGALT00000025147 | MAP3K7   | ENSGALT00000004102 | GGPS1         |
| ENSGALT00000020740 |          | ENSGALT00000000385 | ARID4B        |
| ENSGALT00000020742 |          | ENSGALT00000018770 | ANO10         |
| ENSGALT00000020743 |          | ENSGALT00000022567 | TOMM20        |
| ENSGALT00000020748 | ATXN1    | ENSGALT00000018780 |               |
| ENSGALT00000020760 | CAP2     | ENSGALT00000018812 | EAF1          |
| ENSGALT00000020766 | NUP153   | ENSGALT00000017944 |               |
| ENSGALT00000025160 | BACH2    | ENSGALT00000018839 |               |
| ENSGALT00000025170 |          | ENSGALT00000018846 | CAPN7         |
| ENSGALT00000025373 | MDN1     | ENSGALT00000007944 |               |
| ENSGALT00000020785 | EDN1     | ENSGALT00000018026 |               |
| ENSGALT00000020801 | NEDD9    | ENSGALT00000018061 | CCSAP         |
| ENSGALT00000025442 |          | ENSGALT00000009049 | CEP152        |
| ENSGALT00000020851 |          | ENSGALT00000018064 |               |
| ENSGALT00000020852 |          | ENSGALT00000018070 | NUP133        |
| ENSGALT00000020859 |          | ENSGALT00000005088 | TSPO2         |
| ENSGALT00000020862 | BMP6     | ENSGALT00000034280 | SECISBP<br>2L |
| ENSGALT00000025447 |          | ENSGALT00000018081 | TAF5L         |
| ENSGALT00000025457 | RNGTT    | ENSGALT00000018087 | URB2          |
| ENSGALT00000025464 |          | ENSGALT00000005108 | APOBEC<br>2   |
| ENSGALT00000025485 |          | ENSGALT00000018092 | GALNT2        |
| ENSGALT00000025493 |          | ENSGALT00000005134 |               |
| ENSGALT00000025521 |          | ENSGALT00000018903 | ATP2C1        |
| ENSGALT00000031045 |          | ENSGALT00000039833 |               |
| ENSGALT00000020881 |          | ENSGALT00000039832 |               |
| ENSGALT00000037148 |          | ENSGALT00000031841 | C1orf131      |
| ENSGALT00000020885 |          | ENSGALT00000018198 | GNPAT         |
| ENSGALT00000037229 |          | ENSGALT00000018210 |               |
| ENSGALT00000020890 | FARS2    | ENSGALT00000018940 |               |
| ENSGALT00000020897 | ECI2     | ENSGALT00000018217 |               |
| ENSGALT00000025551 | PRSS35   | ENSGALT00000018228 | FAM120B       |
| ENSGALT00000025559 | PGM3     | ENSGALT00000018250 | PHF10         |
| ENSGALT00000012808 |          | ENSGALT00000018251 |               |
| ENSGALT00000020905 | PXDC1    | ENSGALT00000019087 | DNAJC13       |
| ENSGALT00000020909 | SLC22A23 | ENSGALT00000018269 | SMOC2         |
| ENSGALT00000025575 | IBTK     | ENSGALT00000005461 | FRS3          |
| ENSGALT00000020914 |          | ENSGALT00000009208 |               |
| ENSGALT00000020918 | BPHL     | ENSGALT00000009244 |               |
| ENSGALT00000025610 | PHIP     | ENSGALT00000018417 | DACT2         |

|                    |           |                    |             |
|--------------------|-----------|--------------------|-------------|
| ENSGALT00000020938 |           | ENSGALT00000005500 |             |
| ENSGALT00000020945 | GMDS      | ENSGALT00000005492 | BYSL        |
| ENSGALT00000020947 | MYLK4     | ENSGALT00000009484 | USP8        |
| ENSGALT00000020983 |           | ENSGALT00000018633 | FGFR1O<br>P |
| ENSGALT00000025628 | FILIP1    | ENSGALT00000037674 |             |
| ENSGALT00000012883 |           | ENSGALT00000018720 |             |
| ENSGALT00000025629 |           | ENSGALT00000018857 | PARK2       |
| ENSGALT00000021025 | TNFRSF11A | ENSGALT00000018893 | MAP3K4      |
| ENSGALT00000025651 |           | ENSGALT00000005533 |             |
| ENSGALT00000025653 |           | ENSGALT00000019134 |             |
| ENSGALT00000025678 | KCNQ5     | ENSGALT00000038740 |             |
| ENSGALT00000025705 | ASRGL1    | ENSGALT00000037615 | CDV3        |
| ENSGALT00000012959 |           | ENSGALT00000009646 | FSD2        |
| ENSGALT00000021128 | MYO10     | ENSGALT00000009658 | WHAMM       |
| ENSGALT00000021151 | FAM105B   | ENSGALT00000009670 |             |
| ENSGALT00000021178 | TRIO      | ENSGALT00000037604 |             |
| ENSGALT00000021258 | MARCH6    | ENSGALT00000009692 |             |
| ENSGALT00000021280 | SBK2      | ENSGALT00000019273 | LZTFL1      |
| ENSGALT00000021302 | SEMA5A    | ENSGALT00000009702 |             |
| ENSGALT00000026230 | PHF3      | ENSGALT00000018986 |             |
| ENSGALT00000026237 |           | ENSGALT00000019010 |             |
| ENSGALT00000021306 | MTRR      | ENSGALT00000005608 |             |
| ENSGALT00000026245 |           | ENSGALT00000005617 | PRELP       |
| ENSGALT00000026251 | ZNF451    | ENSGALT00000019329 | SACM1L      |
| ENSGALT00000026264 | DST       | ENSGALT00000010337 |             |
| ENSGALT00000013227 | UACA      | ENSGALT00000019376 | LARS2       |
| ENSGALT00000021443 |           | ENSGALT00000019061 | WTAP        |
| ENSGALT00000021447 |           | ENSGALT00000019062 |             |
| ENSGALT00000021448 | TMEM245   | ENSGALT00000019065 | FNDC1       |
| ENSGALT00000026295 |           | ENSGALT00000031806 |             |
| ENSGALT00000026298 | MLIP      | ENSGALT00000020066 | FBXO30      |
| ENSGALT00000026310 | KLHL31    | ENSGALT00000019393 | ZDHHC3      |
| ENSGALT00000021488 |           | ENSGALT00000020159 | STXBP5      |
| ENSGALT00000026320 | GCLC      | ENSGALT00000020165 | SASH1       |
| ENSGALT00000021491 |           | ENSGALT00000020182 | TAB2        |
| ENSGALT00000026321 |           | ENSGALT00000020197 |             |
| ENSGALT00000021505 |           | ENSGALT00000010528 |             |
| ENSGALT00000026329 |           | ENSGALT00000020225 | NUP43       |
| ENSGALT00000026331 | ICK       | ENSGALT00000037591 |             |
| ENSGALT00000021546 |           | ENSGALT00000031799 | LRP11       |
| ENSGALT00000021552 | NDUFS6    | ENSGALT00000020231 | PPP1R14     |

|                    |          |                    |         |
|--------------------|----------|--------------------|---------|
| ENSGALT00000026340 | AGPAT5   | ENSGALT00000020285 | C       |
| ENSGALT00000026360 |          | ENSGALT00000037581 | MTHFD1  |
| ENSGALT00000021557 | ANKS6    | ENSGALT00000019473 | L       |
| ENSGALT00000021568 | ELP2     | ENSGALT00000022138 | AKAP12  |
| ENSGALT00000026373 | ARHGEF10 | ENSGALT00000019478 | TRAK1   |
| ENSGALT00000031625 |          | ENSGALT00000022168 | FBXO5   |
| ENSGALT00000026385 |          | ENSGALT00000022182 | EIF1B   |
| ENSGALT00000026390 | FBXO25   | ENSGALT00000019495 | SCAF8   |
| ENSGALT00000021578 | SLC39A6  | ENSGALT00000022196 | TFB1M   |
| ENSGALT00000026395 |          | ENSGALT00000022259 | TMEM24  |
| ENSGALT00000013352 |          | ENSGALT00000022265 | 2       |
| ENSGALT00000013365 |          | ENSGALT00000022291 | ZDHHC1  |
| ENSGALT00000026413 | PXDN     | ENSGALT00000010812 | 4       |
| ENSGALT00000021854 | PDCD6    | ENSGALT00000019569 | SNX9    |
| ENSGALT00000021913 |          | ENSGALT00000022311 | ABHD2   |
| ENSGALT00000021930 | ERP44    | ENSGALT00000022325 | SYNJ2   |
| ENSGALT00000015891 |          | ENSGALT00000031788 | TMEM18  |
| ENSGALT00000021943 |          | ENSGALT00000010834 | 1       |
| ENSGALT00000022087 | NR4A3    | ENSGALT00000019676 | DYNLT1  |
| ENSGALT00000022096 |          | ENSGALT00000034015 | ARPP21  |
| ENSGALT00000022115 | BLOC1S4  | ENSGALT00000022346 | HAPLN3  |
| ENSGALT00000022120 | PARD6G   | ENSGALT00000022358 | PLAGL1  |
| ENSGALT00000022165 |          | ENSGALT00000010909 | LTV1    |
| ENSGALT00000026493 | CPSF3    | ENSGALT00000022362 | DET1    |
| ENSGALT00000015890 |          | ENSGALT00000022368 | PHACTR  |
| ENSGALT00000022178 | ACOT13   | ENSGALT00000019702 | 2       |
| ENSGALT00000026523 |          | ENSGALT00000022374 | FUCA2   |
| ENSGALT00000026524 |          | ENSGALT00000031785 | MLH1    |
| ENSGALT00000036936 | ZADH2    | ENSGALT00000022379 | PEX3    |
| ENSGALT00000013464 | TMED3    | ENSGALT00000022415 | ADAT2   |
| ENSGALT00000022283 | FAM69C   | ENSGALT00000019716 | AIG1    |
| ENSGALT00000021988 | PPP6R2   | ENSGALT00000022435 | VTA1    |
| ENSGALT00000020337 | SBF1     | ENSGALT00000011024 | EPDR1   |
| ENSGALT00000022290 | TIMM21   | ENSGALT00000022483 | HECA    |
| ENSGALT00000040414 |          | ENSGALT00000031776 | AGBL1   |
| ENSGALT00000025383 |          | ENSGALT00000011148 | TNFAIP3 |



|                    |         |                    |              |
|--------------------|---------|--------------------|--------------|
| ENSGALT00000026538 | PDIA6   | ENSGALT00000022499 |              |
| ENSGALT00000022432 | TNPO3   | ENSGALT00000011156 | FAM174B      |
| ENSGALT00000012929 | AHCYL2  | ENSGALT00000011260 | CHD2         |
| ENSGALT00000012955 |         | ENSGALT00000022522 | MAP3K5       |
| ENSGALT00000013005 | KLHDC10 | ENSGALT00000038512 | FAM169B      |
| ENSGALT00000022519 | RNMT    | ENSGALT00000019843 | HERPUD<br>2  |
| ENSGALT00000022497 | SEH1L   | ENSGALT00000022595 | PDE7B        |
| ENSGALT00000022508 | CEP192  | ENSGALT00000022607 | AHI1         |
| ENSGALT00000013037 | TMEM209 | ENSGALT00000019858 |              |
| ENSGALT00000026552 |         | ENSGALT00000022653 | SLC2A12      |
| ENSGALT00000013516 |         | ENSGALT00000019894 |              |
| ENSGALT00000022485 | PSMG2   | ENSGALT00000022671 |              |
| ENSGALT00000013533 | UNC45A  | ENSGALT00000019908 |              |
| ENSGALT00000013568 | MAN2A2  | ENSGALT00000037476 |              |
| ENSGALT00000026569 | SMC6    | ENSGALT00000004596 |              |
| ENSGALT00000022445 |         | ENSGALT00000004590 |              |
| ENSGALT00000022420 | IMPA2   | ENSGALT00000031116 | RP9          |
| ENSGALT00000031591 | RDH14   | ENSGALT00000004401 | MED23        |
| ENSGALT00000026575 |         | ENSGALT00000019924 | KBTBD2       |
| ENSGALT00000013284 | FAM208B | ENSGALT00000011432 |              |
| ENSGALT00000026589 | SDC1    | ENSGALT00000019935 | LSM5         |
| ENSGALT00000022579 | NAPG    | ENSGALT00000011484 | LYSMD4       |
| ENSGALT00000028442 |         | ENSGALT00000022702 | ARHGAP<br>18 |
| ENSGALT00000033559 | RAB31   | ENSGALT00000022704 | LAMA2        |
| ENSGALT00000013703 | PPP4R1  | ENSGALT00000023937 | ECHDC1       |
| ENSGALT00000013581 |         | ENSGALT00000020038 | LRRFIP2      |
| ENSGALT00000013684 |         | ENSGALT00000023965 | TRDN         |
| ENSGALT00000013683 | ANKRD12 | ENSGALT00000023984 | SMPDL3<br>A  |
| ENSGALT00000026614 |         | ENSGALT00000023989 |              |
| ENSGALT00000023134 | NDUFV2  | ENSGALT00000020113 | YAE1D1       |
| ENSGALT00000031579 | C2orf44 | ENSGALT00000011601 |              |
| ENSGALT00000026617 |         | ENSGALT00000037441 | MPLKIP       |
| ENSGALT00000013589 |         | ENSGALT00000011612 |              |
| ENSGALT00000013794 | SLC35B4 | ENSGALT00000020152 | C7orf25      |
| ENSGALT00000013813 |         | ENSGALT00000031107 |              |
| ENSGALT00000010489 | CHCHD3  | ENSGALT00000011615 | PCSK6        |
| ENSGALT00000013724 | MAP1A   | ENSGALT00000011730 |              |
| ENSGALT00000040160 |         | ENSGALT00000020177 |              |
| ENSGALT00000014003 | IQGAP1  | ENSGALT00000024023 | CEP85L       |

|                    |         |                    |          |
|--------------------|---------|--------------------|----------|
| ENSGALT00000010225 | PFKFB3  | ENSGALT00000020178 | BLVRA    |
| ENSGALT00000040107 | PRKCQ   | ENSGALT00000024033 | NUS1     |
| ENSGALT00000011162 | ITIH5   | ENSGALT00000020187 | LANCL2   |
| ENSGALT00000010913 |         | ENSGALT00000037413 |          |
| ENSGALT00000023972 |         | ENSGALT00000024036 | GOPC     |
| ENSGALT00000036879 |         | ENSGALT00000024042 | DCBLD1   |
| ENSGALT00000026630 | ZNF512  | ENSGALT00000020200 | TPK1     |
| ENSGALT00000026632 | FNDC4   | ENSGALT00000024059 |          |
| ENSGALT00000010889 |         | ENSGALT00000020295 |          |
| ENSGALT00000010831 | PROSER2 | ENSGALT00000011754 |          |
| ENSGALT00000010817 | UPF2    | ENSGALT00000020338 |          |
| ENSGALT00000005822 | DHTKD1  | ENSGALT00000020352 |          |
| ENSGALT00000022642 | SEC61A2 | ENSGALT00000024093 | KPNA5    |
| ENSGALT00000026641 |         | ENSGALT00000031095 |          |
| ENSGALT00000022732 | CDC123  | ENSGALT00000035373 |          |
| ENSGALT00000026651 | SNX17   | ENSGALT00000031721 |          |
| ENSGALT00000016041 | CAMK1D  | ENSGALT00000024128 |          |
| ENSGALT00000022327 |         | ENSGALT00000024130 | DSE      |
| ENSGALT00000023489 | PHYH    | ENSGALT00000024132 | NT5DC1   |
| ENSGALT00000006362 |         | ENSGALT00000020442 | BRD9     |
| ENSGALT00000023502 |         | ENSGALT00000020444 | TPPP     |
| ENSGALT00000010765 | FRMD4A  | ENSGALT00000020449 | LRRC14B  |
| ENSGALT00000023921 | EMILIN2 | ENSGALT00000020597 | COL15A1  |
| ENSGALT00000029187 |         | ENSGALT00000024248 | KIAA1919 |
| ENSGALT00000036791 |         | ENSGALT00000024256 | SLC16A1  |
| ENSGALT00000030754 |         | ENSGALT00000024267 | 0        |
| ENSGALT00000026684 |         | ENSGALT00000020598 |          |
| ENSGALT00000010596 |         | ENSGALT00000011900 | CILP     |
| ENSGALT00000026714 | HADHB   | ENSGALT00000020610 | RECK     |
| ENSGALT00000026723 |         | ENSGALT00000020622 | ADNP2    |
| ENSGALT00000013777 |         | ENSGALT00000020625 |          |
| ENSGALT00000039749 |         | ENSGALT00000020631 |          |
| ENSGALT00000023980 |         | ENSGALT00000024288 | DDO      |
| ENSGALT00000026748 |         | ENSGALT00000011910 | PARP16   |
| ENSGALT00000026763 | SCARA5  | ENSGALT00000028084 |          |
| ENSGALT00000013557 |         | ENSGALT00000020646 |          |
| ENSGALT00000013555 | RSBN1L  | ENSGALT00000012036 | DPP8     |
| ENSGALT00000013546 | PTPN12  | ENSGALT00000020648 | NFATC1   |
| ENSGALT00000026776 | SLC35F6 | ENSGALT00000024590 | CD164    |
| ENSGALT00000013530 | GSAP    | ENSGALT00000020670 | ALDH5A1  |
| ENSGALT00000013515 | FAM185A | ENSGALT00000020676 | MRS2     |

|                    |         |                    |             |
|--------------------|---------|--------------------|-------------|
| ENSGALT00000013482 |         | ENSGALT00000020679 | NRSN1       |
| ENSGALT00000013473 |         | ENSGALT00000020688 | CDKAL1      |
| ENSGALT00000013428 |         | ENSGALT00000024687 | FOXO3       |
| ENSGALT00000013382 |         | ENSGALT00000020695 |             |
| ENSGALT00000024064 | USP14   | ENSGALT00000024698 | LACE1       |
| ENSGALT00000013290 |         | ENSGALT00000024702 |             |
| ENSGALT00000013259 | KMT2E   | ENSGALT00000012111 |             |
| ENSGALT00000026827 | ZNF395  | ENSGALT00000024713 |             |
| ENSGALT00000013245 | SRPK2   | ENSGALT00000024718 | BEND3       |
| ENSGALT00000013186 |         | ENSGALT00000024723 |             |
| ENSGALT00000013172 | ATXN7L1 | ENSGALT00000024823 |             |
| ENSGALT00000026845 | EXTL3   | ENSGALT00000024849 |             |
| ENSGALT00000026848 |         | ENSGALT00000020720 |             |
| ENSGALT00000013116 |         | ENSGALT00000037256 |             |
| ENSGALT00000013062 |         | ENSGALT00000024935 |             |
| ENSGALT00000026872 | XKR6    | ENSGALT00000024942 | TSTD1       |
| ENSGALT00000039460 | DUS4L   | ENSGALT00000024970 |             |
| ENSGALT00000026875 |         | ENSGALT00000024973 | COQ3        |
| ENSGALT00000026878 |         | ENSGALT00000020725 | RANBP9      |
| ENSGALT00000013000 |         | ENSGALT00000012312 |             |
| ENSGALT00000024152 | MIB1    | ENSGALT00000024980 | FBXL4       |
| ENSGALT00000026894 |         | ENSGALT00000012364 | DIS3L       |
| ENSGALT00000031549 |         | ENSGALT00000031690 | NDUFAF<br>4 |
| ENSGALT00000024169 | RBBP8   | ENSGALT00000025106 |             |
| ENSGALT00000012832 | LAMB1   | ENSGALT00000012379 |             |
| ENSGALT00000026905 | TRAM2   | ENSGALT00000012462 |             |
| ENSGALT00000024197 | RIOK3   | ENSGALT00000020734 | MCUR1       |
| ENSGALT00000011632 |         | ENSGALT00000031683 |             |
| ENSGALT00000024206 | C18orf8 | ENSGALT00000025147 | MAP3K7      |
| ENSGALT00000011493 | KIF21A  | ENSGALT00000020740 |             |
| ENSGALT00000026946 | MUT     | ENSGALT00000012470 |             |
| ENSGALT00000024240 | NPC1    | ENSGALT00000020743 |             |
| ENSGALT00000026953 |         | ENSGALT00000020748 | ATXN1       |
| ENSGALT00000031528 | CLIC5   | ENSGALT00000020752 |             |
| ENSGALT00000026965 | RCAN2   | ENSGALT00000020760 | CAP2        |
| ENSGALT00000026967 | CYP39A1 | ENSGALT00000020766 | NUP153      |
| ENSGALT00000013914 |         | ENSGALT00000025170 |             |
| ENSGALT00000013929 |         | ENSGALT00000025373 | MDN1        |
| ENSGALT00000026980 | GPR116  | ENSGALT00000020779 | TBC1D7      |
| ENSGALT00000039200 | PIM3    | ENSGALT00000025418 |             |
| ENSGALT00000014167 |         | ENSGALT00000012541 | ZWILCH      |

|                    |          |                    |               |
|--------------------|----------|--------------------|---------------|
| ENSGALT00000014151 |          | ENSGALT00000020785 | EDN1          |
| ENSGALT00000024335 | OSBPL1A  | ENSGALT00000020801 | NEDD9         |
| ENSGALT00000021457 | PLXNB2   | ENSGALT00000025442 |               |
| ENSGALT00000024382 | ZNF521   | ENSGALT00000020851 |               |
| ENSGALT00000024407 | KCTD1    | ENSGALT00000020852 |               |
| ENSGALT00000014328 | ASB15    | ENSGALT00000020859 |               |
| ENSGALT00000014337 |          | ENSGALT00000020862 | BMP6          |
| ENSGALT00000014340 | IQUB     | ENSGALT00000025447 |               |
| ENSGALT00000014357 |          | ENSGALT00000025457 | RNGTT         |
| ENSGALT00000014559 | AASS     | ENSGALT00000037170 |               |
| ENSGALT00000014601 |          | ENSGALT00000025464 |               |
| ENSGALT00000014754 |          | ENSGALT00000025485 |               |
| ENSGALT00000014827 |          | ENSGALT00000025521 |               |
| ENSGALT00000014836 |          | ENSGALT00000020881 |               |
| ENSGALT00000015281 |          | ENSGALT00000025528 | NT5E          |
| ENSGALT00000015293 |          | ENSGALT00000037148 |               |
| ENSGALT00000024463 | TRAPPC8  | ENSGALT00000020885 |               |
| ENSGALT00000015373 | TMEM168  | ENSGALT00000037229 |               |
| ENSGALT00000030698 | LSMEM1   | ENSGALT00000020890 | FARS2         |
| ENSGALT00000015379 |          | ENSGALT00000020897 | ECI2          |
| ENSGALT00000015454 |          | ENSGALT00000025551 | PRSS35        |
| ENSGALT00000015471 |          | ENSGALT00000025559 | PGM3          |
| ENSGALT00000015532 |          | ENSGALT00000012808 |               |
| ENSGALT00000015558 | PRICKLE1 | ENSGALT00000020904 | PRPF4B        |
| ENSGALT00000015593 | ADAMTS20 | ENSGALT00000020905 | PXDC1         |
| ENSGALT00000015605 | PUS7L    | ENSGALT00000025575 | IBTK          |
| ENSGALT00000015635 |          | ENSGALT00000020914 |               |
| ENSGALT00000015636 | TMEM117  | ENSGALT00000020918 | BPHL          |
| ENSGALT00000015694 | ANO6     | ENSGALT00000025610 | PHIP          |
| ENSGALT00000015735 | ARID2    | ENSGALT00000020938 |               |
| ENSGALT00000015787 |          | ENSGALT00000020945 | GMDS          |
| ENSGALT00000015837 |          | ENSGALT00000020947 | MYLK4         |
| ENSGALT00000024545 | DTNA     | ENSGALT00000020983 |               |
| ENSGALT00000015861 |          | ENSGALT00000012856 | C15orf61      |
| ENSGALT00000015878 |          | ENSGALT00000025628 | FILIP1        |
| ENSGALT00000015976 |          | ENSGALT00000025629 |               |
| ENSGALT00000015981 | RPL18A   | ENSGALT00000031654 |               |
| ENSGALT00000016025 |          | ENSGALT00000021007 |               |
| ENSGALT00000038638 |          | ENSGALT00000021025 | TNFRSF1<br>1A |
| ENSGALT00000016059 |          | ENSGALT00000021033 | KIAA1468      |
| ENSGALT00000016099 | CAND1    | ENSGALT00000012956 |               |

|                    |         |                    |         |
|--------------------|---------|--------------------|---------|
| ENSGALT00000016139 |         | ENSGALT00000025651 |         |
| ENSGALT00000016160 |         | ENSGALT00000025653 |         |
| ENSGALT00000016192 |         | ENSGALT00000025678 | KCNQ5   |
| ENSGALT00000021064 | MCM4    | ENSGALT00000025705 | ASRGL1  |
| ENSGALT00000016330 | PTPRB   | ENSGALT00000012959 |         |
| ENSGALT00000041400 | C8orf22 | ENSGALT00000021151 | FAM105B |
| ENSGALT00000016545 | ZFC3H1  | ENSGALT00000021178 | TRIO    |
| ENSGALT00000016553 | RAB21   | ENSGALT00000013051 | CORO2B  |
| ENSGALT00000024628 | RB1CC1  | ENSGALT00000021258 | MARCH6  |
| ENSGALT00000022162 |         | ENSGALT00000021277 |         |
| ENSGALT00000016625 |         | ENSGALT00000021280 | SBK2    |
| ENSGALT00000016660 | OSBPL8  | ENSGALT00000021302 | SEMA5A  |
| ENSGALT00000017803 | LIN7A   | ENSGALT00000026230 | PHF3    |
| ENSGALT00000024757 |         | ENSGALT00000026237 |         |
| ENSGALT00000029932 |         | ENSGALT00000021306 | MTRR    |
| ENSGALT00000024867 |         | ENSGALT00000021307 | FASTKD3 |
| ENSGALT00000024871 | PENK    | ENSGALT00000026245 |         |
| ENSGALT00000024873 | IMPAD1  | ENSGALT00000026251 | ZNF451  |
| ENSGALT00000024899 |         | ENSGALT00000026253 | BEND6   |
| ENSGALT00000024908 | NSMAF   | ENSGALT00000026264 | DST     |
| ENSGALT00000018221 | CEP290  | ENSGALT00000013227 | UACA    |
| ENSGALT00000018392 |         | ENSGALT00000033617 |         |
| ENSGALT00000018400 |         | ENSGALT00000021443 |         |
| ENSGALT00000018404 | EEA1    | ENSGALT00000021448 | TMEM24  |
| ENSGALT00000018413 |         |                    | 5       |
| ENSGALT00000030642 |         | ENSGALT00000026298 | MLIP    |
| ENSGALT00000024965 | ASPH    | ENSGALT00000026310 | KLHL31  |
| ENSGALT00000024998 | GGH     | ENSGALT00000021488 |         |
| ENSGALT00000030640 | CCDC41  | ENSGALT00000026320 | GCLC    |
| ENSGALT00000018472 | TMCC3   | ENSGALT00000021491 |         |
| ENSGALT00000018479 |         | ENSGALT00000026321 |         |
| ENSGALT00000018529 | VEZT    | ENSGALT00000021505 |         |
| ENSGALT00000025000 |         | ENSGALT00000026329 |         |
| ENSGALT00000025023 |         | ENSGALT00000026331 | ICK     |
| ENSGALT00000022941 | ADHFE1  | ENSGALT00000021546 |         |
| ENSGALT00000018595 | USP44   | ENSGALT00000021552 | NDUFS6  |
| ENSGALT00000018639 |         | ENSGALT00000026340 | AGPAT5  |
| ENSGALT00000025029 |         | ENSGALT00000026360 |         |
| ENSGALT00000018679 | CDK17   | ENSGALT00000021557 | ANKS6   |
| ENSGALT00000018716 |         | ENSGALT00000021558 | GALNT12 |
| ENSGALT00000023424 |         | ENSGALT00000021568 | ELP2    |
|                    |         | ENSGALT00000031625 |         |

|                    |         |                    |         |
|--------------------|---------|--------------------|---------|
| ENSGALT00000025048 | CSPPI   | ENSGALT00000026385 |         |
| ENSGALT00000025075 | ARFGEF1 | ENSGALT00000026390 | FBXO25  |
| ENSGALT00000018870 |         | ENSGALT00000021578 | SLC39A6 |
| ENSGALT00000025131 | SLCO5A1 | ENSGALT00000026395 |         |
| ENSGALT00000025181 |         | ENSGALT00000013336 |         |
| ENSGALT00000030884 | MSC     | ENSGALT00000013352 |         |
| ENSGALT00000019040 |         | ENSGALT00000013365 |         |
| ENSGALT00000019063 | NUP205  | ENSGALT00000026413 | PXDN    |
| ENSGALT00000025372 |         | ENSGALT00000021854 | PDCD6   |
| ENSGALT00000025374 | ZC2HC1A | ENSGALT00000021913 |         |
| ENSGALT00000025468 |         | ENSGALT00000021930 | ERP44   |
| ENSGALT00000025499 | LRRCC1  | ENSGALT00000015891 |         |
| ENSGALT00000025504 | CA13    | ENSGALT00000021943 |         |
| ENSGALT00000019173 |         | ENSGALT00000022087 | NR4A3   |
| ENSGALT00000019245 |         | ENSGALT00000022115 | BLOC1S4 |
| ENSGALT00000019256 |         | ENSGALT00000022120 | PARD6G  |
| ENSGALT00000030620 |         | ENSGALT00000022135 |         |
| ENSGALT00000025563 |         | ENSGALT00000022165 |         |
| ENSGALT00000025572 |         | ENSGALT00000022169 |         |
| ENSGALT00000019301 | PLBD1   | ENSGALT00000026493 | CPSF3   |
| ENSGALT00000019343 | C7orf55 | ENSGALT00000015890 |         |
| ENSGALT00000030617 |         | ENSGALT00000022178 | ACOT13  |
| ENSGALT00000019356 |         | ENSGALT00000015860 | ARSA    |
| ENSGALT00000019412 |         | ENSGALT00000026523 |         |
| ENSGALT00000019419 | FAM109B | ENSGALT00000026524 |         |
| ENSGALT00000019442 | SREBF2  | ENSGALT00000026525 | RRM2    |
| ENSGALT00000019444 | CCDC134 | ENSGALT00000036936 | ZADH2   |
| ENSGALT00000025647 | DECR1   | ENSGALT00000013464 | TMED3   |
| ENSGALT00000019461 | NHP2L1  | ENSGALT00000022283 | FAM69C  |
| ENSGALT00000019464 | DESI1   | ENSGALT00000021988 | PPP6R2  |
| ENSGALT00000019482 | PMM1    | ENSGALT00000020337 | SBF1    |
| ENSGALT00000019494 |         | ENSGALT00000022290 | TIMM21  |
| ENSGALT00000019497 |         | ENSGALT00000040414 |         |
| ENSGALT00000019502 |         | ENSGALT00000026538 | PDIA6   |
| ENSGALT00000037963 |         | ENSGALT00000022432 | TNPO3   |
| ENSGALT00000019514 | ZC3H7B  | ENSGALT00000012929 | AHCYL2  |
| ENSGALT00000025676 |         | ENSGALT00000012992 |         |
| ENSGALT00000025692 |         | ENSGALT00000013005 | KLHDC10 |
| ENSGALT00000025711 |         | ENSGALT00000022519 | RNMT    |
| ENSGALT00000019565 |         | ENSGALT00000022497 | SEH1L   |
| ENSGALT00000019589 | XPNPEP3 | ENSGALT00000022508 | CEP192  |
| ENSGALT00000019595 |         | ENSGALT00000013037 | TMEM20  |

|                    |         |                    |             |
|--------------------|---------|--------------------|-------------|
| ENSGALT00000025714 | RNF151  | ENSGALT00000026552 |             |
| ENSGALT00000025742 | DPY19L4 | ENSGALT00000013516 |             |
| ENSGALT00000030837 | NDUFAF6 | ENSGALT00000022485 | PSMG2       |
| ENSGALT00000025765 |         | ENSGALT00000013533 | UNC45A      |
| ENSGALT00000025772 |         | ENSGALT00000013568 | MAN2A2      |
| ENSGALT00000025777 |         | ENSGALT00000026569 | SMC6        |
| ENSGALT00000036623 | MTDH    | ENSGALT00000022445 |             |
| ENSGALT00000023439 | MATN2   | ENSGALT00000013228 | COPG2       |
| ENSGALT00000037892 |         | ENSGALT00000022420 | IMPA2       |
| ENSGALT00000019837 | MIEF1   | ENSGALT00000031591 | RDH14       |
| ENSGALT00000019854 |         | ENSGALT00000026575 |             |
| ENSGALT00000029404 | HRSP12  | ENSGALT00000026577 |             |
| ENSGALT00000025801 |         | ENSGALT00000013284 | FAM208B     |
| ENSGALT00000030604 |         | ENSGALT00000026582 | TTC32       |
| ENSGALT00000019957 | JOSD1   | ENSGALT00000026589 | SDC1        |
| ENSGALT00000030826 |         | ENSGALT00000022385 |             |
| ENSGALT00000030825 | POLR2K  | ENSGALT00000022579 | NAPG        |
| ENSGALT00000025842 | RNF19A  | ENSGALT00000028442 |             |
| ENSGALT00000028271 | ANKRD46 | ENSGALT00000033559 | RAB31       |
| ENSGALT00000023333 |         | ENSGALT00000013703 | PPP4R1      |
| ENSGALT00000020049 |         | ENSGALT00000013581 |             |
| ENSGALT00000025855 | RRM2B   | ENSGALT00000013684 |             |
| ENSGALT00000030592 | PICK1   | ENSGALT00000013683 | ANKRD1<br>2 |
| ENSGALT00000025850 | UBR5    | ENSGALT00000026614 |             |
| ENSGALT00000020100 | ANKRD54 | ENSGALT00000023134 | NDUFV2      |
| ENSGALT00000020120 |         | ENSGALT00000031579 | C2orf44     |
| ENSGALT00000020453 |         | ENSGALT00000026617 |             |
| ENSGALT00000025898 |         | ENSGALT00000013589 |             |
| ENSGALT00000020484 |         | ENSGALT00000013664 | PPIP5K1     |
| ENSGALT00000037765 |         | ENSGALT00000013794 | SLC35B4     |
| ENSGALT00000020498 |         | ENSGALT00000013813 |             |
| ENSGALT00000020504 | HMGXB4  | ENSGALT00000010489 | CHCHD3      |
| ENSGALT00000025906 | LRP12   | ENSGALT00000013724 | MAP1A       |
| ENSGALT00000025930 |         | ENSGALT00000040160 |             |
| ENSGALT00000025937 |         | ENSGALT00000014003 | IQGAP1      |
| ENSGALT00000020590 | RTCB    | ENSGALT00000010225 | PFKFB3      |
| ENSGALT00000020600 | PRDM4   | ENSGALT00000040107 | PRKCC       |
| ENSGALT00000030816 |         | ENSGALT00000011162 | ITIH5       |
| ENSGALT00000025971 |         | ENSGALT00000010913 |             |
| ENSGALT00000025969 | UTP23   | ENSGALT00000023972 |             |

|                    |          |                    |             |
|--------------------|----------|--------------------|-------------|
| ENSGALT00000025965 |          | ENSGALT00000023964 |             |
| ENSGALT00000020629 |          | ENSGALT00000036879 |             |
| ENSGALT00000020633 | RIC8B    | ENSGALT00000026630 | ZNF512      |
| ENSGALT00000026501 |          | ENSGALT00000026632 | FNDC4       |
| ENSGALT00000026492 | TAF2     | ENSGALT00000010889 |             |
| ENSGALT00000020668 | NUAK1    | ENSGALT00000010831 | PROSER<br>2 |
| ENSGALT00000026475 |          | ENSGALT00000010817 | UPF2        |
| ENSGALT00000020714 |          | ENSGALT00000005822 | DHTKD1      |
| ENSGALT00000026431 |          | ENSGALT00000022642 | SEC61A2     |
| ENSGALT00000026425 | TBC1D31  | ENSGALT00000026641 |             |
| ENSGALT00000020683 |          | ENSGALT00000022732 | CDC123      |
| ENSGALT00000026409 | ATAD2    | ENSGALT00000026651 | SNX17       |
| ENSGALT00000026383 | FAM91A1  | ENSGALT00000016041 | CAMK1D      |
| ENSGALT00000026325 | KIAA0196 | ENSGALT00000022327 |             |
| ENSGALT00000026313 | TRIB1    | ENSGALT00000023489 | PHYH        |
| ENSGALT00000020764 | HCFC2    | ENSGALT00000006362 |             |
| ENSGALT00000020765 |          | ENSGALT00000023502 |             |
| ENSGALT00000026309 |          | ENSGALT00000010765 | FRMD4A      |
| ENSGALT00000020769 |          | ENSGALT00000023921 | EMILIN2     |
| ENSGALT00000030784 | FAM49B   | ENSGALT00000029187 |             |
| ENSGALT00000020773 |          | ENSGALT00000036791 |             |
| ENSGALT00000020783 | NT5DC3   | ENSGALT00000026684 |             |
| ENSGALT00000026194 |          | ENSGALT00000010596 |             |
| ENSGALT00000020821 |          | ENSGALT00000026714 | HADHB       |
| ENSGALT00000020822 | CCDC53   | ENSGALT00000026723 |             |
| ENSGALT00000020826 | GNPTAB   | ENSGALT00000013777 |             |
| ENSGALT00000020835 |          | ENSGALT00000039749 |             |
| ENSGALT00000026120 | KHDRBS3  | ENSGALT00000026740 |             |
| ENSGALT00000020864 | PARP12   | ENSGALT00000023980 |             |
| ENSGALT00000020873 | HIPK2    | ENSGALT00000024028 | TYMS        |
| ENSGALT00000026092 | AGO2     | ENSGALT00000026763 | SCARA5      |
| ENSGALT00000020879 | KIAA1549 | ENSGALT00000013567 |             |
| ENSGALT00000026043 | PTP4A3   | ENSGALT00000026767 | PBK         |
| ENSGALT00000026040 | TSNARE1  | ENSGALT00000013557 |             |
| ENSGALT00000026012 |          | ENSGALT00000026773 | CCDC25      |
| ENSGALT00000026001 | RHPN1    | ENSGALT00000013555 | RSBN1L      |
| ENSGALT00000020934 |          | ENSGALT00000013546 | PTPN12      |
| ENSGALT00000020949 |          | ENSGALT00000026776 | SLC35F6     |
| ENSGALT00000020953 | KDM7A    | ENSGALT00000013530 | GSAP        |
| ENSGALT00000020957 |          | ENSGALT00000013515 | FAM185A     |
| ENSGALT00000020962 |          | ENSGALT00000013512 |             |



|                    |          |                    |
|--------------------|----------|--------------------|
| ENSGALT00000020996 | AGK      | ENSGALT00000013482 |
| ENSGALT00000000104 | NRBP2    | ENSGALT00000013473 |
| ENSGALT00000021056 | SYT10    | ENSGALT00000013428 |
| ENSGALT00000021073 | YARS2    | ENSGALT00000013382 |
| ENSGALT00000021086 |          | ENSGALT00000024064 |
| ENSGALT00000021103 | AMN1     | USP14              |
| ENSGALT00000021115 |          | ENSGALT00000013290 |
| ENSGALT00000021125 | IPO8     | ENSGALT00000013259 |
| ENSGALT00000021134 | TMTC1    | KMT2E              |
| ENSGALT00000030549 |          | ENSGALT00000026827 |
| ENSGALT00000021202 | B4GALNT3 | ZNF395             |
| ENSGALT00000021213 | ERC1     | ENSGALT00000013245 |
| ENSGALT00000021246 | DCP1B    | SRPK2              |
| ENSGALT00000021270 | CECR5    | ENSGALT00000026845 |
| ENSGALT00000021281 |          | EXTL3              |
| ENSGALT00000021282 | BCL2L13  | ENSGALT00000026848 |
| ENSGALT00000021284 |          | ENSGALT00000013116 |
| ENSGALT00000021332 |          | ENSGALT00000026852 |
| ENSGALT00000021337 |          | HMBOX1             |
| ENSGALT00000005490 |          | ENSGALT00000013062 |
| ENSGALT00000021340 |          | ENSGALT00000026872 |
| ENSGALT00000021369 | EPS8     | XKR6               |
| ENSGALT00000021374 |          | ENSGALT00000039460 |
| ENSGALT00000021380 |          | DUS4L              |
| ENSGALT00000021444 | AEBP2    | ENSGALT00000026875 |
| ENSGALT00000021521 | BCAT1    | ENSGALT00000026878 |
| ENSGALT00000021594 |          | ENSGALT00000013000 |
| ENSGALT00000021607 | CMAS     | ENSGALT00000024095 |
| ENSGALT00000021626 | ABCC9    | ABHD3              |
| ENSGALT00000022726 |          | ENSGALT00000024152 |
| ENSGALT00000022736 | RASSF8   | MIB1               |
| ENSGALT00000022738 | SSPN     | ENSGALT00000026894 |
| ENSGALT00000022808 | TM7SF3   | ENSGALT00000031549 |
| ENSGALT00000022820 |          | ENSGALT00000024169 |
| ENSGALT00000022856 | CYB5R3   | RBBP8              |
| ENSGALT00000022912 |          | ENSGALT00000012832 |
| ENSGALT00000022959 |          | LAMB1              |
| ENSGALT00000022966 | PARVB    | ENSGALT00000026905 |
| ENSGALT00000022984 |          | TRAM2              |
| ENSGALT00000022998 |          | ENSGALT00000024186 |
| ENSGALT00000023003 | KIAA0930 | CABLES1            |
| ENSGALT00000023014 |          | ENSGALT00000024197 |
|                    |          | RIOK3              |
|                    |          | ENSGALT00000011632 |
|                    |          | ENSGALT00000026909 |
|                    |          | ENSGALT00000024206 |
|                    |          | C18orf8            |
|                    |          | ENSGALT00000011493 |
|                    |          | KIF21A             |
|                    |          | ENSGALT00000026922 |
|                    |          | ENSGALT00000026946 |
|                    |          | MUT                |
|                    |          | ENSGALT00000024240 |
|                    |          | NPC1               |
|                    |          | ENSGALT00000026953 |
|                    |          | ENSGALT00000031528 |
|                    |          | CLIC5              |
|                    |          | ENSGALT00000026965 |
|                    |          | RCAN2              |
|                    |          | ENSGALT00000026967 |
|                    |          | CYP39A1            |
|                    |          | ENSGALT00000013914 |
|                    |          | ENSGALT00000013929 |
|                    |          | ENSGALT00000039200 |
|                    |          | PIM3               |

|                    |           |                    |              |
|--------------------|-----------|--------------------|--------------|
| ENSGALT00000023016 | ATXN10    | ENSGALT00000027001 |              |
| ENSGALT00000015796 |           | ENSGALT00000024304 | TTC39C       |
| ENSGALT00000018841 | LRP6      | ENSGALT00000014167 |              |
| ENSGALT00000027945 | RAD51AP1  | ENSGALT00000014151 |              |
| ENSGALT00000027937 |           | ENSGALT00000024335 | OSBPL1<br>A  |
| ENSGALT00000030043 |           | ENSGALT00000021457 | PLXNB2       |
| ENSGALT00000021680 | PRMT8     | ENSGALT00000024382 | ZNF521       |
| ENSGALT00000023174 | TSPAN9    | ENSGALT00000024407 | KCTD1        |
| ENSGALT00000021894 | TULP3     | ENSGALT00000014313 |              |
| ENSGALT00000023158 |           | ENSGALT00000014328 | ASB15        |
| ENSGALT00000023157 | NECAP1    | ENSGALT00000014337 |              |
| ENSGALT00000023154 | FOXJ2     | ENSGALT00000014340 | IQUB         |
| ENSGALT00000023197 | MAN1A2    | ENSGALT00000024417 |              |
| ENSGALT00000023287 |           | ENSGALT00000014357 |              |
| ENSGALT00000035021 |           | ENSGALT00000014559 | AASS         |
| ENSGALT00000022680 | FBXO40    | ENSGALT00000014601 |              |
| ENSGALT00000023323 |           | ENSGALT00000014754 |              |
| ENSGALT00000023360 |           | ENSGALT00000014827 |              |
| ENSGALT00000023361 |           | ENSGALT00000015281 |              |
| ENSGALT00000023441 | USP5      | ENSGALT00000015293 |              |
| ENSGALT00000023442 |           | ENSGALT00000024463 | TRAPPC<br>8  |
| ENSGALT00000023485 |           | ENSGALT00000015373 | TMEM16<br>8  |
| ENSGALT00000023492 |           | ENSGALT00000030698 | LSMEM1       |
| ENSGALT00000023493 |           | ENSGALT00000015454 |              |
| ENSGALT00000023496 | LPCAT3    | ENSGALT00000015456 |              |
| ENSGALT00000023646 | CLSTN3    | ENSGALT00000015471 |              |
| ENSGALT00000023686 | CLCN1     | ENSGALT00000015526 |              |
| ENSGALT00000023710 |           | ENSGALT00000024497 | GAREM        |
| ENSGALT00000029277 | YBX3      | ENSGALT00000015532 |              |
| ENSGALT00000023808 | STYK1     | ENSGALT00000015593 | ADAMTS<br>20 |
| ENSGALT00000023745 | GABARAPL3 | ENSGALT00000015635 |              |
| ENSGALT00000023883 | GDAP2     | ENSGALT00000015636 | TMEM11<br>7  |
| ENSGALT00000023902 |           | ENSGALT00000015735 | ARID2        |
| ENSGALT00000023908 |           | ENSGALT00000015787 |              |
| ENSGALT00000023929 | CTC1      | ENSGALT00000015837 |              |
| ENSGALT00000024021 |           | ENSGALT00000015853 |              |
| ENSGALT00000024035 |           | ENSGALT00000024545 | DTNA         |

|                    |          |                    |          |
|--------------------|----------|--------------------|----------|
| ENSGALT00000024112 | GTF2E1   | ENSGALT00000015861 |          |
| ENSGALT00000024149 | LRRC58   | ENSGALT00000015878 |          |
| ENSGALT00000030475 | GSK3B    | ENSGALT00000015976 |          |
| ENSGALT00000030474 | COX17    | ENSGALT00000015981 | RPL18A   |
| ENSGALT00000036952 |          | ENSGALT00000015988 |          |
| ENSGALT00000024296 |          | ENSGALT00000015999 |          |
| ENSGALT00000024306 | TMEM39A  | ENSGALT00000016025 |          |
| ENSGALT00000024316 | B4GALT3  | ENSGALT00000016059 |          |
| ENSGALT00000024321 | ARHGAP31 | ENSGALT00000016099 | CAND1    |
| ENSGALT00000024333 | IGSF11   | ENSGALT00000016139 |          |
| ENSGALT00000024400 |          | ENSGALT00000016160 |          |
| ENSGALT00000024518 | SLC35A5  | ENSGALT00000016192 |          |
| ENSGALT00000024565 | CCDC181  | ENSGALT00000016187 |          |
| ENSGALT00000024570 | BLZF1    | ENSGALT00000021064 | MCM4     |
| ENSGALT00000030447 | DPT      | ENSGALT00000016330 | PTPRB    |
| ENSGALT00000024599 | TIPRL    | ENSGALT00000024594 | SNAI2    |
| ENSGALT00000024600 | GPR161   | ENSGALT00000041400 | C8orf22  |
| ENSGALT00000024611 | COL8A1   | ENSGALT00000016545 | ZFC3H1   |
| ENSGALT00000024648 | FILIP1L  | ENSGALT00000016553 | RAB21    |
| ENSGALT00000024670 | TOMM70A  | ENSGALT00000024628 | RB1CC1   |
| ENSGALT00000024692 | TFG      | ENSGALT00000022162 |          |
| ENSGALT00000024704 | ABI3BP   | ENSGALT00000016625 |          |
| ENSGALT00000024748 | ZBTB11   | ENSGALT00000016660 | OSBPL8   |
| ENSGALT00000024756 | RPL24    | ENSGALT00000024663 |          |
| ENSGALT00000024772 | CBLB     | ENSGALT00000024757 |          |
| ENSGALT00000024777 | BBX      | ENSGALT00000029932 |          |
| ENSGALT00000024797 | PVRL3    | ENSGALT00000024867 |          |
| ENSGALT00000024806 | PLCXD2   | ENSGALT00000024871 | PENK     |
| ENSGALT00000024813 | ABHD10   | ENSGALT00000024873 | IMPAD1   |
| ENSGALT00000024837 |          | ENSGALT00000024899 |          |
| ENSGALT00000024843 | C3orf38  | ENSGALT00000018193 | C12orf50 |
| ENSGALT00000024855 | PROS1    | ENSGALT00000024908 | NSMAF    |
| ENSGALT00000024861 | ARL13B   | ENSGALT00000018208 | C12orf29 |
| ENSGALT00000024895 | DCAF6    | ENSGALT00000018221 | CEP290   |
| ENSGALT00000024900 |          | ENSGALT00000018257 | TMTC3    |
| ENSGALT00000024901 | MPZL1    | ENSGALT00000018392 |          |
| ENSGALT00000030405 |          | ENSGALT00000018400 |          |
| ENSGALT00000024931 | PTGFRN   | ENSGALT00000018404 | EEA1     |
| ENSGALT00000024944 | IGSF3    | ENSGALT00000018413 |          |
| ENSGALT00000041393 |          | ENSGALT00000030642 |          |
| ENSGALT00000024990 |          | ENSGALT00000018428 |          |
| ENSGALT00000025002 | GBE1     | ENSGALT00000024965 | ASPH     |

|                    |          |                    |             |
|--------------------|----------|--------------------|-------------|
| ENSGALT00000025252 |          | ENSGALT00000024998 | GGH         |
| ENSGALT00000036824 |          | ENSGALT00000030640 | CCDC41      |
| ENSGALT00000030387 |          | ENSGALT00000018479 |             |
| ENSGALT00000025349 | CHODL    | ENSGALT00000018529 | VEZT        |
| ENSGALT00000025402 | ATP5J    | ENSGALT00000025000 |             |
| ENSGALT00000025465 | ADAMTS1  | ENSGALT00000022941 | ADHFE1      |
| ENSGALT00000025470 | ADAMTS5  | ENSGALT00000018639 |             |
| ENSGALT00000025479 |          | ENSGALT00000025029 |             |
| ENSGALT00000025494 | USP16    | ENSGALT00000018679 | CDK17       |
| ENSGALT00000025511 | MAP3K7CL | ENSGALT00000018716 |             |
| ENSGALT00000025518 | BACH1    | ENSGALT00000018773 |             |
| ENSGALT00000025595 | HUNK     | ENSGALT00000023424 |             |
| ENSGALT00000025608 | URB1     | ENSGALT00000025048 | CSPPI       |
| ENSGALT00000025609 |          | ENSGALT00000025075 | ARFGEF<br>1 |
| ENSGALT00000025637 | SYNJ1    | ENSGALT00000018870 |             |
| ENSGALT00000025691 |          | ENSGALT00000025131 | SLCO5A1     |
| ENSGALT00000025738 |          | ENSGALT00000025181 |             |
| ENSGALT00000025788 | ITSN1    | ENSGALT00000030884 | MSC         |
| ENSGALT00000025800 |          | ENSGALT00000019040 |             |
| ENSGALT00000030355 | HLCS     | ENSGALT00000019063 | NUP205      |
| ENSGALT00000025859 | TTC3     | ENSGALT00000025372 |             |
| ENSGALT00000025863 | DSCR3    | ENSGALT00000025409 | ZNF704      |
| ENSGALT00000025866 |          | ENSGALT00000030862 | PAG1        |
| ENSGALT00000025873 |          | ENSGALT00000025468 |             |
| ENSGALT00000030348 |          | ENSGALT00000025499 | LRRCC1      |
| ENSGALT00000025882 | BRWD1    | ENSGALT00000025504 | CA13        |
| ENSGALT00000025891 |          | ENSGALT00000019173 |             |
| ENSGALT00000025999 |          | ENSGALT00000019187 |             |
| ENSGALT00000026046 | ABCG1    | ENSGALT00000019245 |             |
| ENSGALT00000026078 | SLC37A1  | ENSGALT00000019256 |             |
| ENSGALT00000026088 | WDR4     | ENSGALT00000030620 |             |
| ENSGALT00000036704 |          | ENSGALT00000025563 |             |
| ENSGALT00000026100 | PKNOX1   | ENSGALT00000019301 | PLBD1       |
| ENSGALT00000026110 | CBS      | ENSGALT00000036640 |             |
| ENSGALT00000026117 |          | ENSGALT00000019356 |             |
| ENSGALT00000026124 |          | ENSGALT00000019412 |             |
| ENSGALT00000026125 | AGPAT3   | ENSGALT00000019419 | FAM109B     |
| ENSGALT00000036686 | TRAPPC10 | ENSGALT00000025621 |             |
| ENSGALT00000030337 |          | ENSGALT00000025631 |             |
| ENSGALT00000026133 |          | ENSGALT00000019444 | CCDC13<br>4 |

|                    |         |                    |              |
|--------------------|---------|--------------------|--------------|
| ENSGALT00000026167 |         | ENSGALT00000025647 | DECR1        |
| ENSGALT00000026174 |         | ENSGALT00000019461 | NHP2L1       |
| ENSGALT00000026181 | MED14   | ENSGALT00000019464 | DESI1        |
| ENSGALT00000026187 |         | ENSGALT00000019482 | PMM1         |
| ENSGALT00000036653 | BCOR    | ENSGALT00000019494 |              |
| ENSGALT00000026207 |         | ENSGALT00000019497 |              |
| ENSGALT00000026211 | RPGR    | ENSGALT00000037963 |              |
| ENSGALT00000026220 |         | ENSGALT00000019514 | ZC3H7B       |
| ENSGALT00000026229 |         | ENSGALT00000025676 |              |
| ENSGALT00000026255 | TAB3    | ENSGALT00000025692 |              |
| ENSGALT00000026256 |         | ENSGALT00000025711 |              |
| ENSGALT00000026334 |         | ENSGALT00000019565 |              |
| ENSGALT00000026357 |         | ENSGALT00000019589 | XPNPEP<br>3  |
| ENSGALT00000026363 |         | ENSGALT00000019595 |              |
| ENSGALT00000026366 | APOO    | ENSGALT00000025714 | RNF151       |
| ENSGALT00000026387 | PRDX4   | ENSGALT00000025727 | KIAA1429     |
| ENSGALT00000030302 | SMPX    | ENSGALT00000019602 | SLC25A1<br>7 |
| ENSGALT00000026441 | CNKS2   | ENSGALT00000025742 | DPY19L4      |
| ENSGALT00000026456 | RPS6KA3 | ENSGALT00000019637 | SGSM3        |
| ENSGALT00000026507 |         | ENSGALT00000025759 |              |
| ENSGALT00000026711 |         | ENSGALT00000030837 | NDUFAF<br>6  |
| ENSGALT00000026728 | ASB11   | ENSGALT00000025765 |              |
| ENSGALT00000026750 | GEMIN8  | ENSGALT00000025772 |              |
| ENSGALT00000026753 |         | ENSGALT00000025777 |              |
| ENSGALT00000026755 | OFD1    | ENSGALT00000036623 | MTDH         |
| ENSGALT00000026761 |         | ENSGALT00000023439 | MATN2        |
| ENSGALT00000026762 |         | ENSGALT00000037892 |              |
| ENSGALT00000026770 |         | ENSGALT00000019837 | MIEF1        |
| ENSGALT00000026803 | CLCN4   | ENSGALT00000019854 |              |
| ENSGALT00000026817 |         | ENSGALT00000029404 | HRS12        |
| ENSGALT00000026856 | MXRA5   | ENSGALT00000025801 |              |
| ENSGALT00000026917 | DHRX    | ENSGALT00000025802 | OSR2         |
| ENSGALT00000026925 |         | ENSGALT00000030604 |              |
| ENSGALT00000026928 | ASMTL   | ENSGALT00000019957 | JOSD1        |
| ENSGALT00000026955 | PPP2R3B | ENSGALT00000030602 | TOMM22       |
| ENSGALT00000026992 | JADE3   | ENSGALT00000019954 |              |
| ENSGALT00000026993 |         | ENSGALT00000030826 |              |
| ENSGALT00000027008 | CYFIP1  | ENSGALT00000030825 | POLR2K       |
| ENSGALT00000027031 | ATP10A  | ENSGALT00000020002 | DDX17        |

|                    |           |                    |         |
|--------------------|-----------|--------------------|---------|
| ENSGALT00000027040 | UBE3A     | ENSGALT00000025842 | RNF19A  |
| ENSGALT00000036592 |           | ENSGALT00000028271 | ANKRD4  |
| ENSGALT00000027049 | INPP4A    |                    | 6       |
| ENSGALT00000027060 | MITD1     | ENSGALT00000023333 |         |
| ENSGALT00000036589 | TXNDC9    | ENSGALT00000020009 |         |
| ENSGALT00000027071 | AFF3      | ENSGALT00000020049 |         |
| ENSGALT00000027073 | LONRF2    | ENSGALT00000020069 |         |
| ENSGALT00000027078 |           | ENSGALT00000025855 | RRM2B   |
| ENSGALT00000027087 | CNOT11    | ENSGALT00000030592 | PICK1   |
|                    |           | ENSGALT00000025850 | UBR5    |
| ENSGALT00000027090 | RNF149    |                    | ANKRD5  |
|                    |           | ENSGALT00000020100 | 4       |
| ENSGALT00000027110 | SLC9A2    | ENSGALT00000020120 |         |
| ENSGALT00000027111 | MFSD9     | ENSGALT00000025898 |         |
| ENSGALT00000027114 |           | ENSGALT00000020485 | RASD2   |
| ENSGALT00000027121 |           | ENSGALT00000020490 |         |
| ENSGALT00000027123 | UXS1      | ENSGALT00000037765 |         |
| ENSGALT00000027129 | GCC2      | ENSGALT00000020498 |         |
| ENSGALT00000027149 |           | ENSGALT00000020504 | HMGXB4  |
| ENSGALT00000027160 |           | ENSGALT00000025906 | LRP12   |
| ENSGALT00000027166 | ADPRHL1   | ENSGALT00000025930 |         |
| ENSGALT00000027172 |           | ENSGALT00000025937 |         |
| ENSGALT00000027189 | TUBGCP3   | ENSGALT00000020590 | RTCB    |
| ENSGALT00000027194 | IRS2      | ENSGALT00000030816 |         |
| ENSGALT00000027208 |           | ENSGALT00000020623 | BTBD11  |
| ENSGALT00000027212 | CARKD     | ENSGALT00000025971 |         |
| ENSGALT00000027229 |           | ENSGALT00000025969 | UTP23   |
| ENSGALT00000027231 |           | ENSGALT00000025968 |         |
| ENSGALT00000027236 |           | ENSGALT00000025965 |         |
| ENSGALT00000027237 |           | ENSGALT00000020629 |         |
| ENSGALT00000027238 |           | ENSGALT00000020633 | RIC8B   |
| ENSGALT00000027240 | KDELC1    | ENSGALT00000026501 |         |
| ENSGALT00000027243 | METTLL21C | ENSGALT00000026492 | TAF2    |
| ENSGALT00000027257 | TMTC4     | ENSGALT00000026481 | DSCC1   |
| ENSGALT00000027264 | CLYBL     | ENSGALT00000020663 | CKAP4   |
| ENSGALT00000027267 | TM9SF2    | ENSGALT00000020668 | NUAK1   |
| ENSGALT00000027285 |           | ENSGALT00000026475 |         |
| ENSGALT00000027289 |           | ENSGALT00000026431 |         |
| ENSGALT00000030196 |           | ENSGALT00000020683 |         |
| ENSGALT00000027314 | GPR180    | ENSGALT00000026409 | ATAD2   |
| ENSGALT00000027315 | TGDS      | ENSGALT00000026383 | FAM91A1 |
| ENSGALT00000027349 | CLN5      | ENSGALT00000026348 |         |

|                    |           |                    |             |
|--------------------|-----------|--------------------|-------------|
| ENSGALT00000027350 |           | ENSGALT00000026343 |             |
| ENSGALT00000027356 |           | ENSGALT00000026325 | KIAA0196    |
| ENSGALT00000027358 | COMMD6    | ENSGALT00000026313 | TRIB1       |
| ENSGALT00000027364 | KLF5      | ENSGALT00000020764 | HCFC2       |
| ENSGALT00000027373 |           | ENSGALT00000020765 |             |
| ENSGALT00000023466 |           | ENSGALT00000026309 |             |
| ENSGALT00000027397 |           | ENSGALT00000020769 |             |
| ENSGALT00000027403 | RGCC      | ENSGALT00000030784 | FAM49B      |
| ENSGALT00000027404 | VWA8      | ENSGALT00000020773 |             |
| ENSGALT00000027432 | SLC25A30  | ENSGALT00000020783 | NT5DC3      |
| ENSGALT00000027434 | COG3      | ENSGALT00000026194 |             |
| ENSGALT00000027439 | ZC3H13    | ENSGALT00000026149 |             |
| ENSGALT00000027443 |           | ENSGALT00000020821 |             |
| ENSGALT00000027446 | KIAA0226L | ENSGALT00000020822 | CCDC53      |
| ENSGALT00000027451 |           | ENSGALT00000020826 | GNPTAB      |
| ENSGALT00000027453 |           | ENSGALT00000020831 | SYCP3       |
| ENSGALT00000030149 |           | ENSGALT00000020835 |             |
| ENSGALT00000027460 |           | ENSGALT00000026120 | KHDRBS<br>3 |
| ENSGALT00000027462 | RCBTB2    | ENSGALT00000020864 | PARP12      |
| ENSGALT00000027476 |           | ENSGALT00000020873 | HIPK2       |
| ENSGALT00000030134 |           | ENSGALT00000026092 | AGO2        |
| ENSGALT00000027511 | THSD1     | ENSGALT00000020879 | KIAA1549    |
| ENSGALT00000027522 |           | ENSGALT00000026043 | PTP4A3      |
| ENSGALT00000027523 | COG6      | ENSGALT00000026001 | RHPN1       |
| ENSGALT00000027525 | LHFP      | ENSGALT00000020934 |             |
| ENSGALT00000027526 | NHLRC3    | ENSGALT00000020949 |             |
| ENSGALT00000027527 | PROSER1   | ENSGALT00000020953 | KDM7A       |
| ENSGALT00000027540 |           | ENSGALT00000025983 | PYCRL       |
| ENSGALT00000027550 | SPG20     | ENSGALT00000020957 |             |
| ENSGALT00000027564 |           | ENSGALT00000020962 |             |
| ENSGALT00000027566 | STARD13   | ENSGALT00000020996 | AGK         |
| ENSGALT00000027571 |           | ENSGALT00000021001 | KIAA1147    |
| ENSGALT00000027575 | N4BP2L1   | ENSGALT00000000104 | NRBP2       |
| ENSGALT00000027584 | B3GALTL   | ENSGALT00000021056 | SYT10       |
| ENSGALT00000027586 |           | ENSGALT00000021073 | YARS2       |
| ENSGALT00000036455 |           | ENSGALT00000021086 |             |
| ENSGALT00000027597 |           | ENSGALT00000021101 | KIAA1551    |
| ENSGALT00000027598 |           | ENSGALT00000021115 |             |
| ENSGALT00000030102 | POMP      | ENSGALT00000021125 | IPO8        |
| ENSGALT00000027609 | PAN3      | ENSGALT00000021134 | TMTC1       |
| ENSGALT00000027616 | LNX2      | ENSGALT00000021202 | B4GALN      |

|                    |         |                    |              |
|--------------------|---------|--------------------|--------------|
|                    |         |                    | T3           |
| ENSGALT00000027647 |         | ENSGALT00000021213 | ERC1         |
| ENSGALT00000027648 | MTMR6   | ENSGALT00000021246 | DCP1B        |
| ENSGALT00000027655 | MIPEP   | ENSGALT00000021270 | CECR5        |
| ENSGALT00000027657 |         | ENSGALT00000021281 |              |
| ENSGALT00000027661 | SGCG    | ENSGALT00000021282 | BCL2L13      |
| ENSGALT00000027664 | MICU2   | ENSGALT00000021284 |              |
| ENSGALT00000027671 |         | ENSGALT00000021332 |              |
| ENSGALT00000027676 |         | ENSGALT00000005490 |              |
| ENSGALT00000027677 |         | ENSGALT00000021340 |              |
| ENSGALT00000027679 | IFT88   | ENSGALT00000021369 | EPS8         |
| ENSGALT00000027680 |         | ENSGALT00000021374 |              |
| ENSGALT00000027690 |         | ENSGALT00000021380 |              |
| ENSGALT00000021058 |         | ENSGALT00000021439 | PLEKHA5      |
| ENSGALT00000027705 | ZC3H12C | ENSGALT00000021517 |              |
| ENSGALT00000027709 |         | ENSGALT00000021521 | BCAT1        |
| ENSGALT00000027711 | KDELC2  | ENSGALT00000021594 |              |
| ENSGALT00000027716 | NPAT    | ENSGALT00000021607 | CMAS         |
| ENSGALT00000027725 | CUL5    | ENSGALT00000021626 | ABCC9        |
| ENSGALT00000027729 |         | ENSGALT00000022726 |              |
| ENSGALT00000027735 | CWF19L2 | ENSGALT00000022784 | ITPR2        |
| ENSGALT00000027738 | GUCY1A2 | ENSGALT00000022808 | TM7SF3       |
| ENSGALT00000027745 | MSANTD4 | ENSGALT00000022820 |              |
| ENSGALT00000027757 | DCUN1D5 | ENSGALT00000022856 | CYB5R3       |
| ENSGALT00000036427 |         | ENSGALT00000022912 |              |
| ENSGALT00000027799 | MAML2   | ENSGALT00000022959 |              |
| ENSGALT00000027803 | CEP57   | ENSGALT00000022966 | PARVB        |
| ENSGALT00000027811 | ENDOD1  | ENSGALT00000022984 |              |
| ENSGALT00000027813 |         | ENSGALT00000022998 |              |
| ENSGALT00000027816 |         | ENSGALT00000023003 | KIAA0930     |
| ENSGALT00000027818 | ANKRD49 | ENSGALT00000023014 |              |
| ENSGALT00000027822 | PANX1   | ENSGALT00000023016 | ATXN10       |
| ENSGALT00000027831 |         | ENSGALT00000015796 |              |
| ENSGALT00000036407 |         | ENSGALT00000018841 | LRP6         |
| ENSGALT00000027863 | NOX4    | ENSGALT00000022888 |              |
| ENSGALT00000027869 | CTSC    | ENSGALT00000021942 |              |
| ENSGALT00000027880 | ME3     | ENSGALT00000027945 | RAD51A<br>P1 |
| ENSGALT00000027882 | RAB30   | ENSGALT00000027944 |              |
| ENSGALT00000027884 | PCF11   | ENSGALT00000027937 |              |
| ENSGALT00000027888 | CCDC90B | ENSGALT00000021680 | PRMT8        |
| ENSGALT00000022773 |         | ENSGALT00000023174 | TSPAN9       |



|                    |          |                    |               |
|--------------------|----------|--------------------|---------------|
| ENSGALT0000002817  |          | ENSGALT00000021894 | TULP3         |
| ENSGALT00000027904 | NARS2    | ENSGALT00000021889 |               |
| ENSGALT00000000128 | INTS4    | ENSGALT00000023162 | ITFG2         |
| ENSGALT00000002458 | AQP11    | ENSGALT00000023158 |               |
| ENSGALT00000000963 |          | ENSGALT00000023157 | NECAP1        |
| ENSGALT00000001192 | LRRC32   | ENSGALT00000023154 | FOXJ2         |
| ENSGALT00000001212 | C11orf30 | ENSGALT00000023070 |               |
| ENSGALT00000036387 |          | ENSGALT00000023197 | MAN1A2        |
| ENSGALT00000001279 | RNF121   | ENSGALT00000023284 |               |
| ENSGALT00000001911 |          | ENSGALT00000023287 |               |
| ENSGALT00000028034 |          | ENSGALT00000035021 |               |
| ENSGALT00000028035 | STIM1    | ENSGALT00000022680 | FBXO40        |
| ENSGALT00000022062 |          | ENSGALT00000023323 |               |
| ENSGALT00000014840 | DGAT2    | ENSGALT00000023360 |               |
| ENSGALT00000018287 |          | ENSGALT00000023361 |               |
| ENSGALT00000036364 |          | ENSGALT00000023441 | USP5          |
| ENSGALT00000028004 | FCHSD2   | ENSGALT00000023442 |               |
| ENSGALT00000028002 | P2RY2    | ENSGALT00000023476 | ATN1          |
| ENSGALT00000027997 |          | ENSGALT00000023485 |               |
| ENSGALT00000027995 | FAM168A  | ENSGALT00000023492 |               |
| ENSGALT00000031276 |          | ENSGALT00000023493 |               |
| ENSGALT00000027989 |          | ENSGALT00000023496 | LPCAT3        |
| ENSGALT00000027978 |          | ENSGALT00000023545 |               |
| ENSGALT00000027969 | RNF169   | ENSGALT00000023646 | CLSTN3        |
| ENSGALT00000027966 |          | ENSGALT00000023672 |               |
| ENSGALT00000027961 | SLCO2B1  | ENSGALT00000023686 | CLCN1         |
| ENSGALT00000026436 | KLHL34   | ENSGALT00000023710 |               |
| ENSGALT00000027059 |          | ENSGALT00000029277 | YBX3          |
| ENSGALT00000027144 | CHAMP1   | ENSGALT00000023808 | STYK1         |
| ENSGALT00000027875 | PRSS23   | ENSGALT00000023745 | GABARA<br>PL3 |
| ENSGALT00000001106 |          | ENSGALT00000023834 | WARS2         |
| ENSGALT00000028001 |          | ENSGALT00000023883 | GDAP2         |
| ENSGALT00000007813 | TMEM119  | ENSGALT00000023902 |               |
| ENSGALT00000010788 | PPP1R3C  | ENSGALT00000023908 |               |
| ENSGALT00000033218 | HPS6     | ENSGALT00000023929 | CTC1          |
| ENSGALT00000021627 |          | ENSGALT00000024112 | GTF2E1        |
| ENSGALT00000024049 | HSPB3    | ENSGALT00000024149 | LRRC58        |
| ENSGALT00000024082 | ENC1     | ENSGALT00000036952 |               |
| ENSGALT00000024541 |          | ENSGALT00000024232 | VANGL1        |
| ENSGALT00000017083 | PWWP2B   | ENSGALT00000024296 |               |
| ENSGALT00000001841 | MSL2     | ENSGALT00000024306 | TMEM39        |

|                    |          |                    |              |
|--------------------|----------|--------------------|--------------|
| ENSGALT0000001984  |          | ENSGALT00000024316 | A<br>B4GALT3 |
| ENSGALT00000028055 | SPSB4    | ENSGALT00000024321 | ARHGAP<br>31 |
| ENSGALT00000004533 | ZBTB38   | ENSGALT00000024346 | ZBTB20       |
| ENSGALT00000015525 | B3GALNT1 | ENSGALT00000024400 |              |
| ENSGALT00000017230 | FLRT2    | ENSGALT00000024449 | BOC          |
| ENSGALT00000019144 |          | ENSGALT00000024503 |              |
| ENSGALT00000019230 | APOLD1   | ENSGALT00000024530 |              |
| ENSGALT00000022862 | A4GALT   | ENSGALT00000024565 | CCDC18<br>1  |
| ENSGALT00000025294 | NRIP1    | ENSGALT00000024570 | BLZF1        |
| ENSGALT00000026015 | ZBTB21   | ENSGALT00000024577 | NME7         |
| ENSGALT00000006628 | FEM1A    | ENSGALT00000030447 | DPT          |
| ENSGALT00000002482 | UTS2R    | ENSGALT00000024599 | TIPRL        |
| ENSGALT00000011909 |          | ENSGALT00000024600 | GPR161       |
| ENSGALT00000001876 |          | ENSGALT00000024611 | COL8A1       |
| ENSGALT00000010978 | CCDC71   | ENSGALT00000024648 | FILIP1L      |
| ENSGALT00000009947 | HNRNPA0  | ENSGALT00000024670 | TOMM70<br>A  |
| ENSGALT00000005527 |          | ENSGALT00000024692 | TFG          |
| ENSGALT00000030942 | LRRC30   | ENSGALT00000024704 | ABI3BP       |
| ENSGALT00000023833 |          | ENSGALT00000024748 | ZBTB11       |
| ENSGALT00000026439 | ZHX2     | ENSGALT00000024756 | RPL24        |
| ENSGALT00000026354 |          | ENSGALT00000024769 |              |
| ENSGALT00000007889 |          | ENSGALT00000024772 | CBLB         |
| ENSGALT00000014752 |          | ENSGALT00000024777 | BBX          |
| ENSGALT00000018781 |          | ENSGALT00000024797 | PVRL3        |
| ENSGALT00000013613 |          | ENSGALT00000024806 | PLCXD2       |
| ENSGALT00000013616 | THBD     | ENSGALT00000024813 | ABHD10       |
| ENSGALT00000014184 | FLRT3    | ENSGALT00000024837 |              |
| ENSGALT00000017169 | CDC42EP3 | ENSGALT00000024841 |              |
| ENSGALT00000017907 | IRF2BP2  | ENSGALT00000024843 | C3orf38      |
| ENSGALT00000034432 | B3GNT9   | ENSGALT00000024855 | PROS1        |
| ENSGALT00000007124 | PLEKHF1  | ENSGALT00000024861 | ARL13B       |
| ENSGALT00000008264 | PDP2     | ENSGALT00000024895 | DCAF6        |
| ENSGALT00000008793 |          | ENSGALT00000024900 |              |
| ENSGALT00000006800 | CHST12   | ENSGALT00000024901 | MPZL1        |
| ENSGALT00000007518 |          | ENSGALT00000030405 |              |
| ENSGALT00000012664 | VASN     | ENSGALT00000024931 | PTGFRN       |
| ENSGALT00000006563 |          | ENSGALT00000024944 | IGSF3        |
| ENSGALT00000009554 | AGTR2    | ENSGALT00000024984 |              |

|                    |          |                    |         |
|--------------------|----------|--------------------|---------|
| ENSGALT00000012049 |          | ENSGALT00000024990 |         |
| ENSGALT00000014023 |          | ENSGALT00000024991 | VGLL3   |
| ENSGALT00000014971 | SLITRK2  | ENSGALT00000025002 | GBE1    |
| ENSGALT00000024087 | HS3ST1   | ENSGALT00000025252 |         |
| ENSGALT00000013006 |          | ENSGALT00000036824 |         |
| ENSGALT00000033813 |          | ENSGALT00000030387 |         |
| ENSGALT00000013983 | GPR1     | ENSGALT00000025349 | CHODL   |
| ENSGALT00000015011 |          | ENSGALT00000025402 | ATP5J   |
|                    |          |                    | ADAMTS  |
| ENSGALT00000033212 | PHOSPHO2 | ENSGALT00000025465 | 1       |
|                    |          |                    | ADAMTS  |
| ENSGALT00000018926 | TMEM177  | ENSGALT00000025470 | 5       |
|                    |          |                    |         |
| ENSGALT00000034796 |          | ENSGALT00000025479 |         |
| ENSGALT00000004272 |          | ENSGALT00000025494 | USP16   |
|                    |          |                    | MAP3K7  |
| ENSGALT00000011035 | KLHL25   | ENSGALT00000025511 | CL      |
|                    |          |                    |         |
| ENSGALT00000011869 | KBTBD13  | ENSGALT00000025518 | BACH1   |
| ENSGALT00000018475 | SNAPC3   | ENSGALT00000025595 | HUNK    |
| ENSGALT00000029098 |          | ENSGALT00000025608 | URB1    |
| ENSGALT00000029086 |          | ENSGALT00000025609 |         |
| ENSGALT00000029081 |          | ENSGALT00000025637 | SYNJ1   |
| ENSGALT00000029080 |          | ENSGALT00000025680 | PAXBP1  |
| ENSGALT00000029077 |          | ENSGALT00000025738 |         |
| ENSGALT00000024828 | HOOK3    | ENSGALT00000025788 | ITSN1   |
|                    |          | ENSGALT00000025800 |         |
|                    |          | ENSGALT00000025844 |         |
|                    |          | ENSGALT00000030355 | HLCS    |
|                    |          | ENSGALT00000025859 | TTC3    |
|                    |          | ENSGALT00000025863 | DSCR3   |
|                    |          | ENSGALT00000025866 |         |
|                    |          | ENSGALT00000025873 |         |
|                    |          | ENSGALT00000030348 |         |
|                    |          | ENSGALT00000025882 | BRWD1   |
|                    |          | ENSGALT00000025891 |         |
|                    |          | ENSGALT00000026021 | C2CD2   |
|                    |          | ENSGALT00000026046 | ABCG1   |
|                    |          | ENSGALT00000026078 | SLC37A1 |
|                    |          | ENSGALT00000026088 | WDR4    |
|                    |          | ENSGALT00000036704 |         |
|                    |          | ENSGALT00000026100 | PKNOX1  |
|                    |          | ENSGALT00000026104 |         |
|                    |          | ENSGALT00000026110 | CBS     |

|                    |         |
|--------------------|---------|
| ENSGALT00000026124 |         |
| ENSGALT00000026125 | AGPAT3  |
| ENSGALT00000030337 |         |
| ENSGALT00000026133 |         |
| ENSGALT00000026137 | CXorf36 |
| ENSGALT00000026167 |         |
| ENSGALT00000026174 |         |
| ENSGALT00000026181 | MED14   |
| ENSGALT00000026187 |         |
| ENSGALT00000026207 |         |
| ENSGALT00000026211 | RPGR    |
| ENSGALT00000026220 |         |
| ENSGALT00000026229 |         |
| ENSGALT00000026250 |         |
| ENSGALT00000026256 |         |
| ENSGALT00000026334 |         |
| ENSGALT00000026357 |         |
| ENSGALT00000026363 |         |
| ENSGALT00000026366 | APOO    |
| ENSGALT00000026387 | PRDX4   |
| ENSGALT00000030302 | SMPX    |
| ENSGALT00000026441 | CNKSR2  |
| ENSGALT00000026456 | RPS6KA3 |
| ENSGALT00000026507 |         |
| ENSGALT00000026711 |         |
| ENSGALT00000026728 | ASB11   |
| ENSGALT00000026750 | GEMIN8  |
| ENSGALT00000026753 |         |
| ENSGALT00000026755 | OFD1    |
| ENSGALT00000026761 |         |
| ENSGALT00000026770 |         |
| ENSGALT00000026790 | MSL3    |
| ENSGALT00000026803 | CLCN4   |
| ENSGALT00000026856 | MXRA5   |
| ENSGALT00000026917 | DHRX    |
| ENSGALT00000026925 |         |
| ENSGALT00000026928 | ASMTL   |
| ENSGALT00000026955 | PPP2R3B |
| ENSGALT00000026992 | JADE3   |
| ENSGALT00000026993 |         |
| ENSGALT00000027008 | CYFIP1  |
| ENSGALT00000027031 | ATP10A  |

|                    |             |
|--------------------|-------------|
| ENSGALT00000027040 | UBE3A       |
| ENSGALT00000036592 |             |
| ENSGALT00000027049 | INPP4A      |
| ENSGALT00000027060 | MITD1       |
| ENSGALT00000036589 | TXNDC9      |
| ENSGALT00000027073 | LONRF2      |
| ENSGALT00000027078 |             |
| ENSGALT00000027087 | CNOT11      |
| ENSGALT00000027090 | RNF149      |
| ENSGALT00000027110 | SLC9A2      |
| ENSGALT00000027111 | MFSD9       |
| ENSGALT00000027114 |             |
| ENSGALT00000027121 |             |
| ENSGALT00000027129 | GCC2        |
| ENSGALT00000027149 |             |
| ENSGALT00000027160 |             |
| ENSGALT00000027163 |             |
| ENSGALT00000027169 | GRTP1       |
| ENSGALT00000027172 |             |
| ENSGALT00000027180 |             |
| ENSGALT00000027189 | TUBGCP<br>3 |
| ENSGALT00000027194 | IRS2        |
| ENSGALT00000027197 |             |
| ENSGALT00000027208 |             |
| ENSGALT00000027212 | CARKD       |
| ENSGALT00000027229 |             |
| ENSGALT00000027231 |             |
| ENSGALT00000027236 |             |
| ENSGALT00000027237 |             |
| ENSGALT00000027238 |             |
| ENSGALT00000027240 | KDELC1      |
| ENSGALT00000027245 | TPP2        |
| ENSGALT00000027257 | TMTC4       |
| ENSGALT00000027264 | CLYBL       |
| ENSGALT00000027267 | TM9SF2      |
| ENSGALT00000027285 |             |
| ENSGALT00000027289 |             |
| ENSGALT00000027292 | RAP2A       |
| ENSGALT00000030196 |             |
| ENSGALT00000027309 |             |
| ENSGALT00000027314 | GPR180      |

|                    |               |
|--------------------|---------------|
| ENSGALT00000027315 | TGDS          |
| ENSGALT00000027349 | CLN5          |
| ENSGALT00000027350 |               |
| ENSGALT00000027356 |               |
| ENSGALT00000027358 | COMMD6        |
| ENSGALT00000027364 | KLF5          |
| ENSGALT00000027373 |               |
| ENSGALT00000036503 |               |
| ENSGALT00000027391 |               |
| ENSGALT00000027397 |               |
| ENSGALT00000027403 | RGCC          |
| ENSGALT00000027404 | VWA8          |
| ENSGALT00000027432 | SLC25A3<br>0  |
| ENSGALT00000027434 | COG3          |
| ENSGALT00000027439 | ZC3H13        |
| ENSGALT00000027443 |               |
| ENSGALT00000027446 | KIAA0226<br>L |
| ENSGALT00000027451 |               |
| ENSGALT00000027453 |               |
| ENSGALT00000027454 | NUDT15        |
| ENSGALT00000030149 |               |
| ENSGALT00000036484 |               |
| ENSGALT00000027460 |               |
| ENSGALT00000027462 | RCBTB2        |
| ENSGALT00000027476 |               |
| ENSGALT00000027478 | TRIM13        |
| ENSGALT00000030134 |               |
| ENSGALT00000027488 | INTS6         |
| ENSGALT00000027505 |               |
| ENSGALT00000027509 |               |
| ENSGALT00000027510 | VPS36         |
| ENSGALT00000027511 | THSD1         |
| ENSGALT00000027516 |               |
| ENSGALT00000027519 |               |
| ENSGALT00000027522 |               |
| ENSGALT00000027523 | COG6          |
| ENSGALT00000027525 | LHFP          |
| ENSGALT00000027526 | NHLRC3        |
| ENSGALT00000027527 | PROSER<br>1   |

|                    |             |
|--------------------|-------------|
| ENSGALT00000027550 | SPG20       |
| ENSGALT00000027564 |             |
| ENSGALT00000027566 | STARD13     |
| ENSGALT00000027571 |             |
| ENSGALT00000027575 | N4BP2L1     |
| ENSGALT00000027584 | B3GALTL     |
| ENSGALT00000036455 |             |
| ENSGALT00000027595 | KATNAL1     |
| ENSGALT00000027597 |             |
| ENSGALT00000030102 | POMP        |
| ENSGALT00000027616 | LNX2        |
| ENSGALT00000027647 |             |
| ENSGALT00000027648 | MTMR6       |
| ENSGALT00000027655 | MIPEP       |
| ENSGALT00000027657 |             |
| ENSGALT00000027658 | SACS        |
| ENSGALT00000027661 | SGCG        |
| ENSGALT00000027664 | MICU2       |
| ENSGALT00000027671 |             |
| ENSGALT00000027676 |             |
| ENSGALT00000027677 |             |
| ENSGALT00000027679 | IFT88       |
| ENSGALT00000027680 |             |
| ENSGALT00000027690 |             |
| ENSGALT00000021058 |             |
| ENSGALT00000027705 | ZC3H12C     |
| ENSGALT00000027709 |             |
| ENSGALT00000027711 | KDELC2      |
| ENSGALT00000027716 | NPAT        |
| ENSGALT00000027718 |             |
| ENSGALT00000027725 | CUL5        |
| ENSGALT00000027732 | ALKBH8      |
| ENSGALT00000027735 | CWF19L2     |
| ENSGALT00000027745 | MSANTD<br>4 |
| ENSGALT00000030073 |             |
| ENSGALT00000027757 | DCUN1D<br>5 |
| ENSGALT00000036427 |             |
| ENSGALT00000027799 | MAML2       |
| ENSGALT00000027803 | CEP57       |
| ENSGALT00000027807 | FAM76B      |

|                    |             |
|--------------------|-------------|
| ENSGALT00000027810 | SESN3       |
| ENSGALT00000027811 | ENDOD1      |
| ENSGALT00000027816 |             |
| ENSGALT00000027818 | ANKRD4<br>9 |
| ENSGALT00000027831 |             |
| ENSGALT00000027858 | FOLH1       |
| ENSGALT00000027863 | NOX4        |
| ENSGALT00000027869 | CTSC        |
| ENSGALT00000027880 | ME3         |
| ENSGALT00000027882 | RAB30       |
| ENSGALT00000027884 | PCF11       |
| ENSGALT00000027888 | CCDC90<br>B |
| ENSGALT00000022773 |             |
| ENSGALT00000002817 |             |
| ENSGALT00000027904 | NARS2       |
| ENSGALT00000000128 | INTS4       |
| ENSGALT00000002458 | AQP11       |
| ENSGALT00000001093 | CAPN5       |
| ENSGALT00000031372 | ACER3       |
| ENSGALT00000001192 | LRRC32      |
| ENSGALT00000001212 | C11orf30    |
| ENSGALT00000036387 |             |
| ENSGALT00000001279 | RNF121      |
| ENSGALT00000001911 |             |
| ENSGALT00000036371 |             |
| ENSGALT00000028034 |             |
| ENSGALT00000028035 | STIM1       |
| ENSGALT00000022062 |             |
| ENSGALT00000014840 | DGAT2       |
| ENSGALT00000018287 |             |
| ENSGALT00000028004 | FCHSD2      |
| ENSGALT00000028002 | P2RY2       |
| ENSGALT00000027997 |             |
| ENSGALT00000027995 | FAM168A     |
| ENSGALT00000031276 |             |
| ENSGALT00000027989 |             |
| ENSGALT00000027985 |             |
| ENSGALT00000027978 |             |
| ENSGALT00000027969 | RNF169      |
| ENSGALT00000027966 |             |



|                    |          |
|--------------------|----------|
| ENSGALT00000027961 | SLCO2B1  |
| ENSGALT00000026436 | KLHL34   |
| ENSGALT00000027059 |          |
| ENSGALT00000027144 | CHAMP1   |
| ENSGALT00000027875 | PRSS23   |
| ENSGALT00000001106 |          |
| ENSGALT00000028001 |          |
| ENSGALT00000007813 | TMEM119  |
| ENSGALT00000034402 | RNF26    |
| ENSGALT00000010788 | PPP1R3C  |
| ENSGALT00000021627 |          |
| ENSGALT00000024082 | ENC1     |
| ENSGALT00000028361 | GAS1     |
| ENSGALT00000017083 | PWWP2B   |
| ENSGALT00000001841 | MSL2     |
| ENSGALT00000001964 |          |
| ENSGALT00000001984 |          |
| ENSGALT00000004533 | ZBTB38   |
| ENSGALT00000014247 |          |
| ENSGALT00000015525 | B3GALNT1 |
| ENSGALT00000032951 | P2RY14   |
| ENSGALT00000017230 | FLRT2    |
| ENSGALT00000019144 |          |
| ENSGALT00000019840 |          |
| ENSGALT00000020121 |          |
| ENSGALT00000022862 | A4GALT   |
| ENSGALT00000024742 | TRMT10C  |
| ENSGALT00000025294 | NRIP1    |
| ENSGALT00000006628 | FEM1A    |
| ENSGALT00000039218 |          |
| ENSGALT00000002482 | UTS2R    |
| ENSGALT00000011909 |          |
| ENSGALT00000001876 |          |
| ENSGALT00000003739 | RBM15B   |
| ENSGALT00000010978 | CCDC71   |
| ENSGALT00000009947 | HNRNPA0  |
| ENSGALT00000005527 |          |

|                    |              |
|--------------------|--------------|
| ENSGALT00000030942 | LRRC30       |
| ENSGALT00000023833 |              |
| ENSGALT00000024880 | FAM110B      |
| ENSGALT00000026439 | ZHX2         |
| ENSGALT00000026354 |              |
| ENSGALT00000039163 | PIGW         |
| ENSGALT00000007889 |              |
| ENSGALT00000014752 |              |
| ENSGALT00000018177 |              |
| ENSGALT00000018781 |              |
| ENSGALT00000019167 |              |
| ENSGALT00000033345 | LRRC8D       |
| ENSGALT00000013613 |              |
| ENSGALT00000013616 | THBD         |
| ENSGALT00000014184 | FLRT3        |
| ENSGALT00000017169 | CDC42E<br>P3 |
| ENSGALT00000017907 | IRF2BP2      |
| ENSGALT00000003716 | CMTR2        |
| ENSGALT00000034432 | B3GNT9       |
| ENSGALT00000007124 | PLEKHF1      |
| ENSGALT00000008264 | PDP2         |
| ENSGALT00000008793 |              |
| ENSGALT00000006800 | CHST12       |
| ENSGALT00000007518 |              |
| ENSGALT00000040564 |              |
| ENSGALT00000012664 | VASN         |
| ENSGALT00000006563 |              |
| ENSGALT00000009554 | AGTR2        |
| ENSGALT00000012049 |              |
| ENSGALT00000014023 |              |
| ENSGALT00000014971 | SLITRK2      |
| ENSGALT00000024087 | HS3ST1       |
| ENSGALT00000033813 |              |
| ENSGALT00000013983 | GPR1         |
| ENSGALT00000015011 |              |
| ENSGALT00000018926 | TMEM17<br>7  |
| ENSGALT00000034796 |              |
| ENSGALT00000004272 |              |
| ENSGALT00000011035 | KLHL25       |
| ENSGALT00000011869 | KBTBD13      |

|                    |        |
|--------------------|--------|
| ENSGALT00000018475 | SNAPC3 |
| ENSGALT00000029086 |        |
| ENSGALT00000029077 |        |
| ENSGALT00000024822 |        |
| ENSGALT00000024821 | THAP1  |
| ENSGALT00000024828 | HOOK3  |
